# Supplementary material for: QTL analysis identified two major all-internodes solidness loci from a completely solid-stemmed spring wheat line
Source: Front Plant Sci. 2022 Nov 15;13:1035620. doi: 10.3389/fpls.2022.1035620 (PMC9707402; doi:10.3389/fpls.2022.1035620)
Supplement: Supplementary file 1 [file DataSheet_1.xlsx]

## Sheet: S1
Supplementary Table S1: Summary of stem solidness score of 'Sadash/P2711' and 'AAC Innova and P2711' doubled haploids, their parental lines and check cultivars.
Env	Parental lines			Population			Check cultivars
	Hollow Parent (Sadash or 'AAC Innova')	P2711	Mean	Min	Max	Mean	Lillian	'Golden Ball'	Mean
'Sadash/P2711'
LTFD14	1.68333	5	3.34	1.23611	5	3.12	3.36364	4.375	3.87
LTFD19	1.51667	4.98333	3.25	1.33333	5	3.17	4.66667	5	4.83
LTGH19	1.36538	4.78125	3.07	1	4.90625	2.95	2.19444	4.72727	3.46
LSM	1.52	4.92	3.22	1.19	4.97	3.7	3.41	4.7	4.05
'AAC Innova/P2711'
NZFD13	1	3	2	1	3	2	-	-	-
LTGH15	1.2	4.95	3.08	1.05	5	3.03	2.55	4.5	3.53
LTFD15	2.15	4.82	3.49	1.52	4.92	3.22	-	4.8	4.8
LTFD19	1.42	4.98	3.2	1.07	5	3.04	4.81	5	4.91
LSM-LT	1.59	4.92	3.26	1.21	4.97	3.1	3.68	4.77	4.41
Note -	Env: Environment; Lethbridge field trials in 2014 (LTFD14), 2015 (LTFD15) and 2019 (LTFD19), and greenhouse experiments in 2015 (LTGH15) and 2019 (LTGH19), and New Zealand field trial in 2013 (NZFD13).
	LSM: least-square (LS) means; LSM-LT: LS means of Lethbridge environments
	Hollow parent Sadash in 'Sadash/P2711' population and 'AAC Innova' in 'AAC Innova/P2711' population.

## Sheet: S2
Supplementary Table S2: ANOVA for stem solidness score of 'Sadash/P2711' and 'AAC Innova/P2711' doubled haploid populations.
Source	'Sadash/P2711'		'AAC Innova/P2711'
	df	Mean Sq	df	Mean Sq
Environment	2	59.29**	3	235.94**
Genotype	179	2.58**	373	2.65**
Genotype*Environment	342	0.39	935	0.44
Error	344	0.7337	938	1.198
Heritability		0.778586		0.688312
Note -	df, degrees of freedom; Significant at * α = 0.05; ** α = 0.01

## Sheet: S3
Supplementary Table S3: 'Sadash/P2711' linkage map and 15K single nucleotide polymorphism (SNP) genotyping data.
'Sadash/P2711'						Consensus map (Wen et al., 2017)		ITMI		'Kofa/W9262-260D3' (Nilsen et al., 2017)		'Lillian/Vesper' (Nilsen et al., 2017)		Marker genotyping data of parents, doubled haploid population and check cultivars
SNP name	15K array SNP ID	90K array SNP ID	Linkage group	Position	Specific region/ gene	Chromosome	Position	Linkage group	Position	Linkage group	Position	Linkage group	Position	1 Sadash	2 P2711	3	4	5	6	7	8	9	10	11	12	13	14	15	16	17	18	19	20	21	22	23	24	25	26	27	28	29	30	31	32	33	34	35	36
RFL_Contig3481_1669	TG43041D	IWB64368	1A.1	0		1A	22.23							A	B	A	B	B	A	B	A	B	A	A	A	B	A	B	A	A	A	A	B	A	A	B	B	B	A	B	A	B	A	B	A	A	A	B	A
tplb0025b13_2054	TG44281A	IWB74216	1A.1	0		1A	22.23							A	B	A	B	B	A	B	A	B	A	A	A	B	A	B	A	A	A	A	B	A	A	B	B	B	A	B	A	B	A	B	A	A	A	B	A
wsnp_Ku_c1818_3557408	TG46161A	IWA6644	1A.1	0		1A	20.58							A	B	A	B	B	A	B	A	B	A	A	A	B	A	B	A	A	A	A	B	A	A	B	B	B	A	B	A	B	A	B	A	A	A	B	A
BS00059422_51	TG14611A	IWB8776	1A.1	0.6		1A	22.62							A	B	A	B	B	A	B	A	B	A	A	A	B	A	B	A	A	A	A	B	A	A	B	B	B	A	B	A	B	A	B	A	A	A	B	A
BS00026456_51	TG14351A	IWB7628	1A.1	1.1		1A	18.05							A	B	A	B	B	A	B	A	A	A	A	A	B	A	B	A	A	A	A	B	A	A	H	B	B	A	B	A	B	A	B	A	A	A	B	A
TA001286-0611-w	TG2028	IWB65373	1A.1	1.7		1A	24.33	1A	4.1					A	B	A	B	B	A	B	A	A	A	A	A	B	A	B	A	A	A	A	B	A	A	A	B	B	A	B	A	B	A	B	A	A	A	B	A
CAP12_c3074_192	TG03941D	IWB13355	1A.1	2.8		1A	22.23	1A	4.1					A	B	A	B	B	A	B	A	A	A	A	A	B	A	B	A	A	A	A	B	A	A	H	B	B	A	B	A	B	A	B	A	A	A	B	A
TG0003	TG3141		1A.1	3.4										A	B	A	B	B	A	B	A	A	A	A	A	B	A	B	A	A	A	A	B	A	A	H	B	B	A	B	A	B	A	B	A	A	A	B	A
wsnp_Ex_c2868_5293485	TG32241A	IWA3182	1A.1	7.3		1A	28.92							A	B	A	B	B	A	B	A	A	A	A	A	B	A	B	A	A	A	A	B	A	A	H	B	B	A	B	A	B	A	B	A	A	A	B	A
Kukri_rep_c102231_265	TG41191A	IWB48747	1A.1	7.3		1A	22.23							A	B	A	B	B	A	B	A	A	A	A	A	B	A	B	A	A	A	A	B	A	A	H	B	B	A	B	A	B	A	B	A	A	A	B	A
BS00056550_51	TG25081A	IWB8696	1A.1	9.5		1A	20.98	1A	14.9					A	B	A	B	B	A	B	A	B	A	A	A	B	A	B	A	A	A	A	B	A	A	B	B	B	A	B	A	B	A	B	A	A	A	B	A
wsnp_CAP11_c710_458019	TG44541A	IWA803	1A.1	10.6		1A	27.99							A	B	A	B	B	A	B	A	B	A	A	A	B	A	B	A	A	B	A	B	A	A	B	B	B	A	B	A	B	A	B	A	A	A	B	A
Ku_c4823_673	TG40111A	IWB39517	1A.1	34.7		1A	56.37	1A	26.1	1A	206.91			A	B	B	B	A	A	B	A	B	A	B	A	B	A	B	B	A	B	A	B	A	A	B	B	B	A	A	A	A	A	B	A	A	B	B	A
wsnp_Ex_c7252_12453079	TG13381A	IWA4644	1A.1	35.8		1A	57.43							A	B	B	B	A	A	B	A	A	A	B	A	B	A	B	B	A	B	A	B	A	A	B	B	B	A	A	A	A	A	B	A	A	B	B	A
wsnp_Ex_c1137_2182795	TG09991A	IWA1479	1A.1	35.8		1A	56.37	1A	26.1	1A	193.98	1A	18.9187	A	B	B	B	A	A	B	A	A	A	B	A	B	A	B	B	A	B	A	B	A	A	B	B	B	A	A	A	A	A	B	A	A	B	B	A
wsnp_Ex_c19717_28713417	TG3204	IWA2452	1A.1	35.8		1A	57.43							A	B	B	B	A	A	B	A	A	A	B	A	B	A	B	B	A	B	A	B	A	A	B	B	B	A	A	A	A	A	B	A	A	B	B	A
Tdurum_contig42479_3800	TG30921A	IWB71175	1A.1	36.3		1A	59.83			1A	193.98			A	B	B	B	A	A	B	A	A	A	B	A	B	A	B	B	A	B	A	B	A	A	B	B	B	A	A	A	A	A	B	A	A	B	B	A
wsnp_Ex_c7965_13520238	TG32701D	IWA4754	1A.1	36.9		1A	62.13	1A	26.1	1A	206.91			A	B	B	B	A	A	B	A	A	A	B	A	B	A	B	B	A	B	A	B	A	A	B	B	B	A	A	A	A	A	B	A	A	B	B	A
wsnp_Ku_c5756_10191339	TG3337	IWA7191	1A.1	38		1A	54.28	1A	26.1					A	B	B	B	A	A	B	A	A	A	B	A	B	A	B	B	A	B	A	B	A	A	H	B	B	A	A	A	A	A	B	A	A	B	B	A
Excalibur_c25891_1402	TG38412A	IWB24379	1A.1	38.6		1A	62.13	1A	26.1	1A	193.98			A	B	B	B	A	A	B	A	A	A	B	A	B	A	B	B	A	B	A	B	A	A	B	B	B	A	A	A	A	A	B	A	A	B	B	A
Tdurum_contig50845_82	TG43871A	IWB72128	1A.1	38.6		1A	65.31							A	B	B	B	A	A	B	A	A	A	B	A	B	A	B	B	A	B	A	B	A	A	B	B	B	A	A	A	A	A	B	A	A	B	B	A
RFL_Contig1118_1073	TG42941A	IWB63564	1A.1	39.1		1A	68.32					1A	21.8031	A	B	B	B	A	A	B	A	A	A	B	A	B	A	B	B	A	B	A	B	A	A	B	B	B	A	A	A	A	A	B	A	A	B	B	A
Tdurum_contig29484_628	TG43621B	IWB69805	1A.1	39.7		1A	68.28							A	B	B	B	A	A	B	A	A	A	B	A	B	A	B	B	A	B	A	A	A	A	B	B	B	A	A	A	A	A	B	A	A	B	B	A
wsnp_Ex_c64327_63176640	TG32611A	IWA4506	1A.1	49.3		1A	82.05	1A	36.9					A	B	B	B	A	B	B	A	B	A	B	A	B	A	B	B	A	B	A	A	A	A	B	B	B	A	A	A	A	A	B	A	A	B	B	A
wsnp_Ex_c10783_17554146	TG09951A	IWA1387	1A.1	55.5		1A	85.98							A	B	B	B	A	B	B	A	A	A	B	A	B	A	B	B	A	B	A	A	A	A	B	B	B	A	A	A	A	B	B	A	A	B	B	A
CAP7_c4833_141	TG34291A	IWB14137	1A.1	55.5		1A	85.98							A	B	B	B	A	B	B	A	A	A	B	A	B	A	B	B	A	B	A	A	A	A	B	B	B	A	A	A	A	B	B	A	A	B	B	A
BS00078982_51	TG11901A	IWB11044	1A.1	56		1A	84.65	1A	43.8					A	B	B	B	A	B	B	A	A	A	B	A	B	A	B	B	A	B	A	A	A	A	B	B	B	A	A	A	A	B	B	A	A	B	B	A
BS00105601_51	TG15211A	IWB12251	1A.1	56		1A	84.65	1A	44.5					A	B	B	B	A	B	B	A	A	A	B	A	B	A	B	B	A	B	A	A	A	A	B	B	B	A	A	A	A	B	B	A	A	B	B	A
RAC875_c1825_188	TG19171A	IWB54638	1A.1	56		1A	86.75	1A	45.3					A	B	B	B	A	B	B	A	A	A	B	A	B	A	B	B	A	B	A	A	A	A	B	B	B	A	A	A	A	B	B	A	A	B	B	A
wsnp_Ex_c48087_53105842	TG32431A	IWA4008	1A.1	56.6		1A	86.75	1A	45.3					A	B	B	H	A	B	H	A	A	A	B	A	B	A	B	B	A	B	A	A	A	A	-	H	H	A	A	A	A	H	B	A	A	H	B	A
wsnp_Ku_c42878_50516167	TG33321A	IWA7050	1A.1	56.6		1A	85.24	1A	45.3					A	B	B	H	A	B	H	A	A	A	B	A	B	A	B	B	A	B	A	A	A	A	-	H	H	A	A	A	A	H	B	A	A	H	B	A
Kukri_c31964_56	TG40583A	IWB44046	1A.1	59.4		1A	92.58							A	B	B	B	A	B	B	A	A	A	B	A	B	A	B	B	A	B	A	A	A	A	B	B	B	A	A	A	A	B	A	A	B	B	B	A
Tdurum_contig8382_300	TG44131A	IWB73652	1A.1	59.4		1A	92.58							A	B	B	B	A	B	B	A	A	A	B	A	B	A	B	B	A	B	A	A	A	A	B	B	B	A	A	A	A	B	A	A	B	B	B	A
RAC875_c9700_989	TG47977A	IWB61179	1A.1	62.2		1A	115.58							A	B	B	B	A	B	B	A	A	A	B	A	B	A	B	B	A	B	A	A	A	A	B	B	B	A	A	A	A	B	A	B	B	B	B	A
GENE-0002_856	TG16481A	IWB31602	1A.1	62.2		1A	97.74							A	B	B	B	A	B	B	A	A	A	B	A	B	A	B	B	A	B	A	A	A	A	B	B	B	A	A	A	A	B	A	B	B	B	B	A
BS00084022_51	TG37611A	IWB11335	1A.1	62.8		1A	94.32							A	B	B	B	A	B	B	A	B	A	B	A	B	A	B	B	A	B	A	A	A	A	B	B	B	A	A	A	A	B	A	B	B	B	B	A
BobWhite_c4499_153	TG13851A	IWB3419	1A.1	63.3		1A	94.32							A	B	B	B	A	B	B	A	B	A	B	A	B	A	B	B	A	B	A	A	A	A	B	B	B	A	A	A	A	B	A	B	B	B	B	A
Tdurum_contig13946_241	TG20581A	IWB68106	1A.1	65		1A	99.45	1A	48.5	1A	148.835			A	B	B	B	A	B	B	A	B	A	B	A	B	A	B	B	A	B	A	A	A	A	B	B	B	A	A	A	A	B	A	B	B	B	B	A
Ra_c22663_367	TG4141	IWB51485	1A.1	65		1A	102.89	1A	48.5	1A	148.835			A	B	B	B	A	B	B	A	B	A	B	A	B	A	B	B	A	B	A	A	A	A	B	B	B	A	A	A	A	B	A	B	B	B	B	A
RAC875_c10090_963	TG01051A	IWB52903	1A.1	66.1		1A	103.48	1A	48.5	1A	146.844	1A	44.6243	A	B	B	B	A	B	B	A	A	A	B	A	B	A	B	B	A	B	A	A	A	A	B	B	B	A	A	A	A	B	A	B	B	B	B	A
RAC875_c14066_452	TG0728	IWB53853	1A.1	66.1		1A	110.93	1A	48.5	1A	148.168	1A	44.6243	A	B	B	B	A	B	B	A	A	A	B	A	B	A	B	B	A	B	A	A	A	A	B	B	B	A	A	A	A	B	A	B	B	B	B	A
Excalibur_c7237_1084	TG26761A	IWB28622	1A.1	66.1		1A	103.53	1A	48.5			1A	44.6243	A	B	B	B	A	B	B	A	A	A	B	A	B	A	B	B	A	B	A	A	A	A	B	B	B	A	A	A	A	B	A	B	B	B	B	A
Tdurum_contig9199_714	TG09521A	IWB73772	1A.1	66.7		1A	109.1							A	B	B	B	A	B	B	A	A	A	B	A	B	A	B	B	A	B	A	A	A	A	H	B	B	A	A	A	A	B	A	B	B	B	B	A
Ra_c27593_460	TG12671A	IWB51667	1A.1	67.2		1A	109.15							A	B	B	B	A	B	B	A	A	A	B	A	B	A	B	B	A	B	A	A	A	A	H	B	B	A	A	A	A	B	A	B	B	B	B	A
wsnp_Ex_rep_c109742_92411838	TG01811A	IWA5174	1A.1	68.3		1A	197.46	1A	72.1					A	B	B	B	A	B	A	A	A	A	B	A	B	A	B	B	A	B	A	A	A	A	H	B	B	A	A	A	A	B	A	B	B	B	B	A
wsnp_Ku_c21316_31053745	TG23501A	IWA6707	1A.1	68.3		1A	197.73	1A	72.1					A	B	B	B	A	B	A	A	A	A	B	A	B	A	B	B	A	B	A	A	A	A	H	B	B	A	A	A	A	B	A	B	B	B	B	A
tplb0041a22_935	TG31501A	IWB74701	1A.1	68.3		1A	160.75							A	B	B	B	A	B	A	A	A	A	B	A	B	A	B	B	A	B	A	A	A	A	H	B	B	A	A	A	A	B	A	B	B	B	B	A
Excalibur_c7033_159	TG04741A	IWB28550	1A.1	68.9		1A	171.79			1A	123.846			A	B	B	B	A	B	A	A	A	A	B	A	B	A	B	B	A	B	A	A	A	A	B	B	B	A	A	A	A	B	A	B	B	B	B	A
wsnp_Ex_c5216_9235964	TG10601A	IWA4126	1A.1	68.9		1A	171.79			1A	122.547			A	B	B	B	A	B	A	A	A	A	B	A	B	A	B	B	A	B	A	A	A	A	B	B	B	A	A	A	A	B	A	B	B	B	B	A
BS00022698_51	TG14281A	IWB7216	1A.1	68.9		1A	181.13			1A	122.547			A	B	B	B	A	B	A	A	A	A	B	A	B	A	B	B	A	B	A	A	A	A	B	B	B	A	A	A	A	B	A	B	B	B	B	A
RAC875_c94534_75	TG42621A	IWB61100	1A.1	68.9		1A	181.13							A	B	B	B	A	B	A	A	A	A	B	A	B	A	B	B	A	B	A	A	A	A	B	B	B	A	A	A	A	B	A	B	B	B	B	A
GENE-0410_71	TG00611B	IWB31863	1A.1	69.5		1A	192.5							A	B	B	B	A	B	A	A	A	A	B	A	B	A	B	B	A	B	A	A	A	A	-	B	B	A	A	A	A	B	A	B	B	B	B	A
RAC875_c41275_131	TG07731D	IWB57702	1A.1	69.5		1A	163.1			1A	123.846			A	B	B	B	A	B	A	A	A	A	B	A	B	A	B	B	A	B	A	A	A	A	B	B	B	A	A	A	A	B	A	B	B	B	B	A
wsnp_Ex_c5192_9203682	TG10591A	IWA4117	1A.1	69.5		1A	185.87							A	B	B	B	A	B	A	A	A	A	B	A	B	A	B	B	A	B	A	A	A	A	B	B	B	A	A	A	A	B	A	B	B	B	B	A
IACX11338	TG17061D	IWB35691	1A.1	69.5		1A	187.94							A	B	B	B	A	B	A	A	A	A	B	A	B	A	B	B	A	B	A	A	A	A	H	B	B	A	A	A	A	B	A	B	B	B	B	A
Ra_c58315_265	TG28981A	IWB52305	1A.1	69.5		1A	163.1			1A	123.846			A	B	B	B	A	B	A	A	A	A	B	A	B	A	B	B	A	B	A	A	A	A	B	B	B	A	A	A	A	B	A	B	B	B	B	A
wsnp_Ex_c56097_58351893	TG3562	IWA4291	1A.1	69.5		1A	162.11			1A	125.171			A	B	B	B	A	B	A	A	A	A	B	A	B	A	B	B	A	B	A	A	A	A	B	B	B	A	A	A	A	B	A	B	B	B	B	A
IACX4378	TG39761A	IWB35955	1A.1	69.5		1A	181.85			1A	122.547			A	B	B	B	A	B	A	A	A	A	B	A	B	A	B	B	A	B	A	A	A	A	B	B	B	A	A	A	A	B	A	B	B	B	B	A
Excalibur_c59894_97	TG12141A	IWB27914	1A.1	70		1A	140.43							A	B	B	B	A	B	A	A	B	A	B	A	B	A	B	B	A	B	A	A	A	A	B	B	B	A	A	A	A	B	A	B	B	B	B	A
Kukri_c27785_400	TG17861A	IWB43491	1A.1	70		1A	171.04							A	B	B	B	A	B	A	A	B	A	B	A	B	A	B	B	A	B	A	A	A	A	B	B	B	A	A	A	A	B	A	B	B	B	B	A
RAC875_c53185_802	TG19621A	IWB58903	1A.1	70		1A	171.04							A	B	B	B	A	B	A	A	B	A	B	A	B	A	B	B	A	B	A	A	A	A	B	B	B	A	A	A	A	B	A	B	B	B	B	A
wsnp_Ex_c25734_34995416	TG22531A	IWA2995	1A.1	70		1A	163.1			1A	123.846			A	B	B	B	A	B	A	A	B	A	B	A	B	A	B	B	A	B	A	A	A	A	B	B	B	A	A	A	A	B	A	B	B	B	B	A
IACX18883	TG27671A	IWB35810	1A.1	70		1A	140.43							A	B	B	B	A	B	A	A	B	A	B	A	B	A	B	B	A	B	A	A	A	A	B	B	B	A	A	A	A	B	A	B	B	B	B	A
RAC875_c31276_1128	TG29411A	IWB56592	1A.1	70		1A	186.85							A	B	B	B	A	B	A	A	B	A	B	A	B	A	B	B	A	B	A	A	A	A	B	B	B	A	A	A	A	B	A	B	B	B	B	A
RFL_Contig3203_1971	TG35161A	IWB64265	1A.1	70		1A	181.13							A	B	B	B	A	B	A	A	B	A	B	A	B	A	B	B	A	B	A	A	A	A	B	B	B	A	A	A	A	B	A	B	B	B	B	A
Ku_c1571_1457	TG40001A	IWB38496	1A.1	70		1A	171.29							A	B	B	B	A	B	A	A	B	A	B	A	B	A	B	B	A	B	A	A	A	A	B	B	B	A	A	A	A	B	A	B	B	B	B	A
RAC875_c2734_135	TG4192	IWB56058	1A.1	70		1A	171.04			1A	122.547			A	B	B	B	A	B	A	A	B	A	B	A	B	A	B	B	A	B	A	A	A	A	B	B	B	A	A	A	A	B	A	B	B	B	B	A
BobWhite_rep_c49207_243	TG13931A	IWB4741	1A.1	70		1A	168.94			1A	123.846			A	B	B	B	A	B	A	A	B	A	B	A	B	A	B	B	A	B	A	A	A	A	B	B	B	A	A	A	A	B	A	B	B	B	B	A
wsnp_Ku_c557_1166684	TG2375	IWA7173	1A.1	70		1A	162.11							A	B	B	B	A	B	A	A	B	A	B	A	B	A	B	B	A	B	A	A	A	A	B	B	B	A	A	A	A	B	A	B	B	B	B	A
Ex_c8514_1342	TG15531A	IWB21382	1A.1	70.6		1A	163.1			1A	123.846			A	B	B	B	A	B	A	A	B	A	B	A	B	A	B	B	A	B	A	A	A	A	B	B	B	A	A	A	A	B	A	B	B	B	B	A
BS00067421_51	TG00231A	IWB10043	1A.1	70.6		1A	171.79			1A	122.547			A	B	B	B	A	B	A	A	B	A	B	A	B	A	B	B	A	B	A	A	A	A	B	B	B	A	A	A	A	B	A	B	B	B	B	A
IACX3496	TG00701A	IWB35927	1A.1	70.6		1A	163.1			1A	123.846			A	B	B	B	A	B	A	A	B	A	B	A	B	A	B	B	A	B	A	A	A	A	B	B	B	A	A	A	A	B	A	B	B	B	B	A
GENE-0112_64	TG05081D	IWB31675	1A.1	70.6		1A	162.11							A	B	B	B	A	B	A	A	B	A	B	A	B	A	B	B	A	B	A	A	A	A	B	B	B	A	A	A	A	B	A	B	B	B	B	A
Ku_c23960_333	TG17391A	IWB38877	1A.1	70.6		1A	141.6	1A	65.9			1A	95.781	A	B	B	B	A	B	A	A	B	A	B	A	B	A	B	B	A	B	A	A	A	A	B	B	B	A	A	A	A	B	A	B	B	B	B	A
wsnp_Ex_rep_c66846_65240088	TG23171A	IWA5310	1A.1	70.6		1A	152.74	1A	65.9					A	B	B	B	A	B	A	A	B	A	B	A	B	A	B	B	A	B	A	A	A	A	B	B	B	A	A	A	A	B	A	B	B	B	B	A
Ex_c12584_2014	TG25941A	IWB19752	1A.1	70.6		1A	141.6	1A	65.9					A	B	B	B	A	B	A	A	B	A	B	A	B	A	B	B	A	B	A	A	A	A	B	B	B	A	A	A	A	B	A	B	B	B	B	A
Ex_c25689_1606	TG25981A	IWB20307	1A.1	70.6		1A	141.6	1A	65.9					A	B	B	B	A	B	A	A	B	A	B	A	B	A	B	B	A	B	A	A	A	A	B	B	B	A	A	A	A	B	A	B	B	B	B	A
Excalibur_c10167_1028	TG2605	IWB21564	1A.1	70.6		1A	171.79	1A	69.1					A	B	B	B	A	B	A	A	B	A	B	A	B	A	B	B	A	B	A	A	A	A	B	B	B	A	A	A	A	B	A	B	B	B	B	A
GENE-0004_635	TG27051B	IWB31604	1A.1	70.6		1A	181.13							A	B	B	B	A	B	A	A	B	A	B	A	B	A	B	B	A	B	A	A	A	A	B	B	B	A	A	A	A	B	A	B	B	B	B	A
Kukri_c3582_87	TG28401A	IWB44485	1A.1	70.6		1A	163.8							A	B	B	B	A	B	A	A	B	A	B	A	B	A	B	B	A	B	A	A	A	A	B	B	B	A	A	A	A	B	A	B	B	B	B	A
RAC875_c25507_551	TG2931	IWB55805	1A.1	70.6		1A	163.8	1A	69.1					A	B	B	B	A	B	A	A	B	A	B	A	B	A	B	B	A	B	A	A	A	A	B	B	B	A	A	A	A	B	A	B	B	B	B	A
wsnp_Ex_c10257_16825240	TG31781A	IWA1307	1A.1	70.6		1A	141.6	1A	65.9			1A	95.4416	A	B	B	B	A	B	A	A	B	A	B	A	B	A	B	B	A	B	A	A	A	A	B	B	B	A	A	A	A	B	A	B	B	B	B	A
wsnp_JD_c13903_13781269	TG33051A	IWA5839	1A.1	70.6		1A	171.79							A	B	B	B	A	B	A	A	B	A	B	A	B	A	B	B	A	B	A	A	A	A	B	B	B	A	A	A	A	B	A	B	B	B	B	A
wsnp_Ra_c12148_19539667	TG33491D	IWA7577	1A.1	70.6		1A	183.72	1A	69.8					A	B	B	B	A	B	A	A	B	A	B	A	B	A	B	B	A	B	A	A	A	A	B	B	B	A	A	A	A	B	A	B	B	B	B	A
Kukri_c10239_2186	TG34671A	IWB40291	1A.1	70.6		1A	176.27							A	B	B	B	A	B	A	A	B	A	B	A	B	A	B	B	A	B	A	A	A	A	B	B	B	A	A	A	A	B	A	B	B	B	B	A
Kukri_rep_c101946_496	TG41181D	IWB48704	1A.1	70.6		1A	141.6	1A	66.7					A	B	B	B	A	B	A	A	B	A	B	A	B	A	B	B	A	B	A	A	A	A	B	B	B	A	A	A	A	B	A	B	B	B	B	A
RAC875_rep_c104557_1245	TG42671A	IWB61373	1A.1	70.6		1A	141.6	1A	65.9					A	B	B	B	A	B	A	A	B	A	B	A	B	A	B	B	A	B	-	A	A	A	B	B	B	A	A	A	A	B	A	B	B	B	B	A
wsnp_Ra_c7818_13376644	TG48681A	IWA8070	1A.1	70.6		1A	162.32	1A	69.1					A	B	B	B	A	B	A	A	B	A	B	A	B	A	B	B	A	B	A	A	A	A	B	B	B	A	A	A	A	B	A	B	B	B	B	A
RFL_Contig530_2305	TG20191A	IWB64970	1A.1	71.1		1A	141.6	1A	65.9					A	B	B	B	A	B	A	A	B	A	B	A	B	A	B	B	A	B	A	A	A	A	B	B	B	A	A	A	A	B	A	B	B	B	B	A
TA002594-0782	TG3521	IWB65579	1A.1	71.1		1A	140.24	1A	65.9					A	B	B	B	A	B	A	A	B	A	B	A	B	A	B	B	A	B	A	A	A	A	B	B	B	A	A	A	A	B	A	B	B	B	B	A
wsnp_Ex_c572_1138503	TG32561A	IWA4327	1A.1	71.7		1A	158.12	1A	66.7					A	B	B	B	A	B	A	A	A	A	B	A	B	A	B	B	A	B	A	A	A	A	H	B	B	A	A	A	A	B	A	B	B	B	B	A
wsnp_Ex_c572_1138339	TG22861A	IWA4326	1A.1	72.3		1A	158.12							A	B	B	B	A	B	A	A	A	A	B	A	B	A	B	B	A	B	A	A	A	A	H	B	B	A	A	A	A	B	A	B	B	B	B	A
wsnp_Ex_c572_1138770	TG22871A	IWA4328	1A.1	72.3		1A	158.12							A	B	B	B	A	B	A	A	A	A	B	A	B	A	B	B	A	B	A	A	A	A	H	B	B	A	A	A	A	B	A	B	B	B	B	A
IAAV7203	TG27551A	IWB35308	1A.1	72.3		1A	158.12							A	B	B	B	A	B	A	A	A	A	B	A	B	A	B	B	A	B	A	A	A	A	H	B	B	A	A	A	A	B	A	B	B	B	B	A
Ra_c2895_591	TG34901A	IWB51724	1A.1	72.3		1A	158.12							A	B	B	B	A	B	A	A	A	A	B	A	B	A	B	B	A	B	A	A	A	A	H	B	B	A	A	A	A	B	A	B	B	B	B	A
wsnp_Ku_c4018_7333828	TG48611A	IWA7021	1A.1	72.3		1A	157.09							A	B	B	B	A	B	A	A	A	A	B	A	B	A	B	B	A	B	A	A	A	A	H	B	B	A	A	A	A	B	A	B	B	B	B	A
wsnp_Ra_c33025_41968284	TG3583	IWA7871	1A.1	73.4		1A	200.02							A	B	B	B	A	B	A	A	A	A	B	A	B	A	B	B	A	B	A	A	A	A	B	B	B	A	A	A	A	B	A	B	B	B	B	A
RAC875_c24047_284	TG41831A	IWB55587	1A.1	73.4		1A	204.4							A	B	B	B	A	B	A	A	A	A	B	A	B	A	B	B	A	B	A	A	A	A	B	B	B	A	A	A	A	B	A	B	B	B	B	A
RFL_Contig22_387	TG4798	IWB63864	1A.1	73.4		1A	204.4							A	B	B	B	A	B	A	A	A	A	B	A	B	A	B	B	A	B	A	A	A	A	B	B	B	A	A	A	A	B	A	B	B	B	B	A
RAC875_c29540_1109	TG07551A	IWB56353	1A.1	73.9		1A	200.02	1A	72.1					A	B	B	B	A	B	A	A	A	A	B	A	B	A	B	B	A	B	A	A	A	A	H	B	B	A	A	A	A	B	A	B	B	B	B	A
wsnp_BG314157A_Ta_2_1	TG21811A	IWA560	1A.1	74.5		1A	200.52							A	B	B	B	A	B	A	A	B	A	B	A	B	A	B	B	A	B	A	A	A	A	B	B	B	A	A	A	A	B	A	B	B	B	B	A
wsnp_Ku_c15214_23756800	TG46081A	IWA6553	1A.1	74.5		1A	199.87	1A	72.1					A	B	B	B	A	B	A	A	B	A	B	A	B	A	B	B	A	B	A	A	A	A	B	B	B	A	A	A	A	B	A	B	B	B	B	A
Kukri_c13107_100	TG0614	IWB40969	1A.1	75.6		1A	199.74	1A	72.9	1A	106.916			A	B	B	B	A	B	A	A	B	A	B	A	B	A	B	B	A	B	B	A	A	A	B	B	B	A	A	A	A	B	A	B	B	B	B	A
RAC875_c37545_289	TG07681A	IWB57297	1A.1	75.6		1A	205.66			1A	106.916			A	B	B	B	A	B	-	H	B	A	B	A	B	A	B	B	A	B	B	A	A	A	B	B	B	A	A	A	A	B	A	B	B	B	B	A
Kukri_c29039_315	TG17891A	IWB43631	1A.1	75.6		1A	209.5			1A	106.916			A	B	B	B	A	B	A	A	B	A	B	A	B	A	B	B	A	B	B	A	A	A	B	B	B	A	A	A	A	B	A	B	B	B	B	A
Kukri_c39377_286	TG4072	IWB44918	1A.1	75.6		1A	200.02			1A	106.916			A	B	B	B	A	B	A	A	B	A	B	A	B	A	B	B	A	B	B	A	A	A	B	B	B	A	A	A	A	B	A	B	B	B	B	A
TA003063-0097	TG4320	IWB65643	1A.1	76.2		1A	223.23	1A	75.3					A	B	B	B	A	B	A	A	B	A	B	A	B	A	B	B	A	B	B	A	A	A	B	B	B	A	A	A	A	B	A	B	B	B	B	A
wsnp_CAP12_c1960_972031	TG31701A	IWA931	1A.1	76.7		1A	225.76	1A	75.3					A	B	B	B	A	B	A	A	A	A	B	A	B	A	B	B	A	B	B	A	A	A	H	B	B	A	A	A	A	B	A	B	B	B	B	A
wsnp_Ku_c1642_3232242	TG46131A	IWA6595	1A.1	76.7		1A	213.14	1A	75.3					A	B	B	B	A	B	A	A	A	A	B	A	B	A	B	B	A	B	B	A	A	A	-	B	B	A	A	A	A	B	A	B	B	B	B	A
wsnp_Ku_c10292_17066821	TG46001A	IWA6382	1A.1	76.7		1A	204.21							A	B	B	B	A	B	A	A	A	A	B	A	B	A	B	B	A	B	B	A	A	A	H	B	B	A	A	A	A	B	A	B	B	B	B	A
Ra_c64515_242	TG12691A	IWB52379	1A.1	77.3		1A	234.49	1A	76.9					A	B	B	B	A	B	A	A	A	A	B	A	B	A	B	B	A	B	B	A	A	A	H	B	B	A	A	A	A	B	A	B	B	B	B	A
wsnp_Ex_c1997_3757721	TG22391A	IWA2491	1A.1	77.3		1A	235.04	1A	77.7					A	B	B	B	A	B	A	A	A	A	B	A	B	A	B	B	A	B	B	A	A	A	H	B	B	A	A	A	A	B	A	B	B	B	B	A
wsnp_JD_c6544_7697578	TG33151A	IWA6146	1A.1	77.3		1A	234.64	1A	77.7					A	B	B	B	A	B	A	A	A	A	B	A	B	A	B	B	A	B	B	A	A	A	H	B	B	A	A	A	A	B	A	B	B	B	B	A
Jagger_c5280_407	TG39881A	IWB36631	1A.1	77.3		1A	235.04	1A	77.7					A	B	B	B	A	B	A	A	A	A	B	A	B	A	B	B	A	B	B	A	A	A	H	B	B	A	A	A	A	B	A	B	B	B	B	A
Ku_c10813_1122	TG39981A	IWB38172	1A.1	77.3		1A	234.49	1A	76.9					A	B	B	B	A	B	A	A	A	A	B	A	B	A	B	B	A	B	B	A	A	A	H	B	B	A	A	A	A	B	A	B	B	B	B	A
TA002402-1350	TG4318	IWB65551	1A.1	77.3		1A	228.72	1A	80.8					A	B	B	B	A	B	A	A	A	A	B	A	B	A	B	B	A	B	B	A	A	A	H	B	B	A	A	A	A	B	A	B	B	B	B	A
Kukri_c1313_1158	TG00811A	IWB40975	1A.1	77.8		1A	233.18							A	B	B	B	A	B	A	A	A	A	B	A	B	A	B	B	A	B	B	A	A	A	H	B	B	A	A	A	A	B	A	B	B	B	B	A
Ku_c1313_1673	TG3999	IWB38369	1A.1	77.8		1A	233.18							A	B	B	B	A	B	A	A	A	A	B	A	B	A	B	B	A	B	B	A	A	A	H	B	B	A	A	A	A	B	A	B	B	B	B	A
Kukri_c54678_88	TG18251A	IWB46448	1A.1	79		1A	233.64	1A	76.1			1A	125.983	A	B	B	B	A	B	A	A	B	A	B	A	B	A	B	B	A	B	B	A	A	A	B	B	B	A	A	A	A	B	A	B	B	B	B	A
wsnp_Ex_c32590_41222878	TG45191A	IWA3406	1A.1	79		1A	227.77	1A	76.1			1A	125.05	A	B	B	B	A	B	A	A	B	A	B	A	B	A	B	B	A	B	B	A	A	A	B	B	B	A	A	A	A	B	A	B	B	B	B	A
wsnp_Ex_c1997_3755945	TG01621A	IWA2484	1A.1	79.5		1A	235.45	1A	77.7			1A	127.765	A	B	B	B	A	B	A	A	B	A	B	A	B	A	B	B	A	B	B	A	A	A	B	B	B	A	A	A	A	B	A	B	B	B	B	A
wsnp_Ex_c1997_3757415	TG32071A	IWA2488	1A.1	79.5		1A	235.45					1A	127.765	A	B	B	B	A	B	A	A	B	A	B	A	B	A	B	B	A	B	B	A	A	A	B	B	B	A	A	A	A	B	A	B	B	B	B	A
wsnp_Ku_c5210_9289260	TG23721A	IWA7144	1A.1	80.6		1A	248.41							A	B	B	B	A	B	A	A	B	A	B	A	B	A	B	B	A	B	B	A	A	A	B	B	B	A	A	A	A	B	A	B	B	B	B	A
Excalibur_c49946_169	TG16181A	IWB27098	1A.1	81.2		1A	243.3							A	B	B	B	A	B	A	A	B	A	B	A	B	A	B	B	A	B	B	A	A	A	B	B	B	A	A	A	A	B	A	B	B	B	B	A
wsnp_Ex_c3145_5812670	TG22631A	IWA3340	1A.1	81.2		1A	250.16	1A	89.2					A	B	B	B	A	B	A	A	B	A	B	A	B	A	B	B	A	B	B	A	A	A	B	B	B	A	A	A	A	B	A	B	B	B	B	A
wsnp_JD_c7581_8666052	TG23351A	IWA6176	1A.1	81.8		1A	253.92	1A	90					A	B	B	B	A	B	A	A	B	A	B	A	B	A	B	B	B	B	B	A	A	A	B	B	B	A	A	A	A	B	A	B	B	B	B	A
wsnp_Ex_c4685_8377545	TG32411A	IWA3980	1A.1	81.8		1A	251.63	1A	90					A	B	B	B	A	B	A	A	B	A	B	A	B	A	B	B	B	B	B	A	A	A	B	B	B	A	A	A	A	B	A	B	B	B	B	A
GENE-0527_92	TG05131A	IWB31945	1A.1	81.8		1A	253.22	1A	90					A	B	B	B	A	B	A	A	B	A	B	A	B	A	B	B	B	B	B	A	A	A	B	B	B	A	A	A	A	B	A	B	B	B	B	A
BobWhite_c26122_129	TG36141A	IWB1972	1A.1	82.3		1A	258.92							A	B	B	B	A	B	A	A	B	A	B	A	B	A	B	B	B	B	B	A	A	A	B	B	B	A	A	A	A	B	A	B	B	B	B	A
wsnp_Ku_c33917_43336069	TG46251A	IWA6934	1A.1	82.3		1A	258.88							A	B	B	B	A	B	A	A	B	A	B	A	B	A	B	B	B	B	B	A	A	A	B	B	B	A	A	A	A	B	A	B	B	B	B	A
Excalibur_c45861_189	TG38651B	IWB26708	1A.1	84.6		1A	262.25							A	B	B	B	A	B	A	A	A	A	B	A	B	A	B	B	B	B	B	A	A	A	B	B	B	A	A	A	A	B	A	B	B	B	B	A
GENE-0262_431	TG05101A	IWB31771	1A.1	85.7		1A	268.52	1A	94					A	B	B	B	A	B	A	A	A	A	B	A	B	A	B	B	B	B	B	A	A	A	H	B	B	A	A	A	A	B	A	B	B	B	B	A
wsnp_BG606986A_Ta_2_1	TG13181A	IWA577	1A.1	85.7		1A	262.56							A	B	B	B	A	B	A	A	A	A	B	A	B	A	B	B	B	B	B	A	A	A	H	B	B	A	A	A	A	B	A	B	B	B	B	A
BS00109991_51	TG15251A	IWB12454	1A.1	85.7		1A	268.52	1A	94					A	B	B	B	A	B	A	A	A	A	B	A	B	A	B	B	B	B	B	A	A	A	H	B	B	A	A	A	A	B	A	B	B	B	B	A
BS00022261_51	TG24701A	IWB6995	1A.1	85.7		1A	268.52	1A	94					A	B	B	B	A	B	A	A	A	A	B	A	B	A	B	B	B	B	B	A	A	A	H	B	B	A	A	A	A	B	A	B	B	B	B	A
RAC875_c6798_467	TG29771B	IWB60140	1A.1	85.7		1A	268.01	1A	94					A	B	B	B	A	B	A	A	A	A	B	A	B	A	B	B	B	B	B	A	A	A	H	B	B	A	A	A	A	B	A	B	B	B	B	A
BS00022396_51	TG36771A	IWB7058	1A.1	85.7		1A	262.45							A	B	B	B	A	B	A	A	A	A	B	A	B	A	B	B	B	B	B	A	A	A	H	B	B	A	A	A	A	B	A	B	B	B	B	A
BS00110627_51	TG47121A	IWB12579	1A.1	85.7		1A	268.78	1A	94					A	B	B	B	A	B	A	A	A	A	B	A	B	A	B	B	B	B	B	A	A	A	H	B	B	A	A	A	A	B	A	B	B	B	B	A
wsnp_RFL_Contig3542_3718200	TG11561D	IWA8482	1A.1	87.9		1A	276.05	1A	96.3					A	B	B	B	A	B	A	A	A	A	B	A	B	A	B	B	B	B	B	A	A	A	H	B	B	A	A	A	A	B	A	B	B	B	B	A
Tdurum_contig21114_255	TG13001A	IWB68917	1A.1	87.9		1A	272.34	1A	96.3					A	B	B	B	A	B	A	A	A	A	B	A	B	A	B	B	B	B	B	A	A	A	H	B	B	A	A	A	A	B	A	B	B	B	B	A
BobWhite_c23632_322	TG3609	IWB1728	1A.1	87.9		1A	271.83	1A	95.5					A	B	B	B	A	B	A	A	A	A	B	A	B	A	B	B	B	B	B	A	A	A	H	B	B	A	A	A	A	B	A	B	B	B	B	A
Excalibur_c97157_65	TG16361A	IWB29580	1A.1	88.5		1A	271.33							A	B	B	B	A	B	A	A	B	A	B	A	B	A	B	B	B	B	B	A	A	A	H	B	B	A	A	A	A	B	A	B	B	B	B	A
wsnp_Ex_c33452_41938013	TG10361A	IWA3434	1A.1	89.1		1A	272.98	1A	96.3					A	B	B	B	A	B	A	A	B	A	B	A	B	A	B	B	B	B	B	A	A	A	H	B	B	A	A	A	A	B	A	B	B	B	B	A
IACX5994	TG39791A	IWB36087	1A.1	89.1		1A	272.98	1A	96.3					A	B	B	B	A	B	A	A	B	A	B	A	B	A	B	B	B	B	B	A	A	A	H	B	B	A	A	A	A	B	A	B	B	B	B	A
RAC875_c21411_162	TG4179	IWB55184	1A.1	89.1		1A	272.72	1A	96.3					A	B	B	B	A	B	A	A	B	A	B	A	B	A	B	B	B	B	B	A	A	A	H	B	B	A	A	A	A	B	A	B	B	B	B	A
wsnp_Ex_c33452_41938159	TG45231A	IWA3435	1A.1	89.1		1A	272.98	1A	96.3					A	B	B	B	A	B	A	A	B	A	B	A	B	A	B	B	B	B	B	A	A	A	H	B	B	A	A	A	A	B	A	B	B	B	B	A
wsnp_CAP11_c1815_982483	TG09791A	IWA691	1A.1	92.4		1A	279.26					1A	154.658	A	B	B	B	A	B	A	A	B	A	B	A	B	A	B	B	B	B	B	A	A	A	H	B	B	A	A	A	A	B	A	A	B	B	B	A
BS00078085_51	TG37511A	IWB10986	1A.1	92.4		1A	279.26					1A	155.337	A	B	B	B	A	B	A	A	B	A	B	A	B	A	B	B	B	B	B	A	A	A	H	B	B	A	A	A	A	B	A	A	B	B	B	A
BS00095510_51	TG37741A	IWB11932	1A.1	92.4		1A	279.26					1A	154.658	A	B	B	B	A	B	A	A	B	A	B	A	B	A	B	B	B	B	B	A	A	A	H	B	B	A	A	A	A	B	A	A	B	B	B	A
BobWhite_c41272_159	TG02261A	IWB3160	1A.1	93		1A	278.14	1A	97.1					A	B	B	B	A	B	A	A	B	A	B	A	B	A	B	B	B	B	B	A	A	A	B	B	B	A	A	A	A	B	A	A	B	B	B	A
Tdurum_contig96086_74	TG21361A	IWB73951	1A.1	93		1A	278.14	1A	97.1					A	B	B	B	A	B	A	A	B	A	B	A	B	A	B	B	B	B	B	A	A	A	B	B	B	A	A	A	A	B	A	A	B	B	B	A
wsnp_CAP8_c4785_2322876	TG44591A	IWA1195	1A.1	93.5		1A	280.09							A	B	B	B	A	B	A	A	B	A	B	A	B	A	B	B	B	B	B	A	A	A	B	B	B	A	A	A	A	B	A	A	B	B	B	A
Tdurum_contig81011_244	TG21251A	IWB73482	1A.2	0		1A	344.88							A	B	A	A	B	B	A	A	B	B	A	A	B	A	B	A	B	A	B	A	B	B	A	B	B	A	B	B	B	A	A	A	B	A	B	A
Excalibur_c66_147	TG26731A	IWB28418	1A.2	0		1A	344.88							A	B	A	A	B	B	A	A	B	B	A	A	B	A	B	A	B	A	B	A	B	B	A	B	B	A	B	B	B	A	A	A	B	A	B	A
wsnp_CAP11_c146_160903	TG31681A	IWA672	1A.2	0		1A	321.85							A	B	A	A	B	B	A	A	B	B	A	A	B	A	B	A	B	A	B	A	B	B	A	B	B	A	B	B	B	A	A	A	B	A	B	A
wsnp_Ex_c10631_17340809	TG31811A	IWA1368	1A.2	1.1		1A	359.94							A	B	A	A	B	B	A	A	B	B	A	A	B	A	B	A	B	A	B	A	B	B	A	B	B	A	B	B	B	A	A	A	B	A	B	A
RAC875_c53725_217	TG0791	IWB58979	1A.2	4.5		1A	376.36							A	B	A	A	B	B	A	A	B	B	A	A	B	A	B	A	B	A	B	A	B	B	H	B	B	A	B	B	B	A	A	A	B	A	B	A
wsnp_Ex_c9343_15514531	TG10771A	IWA4897	1A.2	4.5		1A	375.85							A	B	A	A	B	B	A	A	B	B	A	A	B	A	B	A	B	A	B	A	B	B	H	B	B	A	B	B	B	A	A	A	B	A	B	A
wsnp_Ex_c9343_15514687	TG35701A	IWA4898	1A.2	4.5		1A	375.85							A	B	A	A	B	B	A	A	B	B	A	A	B	A	B	A	B	A	B	A	B	B	H	B	B	A	B	B	B	A	A	A	B	A	B	A
BS00065170_51	TG37341A	IWB9474	1A.2	5.6		1A	380.83					1A	206.833	A	B	A	A	B	B	A	A	A	B	A	A	B	A	B	A	B	A	B	A	B	B	H	B	B	A	B	B	A	A	A	A	B	A	B	A
IAAV1930	TG1680	IWB34474	1A.2	6.2		1A	384.81					1A	206.833	A	B	A	A	B	B	A	A	A	B	A	A	B	A	B	A	B	A	B	A	B	B	H	B	B	A	B	B	A	A	A	A	B	A	B	A
wsnp_Ex_c15377_23637176	TG22211A	IWA2015	1A.2	6.2		1A	382.08							A	B	A	A	B	B	A	A	A	B	A	-	B	A	B	-	B	A	B	A	B	B	H	B	B	A	B	B	A	A	A	A	B	A	B	A
IAAV6100	TG27481A	IWB35143	1A.2	6.2		1A	382.47					1A	206.833	A	B	A	A	B	B	A	A	A	B	A	A	B	A	B	A	B	A	B	A	B	B	H	B	B	A	B	B	A	A	A	A	B	A	B	A
RAC875_rep_c71278_345	TG12911A	IWB62774	1A.2	7.3		1A	384.81							A	B	A	A	B	B	A	A	B	B	A	A	B	A	B	A	B	A	B	A	B	B	H	B	B	A	B	B	A	A	A	A	B	A	B	A
GENE-0543_1074	TG0514	IWB31955	1A.2	9		1A	398.08					1A	208.105	A	B	A	A	B	B	A	B	B	B	A	A	B	A	B	A	B	A	B	A	B	B	A	B	B	A	B	B	A	A	A	A	B	A	B	A
Tdurum_contig11349_810	TG0894	IWB67027	1A.2	9		1A	397.71					1A	208.105	A	B	A	A	B	B	A	B	B	B	A	A	B	A	B	A	B	A	B	A	B	B	A	B	B	A	B	B	A	A	A	A	B	A	B	A
Excalibur_c12932_2102	TG2611	IWB22174	1A.2	9		1A	398.08					1A	208.105	A	B	A	A	B	B	A	B	B	B	A	A	B	A	B	A	B	A	B	A	B	B	A	B	B	A	B	B	A	A	A	A	B	A	B	A
Kukri_c4204_1673	TG2850	IWB45183	1A.2	9		1A	398.08					1A	223.8	A	B	A	A	B	B	A	B	B	B	A	A	B	A	B	A	B	A	B	A	B	B	A	B	B	A	B	B	A	A	A	A	B	A	B	A
Excalibur_c46365_304	TG3867	IWB26765	1A.2	9		1A	397.71					1A	208.105	A	B	A	A	B	B	A	B	B	B	A	A	B	A	B	A	B	A	B	A	B	B	A	B	B	A	B	B	A	A	A	A	B	A	B	A
BS00070695_51	TG03461A	IWB10491	1A.2	9.6		1A	404.15					1A	208.105	A	B	A	A	B	B	A	A	B	B	A	A	B	A	B	A	B	A	B	A	B	B	A	B	B	A	B	B	A	A	A	A	B	A	B	A
BS00070991_51	TG03471A	IWB10518	1A.2	9.6		1A	404.15					1A	208.105	A	B	A	A	B	B	A	A	B	B	A	A	B	A	B	A	B	A	B	A	B	B	A	B	B	A	B	B	A	A	A	A	B	A	B	A
BS00062759_51	TG3721	IWB8918	1A.2	10.7		1A	414.38					1A	208.105	A	B	A	A	B	B	A	A	A	B	A	A	B	A	B	A	B	A	B	A	B	B	B	B	B	A	B	B	A	A	A	A	B	A	B	A
IAAV4435	TG2740	IWB34872	1A.2	11.3		1A	418.27							A	B	A	A	B	B	A	B	A	B	A	A	B	A	B	A	B	A	B	A	B	B	A	B	B	A	B	B	A	A	A	A	B	A	B	A
wsnp_Ex_c46670_52108070	TG10551A	IWA3977	1A.2	14.1		1A	428.22							A	B	A	A	B	B	A	B	A	B	A	A	B	A	B	A	B	A	A	A	B	B	A	B	B	A	B	B	A	A	A	A	B	A	A	A
BobWhite_c66315_505	TG1389	IWB4201	1A.2	14.1		1A	415.63							A	B	A	A	B	B	A	B	A	B	A	A	B	A	B	A	B	A	A	A	B	B	A	B	B	A	B	B	A	A	A	A	B	A	A	A
Tdurum_contig70304_781	TG09391B	IWB73167	1B	0		1B	208.53							A	B	B	A	B	B	A	B	A	B	B	A	B	A	B	B	B	B	A	B	B	A	H	A	A	A	B	A	A	A	B	B	B	A	B	A
wsnp_Ku_c4951_8856170	TG11261B	IWA7119	1B	0		1B	208.53							A	B	B	A	B	B	A	B	A	B	B	A	B	A	B	B	B	B	A	B	B	A	H	A	A	A	B	A	A	A	B	B	B	A	B	A
Kukri_rep_c70738_896	TG12621B	IWB50050	1B	0		1B	186.81	1B	41.3					A	B	B	A	B	B	A	B	A	B	B	A	B	A	B	B	B	B	A	B	B	A	A	A	A	A	B	A	A	A	B	B	B	A	B	A
Tdurum_contig53888_350	TG13051B	IWB72330	1B	0		1B	186.81	1B	41.3					A	B	B	A	B	B	A	B	A	B	B	A	B	A	B	B	B	B	A	B	B	A	A	A	A	A	B	A	A	A	B	B	B	A	B	A
BS00041010_51	TG14491B	IWB8257	1B	0		1B	186.81	1B	41.3					A	B	B	A	B	B	A	B	A	B	B	A	B	A	B	B	B	B	A	B	B	A	A	A	A	A	B	A	A	A	B	B	B	A	B	A
JD_c6360_288	TG1729	IWB37703	1B	0		1B	200.06	1B	41.3					A	B	B	A	B	B	A	B	A	B	B	A	B	A	B	B	B	B	A	B	B	A	H	A	A	A	B	A	A	A	B	B	B	A	B	A
wsnp_JD_c4485_5618761	TG23331B	IWA6063	1B	0		1B	208.53							A	B	B	A	B	B	A	B	A	B	B	A	B	A	B	B	B	B	A	B	B	A	H	A	A	A	B	A	A	A	B	B	B	A	B	A
BS00029345_51	TG24871B	IWB7716	1B	0		1B	186.81	1B	41.3					A	B	B	A	B	B	A	B	A	B	B	A	B	A	B	B	B	B	A	B	B	A	A	A	A	A	B	A	A	A	B	B	B	A	B	A
CAP7_c302_518	TG25781B	IWB13980	1B	0		1B	197.22							A	B	B	A	B	B	A	B	A	B	B	A	B	A	B	B	B	B	H	B	B	A	A	A	A	A	B	A	A	A	B	B	B	A	B	A
Excalibur_c29127_552	TG26391B	IWB24798	1B	0		1B	199.82	1B	41.3					A	B	B	A	B	B	A	B	A	B	B	A	B	A	B	B	B	B	H	B	B	A	H	A	A	A	B	A	A	A	B	B	B	A	B	A
RAC875_rep_c98040_163	TG3017	IWB63364	1B	0		1B	243.13							A	B	B	A	B	B	A	B	A	B	B	A	B	A	B	B	B	B	A	B	B	A	H	A	A	A	B	A	A	A	B	B	B	A	B	A
wsnp_Ex_rep_c67036_65492436	TG32871B	IWA5348	1B	0		1B	249.62							A	B	B	A	B	B	A	B	A	B	B	A	B	A	B	B	B	B	A	B	B	A	H	A	A	A	B	A	A	A	B	B	B	A	B	A
wsnp_Ra_c8484_14372772	TG33601B	IWA8081	1B	0		1B	249.62							A	B	B	A	B	B	A	B	A	B	B	A	B	A	B	B	B	B	A	B	B	A	H	A	A	A	B	A	A	A	B	B	B	A	B	A
BS00052089_51	TG33991B	IWB8612	1B	0		1B	197.22	1B	41.3					A	B	B	A	B	B	A	B	A	B	B	A	B	A	B	B	B	B	A	B	B	A	A	A	A	A	B	A	A	A	B	B	B	A	B	A
tplb0023b14_704	TG35461B	IWB74145	1B	0		1B	249.62							A	B	B	A	B	B	A	B	A	B	B	A	B	A	B	B	B	B	A	B	B	A	H	A	A	A	B	A	A	A	B	B	B	A	B	A
BobWhite_c1318_691	TG35941A	IWB461	1B	0		1B	197.88	1B	41.3					A	B	B	A	B	B	A	B	A	B	B	A	B	A	B	B	B	B	H	B	B	A	A	A	A	A	B	A	A	A	B	B	B	A	B	A
RAC875_c10497_231	TG41571D	IWB53084	1B	0		1B	240.79							A	B	B	A	B	B	A	B	A	B	B	A	B	A	B	B	B	B	A	B	B	A	H	A	A	A	B	A	A	A	B	B	B	A	B	A
RFL_Contig5706_1294	TG43111A	IWB65091	1B	0		1B	208.53							A	B	B	A	B	B	A	B	A	B	B	A	B	A	B	B	B	B	H	B	B	A	H	A	A	A	B	A	A	A	B	B	B	A	B	A
Tdurum_contig84184_124	TG44141B	IWB73662	1B	0		1B	186.81	1B	41.3					A	B	B	A	B	B	A	B	A	B	B	A	B	A	B	B	B	B	A	B	B	A	A	A	A	A	B	A	A	A	B	B	B	A	B	A
wsnp_Ex_c17452_26163465	TG44831A	IWA2221	1B	0		1B	249.62							A	B	B	A	B	B	A	B	A	B	B	A	B	A	B	B	B	B	A	B	B	A	H	A	A	A	B	A	A	A	B	B	B	A	B	A
wsnp_Ra_c8484_14372815	TG46561A	IWA8082	1B	0		1B	207.97	1B	42.9					A	B	B	A	B	B	A	B	A	B	B	A	B	A	B	B	B	B	A	B	B	A	H	A	A	A	B	A	A	A	B	B	B	A	B	A
wsnp_Ex_c26419_35667216	TG32201B	IWA3048	1B	0.6		1B	186.81	1B	41.3					A	B	B	A	B	B	A	B	A	B	B	A	B	A	B	B	B	B	A	B	B	A	A	A	A	A	B	A	A	A	B	B	B	A	B	A
BS00011712_51	TG00111A	IWB6458	1B	0.6		1B	199.08	1B	41.3					A	B	B	A	B	B	A	B	A	B	B	A	B	A	B	B	B	B	H	B	B	A	H	A	A	A	B	A	A	A	B	B	B	A	B	A
BS00070139_51	TG00261B	IWB10444	1B	0.6		1B	201.44	1B	41.3					A	B	B	A	B	B	A	B	A	B	B	A	B	A	B	B	B	B	H	B	B	A	H	A	A	A	B	A	A	A	B	B	B	A	B	A
BS00078228_51	TG00291B	IWB10997	1B	0.6		1B	203.66	1B	41.3					A	B	B	A	B	B	A	B	A	B	B	A	B	A	B	B	B	B	A	B	B	A	H	A	A	A	B	A	A	A	B	B	B	A	B	A
Excalibur_c59016_839	TG04681B	IWB27852	1B	0.6		1B	201.44	1B	41.3					A	B	B	A	B	B	A	B	A	B	B	A	B	A	B	B	B	B	H	B	B	A	H	A	A	A	B	A	A	A	B	B	B	A	B	A
GENE-0193_197	TG05091B	IWB31732	1B	0.6		1B	173.72	1B	41.3					A	B	B	A	B	B	A	B	A	B	B	A	B	A	B	B	B	B	A	B	B	A	A	A	A	A	B	A	A	A	B	B	B	A	B	A
IAAV178	TG0539	IWB34448	1B	0.6		1B	173.72	1B	41.3					A	B	B	A	B	B	A	B	A	B	B	A	B	A	B	B	B	B	H	B	B	A	A	A	A	A	B	A	A	A	B	B	B	A	B	A
RAC875_c5796_424	TG07981B	IWB59327	1B	0.6		1B	201.44	1B	41.3					A	B	B	A	B	B	A	B	A	B	B	A	B	A	B	B	B	B	H	B	B	A	H	A	A	A	B	A	A	A	B	B	B	A	B	A
Tdurum_contig43910_687	TG09141B	IWB71459	1B	0.6		1B	198.29							A	B	B	A	B	B	A	B	A	B	B	A	B	A	B	B	B	B	A	B	B	A	H	A	A	A	B	A	A	A	B	B	B	A	B	A
BS00021947_51	TG14181B	IWB6815	1B	0.6		1B	199.08	1B	41.3					A	B	B	A	B	B	A	B	A	B	B	A	B	A	B	B	B	B	A	B	B	A	H	A	A	A	B	A	A	A	B	B	B	A	B	A
BS00033681_51	TG1439	IWB7939	1B	0.6		1B	205.17	1B	41.3					A	B	B	A	B	B	A	B	A	B	B	A	B	A	B	B	B	B	H	B	B	A	H	A	A	A	B	A	A	A	B	B	B	A	B	A
BS00052075_51	TG14571B	IWB8611	1B	0.6		1B	197.22	1B	41.3					A	B	B	A	B	B	A	B	A	B	B	A	B	A	B	B	B	B	H	B	B	A	A	A	A	A	B	A	A	A	B	B	B	A	B	A
IACX2701	TG17101B	IWB35871	1B	0.6		1B	200.78	1B	41.3					A	B	B	A	B	B	A	B	A	B	B	A	B	A	B	B	B	B	H	B	B	A	H	A	A	A	B	A	A	A	B	B	B	A	B	A
Ku_c13515_171	TG17341A	IWB38394	1B	0.6		1B	199.08	1B	41.3					A	B	B	A	B	B	A	B	A	B	B	A	B	A	B	B	B	B	H	B	B	A	H	A	A	A	B	A	A	A	B	B	B	A	B	A
tplb0058h11_348	TG21621B	IWB75173	1B	0.6		1B	201.44	1B	41.3					A	B	B	A	B	B	A	B	A	B	B	A	B	A	B	B	B	B	A	B	B	A	H	A	A	A	B	A	A	A	B	B	B	A	B	A
wsnp_Ex_c1495_2864718	TG22201B	IWA1959	1B	0.6		1B	230.57							A	B	B	A	B	B	A	B	A	B	B	A	B	A	B	B	B	B	A	B	B	A	H	A	A	A	B	A	A	A	B	B	B	A	B	A
BS00022089_51	TG24661B	IWB6900	1B	0.6		1B	203.66	1B	41.3					A	B	B	A	B	B	A	B	A	B	B	A	B	A	B	B	B	B	H	B	B	A	H	A	A	A	B	A	A	A	B	B	B	A	B	A
BS00071083_51	TG25371B	IWB10524	1B	0.6		1B	201.44							A	B	B	A	B	B	A	B	A	B	B	A	B	A	B	B	B	B	A	B	B	A	H	A	A	A	B	A	A	A	B	B	B	A	B	A
BS00075663_51	TG25451B	IWB10823	1B	0.6		1B	201.44	1B	41.3					A	B	B	A	B	B	A	B	A	B	B	A	B	A	B	B	B	B	A	B	B	A	H	A	A	A	B	A	A	A	B	B	B	A	B	A
BS00093841_51	TG25621B	IWB11830	1B	0.6		1B	202.95	1B	41.3					A	B	B	A	B	B	A	B	A	B	B	A	B	A	B	B	B	B	-	B	B	A	H	A	A	A	B	A	A	A	B	B	B	A	B	A
JD_c64600_281	TG27871B	IWB37720	1B	0.6		1B	199.08	1B	41.3					A	B	B	A	B	B	A	B	A	B	B	A	B	A	B	B	B	B	H	B	B	A	H	A	A	A	B	A	A	A	B	B	B	A	B	A
Ra_c25590_1486	TG28921B	IWB51605	1B	0.6		1B	234.54	1B	46					A	B	B	A	B	B	A	B	A	B	B	A	B	A	B	B	B	B	A	B	B	A	H	A	A	A	B	A	A	A	B	B	B	A	B	A
Tdurum_contig46780_203	TG31001B	IWB71717	1B	0.6		1B	197.22							A	B	B	A	B	B	A	B	A	B	B	A	B	A	B	B	B	B	H	B	B	A	A	A	A	A	B	A	A	A	B	B	B	A	B	A
BS00022581_51	TG33911B	IWB7163	1B	0.6		1B	199.82							A	B	B	A	B	B	A	B	A	B	B	A	B	A	B	B	B	B	A	B	B	A	H	A	A	A	B	A	A	A	B	B	B	A	B	A
BS00038929_51	TG37001B	IWB8148	1B	0.6		1B	201.44	1B	41.3					A	B	B	A	B	B	A	B	A	B	B	A	B	A	B	B	B	B	H	B	B	A	H	A	A	A	B	A	A	A	B	B	B	A	B	A
Ku_c42700_2798	TG40091B	IWB39421	1B	0.6		1B	173.72	1B	41.3					A	B	B	A	B	B	A	B	A	B	B	A	B	A	B	B	B	B	A	B	B	A	A	A	A	A	B	A	A	A	B	B	B	A	B	A
Ra_c25590_1406	TG41441B	IWB51604	1B	0.6		1B	230.57							A	B	B	A	B	B	A	B	A	B	B	A	B	A	B	B	B	B	A	B	B	A	H	A	A	A	B	A	A	A	B	B	B	A	B	A
Tdurum_contig60052_184	TG43971B	IWB72708	1B	0.6		1B	244.14	1B	42.9					A	B	B	A	B	B	A	B	A	B	B	A	B	A	B	B	B	B	A	B	B	A	-	A	A	A	B	A	A	A	B	B	B	A	B	A
wsnp_Ku_c24323_34285350	TG46191B	IWA6758	1B	0.6		1B	208.72	1B	42.9					A	B	B	A	B	B	A	B	A	B	B	A	B	A	B	B	B	B	-	B	B	A	H	A	A	A	B	A	A	A	B	B	B	A	B	A
GENE-0136_82	TG47381B	IWB31700	1B	0.6		1B	200.02	1B	41.3					A	B	B	A	B	B	A	B	A	B	B	A	B	A	B	B	B	B	H	B	B	A	H	A	A	A	B	A	A	A	B	B	B	A	B	A
wsnp_Ex_c1600_3051075	TG48341B	IWA2084	1B	0.6		1B	236.93	1B	46					A	B	B	A	B	B	A	B	A	B	B	A	B	A	B	B	B	B	A	B	B	A	H	A	A	A	B	A	A	A	B	B	B	A	B	A
Ra_c23839_884	TG41431B	IWB51549	1B	0.6		1B	186.81	1B	41.3					A	B	B	A	B	B	A	B	A	B	B	A	B	A	B	B	B	B	H	B	B	A	A	A	A	A	B	A	A	A	B	B	B	A	B	A
wsnp_BE442716B_Ta_2_1	TG48261B	IWA106	1B	0.6		1B	199.08	1B	41.3					A	B	B	A	B	B	A	B	A	B	B	A	B	A	B	B	B	B	H	B	B	A	H	A	A	A	B	A	A	A	B	B	B	A	B	A
RAC875_c32894_1038	TG19431A	IWB56778	1B	1.1		1B	201.44	1B	41.3					A	B	B	A	B	B	A	B	A	B	B	A	B	A	B	B	B	B	-	B	B	A	-	A	A	A	B	A	A	A	B	B	B	A	B	A
BS00004903_51	TG11701B	IWB5992	1B	1.7		1A	32.52							A	B	B	A	B	B	A	B	A	B	B	A	B	A	B	B	B	B	A	B	B	A	B	A	A	A	B	A	A	A	B	B	B	A	B	A
Tdurum_contig44861_1253	TG13041B	IWB71554	1B	1.7		1B	159.06			1B	60.2128			A	B	B	A	B	B	A	B	A	B	B	A	B	A	B	B	B	B	A	B	B	A	H	A	A	A	B	A	A	A	B	B	B	A	B	A
GENE-4668_244	TG16747A	IWB34093	1B	1.7		1B	83.41	1B	22.3					A	B	B	A	B	B	A	B	A	B	B	A	B	A	B	B	B	B	A	B	B	A	B	A	A	A	B	A	A	A	B	B	B	A	B	A
RAC875_c51663_87	TG1960	IWB58765	1B	1.7		1B	82	1B	22.3					A	B	B	A	B	B	A	B	A	B	B	A	B	A	B	B	B	B	A	B	B	A	H	A	A	A	B	A	A	A	B	B	B	A	B	A
TA004123-0331	TG3522	IWB65786	1B	1.7		1B	154.59	1B	38.9					A	B	B	A	B	B	A	B	A	B	B	A	B	A	B	B	B	B	A	B	B	A	B	A	A	A	B	A	A	A	B	B	B	A	B	A
BS00022916_51	TG3683	IWB7321	1B	1.7		1B	105.17	1B	38.9					A	B	B	A	B	B	A	B	A	B	B	A	B	A	B	B	B	B	A	B	B	A	B	A	A	A	B	A	A	A	B	B	B	A	B	A
IAAV4194	TG1689	IWB34847	1B	1.7		1B	55.38							A	B	B	A	B	B	A	B	A	B	B	A	B	A	B	B	B	B	A	B	B	A	H	A	A	A	B	A	A	A	B	B	B	A	B	A
BS00068182_51	TG03436B	IWB10252	1B	1.7		1B	54.32							A	B	B	A	B	B	A	B	A	B	B	A	B	A	B	B	B	B	A	B	B	A	H	A	A	A	B	A	A	A	B	B	B	A	B	A
Kukri_c38845_821	TG4070	IWB44849	1B	1.7		1B	160.39							A	B	B	A	B	B	A	B	A	B	B	A	B	A	B	B	B	B	A	B	B	A	H	A	A	A	B	A	A	A	B	B	B	A	B	A
GENE-0227_217	TG00601A	IWB31756	1B	1.7		1B	160.58	1B	41.3			1B	33.8	A	B	B	A	B	B	A	B	A	B	B	A	B	A	B	B	B	B	A	B	B	A	A	A	A	A	B	A	A	A	B	B	B	A	B	A
Ku_c31363_2165	TG12451B	IWB39151	1B	1.7		1B	54.32							A	B	B	A	B	B	A	B	A	B	B	A	B	A	B	B	B	B	A	B	B	A	H	A	A	A	B	A	A	A	B	B	B	A	B	A
tplb0029b01_123	TG13131B	IWB74353	1B	1.7		1B	134.66	1B	41.3			1B	33.8	A	B	B	A	B	B	A	B	A	B	B	A	B	A	B	B	B	B	A	B	B	A	A	A	A	A	B	A	A	A	B	B	B	A	B	A
BS00105833_51	TG1522	IWB12257	1B	1.7		1B	54.32							A	B	B	A	B	B	A	B	A	B	B	A	B	A	B	B	B	B	A	B	B	A	H	A	A	A	B	A	A	A	B	B	B	A	B	A
RAC875_c15942_571	TG19091B	IWB54189	1B	1.7		1B	54.32							A	B	B	A	B	B	A	B	A	B	B	A	B	A	B	B	B	B	A	B	B	A	H	A	A	A	B	A	A	A	B	B	B	A	B	A
tplb0029b01_1022	TG2150	IWB74352	1B	1.7		1B	134.66	1B	41.3			1B	33.8	A	B	B	A	B	B	A	B	A	B	B	A	B	A	B	B	B	B	H	B	B	A	A	A	A	A	B	A	A	A	B	B	B	A	B	A
Excalibur_c95327_51	TG26911A	IWB29508	1B	1.7		1B	74.76							A	B	B	A	B	B	A	B	A	B	B	A	B	A	B	B	B	B	A	B	B	A	H	A	A	A	B	A	A	A	B	B	B	A	B	A
Tdurum_contig47083_278	TG31011B	IWB71754	1B	1.7		1B	49.29							A	B	B	A	B	B	A	B	A	B	B	A	B	A	B	B	B	B	A	B	B	A	H	A	A	A	B	A	A	A	B	B	B	A	B	A
GENE-1756_115	TG34524A	IWB32639	1B	1.7		1B	77.05							A	B	B	A	B	B	A	B	A	B	B	A	B	A	B	B	B	B	A	B	B	A	H	A	A	A	B	A	A	A	B	B	B	A	B	A
Kukri_c44369_131	TG34751B	IWB45437	1B	1.7		1B	13.69					1B_part2	0.8	A	B	B	A	B	B	A	B	A	B	B	A	B	A	B	B	B	B	A	B	B	A	H	A	A	A	B	A	A	A	B	B	B	A	B	A
BobWhite_c4236_410	TG3632	IWB3233	1B	1.7		1B	122.77	1B	41.3			1B	33.8	A	B	B	A	B	B	A	B	A	B	B	A	B	A	B	B	B	B	-	B	B	A	A	A	A	A	B	A	A	A	B	B	B	A	B	A
BS00011450_51	TG36601A	IWB6405	1B	1.7		1B	134.66	1B	41.3			1B	33.8	A	B	B	A	B	B	A	B	A	B	B	A	B	A	B	B	B	B	H	B	B	A	A	A	A	A	B	A	A	A	B	B	B	A	B	A
Excalibur_c10319_229	TG3824	IWB21601	1B	1.7		1B	122.77	1B	41.3			1B	33.8	A	B	B	A	B	B	A	B	A	B	B	A	B	A	B	B	B	B	-	B	B	A	A	A	A	A	B	A	A	A	B	B	B	A	B	A
GENE-3569_500	TG39341A	IWB33468	1B	1.7		1B	54.32							A	B	B	A	B	B	A	B	A	B	B	A	B	A	B	B	B	B	A	B	B	A	H	A	A	A	B	A	A	A	B	B	B	A	B	A
RAC875_c113582_346	TG41581B	IWB53314	1B	1.7		1B	54.32							A	B	B	A	B	B	A	B	A	B	B	A	B	A	B	B	B	B	A	B	B	A	H	A	A	A	B	A	A	A	B	B	B	A	B	A
BS00010352_51	TG4675	IWB6209	1B	1.7		1B	160.58	1B	41.3			1B	34.2	A	B	B	A	B	B	A	B	A	B	B	A	B	A	B	B	B	B	H	B	B	A	A	A	A	A	B	A	A	A	B	B	B	A	B	A
BS00074962_51	TG14941B	IWB10772	1B	2.3		1B	65.22							A	B	B	A	B	B	A	B	-	B	B	A	B	A	B	B	B	B	A	B	B	A	H	A	A	A	B	A	A	A	B	B	B	A	B	A
Excalibur_c7954_672	TG04801B	IWB28919	1B	2.3		1B	160.39					1B	41.8	A	B	B	A	B	B	A	B	B	B	B	A	B	A	B	B	B	B	H	B	B	A	H	A	A	A	B	A	A	A	B	B	B	A	B	A
BS00004418_51	TG33821B	IWB5980	1B	2.3		1B	160.39							A	B	B	A	B	B	A	B	B	B	B	A	B	A	B	B	B	B	A	B	B	A	H	A	A	A	B	A	A	A	B	B	B	A	B	A
TA004380-0460	TG3523	IWB65827	1B	2.3		1B	48.43							A	B	B	A	B	B	A	B	B	B	B	A	B	A	B	B	B	B	A	B	B	A	H	A	A	A	B	A	A	A	B	B	B	A	B	A
Tdurum_contig37488_126	TG20751A	IWB70595	1B	2.9		1B	160.39							A	B	B	A	B	B	A	B	B	B	B	A	B	A	B	B	B	B	A	B	B	A	H	A	A	A	B	A	A	A	B	B	B	A	B	A
BS00051105_51	TG03061B	IWB8598	1B	2.9		1B	122.77	1B	39.7					A	B	B	A	B	B	A	B	B	B	B	A	B	A	B	B	B	B	A	B	B	A	H	A	A	A	B	A	A	A	B	B	B	A	B	A
wsnp_Ku_rep_c71900_71624324	TG11361A	IWA7504	1B	2.9		1B	170.93							A	B	B	A	B	B	A	B	B	B	B	A	B	A	B	B	B	B	A	B	B	A	A	A	A	A	B	A	A	A	B	B	B	A	B	A
Excalibur_c89515_95	TG12171B	IWB29275	1B	2.9		1B	125.29	1B	40.5			1B	38.3	A	B	B	A	B	B	A	B	B	B	B	A	B	A	B	B	B	B	A	B	B	A	H	A	A	A	B	A	A	A	B	B	B	A	B	A
RAC875_c90431_275	TG1288	IWB61004	1B	2.9		1B	127.3	1B	40.5			1B	38.3	A	B	B	A	B	B	A	B	B	B	B	A	B	A	B	B	B	B	A	B	B	A	H	A	A	A	B	A	A	A	B	B	B	A	B	A
BS00003575_51	TG14021B	IWB5835	1B	2.9		1B	172.13	1B	39.7					A	B	B	A	B	B	A	B	B	B	B	A	B	A	B	B	B	B	A	B	B	A	H	A	A	A	B	A	A	A	B	B	B	A	B	A
BS00010992_51	TG14061B	IWB6324	1B	2.9		1B	139.7	1B	39.7			1B	38.3	A	B	B	A	B	B	A	B	B	B	B	A	B	A	B	B	B	B	A	B	B	A	-	A	A	A	B	A	A	A	B	B	B	A	B	A
Excalibur_c20610_251	TG15741B	IWB23525	1B	2.9		1B	159.02	1B	40.5					A	B	B	A	B	B	A	B	B	B	B	A	B	A	B	B	B	B	A	B	B	A	H	A	A	A	B	A	A	A	B	B	B	A	B	A
IAAV7575	TG16971B	IWB35366	1B	2.9		1B	159.06	1B	40.5			1B	42.9	A	B	B	A	B	B	A	B	B	B	B	A	B	A	B	B	B	B	A	B	B	A	H	A	A	A	B	A	A	A	B	B	B	A	B	A
Kukri_c19709_383	TG17731B	IWB42184	1B	2.9		1B	159.12							A	B	B	A	B	B	A	B	B	B	B	A	B	A	B	B	B	B	A	B	B	A	-	A	A	A	B	A	A	A	B	B	B	A	B	A
RAC875_c8849_134	TG19841B	IWB60932	1B	2.9		1B	159.32	1B	40.5			1B	38.3	A	B	B	A	B	B	A	B	B	B	B	A	B	A	B	B	B	B	A	B	B	A	H	A	A	A	B	A	A	A	B	B	B	A	B	A
wsnp_Ex_c18733_27607958	TG22301B	IWA2345	1B	2.9		1B	197.88	1B	39.7					A	B	B	A	B	B	A	B	B	B	B	A	B	A	B	B	B	B	A	B	B	A	H	A	A	A	B	A	A	A	B	B	B	A	B	A
Ex_c2725_1442	TG25991B	IWB20364	1B	2.9		1B	159.02	1B	39.7					A	B	B	A	B	B	A	B	B	B	B	A	B	A	B	B	B	B	A	B	B	A	H	A	A	A	B	A	A	A	B	B	B	A	B	A
IAAV2324	TG27321B	IWB34533	1B	2.9		1B	159.06	1B	39.7					A	B	B	A	B	B	A	B	B	B	B	A	B	A	B	B	B	B	A	B	B	A	H	A	A	A	B	A	A	A	B	B	B	A	B	A
IAAV6464	TG27511B	IWB35204	1B	2.9		1B	159.06	1B	40.5					A	B	B	A	B	B	A	B	B	B	B	A	B	A	B	B	B	B	A	B	B	A	-	A	A	A	B	A	A	A	B	B	B	A	B	A
RAC875_c10659_570	TG29041A	IWB53143	1B	2.9		1B	159.12	1B	40.5					A	B	B	A	B	B	A	B	B	B	B	A	B	A	B	B	B	B	A	B	B	A	H	A	A	A	B	A	A	A	B	B	B	A	B	A
RAC875_c28894_526	TG29371B	IWB56246	1B	2.9		1B	159.06	1B	40.5			1B	42.5	A	B	B	A	B	B	A	B	B	B	B	A	B	A	B	B	B	B	A	B	B	A	H	A	A	A	B	A	A	A	B	B	B	A	B	A
RAC875_c79370_378	TG29831B	IWB60559	1B	2.9		1B	158.9	1B	37.4					A	B	B	A	B	B	A	B	B	B	B	A	B	A	B	B	B	B	A	B	B	A	H	A	A	A	B	A	A	A	B	B	B	A	B	A
BS00073034_51	TG37491B	IWB10636	1B	2.9		1B	139.2							A	B	B	A	B	B	A	B	B	B	B	A	B	A	B	B	B	B	A	B	B	A	H	A	A	A	B	A	A	A	B	B	B	A	B	A
BS00105846_51	TG37851B	IWB12258	1B	2.9		1B	72.21	1B	15					A	B	B	A	B	B	A	B	B	B	B	A	B	A	B	B	B	B	A	B	B	A	H	A	A	A	B	A	A	A	B	B	B	A	B	A
Ex_c40520_1484	TG38151B	IWB20653	1B	2.9		1B	123.78	1B	40.5			1B	40.7	A	B	B	A	B	B	A	B	B	B	B	A	B	A	B	B	B	B	A	B	B	A	H	A	A	A	B	A	A	A	B	B	B	A	B	A
Excalibur_rep_c68921_433	TG39091A	IWB31006	1B	2.9		1B	159.43	1B	40.5					A	B	B	A	B	B	A	B	B	B	B	A	B	A	B	B	B	B	A	B	B	A	H	A	A	A	B	A	A	A	B	B	B	A	B	A
IAAV2452	TG39451D	IWB34561	1B	2.9		1B	124.28	1B	40.5					A	B	B	A	B	B	A	B	B	B	B	A	B	A	B	B	B	B	A	B	B	A	H	A	A	A	B	A	A	A	B	B	B	A	B	A
Kukri_c14968_674	TG40291A	IWB41306	1B	2.9		1B	172.49	1B	40.5					A	B	B	A	B	B	A	B	B	B	B	A	B	A	B	B	B	B	A	B	B	A	H	A	A	A	B	A	A	A	B	B	B	A	B	A
IAAV1364	TG47481D	IWB34367	1B	2.9		1B	197.88							A	B	B	A	B	B	A	B	B	B	B	A	B	A	B	B	B	B	A	B	B	A	A	A	A	A	B	A	A	A	B	B	B	A	B	A
Tdurum_contig9874_391	TG4822	IWB74048	1B	2.9		1B	74.76			1B	60.2128			A	B	B	A	B	B	A	B	B	B	B	A	B	A	B	B	B	B	A	B	B	A	H	A	A	A	B	A	A	A	B	B	B	A	B	A
TA001473-0980	TG3050	IWB65404	1B	2.9		1B	170.93	1B	38.9					A	B	B	A	B	B	A	B	B	B	B	A	B	A	B	B	B	B	A	B	B	A	H	A	A	A	B	A	A	A	B	B	B	A	B	A
BS00067706_51	TG0338	IWB10126	1B	2.9		1B	122.77	1B	40.5			1B	42.9	A	B	B	A	B	B	A	B	B	B	B	A	B	A	B	B	B	B	A	B	B	A	-	A	A	A	B	A	A	A	B	B	B	A	B	A
BS00084305_51	TG47041B	IWB11357	1B	3.4		1B	158.9							A	B	B	A	B	B	A	B	B	B	B	A	B	A	B	B	B	B	A	B	B	A	B	A	A	A	B	A	A	A	B	B	B	A	B	A
RAC875_rep_c95066_120	TG0128	IWB63331	1B	3.4										A	B	B	A	B	B	A	B	B	B	B	A	B	A	B	B	B	B	A	B	B	A	B	A	A	A	B	A	A	A	B	B	B	A	B	A
Ku_c11706_149	TG05881B	IWB38258	1B	3.4		1B	159.06					1B	41	A	B	B	A	B	B	A	B	B	B	B	A	B	A	B	B	B	B	A	B	B	A	H	A	A	A	B	A	A	A	B	B	B	A	B	A
Ku_c3695_1696	TG05971B	IWB39306	1B	3.4		1B	160.39					1B	41.8	A	B	B	A	B	B	A	B	B	B	B	A	B	A	B	B	B	B	A	B	B	A	B	A	A	A	B	A	A	A	B	B	B	A	B	A
Kukri_c42522_155	TG06381B	IWB45251	1B	3.4		1B	159.06							A	B	B	A	B	B	A	B	B	B	B	A	B	A	B	B	B	B	A	B	B	A	B	A	A	A	B	A	A	A	B	B	B	A	B	A
Kukri_c67721_184	TG0659	IWB47413	1B	3.4										A	B	B	A	B	B	A	B	B	B	B	A	B	A	B	B	B	B	A	B	B	A	B	A	A	A	B	A	A	A	B	B	B	A	B	A
RAC875_c4910_98	TG07861A	IWB58524	1B	3.4		1B	159.06							A	B	B	A	B	B	A	B	B	B	B	A	B	A	B	B	B	B	A	B	B	A	B	A	A	A	B	A	A	A	B	B	B	A	B	A
BS00064029_51	TG11831A	IWB9174	1B	3.4		1B	160.39							A	B	B	A	B	B	A	B	B	B	B	A	B	A	B	B	B	B	A	B	B	A	H	A	A	A	B	A	A	A	B	B	B	A	B	A
BS00071161_51	TG14881B	IWB10529	1B	3.4		1B	14.19							A	B	B	A	B	B	A	B	B	B	B	A	B	A	B	B	B	B	A	B	B	A	-	A	A	A	B	A	A	A	B	B	B	A	B	A
Tdurum_contig20702_274	TG20631B	IWB68890	1B	3.4		1B	154.59							A	B	B	A	B	B	A	B	B	B	B	A	B	A	B	B	B	B	A	B	B	A	-	A	A	A	B	A	A	A	B	B	B	A	B	A
Tdurum_contig56188_569	TG21081B	IWB72495	1B	3.4		1B	160.39	1B	23					A	B	B	A	B	B	A	B	B	B	B	A	B	A	B	B	B	B	A	B	B	A	H	A	A	A	B	A	A	A	B	B	B	A	B	A
BS00004789_51	TG24491B	IWB5991	1B	3.4		1B	160.39							A	B	B	A	B	B	A	B	B	B	B	A	B	A	B	B	B	B	A	B	B	A	H	A	A	A	B	A	A	A	B	B	B	A	B	A
Excalibur_c17202_1833	TG26191B	IWB22930	1B	3.4		1B	99.39							A	B	B	A	B	B	A	B	B	B	B	A	B	A	B	B	B	B	A	B	B	A	H	A	A	A	B	A	A	A	B	B	B	A	B	A
IAAV1624	TG27281D	IWB34411	1B	3.4		1B	160.39							A	B	B	A	B	B	A	B	B	B	B	A	B	A	B	B	B	B	A	B	B	A	-	A	A	A	B	A	A	A	B	B	B	A	B	A
Kukri_c38845_430	TG28441D	IWB44847	1B	3.4		1B	154.59							A	B	B	A	B	B	A	B	B	B	B	A	B	A	B	B	B	B	A	B	B	A	H	A	A	A	B	A	A	A	B	B	B	A	B	A
Kukri_c51925_654	TG2857	IWB46204	1B	3.4		1B	154.59							A	B	B	A	B	B	A	B	B	B	B	A	B	A	B	B	B	B	A	B	B	A	H	A	A	A	B	A	A	A	B	B	B	A	B	A
RAC875_c47137_112	TG29581B	IWB58317	1B	3.4		1B	157.1					1B	38.3	A	B	B	A	B	B	A	B	B	B	B	A	B	A	B	B	B	B	A	B	B	A	H	A	A	A	B	A	A	A	B	B	B	A	B	A
RAC875_c826_839	TG29851B	IWB60705	1B	3.4		1B	89.39							A	B	B	A	B	B	A	B	B	B	B	A	B	A	B	B	B	B	A	B	B	A	H	A	A	A	B	A	A	A	B	B	B	A	B	A
wsnp_Ku_c3695_6810121	TG33301B	IWA6964	1B	3.4		1B	160.39							A	B	B	A	B	B	A	B	B	B	B	A	B	A	B	B	B	B	A	B	B	A	H	A	A	A	B	A	A	A	B	B	B	A	B	A
BS00005004_51	TG33831B	IWB5995	1B	3.4		1B	74.76							A	B	B	A	B	B	A	B	B	B	B	A	B	A	B	B	B	B	A	B	B	A	H	A	A	A	B	A	A	A	B	B	B	A	B	A
Kukri_rep_c105316_262	TG34851B	IWB49083	1B	3.4		1B	160.39							A	B	B	A	B	B	A	B	B	B	B	A	B	A	B	B	B	B	A	B	B	A	H	A	A	A	B	A	A	A	B	B	B	A	B	A
Tdurum_contig100344_160	TG35251B	IWB66182	1B	3.4		1B	159.06							A	B	B	A	B	B	A	B	B	B	B	A	B	A	B	B	B	B	A	B	B	A	-	A	A	A	B	A	A	A	B	B	B	A	B	A
BS00022180_51	TG36721B	IWB6951	1B	3.4		1B	14.7							A	B	B	A	B	B	A	B	B	B	B	A	B	A	B	B	B	B	-	B	B	A	H	A	A	A	B	A	A	A	B	B	B	A	B	A
BS00087787_51	TG37631B	IWB11526	1B	3.4		1B	160.39							A	B	B	A	B	B	A	B	B	B	B	A	B	A	B	B	B	B	A	B	B	A	H	A	A	A	B	A	A	A	B	B	B	A	B	A
Ex_c64327_523	TG38181A	IWB21039	1B	3.4		1B	160.39							A	B	B	A	B	B	A	B	B	B	B	A	B	A	B	B	B	B	A	B	B	A	H	A	A	A	B	A	A	A	B	B	B	A	B	A
Excalibur_c12376_569	TG3828	IWB22081	1B	3.4		1B	160.39							A	B	B	A	B	B	A	B	B	B	B	A	B	A	B	B	B	B	A	B	B	A	H	A	A	A	B	A	A	A	B	B	B	A	B	A
Kukri_c7_731	TG41021D	IWB47491	1B	3.4		1B	160.39							A	B	B	A	B	B	A	B	B	B	B	A	B	A	B	B	B	B	A	B	B	A	B	A	A	A	B	A	A	A	B	B	B	A	B	A
RAC875_c42715_856	TG42201B	IWB57870	1B	3.4		1B	74.76							A	B	B	A	B	B	A	B	B	B	B	A	B	A	B	B	B	B	A	B	B	A	H	A	A	A	B	A	A	A	B	B	B	A	B	A
RAC875_rep_c77710_180	TG42891B	IWB63115	1B	3.4		1B	160.28							A	B	B	A	B	B	A	B	B	B	B	A	B	A	B	B	B	B	A	B	B	A	-	A	A	A	B	A	A	A	B	B	B	A	B	A
Tdurum_contig42092_281	TG4373	IWB70814	1B	3.4		1B	160.39							A	B	B	A	B	B	A	B	B	B	B	A	B	A	B	B	B	B	A	B	B	A	B	A	A	A	B	A	A	A	B	B	B	A	B	A
TG0025	TG4424		1B	3.4										A	B	B	A	B	B	A	B	B	B	B	A	B	A	B	B	B	B	-	B	B	A	H	A	A	A	B	A	A	A	B	B	B	A	B	A
IAAV7611	TG47571B	IWB35369	1B	3.4		1B	159.06							A	B	B	A	B	B	A	B	B	B	B	A	B	A	B	B	B	B	A	B	B	A	B	A	A	A	B	A	A	A	B	B	B	A	B	A
Ku_c11813_215	TG47681B	IWB38272	1B	3.4		1B	134.16							A	B	B	A	B	B	A	B	B	B	B	A	B	A	B	B	B	B	-	B	B	A	H	A	A	A	B	A	A	A	B	B	B	A	B	A
Kukri_c37212_1286	TG47781A	IWB44655	1B	3.4		1A	30.17							A	B	B	A	B	B	A	B	B	B	B	A	B	A	B	B	B	B	A	B	B	A	H	A	A	A	B	A	A	A	B	B	B	A	B	A
wsnp_Ex_c2117_3976893	TG48371B	IWA2583	1B	3.4		1B	160.39	1B	23					A	B	B	A	B	B	A	B	B	B	B	A	B	A	B	B	B	B	A	B	B	A	H	A	A	A	B	A	A	A	B	B	B	A	B	A
RAC875_c21367_209	TG07441A	IWB55174	1B	3.4		1B	160.39							A	B	B	A	B	B	A	B	B	B	B	A	B	A	B	B	B	B	A	B	B	A	H	A	A	A	B	A	A	A	B	B	B	A	B	A
IAAV1312	TG3940	IWB34356	1B	3.4		1B	154.59							A	B	B	A	B	B	A	B	B	B	B	A	B	A	B	B	B	B	H	B	B	A	H	A	A	A	B	A	A	A	B	B	B	A	B	A
Ku_c13532_1753	TG12431A	IWB38395	1B	3.4		1B	154.59					1B	38.3	A	B	B	A	B	B	A	B	B	B	B	A	B	A	B	B	B	B	A	B	B	A	H	A	A	A	B	A	A	A	B	B	B	A	B	A
JD_c12243_360	TG17241D	IWB36940	1B	3.4		1B	160.58							A	B	B	A	B	B	A	B	B	B	B	A	B	A	B	B	B	B	A	B	B	A	H	A	A	A	B	A	A	A	B	B	B	A	B	A
BS00041355_51	TG1450	IWB8272	1B	4		1B	230.07	1B	45.3					A	B	B	A	B	B	A	B	B	B	B	A	B	A	B	B	B	B	A	B	B	A	H	A	A	A	B	A	A	A	B	B	B	A	B	A
GENE-0107_807	TG16491B	IWB31673	1B	4		1B	227.53							A	B	B	A	B	B	A	B	B	B	B	A	B	A	B	B	B	B	A	B	B	A	H	A	A	A	B	A	A	A	B	B	B	A	B	A
tplb0024i15_1754	TG21421B	IWB74185	1B	4		1B	231.94	1B	45.3					A	B	B	A	B	B	A	B	B	B	B	A	B	A	B	B	B	B	A	B	B	A	A	A	A	A	B	A	A	A	B	B	B	A	B	A
Excalibur_c34625_281	TG26411A	IWB25483	1B	4		1B	241.57							A	B	B	A	B	B	A	B	B	B	B	A	B	A	B	B	B	B	A	B	B	A	H	A	A	A	B	A	A	A	B	B	B	A	B	A
Tdurum_contig13095_97	TG35271A	IWB67856	1B	4.6		1B	160.28							A	B	B	A	B	B	A	B	B	B	B	A	B	A	B	B	B	B	A	B	B	A	A	A	A	A	B	A	A	A	B	B	B	A	B	A
BS00083533_51	TG37591B	IWB11309	1B	4.6		1B	159.06							A	B	B	A	B	B	A	B	B	B	B	A	B	A	B	B	B	B	A	B	B	A	H	A	A	A	B	A	A	A	B	B	B	A	B	A
RAC875_c63067_283	TG19691B	IWB59742	1B	4.6		1B	160.39							A	B	B	A	B	B	A	B	B	B	B	A	B	A	B	B	B	B	A	B	B	A	H	A	A	A	B	A	A	A	B	B	B	A	B	A
Tdurum_contig42092_1047	TG13034D	IWB70811	1B	4.6		1B	160.39							A	B	B	A	B	B	A	B	B	B	B	A	B	A	B	B	B	B	A	B	B	A	H	A	A	A	B	A	A	A	B	B	B	A	B	A
tplb0055p02_1074	TG01521B	IWB75093	1B	4.6		1B	160.39							A	B	B	A	B	B	A	B	B	B	B	A	B	A	B	B	B	B	A	B	B	A	B	A	A	A	B	A	A	A	B	B	B	A	B	A
GENE-0539_113	TG12201D	IWB31952	1B	4.6		1B	160.39							A	B	B	A	B	B	A	B	B	B	B	A	B	A	B	B	B	B	H	B	B	A	H	A	A	A	B	A	A	A	B	B	B	A	B	A
RAC875_c37934_225	TG19491A	IWB57360	1B	4.6		1A	72.7							A	B	B	A	B	B	A	B	B	B	B	A	B	A	B	B	B	B	A	B	B	A	H	A	A	A	B	A	A	A	B	B	B	A	B	A
CAP8_rep_c9642_82	TG25831B	IWB15085	1B	4.6		1B	107.7							A	B	B	A	B	B	A	B	B	B	B	A	B	A	B	B	B	B	A	B	B	A	H	A	A	A	B	A	A	A	B	B	B	A	B	A
BobWhite_c10529_1331	TG2400	IWB73	1B	4.6		1B	160.39							A	B	B	A	B	B	A	B	B	B	B	A	B	A	B	B	B	B	-	B	B	A	H	A	A	A	B	A	A	A	B	B	B	A	B	A
Excalibur_c6154_413	TG3879	IWB28058	1B	4.6		1B	161.52							A	B	B	A	B	B	A	B	B	B	B	A	B	A	B	B	B	B	A	B	B	A	H	A	A	A	B	A	A	A	B	B	B	A	B	A
GENE-0032_895	TG05071A	IWB31623	1B	4.6		1B	159.06							A	B	B	A	B	B	A	B	B	B	B	A	B	A	B	B	B	B	A	B	B	A	-	A	A	A	B	A	A	A	B	B	B	A	B	A
Kukri_c26168_423	TG00851B	IWB43258	1B	4.6		1B	160.39							A	B	B	A	B	B	A	B	B	B	B	A	B	A	B	B	B	B	A	B	B	A	H	A	A	A	B	A	A	A	B	B	B	A	B	A
BobWhite_c13654_447	TG0205	IWB533	1B	4.6		1B	74.76							A	B	B	A	B	B	A	B	B	B	B	A	B	A	B	B	B	B	A	B	B	A	H	A	A	A	B	A	A	A	B	B	B	A	B	A
BS00105606_51	TG03841B	IWB12252	1B	4.6		1B	99.39							A	B	B	A	B	B	A	B	B	B	B	A	B	A	B	B	B	B	A	B	B	A	A	A	A	A	B	A	A	A	B	B	B	A	B	A
Kukri_c2332_1093	TG06241A	IWB42782	1B	4.6		1B	161.52							A	B	B	A	B	B	A	B	B	B	B	A	B	A	B	B	B	B	H	B	B	A	H	A	A	A	B	A	A	A	B	B	B	A	B	A
BS00022590_51	TG24761B	IWB7167	1B	4.6		1B	99.39							A	B	B	A	B	B	A	B	B	B	B	A	B	A	B	B	B	B	A	B	B	A	H	A	A	A	B	A	A	A	B	B	B	A	B	A
Kukri_c34793_360	TG34723A	IWB44363	1B	4.6		1B	84.25	1B	23					A	B	B	A	B	B	A	B	B	B	B	A	B	A	B	B	B	B	A	B	B	A	H	A	A	A	B	A	A	A	B	B	B	A	B	A
Kukri_c29582_126	TG40521B	IWB43742	1B	4.6		1B	159.06					1B	40.7	A	B	B	A	B	B	A	B	B	B	B	A	B	A	B	B	B	B	A	B	B	A	-	A	A	A	B	A	A	A	B	B	B	A	B	A
IAAV2838	TG39491B	IWB34618	1B	5.1		1A	84.25							A	B	B	A	B	B	A	B	B	B	B	A	B	A	B	B	B	B	A	B	B	A	H	A	A	A	B	A	A	A	B	B	B	A	B	A
BS00110104_51	TG0039	IWB12472	1B	5.1		1B	159.32	1B	40.5					A	B	B	A	B	B	A	B	B	B	B	A	B	A	B	B	B	B	A	B	B	A	H	A	A	A	B	A	A	A	B	B	B	A	B	A
BS00022625_51	TG02791B	IWB7186	1B	5.1		1B	172.49	1B	40.5			1A	68.0393	A	B	B	A	B	B	A	B	B	B	B	A	B	A	B	B	B	B	A	B	B	A	H	A	A	A	B	A	A	A	B	B	B	A	B	A
BS00035690_51	TG02961B	IWB8023	1B	5.1		1B	159.12							A	B	B	A	B	B	A	B	B	B	B	A	B	A	B	B	B	B	A	B	B	A	H	A	A	A	B	A	A	A	B	B	B	A	B	A
BS00066165_51	TG03291B	IWB9735	1B	5.1		1B	170.93	1B	40.5					A	B	B	A	B	B	A	B	B	B	B	A	B	A	B	B	B	B	A	B	B	A	H	A	A	A	B	A	A	A	B	B	B	A	B	A
BS00093740_51	TG03731B	IWB11820	1B	5.1		1B	127.3	1B	40.5					A	B	B	A	B	B	A	B	B	B	B	A	B	A	B	B	B	B	A	B	B	A	H	A	A	A	B	A	A	A	B	B	B	A	B	A
IAAV3828	TG05441A	IWB34783	1B	5.1		1B	172.49	1B	40.5					A	B	B	A	B	B	A	B	B	B	B	A	B	A	B	B	B	B	A	B	B	A	H	A	A	A	B	A	A	A	B	B	B	A	B	A
wsnp_JD_rep_c62985_40164465	TG1103	IWA6290	1B	5.1		1B	172.49	1B	40.5					A	B	B	A	B	B	A	B	B	B	B	A	B	A	B	B	B	B	A	B	B	A	-	A	A	A	B	A	A	A	B	B	B	A	B	A
Excalibur_c32726_125	TG15956A	IWB25250	1B	5.1		1B	172.49	1B	40.5					A	B	B	A	B	B	A	B	B	B	B	A	B	A	B	B	B	B	A	B	B	A	H	A	A	A	B	A	A	A	B	B	B	A	B	A
IAAV7043	TG16951B	IWB35285	1B	5.1		1B	126.29	1B	39.7			1B	38.3	A	B	B	A	B	B	A	B	B	B	B	A	B	A	B	B	B	B	A	B	B	A	H	A	A	A	B	A	A	A	B	B	B	A	B	A
Tdurum_contig11334_554	TG20511B	IWB67022	1B	5.1		1B	159.06							A	B	B	A	B	B	A	B	B	B	B	A	B	A	B	B	B	B	A	B	B	A	H	A	A	A	B	A	A	A	B	B	B	A	B	A
wsnp_Ex_c27136_36355033	TG22561B	IWA3092	1B	5.1		1B	159.02	1B	40.5					A	B	B	A	B	B	A	B	B	B	B	A	B	A	B	B	B	B	A	B	B	A	H	A	A	A	B	A	A	A	B	B	B	A	B	A
Kukri_c17540_394	TG28191B	IWB41774	1B	5.1		1B	159.02	1B	40.5			1B	41.8	A	B	B	A	B	B	A	B	B	B	B	A	B	A	B	B	B	B	A	B	B	A	H	A	A	A	B	A	A	A	B	B	B	A	B	A
IAAV9176	TG34641B	IWB35599	1B	5.1		1B	160.39	1B	40.5					A	B	B	A	B	B	A	B	B	B	B	A	B	A	B	B	B	B	A	B	B	A	H	A	A	A	B	A	A	A	B	B	B	A	B	A
RAC875_c60360_389	TG42441B	IWB59519	1B	5.1		1B	126.29	1B	40.5			1B	38.3	A	B	B	A	B	B	A	B	B	B	B	A	B	A	B	B	B	B	A	B	B	A	-	A	A	A	B	A	A	A	B	B	B	A	B	A
Tdurum_contig9874_547	TG44231B	IWB74050	1B	5.1		1B	159.06							A	B	B	A	B	B	A	B	B	B	B	A	B	A	B	B	B	B	A	B	B	A	H	A	A	A	B	A	A	A	B	B	B	A	B	A
BS00093736_51	TG47071B	IWB11819	1B	5.1		1B	126.29	1B	40.5					A	B	B	A	B	B	A	B	B	B	B	A	B	A	B	B	-	B	A	B	B	A	H	A	A	A	B	A	A	A	B	B	B	A	B	A
wsnp_Ex_c2181_4089639	TG22411A	IWA2655	1B	5.7		1A	113.77	1A	63.4			1A	72.7053	A	B	B	A	B	B	A	B	B	B	B	A	B	A	B	B	B	B	A	B	B	A	-	A	A	A	B	A	A	A	B	B	B	A	B	A
BobWhite_c39153_131	TG36271B	IWB3038	1B	5.7		1B	123.28	1B	40.5					A	B	B	A	B	B	A	B	B	B	B	A	B	A	B	B	B	B	A	B	B	A	B	A	A	A	B	A	A	A	B	B	B	A	B	A
Ku_c5960_496	TG17491B	IWB39683	1B	5.7		1B	126.79	1B	39.7					A	B	B	A	B	B	A	B	B	B	B	A	B	A	B	B	B	B	A	B	B	A	H	A	A	A	B	A	A	A	B	B	B	A	B	A
wsnp_Ex_rep_c70593_69508988	TG45851A	IWA5702	1B	5.7		1A	124.3	1A	63.4			1A	88.1456	A	B	B	A	B	B	A	B	B	B	B	A	B	A	B	B	B	B	H	B	B	A	H	A	A	A	B	A	A	A	B	B	B	A	B	A
BS00049927_51	TG46911B	IWB8572	1B	5.7		1B	125.79	1B	40.5					A	B	B	A	B	B	A	B	B	B	B	A	B	A	B	B	B	B	A	B	B	A	H	A	A	A	B	A	A	A	B	B	B	A	B	A
BS00067003_51	TG14811B	IWB9932	1B	5.7		1B	87.43	1B	27.8					A	B	B	A	B	B	A	B	B	B	B	A	B	A	B	B	B	B	A	B	B	A	A	A	A	A	B	A	A	A	B	B	B	A	B	A
Tdurum_contig31201_380	TG09041B	IWB70190	1B	6.3		1B	197.88	1B	41.3	1B	58.8521			A	B	B	A	B	B	A	B	A	B	B	A	B	A	B	B	B	B	A	B	B	A	A	A	A	A	B	A	A	A	B	B	B	A	B	A
IACX3811	TG17121B	IWB35936	1B	6.3		1B	197.88			1B	38.2786			A	B	B	A	B	B	A	B	A	B	B	A	B	A	B	B	B	B	A	B	B	A	A	A	A	A	B	A	A	A	B	B	B	A	B	A
Kukri_c62848_106	TG1834	IWB47024	1B	6.3		1B	197.88	1B	41.3	1B	58.8521			A	B	B	A	B	B	A	B	A	B	B	A	B	A	B	B	B	B	A	B	B	A	A	A	A	A	B	A	A	A	B	B	B	A	B	A
CAP7_rep_c12580_266	TG3430	IWB14377	1B	6.3		1B	172.34	1B	41.3	1B	58.8521			A	B	B	A	B	B	A	B	A	B	B	A	B	A	B	B	B	B	A	B	B	A	A	A	A	A	B	A	A	A	B	B	B	A	B	A
Tdurum_contig14847_144	TG35281A	IWB68307	1B	6.3		1B	197.88			1B	38.2786			A	B	B	A	B	B	A	B	A	B	B	A	B	A	B	B	B	B	A	B	B	A	A	A	A	A	B	A	A	A	B	B	B	A	B	A
IAAV5269	TG39581B	IWB34998	1B	6.3		1B	160.58	1B	41.3	1B	60.2128			A	B	B	A	B	B	A	B	A	B	B	A	B	A	B	B	B	B	-	B	B	A	A	A	A	A	B	A	A	A	B	B	B	A	B	A
Excalibur_rep_c67198_530	TG05031A	IWB30826	1B	6.9		1B	54.32							A	B	B	A	B	B	A	B	A	B	B	A	B	A	B	B	B	B	A	B	B	A	H	A	A	A	B	A	A	A	B	B	B	A	B	A
RAC875_rep_c70613_78	TG08351A	IWB62711	1B	6.9		1B	160.39							A	B	B	A	B	B	A	B	A	B	B	A	B	A	B	B	B	B	A	B	B	A	H	A	A	A	B	A	A	A	B	B	B	A	B	A
wsnp_Ku_c28164_38103270	TG1115	IWA6836	1B	6.9		1B	160.39							A	B	B	A	B	B	A	B	A	B	B	A	B	A	B	B	B	B	A	B	B	A	H	A	A	A	B	A	A	A	B	B	B	A	B	A
Kukri_c92979_195	TG18471B	IWB48324	1B	6.9		1B	45.36	1B	10.2					A	B	B	A	B	B	A	B	A	B	B	A	B	A	B	B	B	B	A	B	B	A	A	A	A	A	B	A	A	A	B	B	B	A	B	A
Tdurum_contig50667_306	TG20951B	IWB72107	1B	6.9		1B	70.19							A	B	B	A	B	B	A	B	A	B	B	A	B	A	B	B	B	B	A	B	B	A	A	A	A	A	B	A	A	A	B	B	B	A	B	A
Kukri_c36151_170	TG2841	IWB44529	1B	6.9		1B	42.29	1B	10.2					A	B	B	A	B	B	A	B	A	B	B	A	B	A	B	B	B	B	A	B	B	A	-	A	A	A	B	A	A	A	B	B	B	A	B	A
BobWhite_c28295_256	TG33701A	IWB2188	1B	6.9		1B	65.22	1B	14.2					A	B	B	A	B	B	A	B	A	B	B	A	B	A	B	B	B	B	A	B	B	A	H	A	A	A	B	A	A	A	B	B	B	A	B	A
wsnp_RFL_Contig4726_5654774	TG46631D	IWA8619	1B	6.9		1B	144.74	1B	41.3			1B	33.4	A	B	B	A	B	B	A	B	A	B	B	A	B	A	B	B	B	B	H	B	B	A	A	A	A	A	B	A	A	A	B	B	B	A	B	A
Ku_c31251_565	TG00797A	IWB39145	1B	7.4		1B	197.88	1B	41.3	1B	58.8521			A	B	B	A	B	B	A	B	A	B	B	A	B	A	B	B	B	B	A	B	B	A	A	A	A	A	B	A	A	A	B	B	B	A	B	A
Excalibur_c20228_135	TG04301B	IWB23446	1B	7.4		1B	197.88	1B	41.3	1B	58.8521			A	B	B	A	B	B	A	B	A	B	B	A	B	A	B	B	B	B	-	B	B	A	A	A	A	A	B	A	A	A	B	B	B	A	B	A
Tdurum_contig31624_230	TG01431B	IWB70284	1B	7.4		1B	197.88	1B	41.3	1B	58.8521			A	B	B	A	B	B	A	B	A	B	B	A	B	A	B	B	B	B	A	B	B	A	A	A	A	A	B	A	A	A	B	B	B	A	B	A
wsnp_Ex_rep_c69266_68192766	TG45831A	IWA5592	1B	7.4		1B	197.88	1B	41.3	1B	60.2128			A	B	B	A	B	B	A	B	A	B	B	A	B	A	B	B	B	B	H	B	B	A	A	A	A	A	B	A	A	A	B	B	B	A	B	A
Tdurum_contig13391_680	TG43471B	IWB67968	1B	7.4		1B	197.88	1B	41.3	1B	58.8521			A	B	B	A	B	B	A	B	A	B	B	A	B	A	B	B	B	B	A	B	B	A	A	A	A	A	B	A	A	A	B	B	B	A	B	A
BobWhite_rep_c66146_237	TG33791B	IWB5596	1B	7.4		1B	197.88	1B	40.5	1B	58.8521			A	B	B	A	B	B	A	B	A	B	B	A	B	A	B	B	B	B	A	B	B	A	A	A	A	A	B	A	A	A	B	B	B	A	B	A
BS00012068_51	TG2460	IWB6522	1B	7.4		1B	87.43							A	B	B	A	B	B	A	B	A	B	B	A	B	A	B	B	B	B	A	B	B	A	H	A	A	A	B	A	A	A	B	B	B	A	B	A
BS00022504_51	TG24731B	IWB7122	1B	7.4		1B	14.19							A	B	B	A	B	B	A	B	A	B	B	A	B	A	B	B	B	B	A	B	B	A	A	A	A	A	B	A	A	A	B	B	B	A	B	A
BobWhite_c22266_315	TG1369	IWB1569	1B	7.4		1B	144.74							A	B	B	A	B	B	A	B	A	B	B	A	B	A	B	B	B	B	A	B	B	A	A	A	A	A	B	A	A	A	B	B	B	A	B	A
TA001643-0728	TG2029	IWB65426	1B	7.4		1B	197.88	1B	41.3					A	B	B	A	B	B	A	B	A	B	B	A	B	A	B	B	B	B	A	B	B	A	A	A	A	A	B	A	A	A	B	B	B	A	B	A
Tdurum_contig19102_84	TG20611A	IWB68771	1B	7.4		1B	172.33	1B	41.3	1B	60.2128			A	B	B	A	B	B	A	B	A	B	B	A	B	A	B	B	B	B	-	B	B	A	A	A	A	A	B	A	A	A	B	B	B	A	B	A
Tdurum_contig43346_108	TG20831B	IWB71413	1B	7.4		1B	196.51	1B	41.3	1B	58.8521			A	B	B	A	B	B	A	B	A	B	B	A	B	A	B	B	B	B	A	B	B	A	A	A	A	A	B	A	A	A	B	B	B	A	B	A
Excalibur_c15885_1145	TG26171B	IWB22709	1B	7.4		1B	172.34	1B	41.3	1B	58.8521			A	B	B	A	B	B	A	B	A	B	B	A	B	A	B	B	B	B	A	B	B	A	A	A	A	A	B	A	A	A	B	B	B	A	B	A
Kukri_c10308_342	TG28051B	IWB40316	1B	7.4		1B	197.88	1B	41.3	1B	58.8521			A	B	B	A	B	B	A	B	A	B	B	A	B	A	B	B	B	B	A	B	B	A	A	A	A	A	B	A	A	A	B	B	B	A	B	A
Tdurum_contig60809_268	TG13071B	IWB72756	1B	7.4		1B	197.88	1B	41.3	1B	58.8521			A	B	B	A	B	B	A	B	A	B	B	A	B	A	B	B	B	B	A	B	B	A	A	A	A	A	B	A	A	A	B	B	B	A	B	A
Tdurum_contig28703_293	TG35322D	IWB69597	1B	7.4		1B	36.35							A	B	B	A	B	B	A	B	A	B	B	A	B	A	B	B	B	B	A	B	B	A	A	A	A	A	B	A	A	A	B	B	B	A	B	A
TG0047	TG4425		1B	7.4										A	B	B	A	B	B	A	B	A	B	B	A	B	A	B	B	B	B	A	B	B	A	A	A	A	A	B	A	A	A	B	B	B	A	B	A
RAC875_c63624_753	TG19701B	IWB59785	1B	7.4		1B	170.93			1B	38.2786			A	B	B	A	B	B	A	B	A	B	B	A	B	A	B	B	B	B	A	B	B	A	A	A	A	A	B	A	A	A	B	B	B	A	B	A
Kukri_c76307_182	TG18431B	IWB47674	1B	7.4		1B	197.88	1B	12.6					A	B	B	A	B	B	A	B	A	B	B	A	B	A	B	B	B	B	A	B	B	A	A	A	A	A	B	A	A	A	B	B	B	A	B	A
RAC875_c18282_1390	TG41701A	IWB54643	1B	7.4		1B	172.13	1B	41.3	1B	58.8521			A	B	B	A	B	B	A	B	A	B	B	A	B	A	B	B	B	B	H	B	B	A	A	A	A	A	B	A	A	A	B	B	B	A	B	A
IAAV8952	TG0566	IWB35568	1B	7.4		1B	108.21							A	B	B	A	B	B	A	B	A	B	B	A	B	A	B	B	B	B	A	B	B	A	H	A	A	A	B	A	A	A	B	B	B	A	B	A
Ku_c1312_1194	TG1733	IWB38368	1B	7.4		1B	170.93			1B	38.2786			A	B	B	A	B	B	A	B	A	B	B	A	B	A	B	B	B	B	A	B	B	A	A	A	A	A	B	A	A	A	B	B	B	A	B	A
BS00075036_51	TG03561D	IWB10780	1B	8		1B	190.01	1B	41.3					A	B	B	A	B	B	A	B	A	B	B	A	B	A	B	B	B	B	A	B	B	A	A	A	A	A	B	A	A	A	B	B	B	A	B	A
RAC875_c44452_438	TG0777	IWB58041	1B	8		1B	190.01	1B	41.3					A	B	B	A	B	B	A	B	A	B	B	A	B	A	B	B	B	B	H	B	B	A	A	A	A	A	B	A	A	A	B	B	B	A	B	A
Kukri_c84940_106	TG06651B	IWB48018	1B	8		1B	172.13	1B	41.3					A	B	B	A	B	B	A	B	A	B	B	A	B	A	B	B	B	B	A	B	B	A	A	A	A	A	B	A	A	A	B	B	B	A	B	A
Tdurum_contig68637_256	TG0938	IWB73112	1B	8		1B	168.2							A	B	B	A	B	B	A	B	A	B	B	A	B	A	B	B	B	B	A	B	B	A	A	A	A	A	B	A	A	A	B	B	B	A	B	A
BS00065053_51	TG14751B	IWB9435	1B	8		1B	86.75			1B	60.2128			A	B	B	A	B	B	A	B	A	B	B	A	B	A	B	B	B	B	A	B	B	A	A	A	A	A	B	A	A	A	B	B	B	A	B	A
RAC875_c30138_595	TG1936	IWB56433	1B	8		1B	168.78							A	B	B	A	B	B	A	B	A	B	B	A	B	A	B	B	B	B	A	B	B	A	A	A	A	A	B	A	A	A	B	B	B	A	B	A
RFL_Contig5637_1008	TG20201A	IWB65069	1B	8		1B	197.88			1B	38.2786			A	B	B	A	B	B	A	B	A	B	B	A	B	A	B	B	B	B	A	B	B	A	A	A	A	A	B	A	A	A	B	B	B	A	B	A
Kukri_c8390_1102	TG28691A	IWB47978	1B	8		1B	31.67							A	B	B	A	B	B	A	B	A	B	B	A	B	A	B	B	B	B	A	B	B	A	A	A	A	A	B	A	A	A	B	B	B	A	B	A
Ra_c7745_1438	TG29011B	IWB52671	1B	8		1B	197.88	1B	41.3					A	B	B	A	B	B	A	B	A	B	B	A	B	A	B	B	B	B	H	B	B	A	A	A	A	A	B	A	A	A	B	B	B	A	B	A
RAC875_c30381_573	TG29401A	IWB56464	1B	8		1B	190.01	1B	40.5					A	B	B	A	B	B	A	B	A	B	B	A	B	A	B	B	B	B	H	B	B	A	A	A	A	A	B	A	A	A	B	B	B	A	B	A
RAC875_c20775_540	TG3498	IWB55062	1B	8		1B	197.88	1B	41.3					A	B	B	A	B	B	A	B	A	B	B	A	B	A	B	B	B	B	H	B	B	A	A	A	A	A	B	A	A	A	B	B	B	A	B	A
IAAV7260	TG3965	IWB35316	1B	8		1B	197.88	1B	41.3					A	B	B	A	B	B	A	B	A	B	B	A	B	A	B	B	B	B	H	B	B	A	A	A	A	A	B	A	A	A	B	B	B	A	B	A
Ra_c16069_1820	TG41381B	IWB51198	1B	8		1B	197.88	1B	41.3					A	B	B	A	B	B	A	B	A	B	B	A	B	A	B	B	B	B	A	B	B	A	A	A	A	A	B	A	A	A	B	B	B	A	B	A
wsnp_BE637971B_Ta_1_20	TG44461B	IWA406	1B	8		1B	170.93			1B	38.2786			A	B	B	A	B	B	A	B	A	B	B	A	B	A	B	B	B	B	A	B	B	A	A	A	A	A	B	A	A	A	B	B	B	A	B	A
TA015141-0717	TG2044	IWB66125	1B	8.6		1B	170.93	1B	40.5			1B	34.5	A	B	B	A	B	B	A	B	B	B	B	A	B	A	B	B	B	B	A	B	B	A	A	A	A	A	B	A	A	A	B	B	B	A	B	A
Tdurum_contig75938_1546	TG31321B	IWB73332	1B	8.6		1B	88.88			1B	60.2128			A	B	B	A	B	B	A	B	B	B	B	A	B	A	B	B	B	B	A	B	B	A	A	A	A	A	B	A	A	A	B	B	B	A	B	A
Excalibur_c3959_118	TG3854	IWB26059	1B	8.6		1B	160.39					6B	240	A	B	B	A	B	B	A	B	B	B	B	A	B	A	B	B	B	B	A	B	B	A	A	A	A	A	B	A	A	A	B	B	B	A	B	A
IAAV7915	TG39691B	IWB35406	1B	8.6		1B	170.93			1B	60.2128			A	B	B	A	B	B	A	B	B	B	B	A	B	A	B	B	B	B	A	B	B	A	A	A	A	A	B	A	A	A	B	B	B	A	B	A
wsnp_Ex_c6417_11155739	TG45551B	IWA4504	1B	8.6		1B	87.67			1B	60.2128			A	B	B	A	B	B	A	B	B	B	B	A	B	A	B	B	B	B	A	B	B	A	A	A	A	A	B	A	A	A	B	B	B	A	B	A
wsnp_Ku_c16938_25916260	TG23471B	IWA6610	1B	8.6		1B	74.76							A	B	B	A	B	B	A	B	B	B	B	A	B	A	B	B	B	B	A	B	B	A	H	A	A	A	B	A	A	A	B	B	B	A	B	A
wsnp_Ex_c11976_19193550	TG10011B	IWA1566	1B	8.6		1B	159.06							A	B	B	A	B	B	A	B	B	B	B	A	B	A	B	B	B	B	A	B	B	A	H	A	A	A	B	A	A	A	B	B	B	A	B	A
wsnp_Ex_c12063_19310114	TG10021B	IWA1578	1B	8.6		1B	87.67							A	B	B	A	B	B	A	B	B	B	B	A	B	A	B	B	B	B	A	B	B	A	B	A	A	A	B	A	A	A	B	B	B	A	B	A
wsnp_CAP7_c940_480745	TG09891B	IWA1109	1B	9.1		1B	212.02					1B	20.7	A	B	B	A	B	B	A	B	B	B	B	A	B	A	B	B	B	B	H	B	B	A	H	A	A	A	B	A	A	A	B	B	B	A	B	A
wsnp_Ex_rep_c68712_67571580	TG10901A	IWA5561	1B	9.1		1B	211.95					1B	20.7	A	B	B	A	B	B	A	B	B	B	B	A	B	A	B	B	B	B	H	B	B	A	H	A	A	A	B	A	A	A	B	B	B	A	B	A
wsnp_Ra_c2027_3945764	TG11451B	IWA7723	1B	9.1		1B	212.02					1B	20.7	A	B	B	A	B	B	A	B	B	B	B	A	B	A	B	B	B	B	H	B	B	A	H	A	A	A	B	A	A	A	B	B	B	A	B	A
GENE-3626_308	TG16651B	IWB33517	1B	9.1		1B	212.02	1B	42.9					A	B	B	A	B	B	A	B	B	B	B	A	B	A	B	B	B	B	H	B	B	A	H	A	A	A	B	A	A	A	B	B	B	A	B	A
Kukri_c13188_256	TG17651B	IWB40993	1B	9.1		1B	245.14							A	B	B	A	B	B	A	B	B	B	B	A	B	A	B	B	B	B	H	B	B	A	H	A	A	A	B	A	A	A	B	B	B	A	B	A
RAC875_rep_c74070_518	TG3012	IWB63003	1B	9.1		1B	212.02	1B	42.9					A	B	B	A	B	B	A	B	B	B	B	A	B	A	B	B	B	B	A	B	B	A	H	A	A	A	B	A	A	A	B	B	B	A	B	A
CAP11_rep_c5039_201	TG34261B	IWB13110	1B	9.1		1B	212.02	1B	42.9					A	B	B	A	B	B	A	B	B	B	B	A	B	A	B	B	B	B	A	B	B	A	H	A	A	A	B	A	A	A	B	B	B	A	B	A
BS00095568_51	TG3776	IWB11938	1B	9.1		1B	212.02	1B	42.9			1B	20.7	A	B	B	A	B	B	A	B	B	B	B	A	B	A	B	B	B	B	A	B	B	A	H	A	A	A	B	A	A	A	B	B	B	A	B	A
IAAV5704	TG39591B	IWB35076	1B	9.1		1B	212.02					1B	20.7	A	B	B	A	B	B	A	B	B	B	B	A	B	A	B	B	B	B	H	B	B	A	-	A	A	A	B	A	A	A	B	B	B	A	B	A
TA004407-0898	TG4324	IWB65832	1B	9.1		1B	223.1	1B	42.9					A	B	B	A	B	B	A	B	B	B	B	A	B	A	B	B	B	B	A	B	B	A	H	A	A	A	B	A	A	A	B	B	B	A	B	A
wsnp_Ra_c19148_28288923	TG46451B	IWA7700	1B	9.1		1B	245.14							A	B	B	A	B	B	A	B	B	B	B	A	B	A	B	B	B	B	H	B	B	A	H	A	A	A	B	A	A	A	B	B	B	A	B	A
wsnp_Ex_c852_1657319	TG48491B	IWA4811	1B	9.1		1B	207.75	1B	42.9					A	B	B	A	B	B	A	B	B	B	B	A	B	A	B	B	B	B	H	B	B	A	H	A	A	A	B	A	A	A	B	B	B	A	B	A
Excalibur_c90096_77	TG1218	IWB29292	1B	9.7		1B	227.39							A	B	B	A	B	B	A	B	B	B	B	A	B	A	B	B	B	B	A	B	B	A	H	A	A	A	B	A	A	A	B	B	B	A	B	A
BS00069723_51	TG34101B	IWB10413	1B	9.7		1B	212.02	1B	42.9					A	B	B	A	B	B	A	B	B	B	B	A	B	A	B	B	B	B	A	B	B	A	H	A	A	A	B	A	A	A	B	B	B	A	B	A
wsnp_Ra_c2027_3943938	TG46471B	IWA7721	1B	9.7		1B	212.02							A	B	B	A	B	B	A	B	B	B	B	A	B	A	B	B	B	B	A	B	B	A	H	A	A	A	B	A	A	A	B	B	B	A	B	A
TA003900-0407	TG0134	IWB65754	1B	10.3		1B	241.57	1B	46					A	B	B	A	B	B	A	B	B	B	B	A	B	A	B	B	B	B	H	B	B	A	H	A	A	A	B	A	A	A	B	B	B	A	B	A
CAP11_c2974_53	TG2571	IWB12819	1B	10.3		1B	240.63	1B	46					A	B	B	A	B	B	A	B	B	B	B	A	B	A	B	B	B	B	A	B	B	A	H	A	A	A	B	A	A	A	B	B	B	A	B	A
IACX3408	TG34651B	IWB35922	1B	10.3		1B	230.07	1B	45.3					A	B	B	A	B	B	A	B	B	B	B	A	B	A	B	B	B	B	A	B	B	A	H	A	A	A	B	A	A	A	B	B	B	A	B	A
Tdurum_contig60509_232	TG43981B	IWB72738	1B	10.3		1B	245.14							A	B	B	A	B	B	A	B	B	B	B	A	B	A	B	B	B	B	-	B	B	A	H	A	A	A	B	A	A	A	B	B	B	A	B	A
wsnp_Ra_c29782_39115548	TG46511B	IWA7836	1B	10.3		1B	243.63							A	B	B	A	B	B	A	B	B	B	B	A	B	A	B	B	B	B	A	B	B	A	H	A	A	A	B	A	A	A	B	B	B	A	B	A
wsnp_Ex_c3681_6715277	TG01691B	IWA3587	1B	10.9		1B	212.02					1B	20.7	A	B	B	A	B	B	A	B	B	B	B	A	B	A	B	B	B	B	A	B	B	A	H	A	A	A	B	A	A	A	B	B	B	A	B	A
Kukri_c51474_334	TG06481B	IWB46165	1B	10.9		1B	212.02					1B	20.7	A	B	B	A	B	B	A	B	B	B	B	A	B	A	B	B	B	B	A	B	B	A	H	A	A	A	B	A	A	A	B	B	B	A	B	A
Ra_c68984_1882	TG07091B	IWB52443	1B	10.9		1B	215.47	1B	43.7					A	B	B	A	B	B	A	B	B	B	B	A	B	A	B	B	B	B	H	B	B	A	H	A	A	A	B	A	A	A	B	B	B	A	B	A
RAC875_c865_1936	TG08171B	IWB60853	1B	10.9		1B	212.02					1B	20.7	A	B	B	A	B	B	A	B	B	B	B	A	B	A	B	B	B	B	A	B	B	A	H	A	A	A	B	A	A	A	B	B	B	A	B	A
wsnp_Ex_c2025_3799847	TG13291B	IWA2517	1B	10.9		1B	212.02					1B	20.7	A	B	B	A	B	B	A	B	B	B	B	A	B	A	B	B	B	B	A	B	B	A	H	A	A	A	B	A	A	A	B	B	B	A	B	A
RAC875_c87890_234	TG19821A	IWB60912	1B	10.9		1B	227.09	1B	43.7					A	B	B	A	B	B	A	B	B	B	B	A	B	A	B	B	B	B	A	B	B	A	H	A	A	A	B	A	A	A	B	B	B	A	B	A
BS00073132_51	TG25401B	IWB10646	1B	10.9		1B	212.19							A	B	B	A	B	B	A	B	B	B	B	A	B	A	B	B	B	B	A	B	B	A	H	A	A	A	B	A	A	A	B	B	B	A	B	A
Ra_c3083_982	TG28951B	IWB51782	1B	10.9		1B	212.02					1B	20.7	A	B	B	A	B	B	A	B	B	B	B	A	B	A	B	B	B	B	A	B	B	A	H	A	A	A	B	A	A	A	B	B	B	A	B	A
Tdurum_contig59449_249	TG43951B	IWB72646	1B	10.9		1B	227.09	1B	43.7					A	B	B	A	B	B	A	B	B	B	B	A	B	A	B	B	B	B	A	B	B	A	H	A	A	A	B	A	A	A	B	B	B	A	B	A
Tdurum_contig59449_400	TG48161B	IWB72647	1B	10.9		1B	227.09	1B	43.7					A	B	B	A	B	B	A	B	B	B	B	A	B	A	B	B	B	B	A	B	B	A	H	A	A	A	B	A	A	A	B	B	B	A	B	A
Excalibur_c30955_479	TG1592	IWB25041	1B	11.4		1B	257.54							A	B	B	A	A	B	A	B	B	B	B	A	B	A	B	B	B	B	A	B	B	A	H	A	A	A	B	A	A	A	B	B	B	A	B	A
Tdurum_contig83770_218	TG4412	IWB73651	1B	11.4		1B	257.54							A	B	B	A	A	B	A	B	B	B	B	A	B	A	B	B	B	B	A	B	B	A	H	A	A	A	B	A	A	A	B	B	B	A	B	A
Ex_c102909_778	TG15481B	IWB19579	1B	12		1B	257.54	1B	46.8					A	B	B	A	A	B	A	B	A	B	B	A	B	A	B	B	B	B	H	B	B	A	H	A	A	A	B	A	A	A	B	B	B	A	B	A
Ra_c62804_1641	TG18891D	IWB52353	1B	12		1B	257.54							A	B	B	A	A	B	A	B	A	B	B	A	B	A	B	B	B	B	A	B	B	A	-	A	A	A	B	A	A	A	B	B	B	A	B	A
wsnp_Ex_c7447_12751589	TG32651B	IWA4680	1B	12		1B	263.68							A	B	B	A	A	B	A	B	A	B	B	A	B	A	B	B	B	B	H	B	B	A	H	A	A	A	B	A	A	A	B	B	B	A	B	A
wsnp_Ex_c7447_12752449	TG35651B	IWA4681	1B	12		1A	196.21							A	B	B	A	A	B	A	B	A	B	B	A	B	A	B	B	B	B	A	B	B	A	H	A	A	A	B	A	A	A	B	B	B	A	B	A
Excalibur_c48379_461	TG1615	IWB26950	1B	12.6		1B	257.54							A	B	B	A	A	B	A	B	A	B	B	A	B	A	B	B	B	B	-	B	B	A	H	A	A	A	B	A	A	A	B	B	B	A	B	A
wsnp_BG274294B_Ta_2_3	TG21801B	IWA540	1B	13.1		1B	261.3	1B	48.4			1B	68.6	A	B	B	A	A	B	A	B	A	B	B	A	B	A	B	B	B	B	-	B	B	A	H	A	A	A	B	A	A	A	B	B	B	A	B	A
BS00048610_51	TG37101B	IWB8507	1B	13.1		1B	263.18					1B	68.6	A	B	B	A	A	B	A	B	A	B	B	A	B	A	B	B	B	B	A	B	B	A	H	A	A	A	B	A	A	A	B	B	B	A	B	A
Excalibur_c10496_651	TG0043	IWB21657	1B	14.9		1B	289.67							A	B	B	A	A	B	A	B	A	B	B	A	B	A	B	B	B	B	H	B	B	A	H	A	A	A	B	A	A	A	B	B	B	A	B	A
Kukri_c15391_468	TG06181B	IWB41378	1B	14.9		1B	288.49	1B	56.4					A	B	B	A	A	B	A	B	A	B	B	A	B	A	B	B	B	B	A	B	B	A	H	A	A	A	B	A	A	A	B	B	B	A	B	A
wsnp_Ex_c23230_32466568	TG13301B	IWA2788	1B	14.9		1B	288.66							A	B	B	A	A	B	A	B	A	B	B	A	B	A	B	B	B	B	-	B	B	A	H	A	A	A	B	A	A	A	B	B	B	A	B	A
BobWhite_c11044_322	TG13551B	IWB164	1B	14.9		1B	287.1	1B	56.4					A	B	B	A	A	B	A	B	A	B	B	A	B	A	B	B	B	B	H	B	B	A	H	A	A	A	B	A	A	A	B	B	B	A	B	A
Ex_c11930_509	TG15491B	IWB19712	1B	14.9		1B	288.66							A	B	B	A	A	B	A	B	A	B	B	A	B	A	B	B	B	B	H	B	B	A	H	A	A	A	B	A	A	A	B	B	B	A	B	A
IAAV3802	TG1687	IWB34775	1B	14.9		1B	288.66							A	B	B	A	A	B	A	B	A	B	B	A	B	A	B	B	B	B	H	B	B	A	H	A	A	A	B	A	A	A	B	B	B	A	B	A
Tdurum_contig604_356	TG21187D	IWB72730	1B	14.9		1B	317.11	1B	56.4					A	B	B	A	A	B	A	B	A	B	B	A	B	A	B	B	B	B	A	B	B	A	H	A	A	A	B	A	A	A	B	B	B	A	B	A
wsnp_Ex_c13109_20725640	TG22101B	IWA1729	1B	14.9		1B	288.66							A	B	B	A	A	B	A	B	A	B	B	A	B	A	B	B	B	B	A	B	B	A	H	A	A	A	B	A	A	A	B	B	B	A	B	A
RFL_Contig4235_707	TG30341B	IWB64623	1B	14.9		1B	288.55	1B	56.4					A	B	B	A	A	B	A	B	A	B	B	A	B	A	B	B	B	B	H	B	B	A	H	A	A	A	B	A	A	A	B	B	B	A	B	A
IACX11320	TG3972	IWB35689	1B	14.9		1B	288.49	1B	56.4					A	B	B	A	A	B	A	B	A	B	B	A	B	A	B	B	B	B	H	B	B	A	H	A	A	A	B	A	A	A	B	B	B	A	B	A
Kukri_rep_c103359_233	TG41201B	IWB48875	1B	14.9		1B	288.66							A	B	B	A	A	B	A	B	A	B	B	A	B	A	B	B	B	B	A	B	B	A	H	A	A	A	B	A	A	A	B	B	B	A	B	A
Tdurum_contig30517_310	TG43651B	IWB70038	1B	14.9		1B	303.22	1B	56.4					A	B	B	A	A	B	A	B	A	B	B	A	B	A	B	B	B	B	H	B	B	A	H	A	A	A	B	A	A	A	B	B	B	A	B	A
Tdurum_contig30517_578	TG43661B	IWB70039	1B	14.9		1B	303.22	1B	56.4					A	B	B	A	A	B	A	B	A	B	B	A	B	A	B	B	B	B	H	B	B	A	H	A	A	A	B	A	A	A	B	B	B	A	B	A
wsnp_Ex_c23235_32471767	TG45021B	IWA2790	1B	14.9		1B	288.66							A	B	B	A	A	B	A	B	A	B	B	A	B	A	B	B	B	B	A	B	B	A	H	A	A	A	B	A	A	A	B	B	B	A	B	A
wsnp_Ku_c13043_20902807	TG46041B	IWA6479	1B	14.9		1B	288.66							A	B	B	A	A	B	A	B	A	B	B	A	B	A	B	B	B	B	H	B	B	A	H	A	A	A	B	A	A	A	B	B	B	A	B	A
Tdurum_contig13117_1316	TG43461B	IWB67865	1B	15.4		1B	319.63	1B	57.2					A	B	B	A	A	B	A	B	A	B	B	A	B	A	B	B	B	B	A	B	B	A	A	A	A	A	B	A	A	A	B	B	B	A	B	A
BobWhite_c14304_687	TG24044D	IWB625	1B	16		1B	309.62							A	B	B	A	A	B	A	B	A	B	B	A	B	A	B	B	B	B	A	B	B	A	A	A	A	A	B	A	A	A	B	B	B	A	B	A
Ku_c956_1797	TG06051B	IWB40167	1B	16		1B	290.17							A	B	B	A	A	B	A	B	A	B	B	A	B	A	B	B	B	B	A	B	B	A	A	A	A	A	B	A	A	A	B	B	B	A	B	A
wsnp_Ex_c7585_12957020	TG32681B	IWA4703	1B	16		1B	288.66	1B	56.4					A	B	B	A	A	B	A	B	A	B	B	A	B	A	B	B	B	B	A	B	B	A	A	A	A	A	B	A	A	A	B	B	B	A	B	A
wsnp_Ex_c5101_9052671	TG01701B	IWA4090	1B	16.6		1B	288.66	1B	56.4					A	B	B	A	A	B	A	B	A	B	B	A	B	A	B	B	B	B	H	B	B	A	A	A	A	A	B	A	A	A	B	B	B	A	B	A
Excalibur_c9149_1326	TG16331D	IWB29347	1B	16.6		1B	288.66	1B	56.4					A	B	B	A	A	B	A	B	A	B	B	A	B	A	B	B	B	B	H	B	B	A	H	A	A	A	B	A	A	A	B	B	B	A	B	A
Tdurum_contig47550_699	TG20921B	IWB71822	1B	16.6		1B	287.06	1B	56.4					A	B	B	A	A	B	A	B	A	B	B	A	B	A	B	B	B	B	A	B	B	A	A	A	A	A	B	A	A	A	B	B	B	A	B	A
wsnp_CAP11_c287_244799	TG2185	IWA734	1B	16.6		1B	288.66							A	B	B	A	A	B	A	B	A	B	B	A	B	A	B	B	B	B	A	B	B	A	H	A	A	A	B	A	A	A	B	B	B	A	B	A
wsnp_Ku_rep_c89089_82009060	TG23821B	IWA7527	1B	16.6		1B	288.66							A	B	B	A	A	B	A	B	A	B	B	A	B	A	B	B	B	B	A	B	B	A	A	A	A	A	B	A	A	A	B	B	B	A	B	A
Kukri_c7770_176	TG28681B	IWB47726	1B	16.6		1B	287.06	1B	56.4					A	B	B	A	A	B	A	B	A	B	B	A	B	A	B	B	B	B	A	B	B	A	A	A	A	A	B	A	A	A	B	B	B	A	B	A
Kukri_c9133_2211	TG28711B	IWB48254	1B	16.6		1B	290.17	1B	56.4					A	B	B	A	A	B	A	B	A	B	B	A	B	A	B	B	B	B	A	B	B	A	A	A	A	A	B	A	A	A	B	B	B	A	B	A
wsnp_Ex_c5101_9053178	TG45401B	IWA4091	1B	16.6		1B	288.66	1B	56.4					A	B	B	A	A	B	A	B	A	B	B	A	B	A	B	B	B	B	A	B	B	A	A	A	A	A	B	A	A	A	B	B	B	A	B	A
wsnp_Ex_rep_c107911_91350866	TG45671B	IWA5159	1B	16.6		1B	288.66							A	B	B	A	A	B	A	B	A	B	B	A	B	A	B	B	B	B	A	B	B	A	H	A	A	A	B	A	A	A	B	B	B	A	B	A
wsnp_Ex_rep_c107911_91350930	TG45685B	IWA5160	1B	16.6		1B	288.66							A	B	B	A	A	B	A	B	A	B	B	A	B	A	B	B	B	B	A	B	B	A	H	A	A	A	B	A	A	A	B	B	B	A	B	A
wsnp_Ex_c15611_23929128	TG48331B	IWA2041	1B	16.6		1B	288.66	1B	56.4					A	B	B	A	A	B	A	B	A	B	B	A	B	A	B	B	B	B	H	B	B	A	A	A	A	A	B	A	A	A	B	B	B	A	B	A
BS00062724_51	TG37207A	IWB8901	1B	16.6		1B	288.66							A	B	B	A	A	B	A	B	A	B	B	A	B	A	B	B	B	B	H	B	B	A	H	A	A	A	B	A	A	A	B	B	B	A	B	A
wsnp_Ex_c21198_30327016	TG32091B	IWA2588	1B	16.6		1B	288.66							A	B	B	A	A	B	A	B	A	B	B	A	B	A	B	B	B	B	H	B	B	A	H	A	A	A	B	A	A	A	B	B	B	A	B	A
Tdurum_contig30517_174	TG48121B	IWB70037	1B	16.6		1B	300.68	1B	56.4					A	B	B	A	A	B	A	B	A	B	B	A	B	A	B	B	B	B	A	B	B	A	B	A	A	A	B	A	A	A	B	B	B	A	B	A
Excalibur_c14911_976	TG15621B	IWB22510	1B	17.7		1B	285.71					1B	82.3	A	B	B	A	A	B	A	B	B	B	B	A	B	A	B	B	B	B	A	B	B	A	H	A	A	A	B	A	A	A	B	B	B	A	B	A
Tdurum_contig42852_667	TG09101B	IWB71367	1B	18.3		1B	287.24					1B	82.3	A	B	B	A	A	B	A	B	B	B	B	A	B	A	B	B	B	B	A	B	B	A	H	A	A	A	B	A	A	A	B	B	B	A	B	A
Tdurum_contig8158_269	TG09461B	IWB73514	1B	18.3		1B	285.96					1B	83	A	B	B	A	A	B	A	B	B	B	B	A	B	A	B	B	B	B	-	B	B	A	A	A	A	A	B	A	A	A	B	B	B	A	B	A
RAC875_c55891_712	TG19651B	IWB59153	1B	18.3		1B	285.64					1B	82.3	A	B	B	A	A	B	A	B	B	B	B	A	B	A	B	B	B	B	A	B	B	A	H	A	A	A	B	A	A	A	B	B	B	A	B	A
BS00065217_51	TG25211B	IWB9482	1B	18.3		1B	285.64					1B	81.9	A	B	B	A	A	B	A	B	B	B	B	A	B	A	B	B	B	B	H	B	B	A	H	A	A	A	B	A	A	A	B	B	B	A	B	A
Excalibur_c51898_470	TG04591B	IWB27264	1B	18.9		1B	305.26							A	B	B	A	A	B	A	B	B	B	B	A	B	A	B	B	B	B	H	B	B	A	H	A	A	A	B	A	A	A	B	B	B	A	B	A
IAAV2757	TG47501B	IWB34607	1B	18.9		1B	305.26							A	B	B	A	A	B	A	B	B	B	B	A	B	A	B	B	B	B	H	B	B	A	H	A	A	A	B	A	A	A	B	B	B	A	B	A
Tdurum_contig69792_167	TG21221B	IWB73156	1B	19.4		1B	321.47	1B	58					A	B	B	A	A	B	A	B	B	B	B	A	B	A	B	B	B	B	A	B	B	A	-	A	A	A	B	A	A	A	B	B	B	A	B	A
Kukri_c9752_793	TG28731B	IWB48469	1B	19.4		1B	321.47	1B	58					A	B	B	A	A	B	A	B	B	B	B	A	B	A	B	B	B	B	A	B	B	A	H	A	A	A	B	A	A	A	B	B	B	A	B	A
wsnp_Ex_rep_c67299_65844168	TG3289	IWA5382	1B	20		1B	336.48							A	B	B	A	A	B	A	B	B	B	B	A	B	A	B	B	B	B	-	B	B	A	H	A	A	A	B	A	A	A	B	B	B	A	B	A
wsnp_Ex_rep_c67299_65845319	TG32901B	IWA5383	1B	20		1B	336.48							A	B	B	A	A	B	A	B	B	B	B	A	B	A	B	B	B	B	H	B	B	A	H	A	A	A	B	A	A	A	B	B	B	A	B	A
Excalibur_c14859_394	TG26161B	IWB22506	1B	20.6		1A	261.82			1A	96.6385			A	B	B	A	A	B	A	B	B	B	B	A	B	A	B	B	B	B	H	B	B	A	H	A	A	A	B	A	A	A	B	B	B	A	B	A
wsnp_Ex_c32284_40970312	TG10341B	IWA3384	1B	21.1		1B	327.18	1B	61.1					A	B	B	A	A	B	A	B	B	B	B	A	B	A	B	B	B	B	H	B	B	A	H	A	A	A	B	A	A	A	B	B	B	A	B	A
wsnp_Ex_c28733_37836638	TG10311B	IWA3189	1B	21.7		1B	321.47	1B	58					A	B	B	A	A	B	A	B	B	B	B	A	B	A	B	B	B	B	H	B	B	A	H	A	A	A	B	A	A	A	B	B	B	A	B	A
Tdurum_contig11896_550	TG20541A	IWB67348	1B	21.7		1B	321.47	1B	58					A	B	B	A	A	B	A	B	B	B	B	A	B	A	B	B	B	B	A	B	B	A	H	A	A	A	B	A	A	A	B	B	B	A	B	A
Ku_c1932_1583	TG4001	IWB38693	1B	21.7		1B	322.16	1B	59.6					A	B	B	A	A	B	A	B	-	B	B	A	B	A	B	B	B	B	A	B	B	A	A	A	A	A	B	A	A	A	B	B	B	A	B	A
Kukri_c8143_355	TG41071B	IWB47886	1B	21.7		1B	325.96	1B	58					A	B	B	A	A	B	A	B	B	B	B	A	B	A	B	B	B	B	H	B	B	A	H	A	A	A	B	A	A	A	B	B	B	A	B	A
BS00067627_51	TG25301B	IWB10104	1B	23.4		1B	320.89			1B	104.092			A	B	B	A	A	B	A	B	A	B	B	A	B	A	B	B	B	B	A	B	B	A	A	A	A	A	B	A	A	A	B	B	B	A	B	A
BS00042244_51	TG3396	IWB8312	1B	24.6		1B	329.81			1B	104.092			A	B	B	A	A	B	A	B	A	B	B	A	B	A	B	B	B	B	A	B	B	A	A	A	A	A	B	A	A	A	B	B	B	A	B	A
Tdurum_contig83079_133	TG44111D	IWB73608	1B	24.6		1B	330.81	1B	61.1					A	B	B	A	A	B	A	B	A	B	B	A	B	A	B	B	B	B	A	B	B	A	A	A	A	A	B	A	A	A	B	B	B	A	B	A
Excalibur_c94658_59	TG4735	IWB29471	1B	25.1		1B	340.2	1B	61.9					A	B	B	A	A	B	A	B	A	B	B	A	B	A	B	B	B	B	-	B	B	A	A	A	A	A	B	A	A	A	B	B	B	A	B	A
BS00022851_51	TG02821B	IWB7290	1B	28		1B	346.25							A	B	B	A	A	B	A	B	B	B	B	A	B	A	B	B	B	B	A	B	B	A	H	A	A	A	A	A	A	A	B	B	B	A	B	A
Ku_c16636_347	TG05901B	IWB38554	1B	28		1B	346.25							A	B	B	A	A	B	A	B	B	B	B	A	B	A	B	B	B	B	A	B	B	A	H	A	A	A	A	A	A	A	B	B	B	A	B	A
BS00063928_51	TG11821B	IWB9155	1B	28		1B	346.52							A	B	B	A	A	B	A	B	B	B	B	A	B	A	B	B	B	B	A	B	B	A	H	A	A	A	A	A	A	A	B	B	B	A	B	A
Ku_c79340_308	TG17511B	IWB40040	1B	28		1B	346.25							A	B	B	A	A	B	A	B	B	B	B	A	B	A	B	B	B	B	A	B	B	A	H	A	A	A	A	A	A	A	B	B	B	A	B	A
wsnp_Ex_c194_381656	TG22341B	IWA2411	1B	28		1B	346.25							A	B	B	A	A	B	A	B	B	B	B	A	B	A	B	B	B	B	A	B	B	A	H	A	A	A	A	A	A	A	B	B	B	A	B	A
wsnp_Ku_c41261_49287074	TG23671B	IWA7037	1B	28		1B	346.52							A	B	B	A	A	B	A	B	B	B	B	A	B	A	B	B	B	B	A	B	B	A	A	A	A	A	A	A	A	A	B	B	B	A	B	A
BS00021680_51	TG24631B	IWB6709	1B	28		1B	346.25			1B	108.734			A	B	B	A	A	B	A	B	B	B	B	A	B	A	B	B	B	B	A	B	B	A	H	A	A	A	A	A	A	A	B	B	B	A	B	A
Excalibur_c28045_741	TG26361B	IWB24662	1B	28		1B	346.25							A	B	B	A	A	B	A	B	B	B	B	A	B	A	B	B	B	B	A	B	B	A	H	A	A	-	A	A	A	-	B	B	B	A	B	-
wsnp_Ex_c18384_27213023	TG13271B	IWA2308	1B	28.6		1B	346.25							A	B	B	A	A	B	A	B	A	B	B	A	B	A	B	B	B	B	A	B	B	A	A	A	A	A	A	A	A	A	B	B	B	A	B	A
Kukri_s117372_152	TG06931A	IWB50693	1B	29.7		1B	349.72							A	B	B	A	A	B	A	B	A	B	B	A	B	A	B	B	B	B	H	B	B	A	A	A	A	A	A	A	A	A	B	B	B	A	B	A
RAC875_c78619_523	TG1286	IWB60525	1B	29.7		1B	345.5			1B	108.734			A	B	B	A	A	B	A	B	A	B	B	A	B	A	B	B	B	B	A	B	B	A	A	A	A	A	A	A	A	A	B	B	B	A	B	A
wsnp_JD_rep_c63201_40318622	TG23411B	IWA6294	1B	29.7		1B	349.72							A	B	B	A	A	B	A	B	A	B	B	A	B	A	B	B	B	B	H	B	B	A	A	A	A	A	A	A	A	A	B	B	B	A	B	A
BS00083060_51	TG15031B	IWB11283	1B	30.3		1B	358.72			1B	108.734			A	B	B	A	A	B	A	B	A	B	B	A	B	A	B	B	B	B	A	B	B	A	A	A	A	A	A	A	A	A	B	B	B	A	B	A
BobWhite_c42716_71	TG02301D	IWB3260	1B	30.9		1B	350.68			1B	108.734			A	B	B	A	A	B	A	B	A	B	B	A	B	A	B	B	B	B	A	B	B	A	H	A	A	A	A	A	A	A	B	B	B	A	B	A
RAC875_c47427_75	TG07841B	IWB58356	1B	30.9		1B	350.68			1B	108.734			A	B	B	A	A	B	A	B	A	B	B	A	B	A	B	B	B	B	H	B	B	A	H	A	A	A	A	A	A	A	B	B	B	A	B	A
RFL_Contig5937_1677	TG08621B	IWB65180	1B	30.9		1B	350.68			1B	108.734			A	B	B	A	A	B	A	B	A	B	B	A	B	A	B	B	B	B	H	B	B	A	H	A	A	A	A	A	A	A	B	B	B	A	B	A
wsnp_Ex_rep_c66255_64400455	TG10841B	IWA5186	1B	30.9		1B	350.68			1B	108.734			A	B	B	A	A	B	A	B	A	B	B	A	B	A	B	B	B	B	A	B	B	A	H	A	A	A	A	A	A	A	B	B	B	A	B	A
Excalibur_rep_c72368_68	TG16461B	IWB31201	1B	30.9		1B	350.68			1B	108.734			A	B	B	A	A	B	A	B	A	B	B	A	B	A	B	B	B	B	A	B	B	A	-	A	A	A	A	A	A	A	B	B	B	A	B	A
IACX1240	TG17071B	IWB35726	1B	30.9		1B	347.88							A	B	B	A	A	B	A	B	A	B	B	A	B	A	B	B	B	B	-	B	B	A	-	A	A	A	A	A	A	A	B	B	B	A	B	A
RAC875_c16136_1597	TG1910	IWB54224	1B	30.9		1B	201.44	1B	66.1	1B	108.734			A	B	B	A	A	B	A	B	A	B	B	A	B	A	B	B	B	B	A	B	B	A	-	A	A	A	A	A	A	A	B	B	B	A	B	A
wsnp_BE494527B_Ta_2_1	TG31631B	IWA255	1B	30.9		1B	347.88							A	B	B	A	A	B	A	B	A	B	B	A	B	A	B	B	B	B	H	B	B	A	-	A	A	A	A	A	A	A	B	B	B	A	B	A
BS00110231_51	TG47101B	IWB12497	1B	30.9		1B	350.68			1B	104.092			A	B	B	A	A	B	A	B	A	B	B	A	B	A	B	B	B	B	-	B	B	A	H	A	A	A	A	A	A	A	B	B	B	A	B	A
wsnp_Ex_c9091_15135511	TG23031B	IWA4875	1B	31.5		1B	358.72	1B	66.1					A	B	B	A	A	B	A	B	B	B	B	A	B	A	B	B	B	B	H	B	B	A	H	A	A	A	A	A	A	A	B	B	B	A	B	A
BS00067436_51	TG25291A	IWB10050	1B	31.5		1B	358.97			1B	108.734			A	B	B	A	A	B	A	B	B	B	B	A	B	A	B	B	B	B	-	B	B	A	-	A	A	A	A	A	A	A	B	B	B	A	B	A
BS00067024_51	TG46971B	IWB9937	1B	31.5		1B	346.52							A	B	B	A	A	B	A	B	B	B	B	A	B	A	B	B	B	B	A	B	B	A	H	A	A	A	A	A	A	A	B	B	B	A	B	A
BS00074911_51	TG03541B	IWB10768	1B	32		1B	365.33							A	B	B	A	A	B	A	B	B	B	B	A	B	A	B	B	B	B	A	B	B	A	H	A	A	A	A	A	A	A	B	B	B	A	B	A
wsnp_Ex_c5296_9365847	TG22801B	IWA4154	1B	33.2		1B	362.38	1B	70	1B	108.734			A	B	B	A	A	B	A	B	B	B	B	A	A	A	B	B	B	B	A	B	B	A	H	A	A	A	A	A	A	A	B	B	B	A	B	A
BS00022249_51	TG24691B	IWB6989	1B	33.2		1B	371.11	1B	71.5	1B	108.068			A	B	B	A	A	B	A	B	B	B	B	A	A	A	B	B	B	B	A	B	B	A	H	A	A	A	A	A	A	A	B	B	B	A	B	A
BS00072791_51	TG25391B	IWB10621	1B	33.2		1B	371.48	1B	71.5	1B	108.734			A	B	B	A	A	B	A	B	B	B	B	A	A	A	B	B	B	B	A	B	B	A	H	A	A	A	A	A	A	A	B	B	B	A	B	A
Tdurum_contig49651_227	TG31041D	IWB71992	1B	33.2		1B	362.38	1B	70	1B	108.734			A	B	B	A	A	B	A	B	B	B	B	A	A	A	B	B	B	B	A	B	B	A	H	A	A	A	A	A	A	A	B	B	B	A	B	A
Tdurum_contig65853_242	TG31261B	IWB73032	1B	33.2		1B	367.39	1B	70.8	1B	108.734			A	B	B	A	A	B	A	B	B	B	B	A	A	A	B	B	B	B	A	B	B	A	H	A	A	A	A	A	A	A	B	B	B	A	B	A
Tdurum_contig53772_362	TG43901B	IWB72324	1B	33.2		1B	362.38	1B	70	1B	108.734			A	B	B	A	A	B	A	B	B	B	B	A	A	A	B	B	B	B	A	B	B	A	-	A	A	A	A	A	A	A	B	B	B	A	B	A
wsnp_Ex_c5296_9365860	TG45421B	IWA4155	1B	33.2		1B	362.32	1B	70					A	B	B	A	A	B	A	B	B	B	B	A	A	A	B	B	B	B	A	B	B	A	B	A	A	A	A	A	A	A	B	B	B	A	B	A
Tdurum_contig57927_171	TG31201B	IWB72606	1B	34.3		1A	288.41			1B	108.734	1B	113.2	A	B	B	A	A	B	A	B	B	B	B	A	A	A	B	B	B	B	A	B	B	A	A	A	A	A	A	A	A	A	B	B	B	A	B	A
BS00022411_51	TG46821B	IWB7066	1B	34.3		1B	366.34			1B	108.734			A	B	B	A	A	B	A	B	B	B	B	A	A	A	B	B	B	B	A	B	B	A	A	A	A	A	A	A	A	A	B	B	B	A	B	A
IACX4411	TG17131B	IWB35958	1B	37.2		1B	368.9							A	B	B	A	A	B	A	B	A	B	B	A	A	A	B	B	B	B	A	B	B	A	H	A	A	A	A	A	A	A	B	B	B	A	B	A
wsnp_JD_c20621_18304110	TG45911B	IWA5915	1B	37.2		1B	369.91							A	B	B	A	A	B	A	B	A	B	B	A	A	A	B	B	B	B	A	B	B	A	H	A	A	A	A	A	A	A	B	B	B	A	B	A
Ra_c17685_927	TG18781B	IWB51279	1B	40.6		1B	380.52	1B	74	1B	108.068	1B	120.1	A	B	B	A	A	B	A	B	A	B	B	A	A	A	B	B	B	B	A	B	B	A	A	A	A	A	A	A	A	A	B	B	B	A	B	A
RAC875_c4190_337	TG2951	IWB57791	1B	40.6		1B	382.31	1B	74	1B	108.068			A	B	B	A	A	B	A	B	A	B	B	A	A	A	B	B	B	B	H	B	B	A	H	A	A	A	A	A	A	A	B	B	B	A	B	A
RAC875_c839_352	TG29861B	IWB60749	1B	40.6		1B	380.47							A	B	B	A	A	B	A	B	A	B	B	A	A	A	B	B	B	B	A	B	B	A	H	A	A	A	A	A	A	A	B	B	B	A	B	A
RAC875_c42275_224	TG4218	IWB57827	1B	40.6		1B	380.52	1B	74	1B	108.734			A	B	B	A	A	B	A	B	A	B	B	A	A	A	B	B	B	B	A	B	B	A	H	A	A	A	A	A	A	A	B	B	B	A	B	A
Tdurum_contig11077_122	TG20491A	IWB66919	1B	41.2		1B	377.51			1B	108.734			A	B	B	A	A	B	A	B	A	B	B	A	A	A	B	B	B	B	A	B	B	A	A	A	A	A	A	A	A	A	B	B	B	A	B	A
RAC875_c46093_492	TG42241B	IWB58214	1B	41.2		1B	382.4					1B	121.6	A	B	B	A	A	B	A	B	A	B	B	A	A	A	B	B	B	B	H	B	B	A	H	A	A	A	A	A	A	A	B	B	B	A	B	A
Kukri_c51735_79	TG0649	IWB46187	1B	42.3		1B	377.55	1B	75.6	1B	108.734			A	B	B	A	A	B	A	B	A	B	B	A	A	A	B	B	B	B	A	B	B	A	A	A	A	A	A	A	A	A	B	B	B	A	B	A
BobWhite_c2844_569	TG11621B	IWB2203	1B	42.9		1B	384.69							A	B	B	A	A	B	A	B	A	B	B	A	A	A	B	B	B	B	A	B	B	A	A	A	A	A	A	A	A	A	B	B	B	A	B	A
Kukri_c63336_621	TG06561B	IWB47064	1B	42.9		1B	376.46					1B	121.6	A	B	B	A	A	B	A	B	A	B	B	A	A	A	B	B	B	B	-	B	B	A	-	A	A	A	A	A	A	A	B	B	B	A	B	A
BS00022176_51	TG02721B	IWB6947	1B	42.9		1B	383.97	1B	75.6	1B	108.068			A	B	B	A	A	B	A	B	A	B	B	A	A	A	B	B	B	B	A	B	B	A	A	A	A	A	A	A	A	A	B	B	B	A	B	A
BS00039135_51	TG11761B	IWB8152	1B	42.9		1B	384.69							A	B	B	A	A	B	A	B	A	B	B	A	A	A	B	B	B	B	A	B	B	A	A	A	A	A	A	A	A	A	B	B	B	A	B	A
BS00094237_51	TG37721B	IWB11858	1B	43.5		1B	386.6	1B	75.6	1B	108.068			A	B	B	A	A	B	A	B	A	B	B	A	A	A	B	B	B	B	H	B	B	A	A	A	A	A	A	A	A	A	B	B	B	A	B	A
Excalibur_rep_c70674_83	TG39141B	IWB31152	1B	44		1B	387.69	1B	75.6					A	B	B	A	A	B	A	B	A	B	B	A	A	A	B	B	B	B	A	B	B	A	A	A	A	A	A	A	A	A	B	B	B	A	B	A
tplb0034e16_1165	TG0966	IWB74533	1B	44.6		1B	385.86	1B	75.6			1B	122.7	A	B	B	A	A	B	A	B	A	B	B	A	A	A	B	B	B	B	A	B	B	A	H	A	A	A	A	A	A	A	B	B	B	A	B	A
wsnp_Ex_rep_c67098_65573819	TG32881D	IWA5352	1B	44.6		1B	385.6	1B	75.6			1B	122.7	A	B	B	A	A	B	A	B	A	B	B	A	A	A	B	B	B	B	A	B	B	A	H	A	A	A	A	A	A	A	B	B	B	A	B	A
Kukri_c5357_323	TG3478	IWB46347	1B	44.6		1B	385.6	1B	75.6			1B	122.7	A	B	B	A	A	B	A	B	A	B	B	A	A	A	B	B	B	B	H	B	B	A	H	A	A	A	A	A	A	A	B	B	B	A	B	A
BS00068327_51	TG37461B	IWB10286	1B	44.6		1B	381.53					1B	121.6	A	B	B	A	A	B	A	B	A	B	B	A	A	A	B	B	B	B	A	B	B	A	-	A	A	A	A	A	A	A	B	B	B	A	B	A
Tdurum_contig10036_1044	TG0136	IWB66185	1B	46.4		1B	370.26			1B	102.776			A	B	B	A	A	B	A	B	A	B	B	A	A	A	B	B	B	B	H	B	B	A	H	A	A	A	A	A	A	A	B	B	B	A	A	A
BobWhite_c2027_215	TG02131A	IWB1371	1B	46.4		1B	391.36	1B	75.6			1B	128.6	A	B	B	A	A	B	A	B	A	B	B	A	A	A	B	B	B	B	H	B	B	A	H	A	A	A	A	A	A	A	B	B	B	A	A	A
Tdurum_contig93532_89	TG09541B	IWB73882	1B	46.4		1B	393.59			1B	104.092	1B	128.6	A	B	B	A	A	B	A	B	A	B	B	A	A	A	B	B	B	B	A	B	B	A	H	A	A	A	A	A	A	A	B	B	B	A	A	A
Tdurum_contig10036_977	TG1296	IWB66198	1B	46.4		1B	370.26			1B	108.734			A	B	B	A	A	B	A	B	A	B	B	A	A	A	B	B	B	B	A	B	B	A	-	A	A	A	A	A	A	A	B	B	B	A	A	A
Ra_c18630_284	TG18791B	IWB51317	1B	46.4		1B	391.15							A	B	B	A	A	B	A	B	A	B	B	A	A	A	B	B	B	B	A	B	B	A	H	A	A	A	A	A	A	A	B	B	B	A	A	A
Tdurum_contig10036_1614	TG20461B	IWB66191	1B	46.4		1B	370.26	1D	103.1	1B	102.776			A	B	B	A	A	B	A	B	A	B	B	A	A	A	B	B	B	B	A	B	B	A	H	A	A	A	A	A	A	A	B	B	B	A	A	A
Excalibur_c11980_619	TG26071B	IWB22011	1B	46.4		1B	393.59			1B	102.776	1B	128.6	A	B	B	A	A	B	A	B	A	B	B	A	A	A	B	B	B	B	A	B	B	A	H	A	A	A	A	A	A	A	B	B	B	A	A	A
Excalibur_c34765_1023	TG2642	IWB25498	1B	46.4		1B	391.53			1B	102.776			A	B	B	A	A	B	A	B	A	B	B	A	A	A	B	B	B	B	H	B	B	A	H	A	A	A	A	A	A	A	B	B	B	A	A	A
IAAV1683	TG2730	IWB34425	1B	46.4		1B	393.59			1B	102.776			A	B	B	A	A	B	A	B	A	B	B	A	A	A	B	B	B	B	A	B	B	A	H	A	A	A	A	A	A	A	B	B	B	A	A	A
Tdurum_contig10036_474	TG30701B	IWB66195	1B	46.4		1B	370.26			1B	102.776			A	B	B	A	A	B	A	B	A	B	B	A	A	A	B	B	B	B	A	B	B	A	-	A	A	A	A	A	A	A	B	B	B	A	A	A
BobWhite_c2027_84	TG36041B	IWB1374	1B	46.4		1B	391.53			1B	104.092	1B	128.6	A	B	B	A	A	B	A	B	A	B	B	A	A	A	B	B	B	B	H	B	B	A	H	A	A	A	A	A	A	A	B	B	B	A	A	A
Kukri_c30159_573	TG40541D	IWB43818	1B	46.4		1B	391.53			1B	102.776			A	B	B	A	A	B	A	B	A	B	B	A	A	A	B	B	B	B	H	B	B	A	H	A	A	A	A	A	A	A	B	B	B	A	A	A
Kukri_c39223_831	TG40711B	IWB44898	1B	46.4		1B	390.22	1B	75.6			1B	128.6	A	B	B	A	A	B	A	B	A	B	B	A	A	A	B	B	B	B	H	B	B	A	H	A	A	A	A	A	A	A	B	B	B	A	A	A
TA004946-0577	TG4328	IWB65905	1B	46.4		1B	370.26					1B	128.6	A	B	B	A	A	B	A	B	A	B	B	A	A	A	B	B	B	B	H	B	B	A	H	A	A	A	A	A	A	A	B	B	B	A	A	A
Tdurum_contig10036_741	TG4336	IWB66196	1B	46.4		1B	391.53			1B	102.776			A	B	B	A	A	B	A	B	A	B	B	A	A	A	B	B	B	B	-	B	B	A	H	A	A	A	A	A	A	A	B	B	B	A	A	A
IAAV5863	TG05551B	IWB35108	1B	47.5		1B	395.6	1B	77.1					A	B	B	A	A	B	A	B	A	B	B	A	A	A	B	B	B	B	A	B	B	A	A	A	A	A	A	A	A	A	B	B	B	A	A	A
RAC875_c818_1185	TG19781B	IWB60663	1B	48.1		1B	397.22							A	B	B	A	A	B	A	B	A	B	B	A	A	A	B	B	B	B	H	B	B	A	A	A	A	A	A	A	A	A	B	B	B	A	A	A
IAAV7428	TG27571B	IWB35340	1B	48.1		1B	396.61							A	B	B	A	A	B	A	B	A	B	B	A	A	A	B	B	B	B	A	B	B	A	A	A	A	A	A	A	A	A	B	B	B	A	A	A
Excalibur_c63885_115	TG04711B	IWB28242	1B	48.7		1B	391.85	1B	76.3					A	B	B	A	A	B	A	B	A	B	B	A	A	A	B	B	B	B	A	B	B	A	A	A	A	A	A	A	A	A	B	B	B	A	A	A
BobWhite_c23617_167	TG00031B	IWB1725	1B	52.7		1B	403.36	1B	84.9			1B	141.9	A	B	A	A	A	B	A	B	B	B	A	A	A	A	B	B	B	A	H	B	B	A	H	A	A	A	A	B	A	A	B	B	B	A	A	A
BS00099794_51	TG03801B	IWB12093	1B	52.7		1B	403.36	1B	84.9					A	B	A	A	A	B	A	B	B	B	A	A	A	A	B	B	B	A	A	B	B	A	-	A	A	A	A	B	A	A	B	B	B	A	A	A
Jagger_c3757_131	TG05821B	IWB36563	1B	52.7		1B	403.36	1B	84.9			1B	141.9	A	B	A	A	A	B	A	B	B	B	A	A	A	A	B	B	B	A	H	B	B	A	H	A	A	A	A	B	A	A	B	B	B	A	A	A
Tdurum_contig11216_942	TG08931B	IWB66973	1B	52.7		1B	403.36	1B	84.9			1B	141.9	A	B	A	A	A	B	A	B	B	B	A	A	A	A	B	B	B	A	H	B	B	A	H	A	A	A	A	B	A	A	B	B	B	A	A	A
RFL_Contig1823_1044	TG20051B	IWB63739	1B	52.7		1B	402.37	1B	84.9			1B	141.9	A	B	A	A	A	B	A	B	B	B	A	A	A	A	B	B	B	A	A	B	B	A	H	A	A	A	A	B	A	A	B	B	B	A	A	A
Excalibur_c8585_701	TG38931B	IWB29151	1B	52.7		1B	403.36	1B	84.9					A	B	A	A	A	B	A	B	B	B	A	A	A	A	B	B	B	A	A	B	B	A	H	A	A	A	A	B	A	A	B	B	B	A	A	A
wsnp_Ex_c13878_21738866	TG44741B	IWA1825	1B	59.7		1B	409.92	1B	85.6			1B	148.8	A	B	A	A	A	B	B	B	B	A	A	A	A	A	B	B	B	A	A	B	B	A	H	A	A	A	A	A	A	A	A	A	B	A	A	A
BobWhite_c40868_120	TG36291B	IWB3140	1B	60.2		1B	413.04			1A	45.0003	1B	151.3	A	B	A	A	A	B	B	B	B	A	A	A	A	A	B	B	B	A	A	B	B	A	H	A	A	A	A	A	A	A	A	A	B	A	A	A
RFL_Contig2971_282	TG0130	IWB64154	1B	60.2		1B	409.85	1B	85.6			1B	149.2	A	B	A	A	A	B	B	B	B	A	A	A	A	A	B	B	B	A	H	B	B	A	H	A	A	A	A	A	A	A	A	A	B	A	A	A
BS00068077_51	TG03411B	IWB10224	1B	60.2		1B	409.85	1B	85.6			1B	148.8	A	B	A	A	A	B	B	B	B	A	A	A	A	A	B	B	B	A	A	B	B	A	H	A	A	A	A	A	A	A	A	A	B	A	A	A
IACX2984	TG12401B	IWB35891	1B	60.2		1B	409.85	1B	85.6			1B	149.2	A	B	A	A	A	B	B	B	B	A	A	A	A	A	B	B	B	A	H	B	B	A	H	A	A	A	A	A	A	A	A	A	B	A	A	A
D_contig12192_450	TG38061D	IWB15640	1B	60.2		1B	409.85	1B	85.6			1B	149.2	A	B	A	A	A	B	B	B	B	A	A	A	A	A	B	B	B	A	A	B	B	A	-	A	A	A	A	A	A	A	A	A	B	A	A	A
wsnp_JD_c14411_14148961	TG4590	IWA5847	1B	61.4		1B	412.85	1B	85.6			1B	151	A	B	A	A	A	B	B	B	B	A	A	A	A	A	B	B	B	A	H	B	B	A	H	A	A	A	A	A	A	A	A	A	B	A	A	A
Tdurum_contig8840_575	TG4418	IWB73738	1B	62		1B	410.54	1B	85.6					A	B	A	A	A	B	B	B	A	A	A	A	A	A	B	B	B	A	-	B	B	A	H	A	A	A	A	A	A	A	A	A	B	A	A	A
wsnp_Ex_c38849_46284348	TG3235	IWA3660	1B	79.3		1A	368.83					1B	167.3	A	B	A	A	B	B	B	A	A	A	A	A	A	B	B	B	B	A	H	B	B	B	B	A	A	A	B	A	A	A	A	A	B	A	A	A
Tdurum_contig61914_169	TG35441A	IWB72835	1B	79.9		1B	448.35					1B	168.8	A	B	A	A	B	B	B	A	A	A	A	A	A	B	B	B	B	A	H	B	B	B	B	A	A	A	B	A	A	A	A	A	B	A	A	A
Tdurum_contig94450_255	TG21341B	IWB73912	1B	86.8		1B	465.94							A	B	A	A	B	B	B	A	A	A	A	A	A	B	B	B	B	A	A	A	B	B	H	A	A	A	B	A	A	A	A	A	B	A	A	A
IAAV3040	TG27341A	IWB34652	1B	86.8		1B	457.56							A	B	A	A	B	B	B	A	A	A	A	A	A	B	B	B	B	A	A	A	B	B	-	A	A	A	B	A	A	A	A	A	B	A	A	A
BobWhite_rep_c50057_164	TG36461A	IWB4839	1B	87.4		1B	456.01					1B	174	A	B	A	A	B	B	B	A	A	A	A	A	A	B	B	B	B	A	A	A	B	B	B	A	A	A	B	A	A	A	A	A	B	A	A	A
Tdurum_contig93330_656	TG31381B	IWB73866	1B	87.9		1B	457.56					1B	174.7	A	B	A	A	B	B	B	A	A	A	A	A	A	B	B	B	B	A	A	A	B	B	B	A	A	A	B	A	A	A	A	A	B	A	A	A
GENE-0514_210	TG4740	IWB31941	1B	88.5		1B	457.56					1B	175.9	A	B	A	A	B	B	B	A	A	A	A	A	A	B	B	B	B	A	A	A	B	B	B	A	A	A	B	A	A	A	A	A	B	A	A	A
BS00084990_51	TG03681B	IWB11394	1B	89.1		1B	468.53					1B	175.1	A	B	A	A	B	B	B	A	A	A	A	A	A	B	B	B	B	A	A	A	B	B	B	A	A	A	B	A	A	A	A	A	B	A	A	A
BS00021877_51	TG02661D	IWB6778	1B	89.7		1B	468.71					1B	175.1	A	B	A	A	B	B	B	A	A	A	A	A	A	B	B	B	B	A	A	A	B	B	B	A	A	A	B	A	A	A	A	A	B	A	A	A
Tdurum_contig10354_170	TG08891B	IWB66474	1B	90.2		1B	462.93					1B	175.1	A	B	A	A	B	B	B	A	A	A	A	A	A	B	B	B	B	A	A	A	B	B	B	A	A	A	B	A	A	A	A	A	B	A	A	B
BobWhite_c4482_73	TG1165	IWB3405	1B	94.2		1B	484.88					1B	180.7	A	B	A	A	B	A	B	A	A	A	A	A	A	B	B	B	B	A	A	A	B	B	B	A	A	A	B	A	A	A	A	A	B	A	A	B
D_contig03023_692	TG15391D	IWB15244	1B	94.2		1B	484.38							A	B	A	A	B	A	B	A	A	A	A	A	A	B	B	B	B	A	A	A	B	B	B	A	A	A	B	A	A	A	A	A	B	A	A	B
wsnp_Ex_c649_1279852	TG10671B	IWA4525	1B	94.8		1B	473.94	1B	110.1			1B	186.4	A	B	A	A	B	A	B	A	A	A	A	A	A	B	B	B	B	A	A	A	B	B	B	A	A	A	B	A	A	A	A	A	B	A	A	B
Excalibur_c35289_64	TG38491B	IWB25583	1B	94.8		1B	488.44					1B	180.7	A	B	A	A	B	A	B	A	A	A	A	A	A	B	B	B	B	A	-	A	B	B	B	A	A	A	B	A	A	A	A	A	B	A	A	B
RFL_Contig785_535	TG08634B	IWB65272	1B	95.4		1B	488.44							A	B	A	A	B	A	B	A	A	A	A	A	A	B	B	B	B	A	H	A	B	B	H	A	A	A	B	A	A	A	A	A	B	A	A	B
GENE-0543_201	TG27071A	IWB31957	1B	95.4		1B	473.94	1B	110.1					A	B	A	A	B	A	B	A	A	A	A	A	A	B	B	B	B	A	H	A	B	B	-	A	A	A	B	A	A	A	A	A	B	A	A	B
Tdurum_contig45965_563	TG20881A	IWB71657	1B	96.5		1B	481.64	1B	110.1			1B	184.5	A	B	A	A	B	A	B	A	B	A	A	A	A	B	B	B	B	A	A	A	B	B	-	A	A	A	B	A	A	A	A	A	B	A	A	B
BS00063537_51	TG37241D	IWB9077	1B	96.5		1A	391.75	1B	110.1			1B	184.5	A	B	A	A	B	A	B	A	B	A	A	A	A	B	B	B	B	A	H	A	B	B	A	A	A	A	B	A	A	A	A	A	B	A	A	B
BobWhite_c20073_382	TG46641A	IWB1341	1B	96.5		1B	482.57	1B	110.1					A	B	A	A	B	A	B	A	B	A	A	A	A	B	B	B	B	A	H	A	B	B	B	A	A	A	B	A	A	A	A	A	B	A	A	B
BS00024107_51	TG02891A	IWB7523	1B	96.5		1B	482.57					1B	180	A	B	A	A	B	A	B	A	B	A	A	A	A	B	B	B	B	A	A	A	B	B	H	A	A	A	B	A	A	A	A	A	B	A	A	B
Excalibur_c55186_351	TG3877	IWB27547	1B	97.1		1B	498.14	1B	111.7			1B	186.7	A	B	A	A	B	A	B	A	B	A	A	A	A	B	B	B	B	A	A	A	B	B	H	A	A	A	B	A	A	A	A	A	B	A	A	B
Ra_c109187_371	TG06961B	IWB50867	1B	98.3		1B	506.72							A	B	A	A	B	A	B	A	B	A	A	A	A	B	B	B	B	A	A	A	B	B	B	A	A	A	B	A	A	A	A	A	B	A	A	B
wsnp_Ex_c955_1827719	TG10801B	IWA4936	1B	98.8		1B	502.91	1B	111.7					A	B	A	A	B	A	B	A	B	A	A	A	A	B	B	B	B	A	A	A	B	B	B	A	A	A	B	A	A	A	A	A	B	A	A	B
wsnp_Ex_c1597_3045682	TG1014	IWA2077	1B	98.8		1B	507.82	1B	111.7					A	B	A	A	B	A	B	A	B	A	A	A	A	B	B	B	B	A	-	A	B	B	B	A	A	A	B	A	A	A	A	A	B	A	A	B
wsnp_BE446672B_Ta_2_1	TG21721B	IWA198	1B	98.8		1B	503.42	1B	111.7					A	B	A	A	B	A	B	A	B	A	A	A	A	B	B	B	B	A	A	A	B	B	B	A	A	A	B	A	A	A	A	A	B	A	A	B
Tdurum_contig9144_222	TG48211B	IWB73765	1B	98.8		1B	503.42	1B	111.7					A	B	A	A	B	A	B	A	B	A	A	A	A	B	B	B	B	A	A	A	B	B	B	A	A	A	B	A	A	A	A	A	B	A	A	B
Tdurum_contig51922_676	TG0923	IWB72218	1B	99.4		1B	506.72							A	B	A	A	B	A	B	A	B	A	A	A	A	B	B	B	B	A	A	A	B	B	B	A	A	A	B	A	A	A	A	A	B	A	A	B
BS00027006_51	TG14361B	IWB7641	1B	99.4		1B	508.43							A	B	A	A	B	A	B	A	B	A	A	A	A	B	B	B	B	A	A	A	B	B	B	A	A	A	B	A	A	A	A	A	B	A	A	B
wsnp_Ku_c13952_22097856	TG23451B	IWA6511	1B	99.4		1B	496.58							A	B	A	A	B	A	B	A	B	A	A	A	A	B	B	B	B	A	A	A	B	B	B	A	A	A	B	A	A	A	A	A	B	A	A	B
Excalibur_c25640_110	TG26351B	IWB24349	1B	99.4		1B	508.87							A	B	A	A	B	A	B	A	B	A	A	A	A	B	B	B	B	A	A	A	B	B	B	A	H	-	B	A	A	A	A	A	B	A	A	B
wsnp_Ku_c13952_22097895	TG46051B	IWA6512	1B	99.4		1B	496.58							A	B	A	A	B	A	B	A	B	A	A	A	A	B	B	B	B	A	-	A	B	B	B	A	A	A	B	A	A	A	A	A	B	A	A	B
GENE-0014_822	TG0059	IWB31612	1D.1	0		1D	8.98	1D	2.4			1D_part2	1	A	B	A	B	B	B	B	B	B	A	A	A	A	A	A	A	B	A	B	A	A	A	B	B	B	A	A	A	A	B	B	B	A	A	A	B
Kukri_c26168_713	TG17821D	IWB43259	1D.1	0		1D	8.98	1D	2.4			1D_part2	1	A	B	A	B	B	B	B	B	B	A	A	A	A	A	A	A	B	A	B	A	A	A	B	B	B	A	A	A	A	B	B	B	A	A	A	B
RAC875_c10925_1887	TG18971D	IWB53205	1D.1	0		1D	9.08	1D	2.4					A	B	A	B	B	B	B	B	B	A	A	A	A	A	A	A	B	A	B	A	A	A	B	B	B	A	A	A	A	B	B	B	A	A	A	B
RAC875_c20883_693	TG34991D	IWB55080	1D.1	0		1D	8.98	1D	2.4			1D_part2	1	A	B	A	B	B	B	B	B	B	A	A	A	A	A	A	A	B	A	B	A	A	A	B	B	B	A	A	A	A	B	B	B	A	A	A	B
D_GDS7LZN02IXNP1_255	TG04121D	IWB19471	1D.1	0.5		1D	9.08	1D	2.4			1D_part2	1	A	B	A	B	B	B	B	B	B	A	A	A	A	A	A	A	B	A	B	A	A	A	B	B	B	A	A	A	A	B	B	B	A	A	A	B
TA002086-1469	TG3051		1D.1	0.5										A	B	A	B	B	B	B	B	B	A	A	A	A	A	A	A	B	A	B	A	A	A	B	B	B	A	A	A	A	B	B	B	A	A	A	B
IAAV1917	TG3942	IWB34473	1D.1	0.5		1D	10.15	1D	2.4					A	B	A	B	B	B	B	B	B	A	A	A	A	A	A	A	B	A	B	A	A	A	B	B	B	A	A	A	A	B	B	B	A	A	A	B
Kukri_c36351_64	TG40641A	IWB44563	1D.1	0.5		1D	9.08	1D	2.4			1D_part2	1	A	B	A	B	B	B	B	B	B	A	A	A	A	A	A	A	B	A	B	A	A	A	B	B	B	A	A	A	A	B	B	B	A	A	A	B
wsnp_Ex_c41048_47969948	TG10451D	IWA3753	1D.1	7.8		1D	6.15	1D	0					A	B	A	B	B	B	A	B	A	A	A	A	A	A	A	A	A	A	B	A	A	A	-	B	B	A	A	A	A	B	B	B	A	A	A	B
wsnp_Ex_c1358_2600929	TG31921D	IWA1787	1D.1	24.9		1D	41.3							A	B	B	B	B	B	A	B	B	A	B	A	B	A	A	A	A	A	B	A	A	A	A	B	B	B	A	A	B	A	B	B	A	A	A	B
wsnp_Ra_c2633_5017265	TG23881D	IWA7797	1D.1	25.4		1D	48.63	1D	12.1					A	B	B	B	B	B	A	B	B	A	B	A	B	A	A	A	A	A	B	A	A	A	A	B	B	B	A	A	B	A	B	B	A	A	A	B
wsnp_Ex_c1358_2602235	TG44731D	IWA1789	1D.1	25.4		1D	47.96	1D	12.1					A	B	B	B	B	B	A	B	B	A	B	A	B	A	A	A	A	A	B	A	A	A	A	B	B	B	A	A	B	A	B	B	A	A	A	B
Kukri_c837_436	TG47831D	IWB47970	1D.1	25.4		1D	41.3							A	B	B	B	B	B	A	B	B	A	B	A	B	A	A	A	A	A	B	A	A	A	A	B	B	B	A	A	B	A	B	B	A	A	A	B
BobWhite_c33756_74	TG46661D	IWB2650	1D.1	38		1D	56.39							A	B	B	B	B	B	A	B	A	A	B	A	B	A	B	A	A	A	B	B	A	A	H	B	B	B	A	A	B	A	B	B	A	A	A	B
RAC875_c16352_594	TG07301D	IWB54277	1D.1	38.5		1A	48.95							A	B	B	B	B	B	A	B	A	A	B	A	B	A	B	A	A	A	B	B	A	A	B	B	B	B	A	A	B	A	B	B	A	A	A	B
Excalibur_c5892_1129	TG16221D	IWB27847	1D.1	40.8		1D	61.27							A	B	B	B	B	B	A	B	B	A	B	A	B	A	B	A	A	A	B	B	A	A	H	B	B	B	A	A	B	A	B	A	A	A	A	B
tplb0061f07_1411	TG21651A	IWB75288	1D.1	41.3		1D	62.78							A	B	B	B	B	B	A	B	B	A	B	A	B	A	B	A	A	A	B	B	A	A	H	B	B	B	A	A	B	A	B	A	A	A	A	B
wsnp_Ra_c1020_2062200	TG33471D	IWA7533	1D.1	41.3		1D	60.71							A	B	B	B	B	B	A	B	B	A	B	A	B	A	B	A	A	A	B	B	A	A	H	B	B	B	A	A	B	A	B	A	A	A	A	B
Excalibur_c4876_832	TG38721D	IWB26984	1D.1	41.3		1D	61.27							A	B	B	B	B	B	A	B	B	A	B	A	B	A	B	A	A	A	B	B	A	A	H	B	B	B	A	A	B	A	B	A	A	A	A	B
TA012713-0667	TG4333		1D.1	41.3										A	B	B	B	B	B	A	B	B	A	B	A	B	A	B	A	A	A	B	B	A	A	H	B	B	B	A	A	B	A	B	A	A	A	A	B
Excalibur_c15692_532	TG34371A	IWB22674	1D.1	41.9		1D	61.78	1D	16					A	B	B	B	B	B	A	B	B	A	B	A	B	A	B	A	A	A	B	B	A	A	B	B	B	B	A	A	B	A	B	A	A	A	A	B
RFL_Contig1338_2062	TG2002	IWB63609	1D.1	44.1		1D	63.3							A	B	B	B	B	B	A	B	B	A	B	A	B	A	B	A	A	A	B	B	A	A	H	B	B	B	A	A	B	A	B	A	A	A	A	B
Excalibur_c16851_142	TG26181A	IWB22866	1D.1	44.7		1D	63.3							A	B	B	B	B	B	A	B	B	A	B	A	B	A	B	A	A	A	B	B	A	A	H	B	B	B	A	A	B	A	B	A	A	A	A	B
TA017181-1031	TG0884		1D.1	48										A	B	B	B	B	B	A	B	-	A	B	A	B	A	B	A	A	A	B	B	A	A	-	B	B	B	A	A	B	A	B	A	A	A	A	B
Ku_c12842_664	TG05891D	IWB38353	1D.1	48		1D	78.35							A	B	B	B	B	B	A	B	A	A	B	A	B	A	B	A	A	A	B	B	A	A	H	B	B	B	A	A	B	A	B	A	A	A	A	B
Kukri_c46169_294	TG12541D	IWB45623	1D.1	48.6		1D	71.05							A	B	B	B	B	B	A	B	A	A	B	A	B	A	B	A	A	A	B	B	A	A	H	B	B	B	A	A	B	A	B	A	A	A	A	B
CAP8_c1305_148	TG25801B	IWB14511	1D.1	48.6		1D	71.05							A	B	B	B	B	B	A	B	A	A	B	A	B	A	B	A	A	A	B	B	A	A	H	B	B	B	A	A	B	A	B	A	A	A	A	B
CAP12_c46_333	TG03951D	IWB13406	1D.1	49.2		1D	73.91							A	B	B	B	B	B	A	B	A	A	B	A	B	A	B	A	A	A	B	B	A	A	A	B	B	B	A	A	B	A	B	A	A	A	A	B
RAC875_c2040_564	TG07401D	IWB54993	1D.1	49.2		1B	67.95							A	B	B	B	B	B	A	B	A	A	B	A	B	A	B	A	A	A	B	B	A	A	A	B	B	B	A	A	B	A	B	A	A	A	A	B
BS00023049_51	TG11741D	IWB7396	1D.1	49.2		1D	83.92							A	B	B	B	B	B	A	B	A	A	B	A	B	A	B	A	A	A	B	B	A	A	A	B	B	B	A	A	B	A	B	A	A	A	A	B
BS00022178_51	TG14251D	IWB6949	1D.1	49.2		1D	83.92							A	B	B	B	B	B	A	B	A	A	B	A	B	A	B	A	A	A	B	B	A	A	A	B	B	B	A	A	B	A	B	A	A	A	A	B
D_F5XZDLF02I14SZ_56	TG04071A	IWB17662	1D.1	50.3										A	B	B	B	B	B	A	B	B	A	B	A	B	A	B	A	A	A	B	B	A	A	A	B	B	B	A	A	B	A	B	A	A	A	A	B
RAC875_c7752_2913	TG29811D	IWB60472	1D.1	51.4		1D	72.89	1D	18.4					A	B	B	B	B	B	A	B	B	A	B	A	B	A	B	A	A	A	B	B	A	A	A	B	B	B	A	A	B	A	B	A	A	A	A	B
RAC875_c7752_145	TG35071D	IWB60471	1D.1	51.4		1D	72.89	1D	18.4					A	B	B	B	B	B	A	B	B	A	B	A	B	A	B	A	A	A	B	B	A	A	A	B	B	B	A	A	B	A	B	A	A	A	A	B
Ex_c6145_1877	TG47211D	IWB21001	1D.1	51.4		1D	72.89							A	B	B	B	B	B	A	B	B	A	B	A	B	A	B	A	A	A	B	B	A	A	A	B	B	B	A	A	B	A	B	A	A	A	A	B
D_F1BEJMU01DOR77_203	TG25871D	IWB17311	1D.1	53.1		1D	88.43							A	B	B	B	B	B	A	B	B	A	B	A	B	A	B	A	A	A	B	B	A	A	-	B	B	B	A	A	B	A	B	A	A	A	A	B
D_F5XZDLF01A85DT_301	TG04061D	IWB17484	1D.1	53.6		1D	91.47	1D	27.1					A	B	B	B	B	B	A	B	B	A	B	A	B	A	B	A	A	A	B	B	A	A	H	B	B	B	A	A	B	A	B	A	A	A	A	B
IACX9354	TG17191D	IWB36377	1D.1	53.6		1D	91.47	1D	27.1					A	B	B	B	B	B	A	B	B	A	B	A	B	A	B	A	A	A	B	B	A	A	H	B	B	B	A	A	B	A	B	A	A	A	A	B
IAAV7510	TG2758	IWB35354	1D.1	53.6		1D	91.47	1D	27.1					A	B	B	B	B	B	A	B	B	A	B	A	B	A	B	A	A	A	B	B	A	A	H	B	B	B	A	A	B	A	B	A	A	A	A	B
D_contig13475_402	TG04051D	IWB15693	1D.1	54.7		1D	88.81							A	B	B	B	A	B	A	B	B	A	B	A	B	A	B	A	A	A	B	B	A	A	B	B	B	B	A	A	B	A	B	A	A	A	A	B
Kukri_c33670_506	TG00881A	IWB44232	1D.1	57		1B	86.25							A	B	B	B	A	B	A	B	B	A	B	A	B	A	B	A	A	A	B	B	A	A	H	B	B	B	A	A	B	A	B	A	A	A	A	B
Kukri_c33670_261	TG28371D	IWB44231	1D.1	57		1D	91.77							A	B	B	B	A	B	A	B	B	A	B	A	B	A	B	A	A	A	B	B	A	A	H	B	B	B	A	A	B	A	B	A	A	A	A	B
Ra_c4899_609	TG07051D	IWB52165	1D.1	68.9		1D	126.46							A	B	B	A	A	B	A	A	B	B	B	B	B	A	B	A	A	B	B	B	A	B	H	A	B	B	A	B	B	A	B	A	A	A	A	B
wsnp_Ex_rep_c108057_91436561	TG10831D	IWA5163	1D.1	68.9		1D	132.58							A	B	B	A	A	B	A	A	B	B	B	B	B	A	B	A	A	B	B	B	A	B	H	A	B	B	A	B	B	A	B	A	A	A	A	B
wsnp_Ex_c1130_2166731	TG22011D	IWA1464	1D.1	68.9		1D	132.58							A	B	B	A	A	B	A	A	B	B	B	B	B	A	B	A	A	B	B	B	A	B	H	A	B	B	A	B	B	A	B	A	A	A	A	B
TA003135-0494	TG4804	IWB65654	1D.1	70.1		1D	136.99							A	B	B	A	A	B	A	A	B	B	B	B	B	A	B	A	A	B	B	B	A	B	H	A	B	B	A	B	B	A	B	A	A	A	A	B
wsnp_Ku_c53270_57959459	TG23731D	IWA7154	1D.1	72.3		1D	147.17	1D	59					A	B	B	A	A	B	A	A	B	B	B	B	B	A	B	B	A	B	B	B	A	B	A	A	B	B	A	B	B	A	B	A	A	A	A	B
RAC875_c33279_526	TG29451D	IWB56827	1D.1	72.3		1D	147.17	1D	59					A	B	B	A	A	B	A	A	B	B	B	B	B	A	B	B	A	B	B	B	A	B	A	A	B	B	A	B	B	A	B	A	A	A	A	B
IAAV7745	TG39681D	IWB35382	1D.1	77.9		1D	178.98							A	B	B	A	A	B	A	A	B	B	B	B	B	A	B	B	A	B	B	B	A	B	H	A	B	A	A	B	B	A	B	A	A	A	A	B
wsnp_Ku_c5560_9851459	TG11291D	IWA7170	1D.1	77.9		1D	178.98							A	B	B	A	A	B	A	A	B	B	B	B	B	A	B	B	A	B	B	B	A	B	H	A	B	A	A	B	B	A	B	A	A	A	A	B
wsnp_Ku_c5560_9853214	TG11301D	IWA7171	1D.1	77.9		1D	169.75							A	B	B	A	A	B	A	A	B	B	B	B	B	A	B	B	A	B	B	B	A	B	B	A	B	A	A	B	B	A	B	A	A	A	A	B
Excalibur_c19237_895	TG12061D	IWB23271	1D.1	78.5		1D	178.98							A	B	B	A	A	B	A	A	B	B	B	B	B	A	B	B	A	B	B	B	A	B	H	A	B	A	A	B	B	A	B	A	A	A	A	B
RAC875_c43831_91	TG07751D	IWB57981	1D.1	78.5		1D	178.98							A	B	B	A	A	B	A	A	B	B	B	B	B	A	B	B	A	B	B	B	A	B	H	A	B	A	A	B	B	A	B	A	A	A	A	B
Kukri_c29121_654	TG34711D	IWB43648	1D.1	78.5		1D	181.95							A	B	B	A	A	B	A	A	B	B	B	B	B	A	B	B	A	B	B	B	A	B	H	A	B	A	A	B	B	A	B	A	A	A	A	B
wsnp_Ku_c2624_4986980	TG23531D	IWA6791	1D.1	78.5		1D	169.75							A	B	B	A	A	B	A	A	B	B	B	B	B	A	B	B	A	B	B	B	A	B	H	A	B	A	A	B	B	A	B	A	A	A	A	B
wsnp_Ex_c1318_2519998	TG22111D	IWA1736	1D.1	78.5		1D	175.58							A	B	B	A	A	B	A	A	B	B	B	B	B	A	B	B	A	B	B	B	A	B	H	A	B	A	A	B	B	A	B	A	A	A	A	B
wsnp_Ex_c27290_36498531	TG32221D	IWA3108	1D.1	78.5		1D	176.31							A	B	B	A	A	B	A	A	B	B	B	B	B	A	B	B	A	B	B	B	A	B	H	A	B	A	A	B	B	A	B	A	A	A	A	B
TA004358-0724	TG0875	IWB65822	1D.1	78.5		1D	169.16							A	B	B	A	A	B	A	A	B	B	B	B	B	A	B	B	A	B	B	B	A	B	H	A	B	A	A	B	B	A	B	A	A	A	A	B
IAAV868	TG12381D	IWB35520	1D.1	78.5		1D	181.95							A	B	B	A	A	B	A	A	B	B	B	B	B	A	B	B	A	B	B	B	A	B	A	A	B	A	A	B	B	A	B	A	A	A	A	B
wsnp_Ex_c8188_13842273	TG01781D	IWA4777	1D.1	79.1		1D	181.22							A	B	B	A	A	B	A	A	B	B	B	B	B	A	B	B	A	B	B	B	A	B	H	A	B	A	A	B	B	A	B	A	A	A	A	B
wsnp_Ex_c27290_36498462	TG10301D	IWA3107	1D.1	79.1		1D	169.75							A	B	B	A	A	B	A	A	B	B	B	B	B	A	B	B	A	B	B	B	A	B	H	A	B	A	A	B	B	A	B	A	A	A	A	B
RAC875_c4135_1028	TG19511B	IWB57713	1D.1	79.1		1D	181.95							A	B	B	A	A	B	A	A	B	B	B	B	B	A	B	B	A	B	B	B	A	B	H	A	B	A	A	B	B	A	B	A	A	A	A	B
RFL_Contig3622_1217	TG20131D	IWB64429	1D.1	79.1		1D	169.16							A	B	B	A	A	B	A	A	B	B	B	B	B	A	B	B	A	B	B	B	A	B	H	A	B	A	A	B	B	A	B	A	A	A	A	B
wsnp_Ex_c3831_6966926	TG22681D	IWA3638	1D.1	79.1		1D	181.95							A	B	B	A	A	B	A	A	B	B	B	B	B	A	B	B	A	B	B	B	A	B	H	A	B	A	A	B	B	A	B	A	A	A	A	B
RAC875_c3604_1527	TG42051D	IWB57155	1D.1	79.1		1D	178.98							A	B	B	A	A	B	A	A	B	B	B	B	B	A	B	B	A	B	B	B	A	B	H	A	B	A	A	B	B	A	B	A	A	A	A	B
TA004476-0719	TG2038	IWB65846	1D.1	79.6		1D	181.22							A	B	B	A	A	B	A	A	B	B	B	B	B	A	B	B	A	B	B	B	A	B	-	A	B	A	A	B	B	A	B	A	A	A	A	B
BS00079095_51	TG34141D	IWB11061	1D.1	79.6		1D	178.98							A	B	B	A	A	B	A	A	B	B	B	B	B	A	B	B	A	B	B	B	A	B	H	A	B	A	A	B	B	A	B	A	A	A	A	B
wsnp_Ex_c25974_35235456	TG10291D	IWA3013	1D.1	79.6		1D	174.86							A	B	B	A	A	B	A	A	B	B	B	B	B	A	B	B	A	B	B	B	A	B	H	A	B	A	A	B	B	A	B	A	A	A	A	B
D_GBF1XID01DNWRS_378	TG04101D	IWB18403	1D.1	79.6		1D	167.37							A	B	B	A	A	B	A	A	B	B	B	B	B	A	B	B	A	B	B	B	A	B	H	A	B	A	A	B	B	A	B	A	A	A	A	B
Excalibur_c8188_693	TG16301B	IWB29011	1D.1	80.2		1D	181.95							A	B	B	A	A	B	A	A	B	B	B	B	B	A	B	B	A	B	B	B	A	B	H	A	B	A	A	B	B	A	B	A	A	A	A	B
BobWhite_c10977_834	TG35871D	IWB146	1D.1	80.2		1D	178.98							A	B	B	A	A	B	A	A	B	B	B	B	B	A	B	B	A	B	B	B	A	B	H	A	B	A	A	B	B	A	B	A	A	A	A	B
RAC875_c54260_127	TG42351D	IWB59019	1D.1	80.2		1D	178.98	1D	69.4					A	B	B	A	A	B	A	A	B	B	B	B	B	A	B	B	A	B	B	B	A	B	H	A	B	A	A	B	B	A	B	A	A	A	A	B
Ra_c21676_178	TG07011D	IWB51439	1D.1	80.2		1D	181.22							A	B	B	A	A	B	A	A	B	B	B	B	B	A	B	B	A	B	B	B	A	B	H	A	B	A	A	B	B	A	B	A	A	A	A	B
IAAV2840	TG16851D	IWB34619	1D.1	80.2		1D	178.98							A	B	B	A	A	B	A	A	B	B	B	B	B	A	B	B	A	B	B	B	A	B	H	A	B	A	A	B	B	A	B	A	A	A	A	B
wsnp_JD_c8173_9207415	TG13461D	IWA6186	1D.1	80.2		1D	169.75							A	B	B	A	A	B	A	A	B	B	B	B	B	A	B	B	A	B	B	B	A	B	H	A	B	A	A	B	B	A	B	A	A	A	A	B
D_contig06122_208	TG15401D	IWB15375	1D.1	80.2		1D	178.98							A	B	B	A	A	B	A	A	B	B	B	B	B	A	B	B	A	B	B	B	A	B	H	A	B	A	A	B	B	A	B	A	A	A	A	B
Excalibur_c23155_327	TG3838	IWB23920	1D.1	80.2		1B	271.32							A	B	B	A	A	B	A	A	B	B	B	B	B	A	B	B	A	B	B	B	A	B	H	A	B	A	A	B	B	A	B	A	A	A	A	B
BS00058554_51	TG37161D	IWB8739	1D.1	80.2		1D	181.95							A	B	B	A	A	B	A	A	B	B	B	B	B	A	B	B	A	B	B	B	A	B	H	A	B	A	A	B	B	A	B	A	A	A	A	B
Excalibur_c8188_243	TG38901D	IWB29010	1D.1	80.2		1D	181.95							A	B	B	A	A	B	A	A	B	B	B	B	B	A	B	B	A	B	B	B	A	B	H	A	B	A	A	B	B	A	B	A	A	A	A	B
wsnp_Ku_c7266_12551048	TG35791D	IWA7276	1D.1	80.2		1D	179.22	1D	69.4					A	B	B	A	A	B	A	A	B	B	B	B	B	A	B	B	A	B	B	B	A	B	A	A	B	A	A	B	B	A	B	A	A	A	A	B
RAC875_c35846_671	TG29471D	IWB57122	1D.1	80.7		1D	157.66							A	B	B	A	A	B	A	A	B	B	B	B	B	A	B	B	A	B	B	B	A	B	A	A	B	A	A	B	B	A	B	A	A	A	A	B
BS00075001_51	TG03551D	IWB10778	1D.1	80.7		1D	182.67							A	B	B	A	A	B	A	A	B	B	B	B	B	A	B	B	A	B	B	B	A	B	H	A	B	A	A	B	B	A	B	A	A	A	A	B
GENE-0511_161	TG2706	IWB31938	1D.1	80.7		1D	157.57							A	B	B	A	A	B	A	A	B	B	B	B	B	A	B	B	A	B	B	B	A	B	H	A	B	A	A	B	B	A	B	A	A	A	A	B
IAAV5841	TG27461B	IWB35103	1D.1	80.7		1D	157.66	1D	71					A	B	B	A	A	B	A	A	B	B	B	B	B	A	B	B	A	B	B	B	A	B	H	A	B	A	A	B	B	A	B	A	A	A	A	B
IAAV7473	TG39671D	IWB35348	1D.1	81.3		1D	157.66	1D	71					A	B	B	A	A	B	A	A	B	B	B	B	B	A	B	B	A	B	B	B	A	B	H	A	B	A	A	B	B	A	B	A	A	A	A	B
BS00021702_51	TG14141D	IWB6723	1D.1	81.3		1D	184.06							A	B	B	A	A	B	A	A	B	B	B	B	B	A	B	B	A	B	B	B	A	B	H	A	B	A	A	B	B	A	B	A	A	A	A	B
Excalibur_c48317_242	TG38701B	IWB26941	1D.1	81.3		1D	157.66	1D	71					A	B	B	A	A	B	A	A	B	B	B	B	B	A	B	B	A	B	B	B	A	B	H	A	B	A	A	B	B	A	B	A	A	A	A	B
Excalibur_c50856_63	TG3873	IWB27183	1D.1	81.3		1D	157.66	1D	71					A	B	B	A	A	B	A	A	B	B	B	B	B	A	B	B	A	B	B	B	A	B	H	A	B	A	A	B	B	A	B	A	A	A	A	B
BS00022768_51	TG02801D	IWB7250	1D.1	81.9		1D	182.67	1D	70.2					A	B	B	A	A	B	A	A	B	B	B	B	B	A	B	B	A	B	B	B	A	B	H	A	B	A	A	B	B	A	B	A	A	A	A	B
GENE-0511_484	TG47391D	IWB31940	1D.1	81.9		1D	157.57							A	B	B	A	A	B	A	A	B	B	B	B	B	A	B	B	A	B	B	B	A	B	H	A	B	A	A	B	B	A	B	A	A	A	A	B
BobWhite_c6998_365	TG24352D	IWB4265	1D.1	81.9		1D	157.66							A	B	B	A	A	B	A	A	B	B	B	B	B	A	B	B	A	B	B	B	A	B	A	A	B	A	A	B	B	A	B	A	A	A	A	B
RAC875_c49612_102	TG07871D	IWB58572	1D.1	81.9		1D	157.57							A	B	B	A	A	B	A	A	B	B	B	B	B	A	B	B	A	B	B	B	A	B	H	A	B	A	A	B	B	A	B	A	A	A	A	B
wsnp_Ex_c12447_19847242	TG31861D	IWA1631	1D.1	81.9		1D	184.06	1D	71					A	B	B	A	A	B	A	A	B	B	B	B	B	A	B	B	A	B	B	B	A	B	-	A	B	A	A	B	B	A	B	A	A	A	A	B
BS00082503_51	TG03641D	IWB11260	1D.1	81.9		1D	182.67							A	B	B	A	A	B	A	A	B	B	B	B	B	A	B	B	A	B	B	B	A	B	H	A	B	A	A	B	B	A	B	A	A	A	A	B
GENE-0315_356	TG05111B	IWB31799	1D.1	81.9		1D	157.66							A	B	B	A	A	B	A	A	B	B	B	B	B	A	B	B	A	B	B	B	A	B	H	A	B	A	A	B	B	A	B	A	A	A	A	B
CAP11_c3464_68	TG1528	IWB12851	1D.1	81.9		1D	184.06							A	B	B	A	A	B	A	A	B	B	B	B	B	A	B	B	A	B	B	B	A	B	H	A	B	A	A	B	B	A	B	A	A	A	A	B
D_GA8KES401EYUM8_190	TG15451D	IWB17816	1D.1	81.9		1D	182.67							A	B	B	A	A	B	A	A	B	B	B	B	B	A	B	B	A	B	B	B	A	B	H	A	B	A	A	B	B	A	B	A	A	A	A	B
wsnp_Ex_rep_c66423_64641115	TG23121D	IWA5234	1D.1	81.9		1D	184.06	1D	71					A	B	B	A	A	B	A	A	B	B	B	B	B	A	B	B	A	B	B	B	A	B	H	A	B	A	A	B	B	A	B	A	A	A	A	B
wsnp_Ex_rep_c69024_67924125	TG23231D	IWA5577	1D.1	81.9		1D	184.06							A	B	B	A	A	B	A	A	B	B	B	B	B	A	B	B	A	B	B	B	A	B	H	A	B	A	A	B	B	A	B	A	A	A	A	B
BS00066188_51	TG25264D	IWB9742	1D.1	81.9		1D	157.66							A	B	B	A	A	B	A	A	B	B	B	B	B	A	B	B	A	B	B	B	A	B	-	A	B	A	A	B	B	A	B	A	A	A	A	B
Kukri_c6051_640	TG40951D	IWB46866	1D.1	81.9		1D	182.67							A	B	B	A	A	B	A	A	B	B	B	B	B	A	B	B	A	B	B	B	A	B	H	A	B	A	A	B	B	A	B	A	A	A	A	B
RAC875_c87321_108	TG42591D	IWB60890	1D.1	81.9		1D	157.66	1D	71					A	B	B	A	A	B	A	A	B	B	B	B	B	A	B	B	A	B	B	B	A	B	B	A	B	A	A	B	B	A	B	A	A	A	A	B
wsnp_Ex_c15396_23659859	TG44761D	IWA2021	1D.1	81.9		1D	157.57							A	B	B	A	A	B	A	A	B	B	B	B	B	A	B	B	A	B	B	B	A	B	H	A	B	A	A	B	B	A	B	A	A	A	A	B
wsnp_Ex_c18665_27541568	TG44871D	IWA2340	1D.1	81.9		1D	184.06	1D	71					A	B	B	A	A	B	A	A	B	B	B	B	B	A	B	B	A	B	B	B	A	B	H	A	B	A	A	B	B	A	B	A	A	A	A	B
wsnp_Ex_c16429_24929065	TG4482	IWA2132	1D.1	83.6		1D	200.09	1D	76.1			1D	0.4	A	B	B	A	A	B	A	A	A	B	B	B	B	A	B	B	A	B	B	B	A	B	A	A	B	A	A	B	B	A	B	A	A	A	A	B
CAP7_c9557_164	TG15361D	IWB14334	1D.1	84.2		1D	198.02							A	B	B	A	A	B	A	A	A	B	B	B	B	A	B	B	A	B	B	B	A	B	A	A	B	A	A	B	B	A	B	A	A	A	A	B
RAC875_c46460_1128	TG29561D	IWB58253	1D.1	84.2		1D	162.26							A	B	B	A	A	B	A	A	A	B	B	B	B	A	B	B	A	B	B	B	A	B	A	A	B	A	A	B	B	A	B	A	A	A	A	B
wsnp_Ex_c29613_38622101	TG32271D	IWA3242	1D.1	84.2		1D	198.94							A	B	B	A	A	B	A	A	A	B	B	B	B	A	B	B	A	B	B	B	A	B	A	A	B	A	A	B	B	A	B	A	A	A	A	B
Kukri_rep_c103469_126	TG06771A	IWB48890	1D.1	84.7										A	B	B	A	A	B	A	A	A	B	B	B	B	A	B	B	A	B	B	B	A	B	A	A	B	A	A	B	B	A	B	A	A	A	A	B
Excalibur_c19857_549	TG34381D	IWB23391	1D.1	84.7										A	B	B	A	A	B	A	A	A	B	B	B	B	A	B	B	A	B	B	B	A	B	A	A	B	A	A	B	B	A	B	A	A	A	A	B
Excalibur_c45119_251	TG38641B	IWB26635	1D.1	84.7		1D	162.26							A	B	B	A	A	B	A	A	A	B	B	B	B	A	B	B	A	B	B	B	A	B	A	A	B	A	A	B	B	A	B	A	A	A	A	B
wsnp_Ex_c9577_15855968	TG45641D	IWA4938	1D.1	84.7		1D	198.02	1D	74.6					A	B	B	A	A	B	A	A	A	B	B	B	B	A	B	B	A	B	B	B	A	B	A	A	B	A	A	B	B	A	B	A	A	A	A	B
wsnp_Ra_c17989_26960545	TG4644	IWA7675	1D.1	84.7		1D	196.92	1D	76.1					A	B	B	A	A	B	A	A	A	B	B	B	B	A	B	B	A	B	B	B	A	B	A	A	B	A	A	B	B	A	B	A	A	A	A	B
Excalibur_c53900_86	TG16201D	IWB27436	1D.1	85.3		1D	196.92	1D	74.6					A	B	B	A	A	B	A	A	A	B	B	B	B	A	B	B	A	B	B	B	A	B	A	A	B	A	A	B	B	A	B	A	A	A	A	B
IAAV6648	TG39611D	IWB35227	1D.1	85.3		1D	163.27							A	B	B	A	A	B	A	A	A	B	B	B	B	A	B	B	A	B	B	B	A	B	A	A	B	A	A	B	B	A	B	A	A	A	A	B
wsnp_Ra_rep_c70864_68811253	TG11541D	IWA8173	1D.1	86.4		1D	205	1D	81					A	B	B	A	A	B	A	A	A	B	B	B	B	A	B	B	A	B	B	B	A	B	A	A	B	A	A	B	B	A	B	A	A	A	A	B
Ra_c11906_1417	TG1875	IWB50980	1D.1	86.4										A	B	B	A	A	B	A	A	A	B	B	B	B	A	B	B	A	B	B	B	A	B	A	A	B	A	A	B	B	A	B	A	A	A	A	B
Ex_c68201_1182	TG26041D	IWB21141	1D.1	86.4										A	B	B	A	A	B	A	A	A	B	B	B	B	A	B	B	A	B	B	B	A	B	A	A	B	A	A	B	B	A	B	A	A	A	A	B
IAAV4569	TG27421B	IWB34891	1D.1	86.4										A	B	B	A	A	B	A	A	A	B	B	B	B	A	B	B	A	B	B	B	A	B	A	A	B	A	A	B	B	A	B	A	A	A	A	B
Ra_c11906_1441	TG2891	IWB50981	1D.1	86.4		1D	200.09	1D	77.7					A	B	B	A	A	B	A	A	A	B	B	B	B	A	B	B	A	B	B	B	A	B	A	A	B	A	A	B	B	A	B	A	A	A	A	B
wsnp_Ex_rep_c68201_66980814	TG45811D	IWA5514	1D.1	86.4		1D	205.27							A	B	B	A	A	B	A	A	A	B	B	B	B	A	B	B	A	B	B	B	A	B	A	A	B	A	A	B	B	A	B	A	A	A	A	B
wsnp_Ku_c26635_36605013	TG46221D	IWA6805	1D.1	86.4		1D	205	1D	81					A	B	B	A	A	B	A	A	A	B	B	B	B	A	B	B	A	B	B	B	A	B	A	A	B	A	A	B	B	A	B	A	A	A	A	B
tplb0036b21_694	TG4825	IWB74596	1D.1	86.4										A	B	B	A	A	B	A	A	A	B	B	B	B	A	B	B	A	B	B	B	A	B	A	A	B	A	A	B	B	A	B	A	A	A	A	B
Ra_c27073_507	TG28941D	IWB51649	1D.1	87								1D	0.4	A	B	B	A	A	B	A	A	A	B	B	B	B	A	B	B	A	B	B	B	A	B	A	A	B	A	A	B	B	A	B	A	A	A	A	B
wsnp_Ra_c11594_18777085	TG46401A	IWA7570	1D.1	87.5		1A	249.81	1A	89.2					A	B	B	A	A	B	A	A	A	B	B	B	B	A	B	B	A	B	B	B	A	B	A	A	B	A	A	B	B	A	B	A	A	A	A	B
IAAV149	TG05381D	IWB34391	1D.1	88.1										A	B	B	A	A	B	A	A	A	B	B	B	B	A	B	B	A	B	B	B	A	B	A	A	B	A	A	B	B	A	B	A	A	A	A	B
RAC875_c50811_655	TG1281	IWB58694	1D.1	88.1										A	B	B	A	A	B	A	A	A	B	B	B	B	A	B	B	A	B	B	B	A	B	A	A	B	A	A	B	B	A	B	A	A	A	A	B
Jagger_c5542_100	TG27841D	IWB36644	1D.1	88.1										A	B	B	A	A	B	A	A	A	B	B	B	B	A	B	B	A	B	B	B	A	B	A	A	B	A	A	B	B	A	B	A	A	A	A	B
IAAV724	TG05591D	IWB35314	1D.1	89.2		1D	205.27							A	B	B	A	A	B	A	A	B	B	B	B	B	A	B	B	A	B	B	B	A	B	A	A	B	A	A	B	B	A	B	A	A	A	A	B
Ra_c21472_1369	TG1880	IWB51437	1D.1	89.2		1D	205.27							A	B	B	A	A	B	A	A	B	B	B	B	B	A	B	B	A	B	B	B	A	B	A	A	B	A	A	B	B	A	B	A	A	A	A	B
IAAV3490	TG2738	IWB34724	1D.1	89.2		1D	205.27							A	B	B	A	A	B	A	A	B	B	B	B	B	A	B	B	A	B	B	B	A	B	A	A	B	A	A	B	B	A	B	A	A	A	A	B
Excalibur_c8231_398	TG34471D	IWB29028	1D.1	89.2		1D	205.27							A	B	B	A	A	B	A	A	B	B	B	B	B	A	B	B	A	B	B	B	A	B	A	A	B	A	A	B	B	A	B	A	A	A	A	B
IACX574	TG39781D	IWB36010	1D.1	89.2										A	B	B	A	A	B	A	A	B	B	B	B	B	A	B	B	A	B	B	B	A	B	A	A	B	A	A	B	B	A	B	A	A	A	A	B
RAC875_c10083_154	TG41551B	IWB52901	1D.1	89.2		1D	205.27							A	B	B	A	A	B	A	A	B	B	B	B	B	A	B	B	A	B	B	B	A	B	A	A	B	A	A	B	B	A	B	A	A	A	A	B
wsnp_Ku_c40309_48558476	TG46261D	IWA7023	1D.1	89.2		1D	205.79	1D	81					A	B	B	A	A	B	A	A	B	B	B	B	B	A	B	B	A	B	B	B	A	B	A	A	B	A	A	B	B	A	B	A	A	A	A	B
RFL_Contig4705_3207	TG4308	IWB64774	1D.1	89.8		1D	206.3	1D	81					A	B	B	A	A	B	A	A	B	B	B	B	B	A	B	B	A	B	B	B	A	B	A	A	B	A	A	B	B	A	B	A	A	A	A	B
IAAV9177	TG1702	IWB35600	1D.1	89.8		1D	205.27							A	B	B	A	A	B	A	A	B	B	B	B	B	A	B	B	A	B	B	B	A	B	A	A	B	A	A	B	B	A	B	A	A	A	A	B
Excalibur_c8301_1555	TG26821D	IWB29054	1D.1	89.8		1A	258.92	1D	81					A	B	B	A	A	B	A	A	B	B	B	B	B	A	B	B	A	B	B	B	A	B	A	A	B	A	A	B	B	A	B	A	A	A	A	B
RAC875_c55026_311	TG42371D	IWB59090	1D.1	89.8		1D	205.27	1D	81					A	B	B	A	A	B	A	A	B	B	B	B	B	A	B	B	A	B	B	B	A	B	A	A	B	A	A	B	B	A	B	A	A	A	A	B
wsnp_Ex_rep_c111610_93458148	TG4571	IWA5182	1D.1	89.8		1D	205.27	1D	81					A	B	B	A	A	B	A	A	B	B	B	B	B	A	B	B	A	B	B	B	A	B	A	A	B	A	A	B	B	A	B	A	A	A	A	B
D_GDS7LZN02GSCOW_131	TG47181D	IWB19412	1D.1	90.4		1D	205.27							A	B	B	A	A	B	A	A	B	B	B	B	B	A	B	B	A	B	B	B	A	B	A	A	B	A	A	B	B	A	B	A	A	A	A	B
IACX223	TG39751D	IWB35846	1D.1	91.5										A	B	B	A	A	B	A	A	A	B	B	B	B	A	B	B	A	B	B	B	A	B	A	A	B	A	A	B	B	A	B	A	A	A	A	B
Excalibur_c92298_213	TG16341D	IWB29387	1D.2	0		1B	496.85							A	B	B	A	A	B	B	B	A	B	B	A	A	B	B	B	B	A	B	A	B	B	H	A	A	A	B	B	B	A	B	B	A	B	B	A
tplb0049h18_1121	TG21591B	IWB74942	1D.2	1.1		1D	325.81							A	B	B	A	A	B	B	B	B	B	B	A	A	B	B	B	B	A	B	A	B	B	B	A	A	A	B	B	B	A	B	B	A	B	B	A
Ex_c70834_198	TG34341B	IWB21243	1D.2	1.1		1D	325.81							A	B	B	A	A	B	B	B	B	B	B	A	A	B	B	B	B	A	B	A	B	B	B	A	A	A	B	B	B	A	B	B	A	B	B	A
Excalibur_c10063_93	TG34351D	IWB21516	1D.2	1.1		1D	313.43							A	B	B	A	A	B	B	B	B	B	B	A	A	B	B	B	B	A	B	A	B	B	B	A	A	A	B	B	B	A	B	B	A	B	B	A
RFL_Contig2961_759	TG43031D	IWB64150	1D.2	1.1		1D	313.14							A	B	B	A	A	B	B	B	B	B	B	A	A	B	B	B	B	A	B	A	B	B	B	A	A	A	B	B	B	A	B	B	A	B	B	A
RAC875_c43846_154	TG19541D	IWB57984	1D.2	1.7		1D	320.61							A	B	B	A	A	B	B	B	B	B	B	A	A	B	B	B	B	A	B	A	B	B	B	A	A	A	B	B	B	A	B	B	A	B	B	A
RAC875_c8503_644	TG29871A	IWB60791	1D.2	1.7		1D	322.12							A	B	B	A	A	B	B	B	B	B	B	A	A	B	B	B	B	A	B	A	B	B	B	A	A	A	B	B	B	A	B	B	A	B	B	A
RFL_Contig3395_1575	TG3028	IWB64331	1D.2	1.7		1D	326.27							A	B	B	A	A	B	B	B	B	B	B	A	A	B	B	B	B	A	B	A	B	B	B	A	A	A	B	B	B	A	B	B	A	B	B	A
Tdurum_contig10099_538	TG30711B	IWB66252	1D.2	1.7		1D	322.12							A	B	B	A	A	B	B	B	B	B	B	A	A	B	B	B	B	A	B	A	B	B	B	A	A	A	B	B	B	A	B	B	A	B	B	A
Ra_c97840_496	TG0717	IWB52856	1D.2	1.7		1D	320.61							A	B	B	A	A	B	B	B	B	B	B	A	A	B	B	B	B	A	B	A	B	B	B	A	A	A	B	B	B	A	B	B	A	B	B	A
IAAV279	TG39481B	IWB34614	1D.2	1.7		1D	312.77	1D	128.7					A	B	B	A	A	B	B	B	B	B	B	A	A	B	B	B	B	A	B	A	B	B	B	A	A	A	B	B	B	A	B	B	A	B	B	A
RFL_Contig2961_1493	TG43021A	IWB64145	1D.2	1.7		1D	312.49							A	B	B	A	A	B	B	B	B	B	B	A	A	B	B	B	B	A	B	A	B	B	B	A	A	A	B	B	B	A	B	B	A	B	B	A
BS00011292_51	TG02621D	IWB6381	1D.2	1.7		1D	312.49							A	B	B	A	A	B	B	B	B	B	B	A	A	B	B	B	B	A	B	A	B	B	B	A	A	A	B	B	B	A	B	B	A	B	B	A
RAC875_c9601_1680	TG01221A	IWB61145	1D.2	1.7		1D	313.26							A	B	B	A	A	B	B	B	B	B	B	A	A	B	B	B	B	A	B	A	B	B	B	A	A	A	B	B	B	A	B	B	A	B	B	A
RAC875_c19174_645	TG4173	IWB54785	1D.2	1.7		1D	312.49							A	B	B	A	A	B	B	B	B	B	B	A	A	B	B	B	B	A	B	A	B	B	B	A	A	A	B	B	B	A	B	B	A	B	B	A
RAC875_c39312_339	TG29501B	IWB57504	1D.2	1.7		1D	325.56							A	B	B	A	A	B	B	B	B	B	B	A	A	B	B	B	B	A	B	A	B	B	B	A	A	A	B	B	B	A	B	B	A	B	B	A
BobWhite_c2135_96	TG3606	IWB1489	1D.2	1.7		1D	313.43							A	B	B	A	A	B	B	B	B	B	B	A	A	B	B	B	B	A	B	A	B	B	B	A	A	A	B	B	B	A	B	B	A	B	B	A
Excalibur_c981_294	TG16381D	IWB29609	1D.2	1.7		1D	334.55							A	B	B	A	A	B	B	B	B	B	B	A	A	B	B	B	B	A	B	A	B	B	B	A	A	A	B	B	B	A	B	B	A	B	B	A
BobWhite_c8375_71	TG11671D	IWB4465	1D.2	1.7		1D	313.26							A	B	B	A	A	B	B	B	B	B	B	A	A	B	B	B	B	A	B	A	B	B	B	A	A	A	B	B	B	A	B	B	A	B	B	A
BS00003573_51	TG02541D	IWB5833	1D.2	1.7		1D	322.12							A	B	B	A	A	B	B	B	B	B	B	A	A	B	B	B	B	A	B	A	B	B	B	A	A	A	B	B	B	A	B	B	A	B	B	A
RFL_Contig2550_583	TG43011B	IWB63987	1D.2	1.7		1D	313.43							A	B	B	A	A	B	B	B	B	B	B	A	A	B	B	B	B	A	B	A	B	B	B	A	A	A	B	B	B	A	B	B	A	B	B	A
Tdurum_contig44851_888	TG20861B	IWB71548	1D.2	1.7		1D	312.49							A	B	B	A	A	B	B	B	B	B	B	A	A	B	B	B	B	A	B	A	B	B	B	A	A	A	B	B	B	A	B	B	A	B	B	A
Excalibur_c11939_140	TG1559	IWB22002	1D.2	2.8		1D	313.26							A	B	B	A	A	B	B	B	B	B	B	A	A	B	B	B	B	A	B	A	B	B	B	A	A	A	B	B	B	A	B	B	A	B	B	A
BS00009375_51	TG36551D	IWB6050	1D.2	2.8		1D	312.49							A	B	B	A	A	B	B	B	B	B	B	A	A	B	B	B	B	A	B	A	B	B	B	A	A	A	B	B	B	A	B	B	A	B	B	A
RFL_Contig2961_1117	TG48001A	IWB64144	1D.2	2.8		1D	312.49							A	B	B	A	A	B	B	B	B	B	B	A	A	B	B	B	B	A	B	A	B	B	B	A	A	A	B	B	B	A	B	B	A	B	B	A
Kukri_rep_c106578_178	TG41231D	IWB49192	1D.2	2.8		1D	325.81							A	B	B	A	A	B	B	B	B	B	B	A	A	B	B	B	B	A	B	A	B	B	B	A	A	A	B	B	B	A	B	B	A	B	B	A
Kukri_c82190_267	TG41081D	IWB47916	1D.2	2.8		1D	312.49							A	B	B	A	A	B	B	B	B	B	B	A	A	B	B	B	B	A	B	A	B	B	B	A	A	A	B	B	B	A	B	B	A	B	B	A
BS00009738_51	TG02601D	IWB6105	1D.2	2.8		1D	325.9	1D	139.7					A	B	B	A	A	B	B	B	B	B	B	A	A	B	B	B	B	A	B	A	B	B	B	A	A	A	B	B	B	A	B	B	A	B	B	A
BobWhite_c33208_98	TG46651A	IWB2612	1D.2	2.8		1D	325.56	1D	139.7					A	B	B	A	A	B	B	B	B	B	B	A	A	B	B	B	B	A	B	A	B	B	B	A	A	A	B	B	B	A	B	B	A	B	B	A
Kukri_rep_c69829_307	TG0103	IWB49948	1D.2	2.8		1D	317.04							A	B	B	A	A	B	B	B	B	B	B	A	A	B	B	B	B	A	B	A	B	B	B	A	A	A	B	B	B	A	B	B	A	B	B	A
RAC875_rep_c99027_551	TG42911A	IWB63373	1D.2	2.8		1D	320.61							A	B	B	A	A	B	B	B	B	B	B	A	A	B	B	B	B	A	B	A	B	B	B	A	A	A	B	B	B	A	B	B	A	B	B	A
Excalibur_c27873_266	TG38441A	IWB24638	1D.2	2.8		1D	315.52	1D	129.5					A	B	B	A	A	B	B	B	B	B	B	A	A	B	B	B	B	-	B	A	B	B	B	A	A	A	B	B	B	A	B	B	A	B	B	A
BS00011947_51	TG00121A	IWB6500	1D.2	2.8		1D	313.43							A	B	B	A	A	B	B	B	B	B	B	A	A	B	B	B	B	A	B	A	B	B	B	A	A	A	B	B	B	A	B	B	A	B	B	A
BS00011168_51	TG14081D	IWB6360	1D.2	2.8		1D	334.55							A	B	B	A	A	B	B	B	B	B	B	A	A	B	B	B	B	A	B	A	B	B	B	A	A	A	B	B	B	A	B	B	A	B	B	A
BobWhite_c14422_282	TG24051B	IWB644	1D.2	2.8		1D	320.61	1D	128.7					A	B	B	A	A	B	B	B	B	B	B	A	A	B	B	B	B	A	B	A	B	B	B	A	A	A	B	B	B	A	B	B	A	B	B	A
RAC875_c24317_1351	TG41851B	IWB55628	1D.2	2.8		1D	320.61							A	B	B	A	A	B	B	B	B	B	B	A	A	B	B	B	B	A	B	A	B	B	B	A	A	A	B	B	B	A	B	B	A	B	B	A
Excalibur_c43086_237	TG0455	IWB26413	1D.2	2.8		1D	313.43							A	B	B	A	A	B	B	B	B	B	B	A	A	B	B	B	B	A	B	A	B	B	B	A	A	A	B	B	B	A	B	B	A	B	B	A
RAC875_c24317_1015	TG41841A	IWB55626	1D.2	2.8		1D	314.74	1D	131.1					A	B	B	A	A	B	B	B	B	B	B	A	A	B	B	B	B	A	B	A	B	B	B	A	A	A	B	B	B	A	B	B	A	B	B	A
BobWhite_c1824_1380	TG11591A	IWB1147	1D.2	2.8		1D	312.27							A	B	B	A	A	B	B	B	B	B	B	A	A	B	B	B	B	A	B	A	B	B	B	A	A	A	B	B	B	A	B	B	A	B	B	A
Excalibur_c13076_384	TG15601B	IWB22208	1D.2	2.8		1D	320.61							A	B	B	A	A	B	B	B	B	B	B	A	A	B	B	B	B	A	B	A	B	B	B	A	A	A	B	B	B	A	B	B	A	B	B	A
Excalibur_rep_c102637_58	TG04941D	IWB29851	1D.2	3.4		1D	312.49							A	B	B	A	A	B	B	B	B	B	B	A	A	B	B	B	B	A	B	A	B	B	B	A	A	A	B	B	B	A	B	B	A	B	B	A
BS00059313_51	TG25091A	IWB8770	1D.2	3.4		1D	312.77							A	B	B	A	A	B	B	B	B	B	B	A	A	B	B	B	B	A	B	A	B	B	B	A	A	A	B	B	B	A	B	B	A	B	B	A
RAC875_rep_c112310_481	TG19961A	IWB62142	1D.2	3.9		1D	312.49							A	B	B	A	A	B	B	B	B	B	B	A	A	B	B	B	B	A	B	A	B	B	B	A	A	A	B	B	B	A	B	B	A	B	B	A
BobWhite_c38981_117	TG36261B	IWB3021	1D.2	3.9		1D	312.49							A	B	B	A	A	B	B	B	B	B	B	A	A	B	B	B	B	A	-	A	B	B	B	A	A	A	B	B	B	A	B	B	A	B	B	A
BobWhite_c20073_443	TG02121A	IWB1342	1D.2	3.9		1B	457.56	1B	110.1					A	B	B	A	A	B	B	B	B	B	B	A	A	B	B	B	B	A	B	A	B	B	B	A	A	A	B	B	B	A	B	B	A	B	B	A
RAC875_c17367_549	TG29161A	IWB54456	1D.2	3.9		1D	308.26							A	B	B	A	A	B	B	B	B	B	B	A	A	B	B	B	B	A	B	A	B	B	B	A	A	A	B	B	B	A	B	B	A	B	B	A
Tdurum_contig29915_167	TG01421A	IWB69918	1D.2	3.9		1D	336.56	1D	139.7					A	B	B	A	A	B	B	B	B	B	B	A	A	B	B	B	B	A	B	A	B	B	B	A	A	A	B	B	B	A	B	B	A	B	B	A
BS00010807_51	TG02611B	IWB6291	1D.2	3.9		1D	312.49							A	B	B	A	A	B	B	B	B	B	B	A	A	B	B	B	B	A	B	A	B	B	B	A	A	A	B	B	B	A	B	B	A	B	B	A
BS00062631_51	TG46921A	IWB8874	1D.2	3.9		1D	312.27							A	B	B	A	A	B	B	B	B	B	B	A	A	B	B	B	B	A	B	A	B	B	B	A	A	A	B	B	B	A	B	B	A	B	B	A
Ra_c50996_468	TG07061D	IWB52198	1D.2	4.5		1D	312.27							A	B	B	A	A	B	B	B	B	B	B	A	A	B	B	B	B	A	B	A	B	B	B	A	A	A	B	B	B	A	B	B	A	B	B	A
wsnp_Ku_c26281_36243489	TG23551B	IWA6795	1D.2	5		1A	397.67							A	B	B	A	A	B	B	B	B	B	B	A	A	B	B	B	B	A	B	A	B	B	B	A	A	A	B	B	B	A	B	B	A	B	B	A
BS00022654_51	TG36801D	IWB7196	1D.2	5		1D	322.12	1D	135.8					A	B	B	A	A	B	B	B	B	B	B	A	A	B	B	B	B	A	B	A	B	B	B	A	A	A	B	B	B	A	B	B	A	B	B	A
Excalibur_c5838_110	TG04661A	IWB27806	1D.2	5		1D	320.61							A	B	B	A	A	B	B	B	B	B	B	A	A	B	B	B	B	A	B	A	B	B	B	A	A	A	B	B	B	A	B	B	A	B	B	A
TA003848-0343	TG3058		1D.2	5										A	B	B	A	A	B	B	B	B	B	B	A	A	B	B	B	B	A	B	A	B	B	B	A	A	A	B	B	B	A	B	B	A	B	B	A
Excalibur_c39284_1132	TG26471B	IWB26021	1D.2	5		1D	325.81							A	B	B	A	A	B	B	B	B	B	B	A	A	B	B	B	B	A	B	A	B	B	B	A	A	A	B	B	B	A	B	B	A	B	B	A
Kukri_rep_c103800_479	TG41211D	IWB48914	1D.2	5		1D	313.43							A	B	B	A	A	B	B	B	B	B	B	A	A	B	B	B	B	A	B	A	B	B	B	A	A	A	B	B	B	A	B	B	A	B	B	A
Excalibur_c41967_2009	TG3857	IWB26291	1D.2	5		1D	313.43							A	B	B	A	A	B	B	B	B	B	B	A	A	B	B	B	B	A	B	A	B	B	B	A	A	A	B	B	B	A	B	B	A	B	B	A
BS00011508_51	TG02631A	IWB6421	1D.2	5		1D	322.12							A	B	B	A	A	B	B	B	B	B	B	A	A	B	B	B	B	A	B	A	B	B	B	A	A	A	B	B	B	A	B	B	A	B	B	A
Excalibur_c8235_241	TG04831A	IWB29029	1D.2	5		1D	313.43							A	B	B	A	A	B	B	B	B	B	B	A	A	B	B	B	B	A	B	A	B	B	B	A	A	A	B	B	B	A	B	B	A	B	B	A
RAC875_rep_c71408_412	TG08361B	IWB62784	1D.2	5		1D	322.12							A	B	B	A	A	B	B	B	B	B	B	A	A	B	B	B	B	A	B	A	B	B	B	A	A	A	B	B	B	A	B	B	A	B	B	A
Excalibur_c10063_189	TG1555	IWB21514	1D.2	5		1D	313.26							A	B	B	A	A	B	B	B	B	B	B	A	A	B	B	B	B	A	B	A	B	B	B	A	A	A	B	B	B	A	B	B	A	B	B	A
Excalibur_c6704_716	TG16251D	IWB28462	1D.2	5		1D	313.43							A	B	B	A	A	B	B	B	B	B	B	A	A	B	B	B	B	A	B	A	B	B	B	A	A	A	B	B	B	A	B	B	A	B	B	A
Kukri_c14292_157	TG17671D	IWB41182	1D.2	5		1D	313.26							A	B	B	A	A	B	B	B	B	B	B	A	A	B	B	B	B	A	B	A	B	B	B	A	A	A	B	B	B	A	B	B	A	B	B	A
Kukri_c38809_309	TG18061D	IWB44844	1D.2	5		1D	322.12							A	B	B	A	A	B	B	B	B	B	B	A	A	B	B	B	B	A	B	A	B	B	B	A	A	A	B	B	B	A	B	B	A	B	B	A
BS00010946_51	TG24551D	IWB6319	1D.2	5		1D	312.49							A	B	B	A	A	B	B	B	B	B	B	A	A	B	B	B	B	A	B	A	B	B	B	A	A	A	B	B	B	A	B	B	A	B	B	A
Excalibur_c8161_1443	TG26811D	IWB29002	1D.2	5		1D	320.61							A	B	B	A	A	B	B	B	B	B	B	A	A	B	B	B	B	A	B	A	B	B	B	A	A	A	B	B	B	A	B	B	A	B	B	A
RFL_Contig2961_2046	TG30271D	IWB64148	1D.2	5		1D	313.43							A	B	B	A	A	B	B	B	B	B	B	A	A	B	B	B	B	A	B	A	B	B	B	A	A	A	B	B	B	A	B	B	A	B	B	A
RAC875_c37075_53	TG4206	IWB57242	1D.2	5		1D	312.49							A	B	B	A	A	B	B	B	B	B	B	A	A	B	B	B	B	A	B	A	B	B	B	A	A	A	B	B	B	A	B	B	A	B	B	A
TA003848-1166	TG4323		1D.2	5										A	B	B	A	A	B	B	B	B	B	B	A	A	B	B	B	B	A	B	A	B	B	B	A	A	A	B	B	B	A	B	B	A	B	B	A
Excalibur_c6704_782	TG47321A	IWB28463	1D.2	5		1D	313.43							A	B	B	A	A	B	B	B	B	B	B	A	A	B	B	B	B	A	B	A	B	B	B	A	A	A	B	B	B	A	B	B	A	B	B	A
Excalibur_c500_279	TG12121D	IWB27104	1D.2	5.6		1D	312.49							A	B	B	A	A	B	B	B	B	B	B	A	A	B	B	B	B	A	B	A	B	B	B	A	A	A	B	B	B	A	B	B	A	B	B	A
RAC875_c6537_584	TG47941B	IWB59941	1D.2	5.6		1D	312.27							A	B	B	A	A	B	B	B	B	B	B	A	A	B	B	B	B	A	B	A	B	B	B	A	A	A	B	B	B	A	B	B	A	B	B	A
BobWhite_rep_c63205_143	TG3647	IWB5347	1D.2	5.6		1D	312.49	1D	143.6					A	B	B	A	A	B	B	B	B	B	B	A	A	B	B	B	B	A	B	A	B	B	B	A	A	A	B	B	B	A	B	B	A	B	B	A
BobWhite_c45204_251	TG36341D	IWB3443	1D.2	5.6		1D	312.27							A	B	B	A	A	B	B	B	B	B	B	A	A	B	B	B	B	A	B	A	B	B	B	A	A	A	B	B	B	A	B	B	A	B	B	A
BobWhite_rep_c63264_629	TG0247	IWB5356	1D.2	5.6		1D	312.27							A	B	B	A	A	B	B	B	B	B	B	A	A	B	B	B	B	A	B	A	B	B	B	A	A	A	B	B	B	A	B	B	A	B	B	A
wsnp_Ku_c40759_48907151	TG1123	IWA7034	1D.2	5.6		1A	397.67							A	B	B	A	A	B	B	B	B	B	B	A	A	B	B	B	B	A	B	A	B	B	B	A	A	A	B	B	B	A	B	B	A	B	B	A
RAC875_s117301_141	TG42921A	IWB63464	1D.2	5.6		1D	312.27							A	B	B	A	A	B	B	B	B	B	B	A	A	B	B	B	B	A	B	A	B	B	B	A	A	A	B	B	B	A	B	B	A	B	B	A
RAC875_c4036_1020	TG42141B	IWB57614	1D.2	5.6		1D	312.49							A	B	B	A	A	B	B	B	B	B	B	A	A	B	B	B	B	A	B	A	B	B	B	A	A	A	B	B	B	A	B	B	A	B	B	A
Tdurum_contig49509_606	TG09201B	IWB71971	1D.2	5.6		1B	484.88	1B	111.7					A	B	B	A	A	B	B	B	B	B	B	A	A	B	B	B	B	A	B	A	B	B	B	A	A	A	B	B	B	A	B	B	A	B	B	A
BS00004769_51	TG46721D	IWB5990	1D.2	5.6		1D	312.27							A	B	B	A	A	B	B	B	B	B	B	A	A	B	B	B	B	A	B	A	B	B	B	A	A	A	B	B	B	A	B	B	A	B	B	A
RAC875_c14613_68	TG07291A	IWB53956	1D.2	6.2		1D	313.43							A	B	B	A	A	B	B	B	B	B	B	A	A	B	B	B	B	A	B	A	B	B	B	A	A	A	B	B	B	A	B	B	A	B	B	A
BS00093990_51	TG00322A	IWB11847	2A	0		2A	72.16							A	B	A	A	B	B	B	B	A	B	A	A	B	A	A	B	B	B	A	B	A	A	A	B	B	B	B	B	B	A	B	B	B	A	A	B
TA003766-0683	TG0874	IWB65738	2A	0										A	B	A	A	B	B	B	B	A	B	A	A	B	A	A	B	B	B	A	B	A	A	A	B	B	B	B	B	B	A	B	B	B	A	A	B
wsnp_Ku_c33374_42877546	TG46242A	IWA6922	2A	0.6		2A	30.24	2A	4	2A	8.82485	2A	10.4123	A	B	A	A	B	B	B	B	A	B	A	A	B	A	A	B	B	B	A	B	A	A	A	B	B	B	B	B	B	A	B	B	B	A	A	B
wsnp_Ku_c23598_33524490	TG01862A	IWA6745	2A	1.1		2A	24.49	2A	0.8					A	B	A	A	B	B	B	B	A	B	A	A	B	A	A	B	B	B	A	B	A	A	-	B	B	B	B	B	B	A	B	B	B	A	A	B
BobWhite_c13373_250	TG02042A	IWB490	2A	1.1		2A	27.86					2A	10.0438	A	B	A	A	B	B	B	B	A	B	A	A	B	A	A	B	B	B	A	B	A	A	A	B	B	B	B	B	B	A	B	B	B	A	A	B
wsnp_Ex_c19516_28481857	TG22352A	IWA2425	2A	1.1		2A	10.89	2A	0.8					A	B	A	A	B	B	B	B	A	B	A	A	B	A	A	B	B	B	A	B	A	A	H	B	B	B	B	B	B	A	B	B	B	A	A	B
RFL_Contig174_406	TG30202A	IWB63717	2A	1.1		2A	10.89	2A	0.8					A	B	A	A	B	B	B	B	A	B	A	A	B	A	A	B	B	B	A	B	A	A	H	B	B	B	B	B	B	A	B	B	B	A	A	B
IACX11417	TG1239	IWB35702	2A	1.7		2A	68.9	2A	10.5					A	B	A	A	B	B	B	B	A	B	A	A	B	A	A	B	B	B	A	B	A	A	A	B	B	B	B	B	B	A	B	B	B	A	A	B
RAC875_c47161_100	TG12792A	IWB58321	2A	1.7		2A	68.9	2A	10.5					A	B	A	A	B	B	B	B	A	B	A	A	B	A	A	B	B	B	A	B	A	A	A	B	B	B	B	B	B	A	B	B	B	A	A	B
CAP12_c259_307	TG1531	IWB13316	2A	1.7		2A	68.9	2A	10.5					A	B	A	A	B	B	B	B	A	B	A	A	B	A	A	B	B	B	A	B	A	A	A	B	B	B	B	B	B	A	B	B	B	A	A	B
wsnp_RFL_Contig1951_1127302	TG23972A	IWA8274	2A	1.7		2A	68.9	2A	10.5					A	B	A	A	B	B	B	B	A	B	A	A	B	A	A	B	B	B	A	B	A	A	A	B	B	B	B	B	B	A	B	B	B	A	A	B
BS00022532_51	TG24752A	IWB7141	2A	1.7		2D	42.08							A	B	A	A	B	B	B	B	A	B	A	A	B	A	A	B	B	B	A	B	A	A	A	B	B	B	B	B	B	A	B	B	B	A	A	B
Excalibur_c12177_285	TG26082D	IWB22049	2A	1.7		2A	68.9	2A	10.5					A	B	A	A	B	B	B	B	A	B	A	A	B	A	A	B	B	B	A	B	A	A	A	B	B	B	B	B	B	A	B	B	B	A	A	B
RAC875_c26214_505	TG29342B	IWB55908	2A	1.7		2A	68.9	2A	10.5					A	B	A	A	B	B	B	B	A	B	A	A	B	A	A	B	B	B	A	B	A	A	A	B	B	B	B	B	B	A	B	B	B	A	A	B
Tdurum_contig11802_864	TG30732B	IWB67302	2A	1.7						2A	5.52311			A	B	A	A	B	B	B	B	A	B	A	A	B	A	A	B	B	B	A	B	A	A	A	B	B	B	B	B	B	A	B	B	B	A	A	B
Kukri_c3882_2021	TG34732A	IWB44846	2A	1.7		2A	68.9	2A	10.5					A	B	A	A	B	B	B	B	A	B	A	A	B	A	A	B	B	B	A	B	A	A	A	B	B	B	B	B	B	A	B	B	B	A	A	B
BobWhite_c12426_84	TG35932B	IWB365	2A	1.7		2A	45.51					2B	10.7553	A	B	A	A	B	B	B	B	A	B	A	A	B	A	A	B	B	B	A	B	A	A	A	B	B	B	B	B	B	A	B	B	B	A	A	B
BS00067382_51	TG37432D	IWB10033	2A	1.7										A	B	A	A	B	B	B	B	A	B	A	A	B	A	A	B	B	B	A	B	A	A	A	B	B	B	B	B	B	A	B	B	B	A	A	B
IACX6178	TG3981	IWB36119	2A	1.7		2A	68.9	2A	10.5					A	B	A	A	B	B	B	B	A	B	A	A	B	A	A	B	B	B	A	B	A	A	A	B	B	B	B	B	B	A	B	B	B	A	A	B
RAC875_c829_1143	TG42582A	IWB60723	2A	1.7		2A	45.51	2A	10.5					A	B	A	A	B	B	B	B	A	B	A	A	B	A	A	B	B	B	A	B	A	A	A	B	B	B	B	B	B	A	B	B	B	A	A	B
Kukri_c23195_266	TG47762A	IWB42762	2A	1.7		2A	45.51	2A	10.5					A	B	A	A	B	B	B	B	A	B	A	A	B	A	A	B	B	B	A	B	A	A	A	B	B	B	B	B	B	A	B	B	B	A	A	B
Excalibur_c21663_145	TG26262A	IWB23669	2A	2.2		2A	70.18			2A	43.496			A	B	A	A	B	B	B	B	A	B	A	A	B	A	A	B	B	B	A	B	A	A	A	B	B	B	B	B	B	A	B	B	B	A	A	B
TA002254-0660	TG3519	IWB65522	2A	2.2		2A	27.86							A	B	A	A	B	B	B	B	A	B	A	A	B	A	A	B	B	B	A	B	A	A	A	B	B	B	B	B	B	A	B	B	B	A	A	B
Ra_c26532_894	TG2893	IWB51633	2A	2.8										A	B	A	A	B	B	B	B	A	B	A	A	B	A	A	B	B	B	A	B	A	A	A	B	B	B	B	B	B	A	B	B	B	A	A	B
IAAV8501	TG1700	IWB35488	2A	2.8										A	B	A	A	B	B	B	B	A	B	A	A	B	A	A	B	B	B	A	B	A	A	A	B	B	B	B	B	B	A	B	B	B	A	A	B
Excalibur_c18324_390	TG26202A	IWB23116	2A	2.8		2A	45.51							A	B	A	A	B	B	B	B	A	B	A	A	B	A	A	B	B	B	A	B	A	A	A	B	B	B	B	B	B	A	B	B	B	A	A	B
Tdurum_contig29983_490	TG43632A	IWB69935	2A	2.8										A	B	A	A	B	B	B	B	A	B	A	A	B	A	A	B	B	B	A	B	A	A	A	B	B	B	B	B	B	A	B	B	B	A	A	B
Kukri_c12648_434	TG17632D	IWB40869	2A	2.8										A	B	A	A	B	B	B	B	A	B	A	A	B	A	A	B	B	B	A	B	A	A	A	B	B	B	B	B	B	A	B	B	B	A	A	B
D_contig01272_220	TG04042D	IWB15188	2A	2.8										A	B	A	A	B	B	B	B	A	B	A	A	B	A	A	B	B	B	A	B	A	A	A	B	B	B	B	B	B	A	B	B	B	A	A	B
Excalibur_c25599_358	TG26342D	IWB24342	2A	2.8		2A	45.51							A	B	A	A	B	B	B	B	A	B	A	A	B	A	A	B	B	B	A	B	A	A	A	B	B	B	B	B	B	A	B	B	B	A	A	B
BS00093111_51	TG37682A	IWB11792	2A	2.8		2D	24.18	2D	13.9					A	B	A	A	B	B	B	B	A	B	A	A	B	A	A	B	B	B	A	B	A	A	A	B	B	B	B	B	B	A	B	B	B	A	A	B
Excalibur_c62893_629	TG38812B	IWB28154	2A	2.8										A	B	A	A	B	B	B	B	A	B	A	A	B	A	A	B	B	B	A	B	A	A	A	B	B	B	B	B	B	A	B	B	B	A	A	B
tplb0041b11_529	TG44312A	IWB74702	2A	2.8										A	B	A	A	B	B	B	B	A	B	A	A	B	A	A	B	B	B	A	B	A	A	A	B	B	B	B	B	B	A	B	B	B	A	A	B
RAC875_c5577_1682	TG42392A	IWB59140	2A	2.8		2B	26.11					2B	5.69939	A	B	A	A	B	B	B	B	A	B	A	A	B	A	A	B	B	B	A	B	A	A	B	B	B	B	B	B	B	A	B	B	B	A	A	B
Kukri_c40204_141	TG18082A	IWB45009	2A	5		2A	41.29							A	B	A	A	B	B	B	B	B	B	A	A	B	A	A	B	B	B	A	B	A	A	H	B	B	B	B	B	B	A	B	B	B	A	A	B
RAC875_c42847_141	TG1953	IWB57879	2A	5		2A	41.38							A	B	A	A	B	B	B	B	B	B	A	A	B	A	A	B	B	B	A	B	A	A	H	B	B	B	B	B	B	A	B	B	B	A	A	B
BS00021706_51	TG24642A	IWB6727	2A	5		2A	68.9	2A	10.5					A	B	A	A	B	B	B	B	B	B	A	A	B	A	A	B	B	B	A	B	A	A	H	B	B	B	B	B	B	A	B	B	B	A	A	B
Excalibur_c12980_2392	TG2612	IWB22183	2A	5		2A	41.38							A	B	A	A	B	B	B	B	B	B	A	A	B	A	A	B	B	B	A	B	A	A	H	B	B	B	B	B	B	A	B	B	B	A	A	B
TA002095-0637	TG4316	IWB65498	2A	6.2		2A	42.93					2A	7.46371	A	B	A	A	B	B	B	B	B	B	A	A	B	A	A	B	B	B	A	B	A	A	A	B	B	B	B	B	B	A	B	B	B	A	A	B
RAC875_rep_c113106_93	TG30022B	IWB62186	2A	6.7										A	B	A	A	B	B	B	B	A	B	A	A	B	A	A	B	B	B	A	B	A	A	A	B	B	B	B	B	B	A	B	B	B	A	A	B
Kukri_c31776_1621	TG4057	IWB44018	2A	7.3		2A	45.51							A	B	A	A	B	B	B	B	A	B	A	A	B	A	A	B	B	B	A	B	A	A	A	B	B	B	B	B	B	A	B	B	B	A	A	B
Kukri_c84087_154	TG06642A	IWB47995	2A	16.9		2A	109.89							A	B	A	A	B	B	B	B	A	B	A	A	B	B	A	B	B	A	A	B	A	A	A	B	B	B	B	B	B	A	B	B	B	B	A	B
wsnp_Ex_c61879_61748626	TG32602A	IWA4441	2A	16.9		2A	107.7	2A	18.9					A	B	A	A	B	B	B	B	A	B	A	A	B	B	A	B	B	A	A	B	A	A	A	B	B	B	B	B	B	A	B	B	B	B	A	B
BS00022487_51	TG02752B	IWB7112	2A	18		2A	111.4							A	B	A	A	B	B	B	B	A	B	A	A	B	B	A	B	B	A	A	B	A	A	A	B	B	B	B	B	B	A	B	B	B	B	A	B
BS00004724_51	TG02552A	IWB5988	2A	19.7		2A	121.57	2A	20.4					A	B	A	A	B	B	B	B	B	B	A	A	B	B	A	B	B	A	A	B	A	A	H	B	B	B	B	B	B	A	B	B	B	B	A	B
Ku_c23118_149	TG27942A	IWB38844	2A	23		2A	127.25							A	B	A	A	B	B	B	B	B	B	A	A	B	B	A	B	B	A	A	B	A	A	H	B	B	B	A	B	B	A	B	B	B	B	A	B
BS00076693_51	TG37502A	IWB10896	2A	23.6		2A	116.87							A	B	A	A	B	B	B	B	B	B	A	A	B	B	A	B	B	A	A	B	A	A	H	B	B	B	A	B	B	A	B	B	B	B	A	B
BobWhite_c26374_339	TG2419	IWB1996	2A	28.6		2A	131.79	2A	28.9	2A	70.3667			A	B	A	A	B	B	B	B	B	B	A	A	B	B	A	B	A	A	A	B	A	A	H	B	B	B	A	B	B	A	B	A	B	B	A	B
RAC875_c14944_555	TG12712A	IWB54033	2A	29.2		2A	134.28			2A	70.3667			A	B	A	A	B	B	B	B	A	B	A	A	B	B	A	B	A	A	A	B	A	A	A	B	B	B	A	B	B	A	B	A	B	B	A	B
Ra_c58279_684	TG07072A	IWB52303	2A	36.6		2A	145.08							A	B	A	A	B	B	B	B	B	A	A	A	B	B	B	B	A	A	A	B	A	A	H	B	B	B	A	B	B	A	B	A	B	B	A	A
Ra_c58279_702	TG18882A	IWB52304	2A	36.6		2A	144.38							A	B	A	A	B	B	B	B	B	A	A	A	B	B	B	B	A	A	A	B	A	A	H	B	B	B	A	B	B	A	B	A	B	B	A	A
wsnp_Ex_c5412_9564346	TG22812A	IWA4213	2A	36.6		2A	143.07							A	B	A	A	B	B	B	B	B	A	A	A	B	B	B	B	A	A	A	B	A	A	H	B	B	B	A	B	B	A	B	A	B	B	A	A
wsnp_Ex_c5412_9564478	TG32492A	IWA4214	2A	36.6		2A	143.37							A	B	A	A	B	B	B	B	B	A	A	A	B	B	B	B	A	A	A	B	A	A	H	B	B	B	A	B	B	A	B	A	B	B	A	A
Tdurum_contig55610_784	TG35412A	IWB72463	2A	39.4		2A	145.8							A	B	A	A	B	B	B	B	B	A	A	A	B	B	A	B	A	A	A	B	A	A	H	B	B	B	A	B	B	A	B	A	B	B	A	A
Kukri_c1728_1876	TG3469	IWB41737	2A	42.2		2A	154.95							A	B	A	A	B	A	B	B	B	A	A	A	B	B	A	B	A	A	A	B	A	A	-	B	B	B	A	B	B	A	B	A	B	B	A	A
BS00091830_51	TG15122A	IWB11734	2A	46.1		2A	159.32	2A	48.1					A	B	A	A	B	A	B	B	A	A	A	A	B	B	A	B	A	A	A	B	A	A	A	B	B	B	A	B	B	A	B	A	B	B	A	A
wsnp_Ex_c59373_60260876	TG32582A	IWA4385	2A	46.1		2A	159.24	2A	48.1					A	B	A	A	B	A	B	B	A	A	A	A	B	B	A	B	A	A	A	B	A	A	A	B	B	B	A	B	B	A	B	A	B	B	A	A
Kukri_c56203_965	TG28602A	IWB46583	2A	46.6		2A	158.4			2A	82.5246			A	B	A	A	B	A	B	B	A	A	A	A	B	B	A	B	A	A	A	B	A	A	A	B	B	B	A	B	B	A	B	A	B	B	A	A
BS00083146_51	TG25532A	IWB11289	2A	53.9		2A	176.33	2A	59.7					A	B	A	A	B	A	B	B	B	A	A	A	B	B	A	B	A	A	A	B	A	A	A	B	B	B	A	A	B	A	B	A	B	B	A	A
wsnp_Ex_c15822_24204224	TG35572A	IWA2067	2A	53.9		2A	176.33	2A	58.9					A	B	A	A	B	A	B	B	B	A	A	A	B	B	A	B	A	A	A	B	A	A	A	B	B	B	A	A	B	A	B	A	B	B	A	A
wsnp_Ku_c15567_24224486	TG01852A	IWA6566	2A	55.6		2A	179.17	2A	59.7					A	B	A	A	B	A	B	B	A	A	A	A	B	B	A	B	A	A	A	B	A	A	H	B	B	B	A	A	B	A	B	A	B	B	A	A
TA004602-1630	TG0877	IWB65859	2A	55.6		2A	179.17	2A	59.7					A	B	A	A	B	A	B	B	A	A	A	A	B	B	A	B	A	A	A	B	A	A	H	B	B	B	A	A	B	A	B	A	B	B	A	A
Tdurum_contig47258_1039	TG20912A	IWB71778	2A	55.6		2A	172.62	2A	59.7					A	B	A	A	B	A	B	B	A	A	A	A	B	B	A	B	A	A	A	B	A	A	H	B	B	B	A	A	B	A	B	A	B	B	A	A
wsnp_Ku_c15567_24223777	TG4610	IWA6564	2A	55.6		2A	179.17	2A	59.7					A	B	A	A	B	A	B	B	A	A	A	A	B	B	A	B	A	A	A	B	A	A	-	B	B	B	A	A	B	A	B	A	B	B	A	A
Tdurum_contig82812_213	TG09482A	IWB73597	2A	61.9		2A	190.25	2A	64.3			2A	88.9195	A	B	A	A	B	A	B	B	A	A	A	A	A	B	A	B	A	A	A	B	A	B	H	B	A	B	A	A	B	A	B	A	B	B	A	A
GENE-1365_255	TG12212A	IWB32426	2A	61.9		2A	187.82					2A	88.9195	A	B	A	A	B	A	B	B	A	A	A	A	A	B	A	B	A	A	A	B	A	B	H	B	A	B	A	A	B	A	B	A	B	B	A	A
Tdurum_contig5311_67	TG31132A	IWB72304	2A	61.9		2A	189.19	2A	64.3			2A	88.9195	A	B	A	A	B	A	B	B	A	A	A	A	A	B	A	B	A	A	A	B	A	B	H	B	A	B	A	A	B	A	B	A	B	B	A	A
wsnp_BG314532A_Ta_2_1	TG31662A	IWA562	2A	61.9		2A	187.82					2A	87.4452	A	B	A	A	B	A	B	B	A	A	A	A	A	B	A	B	A	A	A	B	A	B	H	B	A	B	A	A	B	A	B	A	B	B	A	A
Tdurum_contig9731_121	TG01492A	IWB73981	2A	62.5		2A	186.1	2A	64.3			2A	88.9195	A	B	A	A	B	A	B	B	B	A	A	A	A	B	A	B	A	A	A	B	A	B	H	B	A	B	A	A	B	A	B	A	B	B	A	A
RAC875_c20700_853	TG07432A	IWB55048	2A	62.5		2A	186.95	2A	64.3					A	B	A	A	B	A	B	B	B	A	A	A	A	B	A	B	A	A	A	B	A	B	H	B	A	B	A	A	B	A	B	A	B	B	A	A
BS00039983_51	TG14462A	IWB8202	2A	62.5		2A	190.25					2A	88.9195	A	B	A	A	B	A	B	B	B	A	A	A	A	B	A	B	A	A	A	B	A	B	H	B	A	B	A	A	B	A	B	A	B	B	A	A
Excalibur_c15733_252	TG15662A	IWB22683	2A	62.5		2A	186.95	2A	64.3			2A	88.9195	A	B	A	A	B	A	B	B	B	A	A	A	A	B	A	B	A	A	A	B	A	B	-	B	A	B	A	A	B	A	B	A	B	B	A	A
Excalibur_rep_c111743_194	TG1643	IWB30556	2A	62.5		2A	186.95	2A	64.3			2A	88.9195	A	B	A	A	B	A	B	B	B	A	A	A	A	B	A	B	A	A	A	B	A	B	H	B	A	B	A	A	B	A	B	A	B	B	A	A
BS00036767_51	TG24932A	IWB8065	2A	62.5		2A	186.1					2A	88.9195	A	B	A	A	B	A	B	B	B	A	A	A	A	B	A	B	A	A	A	B	A	B	H	B	A	B	A	A	B	A	B	A	B	B	A	A
RAC875_c13116_541	TG29082A	IWB53662	2A	62.5		2A	186.95	2A	64.3			2A	88.9195	A	B	A	A	B	A	B	B	B	A	A	A	A	B	A	B	A	A	A	B	A	B	H	B	A	B	A	A	B	A	B	A	B	B	A	A
Tdurum_contig48302_532	TG31022A	IWB71879	2A	62.5		2A	186.95	2A	64.3			2A	88.9195	A	B	A	A	B	A	B	B	B	A	A	A	A	B	A	B	A	A	A	B	A	B	-	B	A	B	A	A	B	A	B	A	B	B	A	A
Kukri_rep_c83485_398	TG41312A	IWB50422	2A	62.5		2A	186.1					2A	88.9195	A	B	A	A	B	A	B	B	B	A	A	A	A	B	A	B	A	A	A	B	A	B	H	B	A	B	A	A	B	A	B	A	B	B	A	A
wsnp_Ex_c1782_3365844	TG44852A	IWA2259	2A	63		2A	204.1							A	B	A	A	B	A	B	B	B	A	A	A	A	B	A	B	A	A	A	B	A	B	H	B	A	B	A	A	B	A	B	A	B	B	A	A
BobWhite_rep_c62964_873	TG24402A	IWB5321	2A	63		2A	204.1							A	B	A	A	B	A	B	B	B	A	A	A	A	B	A	B	A	A	A	B	A	B	H	B	A	B	A	A	B	A	B	A	B	B	A	A
TA003045-1227	TG0871	IWB65638	2A	63		2A	206.29							A	B	A	A	B	A	B	B	B	A	A	A	A	B	A	B	A	A	A	B	A	B	H	B	A	B	A	A	B	A	B	A	B	B	A	A
wsnp_Ex_rep_c101866_87158671	TG23082A	IWA5037	2A	63		2A	204.1							A	B	A	A	B	A	B	B	B	A	A	A	A	B	A	B	A	A	A	B	A	B	-	B	A	B	A	A	B	A	B	A	B	B	A	A
wsnp_Ex_c12219_19526749	TG44692A	IWA1597	2A	63		2A	207.38							A	B	A	A	B	A	B	B	B	A	A	A	A	B	A	B	A	A	A	B	A	B	-	B	A	B	A	A	B	A	B	A	B	B	A	A
Kukri_c45015_145	TG47792A	IWB45502	2A	63		2A	207.38							A	B	A	A	B	A	B	B	B	A	A	A	A	B	A	B	A	A	A	B	A	B	H	B	A	B	A	A	B	A	B	A	B	B	A	A
wsnp_Ex_c60588_60977198	TG10652A	IWA4410	2A	63.6		2A	204.69	2A	64.3					A	B	A	A	B	A	B	B	B	A	A	A	A	B	A	B	A	A	A	B	A	B	H	B	A	B	A	A	B	A	B	A	B	B	A	A
RFL_Contig3916_275	TG30312A	IWB64536	2A	63.6		2A	199.25	2A	64.3			2A	93.4346	A	B	A	A	B	A	B	B	B	A	A	A	A	B	A	B	A	A	A	B	A	B	H	B	A	B	A	A	B	A	B	A	B	B	A	A
wsnp_Ex_rep_c69124_68035485	TG32972A	IWA5585	2A	63.6		2A	204.69	2A	64.3					A	B	A	A	B	A	B	B	B	A	A	A	A	B	A	B	A	A	A	B	A	B	H	B	A	B	A	A	B	A	B	A	B	B	A	A
Kukri_c24852_466	TG17792A	IWB43042	2A	64.2		2A	193.47	2A	64.3			2A	90.0252	A	B	A	A	B	A	B	B	B	A	A	A	A	B	A	B	A	A	A	B	A	B	H	B	A	B	A	A	B	A	B	A	B	B	A	A
RAC875_c24517_558	TG19262A	IWB55668	2A	64.2		2A	193.47	2A	64.3			2A	90.0252	A	B	A	A	B	A	B	B	B	A	A	A	A	B	A	B	A	A	A	B	A	B	H	B	A	B	A	A	B	A	B	A	B	B	A	A
BS00036766_51	TG36952A	IWB8064	2A	64.2		2A	186.1	2A	64.3			2A	88.9195	A	B	A	A	B	A	B	B	B	A	A	A	A	B	A	B	A	A	A	B	A	B	H	B	A	B	A	A	B	A	B	A	B	B	A	A
BS00021739_51	TG02652A	IWB6749	2A	64.7		2A	271.83	2A	64.3			2A	90.7624	A	B	A	A	B	A	B	B	A	A	A	A	A	B	A	B	A	A	A	B	A	B	H	B	A	B	A	A	B	A	B	A	B	B	A	A
BS00079443_51	TG0361	IWB11079	2A	64.7		2A	271.83	2A	64.3			2A	90.7624	A	B	A	A	B	A	B	B	A	A	A	A	A	B	A	B	A	A	A	B	A	B	H	B	A	B	A	A	B	A	B	A	B	B	A	A
RAC875_rep_c71350_1712	TG30082D	IWB62779	2A	64.7		2A	193.38	2A	64.3			2A	90.7624	A	B	A	A	B	A	B	B	A	A	A	A	A	B	A	B	A	A	A	B	A	B	H	B	A	B	A	A	B	A	B	A	B	B	A	A
RAC875_rep_c73925_276	TG35142A	IWB62989	2A	64.7		2A	271.83	2A	64.3			2A	90.7624	A	B	A	A	B	A	B	B	A	A	A	A	A	B	A	B	A	A	A	B	A	B	H	B	A	B	A	A	B	A	B	A	B	B	A	A
RAC875_rep_c119471_174	TG30052A	IWB62501	2A	65.3		2A	213.9	2A	64.3					A	B	A	A	B	A	B	B	A	A	A	A	A	B	A	B	A	A	A	B	A	B	H	B	A	B	A	A	B	A	B	A	B	B	A	A
wsnp_Ex_rep_c67264_65795361	TG4578	IWA5378	2A	65.3		2A	232.94	2A	65.1					A	B	A	A	B	A	B	B	A	A	A	A	A	B	A	B	A	A	A	B	A	B	H	B	A	B	A	A	B	A	B	A	B	B	A	A
Ku_c59581_1412	TG06012A	IWB39681	2A	65.9		2A	253.86	2A	65.1	2A	107.956			A	B	A	A	B	A	B	B	A	A	A	A	A	B	A	B	A	A	A	B	A	B	H	B	A	B	A	A	B	A	B	A	B	B	A	A
Ra_c22880_760	TG07032A	IWB51504	2A	65.9		2A	241.1	2A	65.1					A	B	A	A	B	A	B	B	A	A	A	A	A	B	A	B	A	A	A	B	A	B	H	B	A	B	A	A	B	A	B	A	B	B	A	A
Ra_c71628_188	TG07112A	IWB52548	2A	65.9		2A	241.1	2A	65.1					A	B	A	A	B	A	B	B	A	A	A	A	A	B	A	B	A	A	A	B	A	B	H	B	A	B	A	A	B	A	B	A	B	B	A	A
RAC875_c41194_218	TG07722A	IWB57685	2A	65.9		2A	253.86	2A	65.1	2A	107.956			A	B	A	A	B	A	B	B	A	A	A	A	A	B	A	B	A	A	A	B	A	B	H	B	A	B	A	A	B	A	B	A	B	B	A	A
wsnp_Ex_rep_c103255_88258450	TG23102A	IWA5092	2A	65.9		2A	235.35	2A	65.1					A	B	A	A	B	A	B	B	A	A	A	A	A	B	A	B	A	A	A	B	A	B	H	B	A	B	A	A	B	A	B	A	B	B	A	A
wsnp_Ex_rep_c66615_64916512	TG23142A	IWA5273	2A	65.9		2A	249.92	2A	65.1	2A	107.956			A	B	A	A	B	A	B	B	A	A	A	A	A	B	A	B	A	A	A	B	A	B	H	B	A	B	A	A	B	A	B	A	B	B	A	A
wsnp_Ex_rep_c66809_65185215	TG23162B	IWA5306	2A	65.9		2A	253.35	2A	65.1	2A	107.956			A	B	A	A	B	A	B	B	A	A	A	A	A	B	A	B	A	A	A	B	A	B	H	B	A	B	A	A	B	A	B	A	B	B	A	A
JD_c2056_506	TG27852A	IWB37169	2A	65.9		2A	234.67							A	B	A	A	B	A	B	B	A	A	A	A	A	B	A	B	A	A	A	B	A	B	-	B	A	B	A	A	B	A	B	A	B	B	A	A
GENE-1350_36	TG39242A	IWB32405	2A	65.9		2A	241.1	2A	65.1					A	B	A	A	B	A	B	B	A	A	A	A	A	B	A	B	A	A	A	B	A	B	H	B	A	B	A	A	B	A	B	A	B	B	A	A
wsnp_Ex_rep_c66615_64916114	TG45742A	IWA5272	2A	65.9		2A	249.92	2A	65.1	2A	107.956			A	B	A	A	B	A	B	B	A	A	A	A	A	B	A	B	A	A	A	B	A	B	H	B	A	B	A	A	B	A	B	A	B	B	A	A
wsnp_Ex_c31900_40635609	TG13322A	IWA3368	2A	66.5		2A	250.83			2A	107.956			A	B	A	A	B	A	B	B	A	A	A	A	A	B	A	B	A	A	A	B	A	B	H	B	A	B	A	A	B	A	B	A	B	B	A	A
IAAV444	TG16912A	IWB34874	2A	66.5		2A	258.62			2A	107.956			A	B	A	A	B	A	B	B	A	A	A	A	A	B	A	B	A	A	A	B	A	B	H	B	A	B	A	A	B	A	B	A	B	B	A	A
wsnp_Ex_c25057_34318425	TG2252	IWA2948	2A	66.5		2A	258.62			2A	107.956			A	B	A	A	B	A	B	B	A	A	A	A	A	B	A	B	A	A	A	B	A	B	H	B	A	B	A	A	B	A	B	A	B	B	A	A
BS00032606_51	TG33942A	IWB7897	2A	66.5		2A	259.16			2A	105.27			A	B	A	A	B	A	B	B	A	A	A	A	A	B	A	B	A	A	A	B	A	B	A	B	A	B	A	A	B	A	B	A	B	B	A	A
BS00041707_51	TG0303	IWB8286	2A	67.6		2A	271.06	2A	65.8					A	B	A	A	B	A	B	B	B	A	A	A	A	B	A	B	A	A	A	B	A	B	H	B	A	B	A	A	B	A	B	A	B	B	A	A
wsnp_BE403597A_Ta_2_1	TG09712A	IWA32	2A	67.6		2A	271.06	2A	65.8					A	B	A	A	B	A	B	B	B	A	A	A	A	B	A	B	A	A	A	B	A	B	H	B	A	B	A	A	B	A	B	A	B	B	A	A
Excalibur_c1793_97	TG12032A	IWB23044	2A	67.6		2A	285.34	2A	67.4					A	B	A	A	B	A	B	B	B	A	A	A	A	B	A	B	A	A	A	B	A	B	H	B	A	B	A	A	B	A	B	A	B	B	A	A
BS00062756_51	TG14672A	IWB8916	2A	67.6		2A	220.68							A	B	A	A	B	A	B	B	B	A	A	A	A	B	A	B	A	A	A	B	A	B	H	B	A	B	A	A	B	A	B	A	B	B	A	A
BS00085765_51	TG15072A	IWB11422	2A	67.6		2A	285.34	2A	65.8					A	B	A	A	B	A	B	B	B	A	A	A	A	B	A	B	A	A	A	B	A	B	H	B	A	B	A	A	B	A	B	A	B	B	A	A
Kukri_c15489_626	TG28122A	IWB41389	2A	67.6		2A	214.86							A	B	A	A	B	A	B	B	B	A	A	A	A	B	A	B	A	A	A	B	A	B	H	B	A	B	A	A	B	A	B	A	B	B	A	A
BS00067806_51	TG37442A	IWB10154	2A	67.6		2A	219.34	2A	65.8					A	B	A	A	B	A	B	B	B	A	A	A	A	B	A	B	A	A	A	B	A	B	H	B	A	B	A	A	B	A	B	A	B	B	A	A
RAC875_c63975_307	TG42462A	IWB59834	2A	67.6		2A	285.34	2A	67.4					A	B	A	A	B	A	B	B	B	A	A	A	A	B	A	B	A	A	A	B	A	B	H	B	A	B	A	A	B	A	B	A	B	B	A	A
Excalibur_c47535_389	TG04572A	IWB26874	2A	68.1		2A	289.77	2A	66.6					A	B	A	A	B	A	B	B	B	A	A	A	A	B	A	B	A	A	A	B	A	B	H	B	A	B	A	A	B	A	B	A	B	B	A	A
RAC875_c39665_175	TG07702A	IWB57539	2A	68.1		2A	220.68							A	B	A	A	B	A	B	B	B	A	A	A	A	B	A	B	A	A	A	B	A	B	B	B	A	B	A	A	B	A	B	A	B	B	A	A
BS00055514_51	TG14582A	IWB8665	2A	68.1		2A	220.68							A	B	A	A	B	A	B	B	B	A	A	A	A	B	A	B	A	A	A	B	A	B	H	B	A	B	A	A	B	A	B	A	B	B	A	A
wsnp_BE406351A_Ta_2_2	TG2167	IWA70	2A	68.1		2A	279.45	2A	67.4					A	B	A	A	B	A	B	B	B	A	A	A	A	B	A	B	A	A	A	B	A	B	H	B	A	B	A	A	B	A	B	A	B	B	A	A
Excalibur_c5346_2716	TG26642A	IWB27389	2A	68.1		2A	220.68							A	B	A	A	B	A	B	B	B	A	A	A	A	B	A	B	A	A	A	B	A	B	H	B	A	B	A	A	B	A	B	A	B	B	A	A
Kukri_c57491_156	TG4093	IWB46663	2A	68.1		2A	253.35	2A	65.1					A	B	A	A	B	A	B	B	B	A	A	A	A	B	A	B	A	A	A	B	A	B	B	B	A	B	A	A	B	A	B	A	B	B	A	A
Tdurum_contig30451_88	TG43642A	IWB70024	2A	68.1		2A	295.06							A	B	A	A	B	A	B	B	B	A	A	A	A	B	A	B	A	A	A	B	A	B	H	B	A	B	A	A	B	A	B	A	B	B	A	A
CAP11_c1716_97	TG15272B	IWB12716	2A	68.7		2A	265.67	2A	65.1	2A	107.956			A	B	A	A	B	A	B	B	B	A	A	A	A	B	A	B	A	A	A	B	A	B	A	B	A	B	A	A	B	A	B	A	B	B	A	A
BobWhite_c4743_63	TG24302A	IWB3592	2A	68.7		2A	275.04	2A	66.6					A	B	A	A	B	A	B	B	B	A	A	A	A	B	A	B	A	A	A	B	A	B	A	B	A	B	A	A	B	A	B	A	B	B	A	A
Excalibur_c84687_162	TG26852A	IWB29111	2A	68.7		2A	268.03	2A	65.8					A	B	A	A	B	A	B	B	B	A	A	A	A	B	A	B	A	A	A	B	A	B	A	B	A	B	A	A	B	A	B	A	B	B	A	A
wsnp_Ex_c28204_37349164	TG32232A	IWA3151	2A	68.7		2A	285.41	2A	67.4			2A	104.86	A	B	A	A	B	A	B	B	B	A	A	A	A	B	A	B	A	A	A	B	A	B	A	B	A	B	A	A	B	A	B	A	B	B	A	A
wsnp_Ex_c47370_52604482	TG35612A	IWA3992	2A	68.7		2A	262.05	2A	65.8					A	B	A	A	B	A	B	B	B	A	A	A	A	B	A	B	A	A	A	B	A	B	A	B	A	B	A	A	B	A	B	A	B	B	A	A
Excalibur_c28017_641	TG00452A	IWB24660	2A	69.3		2A	289.77	2A	66.6					A	B	A	A	B	A	B	B	B	A	A	A	A	B	A	B	A	A	A	B	A	B	H	B	A	B	A	A	B	A	B	A	B	B	A	A
GENE-1213_138	TG00622D	IWB32305	2A	69.3		2A	219.34	2A	65.8					A	B	A	A	B	A	B	B	B	A	A	A	A	B	A	B	A	A	A	B	A	B	H	B	A	B	A	A	B	A	B	A	B	B	A	A
BS00040337_51	TG14472A	IWB8221	2A	69.3		2A	279.45	2A	67.4					A	B	A	A	B	A	B	B	B	A	A	A	A	B	A	B	A	A	A	B	A	B	H	B	A	B	A	A	B	A	B	A	B	B	A	A
Kukri_c9713_1999	TG18492A	IWB48460	2A	69.3		2A	279.45	2A	67.4					A	B	A	A	B	A	B	B	B	A	A	A	A	B	A	B	A	A	A	B	A	B	H	B	A	B	A	A	B	A	B	A	B	B	A	A
RAC875_c992_718	TG1986	IWB61279	2A	69.3		2A	279.45	2A	67.4					A	B	A	A	B	A	B	B	B	A	A	A	A	B	A	B	A	A	A	B	A	B	H	B	A	B	A	A	B	A	B	A	B	B	A	A
BS00049644_51	TG25062A	IWB8551	2A	69.3		2A	295.56	2A	66.6					A	B	A	A	B	A	B	B	B	A	A	A	A	B	A	B	A	A	A	B	A	B	H	B	A	B	A	A	B	A	B	A	B	B	A	A
wsnp_BE406351A_Ta_2_3	TG31602A	IWA71	2A	69.3		2A	281.38	2A	67.4					A	B	A	A	B	A	B	B	B	A	A	A	A	B	A	B	A	A	A	B	A	B	H	B	A	B	A	A	B	A	B	A	B	B	A	A
CAP12_c6044_69	TG37972A	IWB13477	2A	69.3		2A	271.06	2A	65.8					A	B	A	A	B	A	B	B	B	A	A	A	A	B	A	B	A	A	A	B	A	B	H	B	A	B	A	A	B	A	B	A	B	B	A	A
BS00040336_51	TG46892A	IWB8220	2A	69.3		2A	219.34	2A	65.8					A	B	A	A	B	A	B	B	B	A	A	A	A	B	A	B	A	A	A	B	A	B	H	B	A	B	A	A	B	A	B	A	B	B	A	A
wsnp_CAP8_c2677_1394934	TG48282A	IWA1174	2A	69.3		2A	289.97	2A	66.6					A	B	A	A	B	A	B	B	B	A	A	A	A	B	A	B	A	A	A	B	A	B	H	B	A	B	A	A	B	A	B	A	B	B	A	A
BobWhite_c28819_517	TG13732A	IWB2233	2A	69.8		2A	285.34	2A	67.4					A	B	A	A	B	A	B	B	B	A	A	A	A	B	A	B	A	A	A	B	A	B	H	B	A	B	A	A	B	A	B	A	B	B	A	A
Tdurum_contig10579_790	TG35262A	IWB66616	2A	69.8		2A	285.34	2A	65.8					A	B	A	A	B	A	B	B	B	A	A	A	A	B	A	B	A	A	A	B	A	B	-	B	A	B	A	A	B	A	B	A	B	B	A	A
BobWhite_c28819_733	TG36182A	IWB2234	2A	69.8		2A	285.34	2A	65.8					A	B	A	A	B	A	B	B	B	A	A	A	A	B	A	B	A	A	A	B	A	B	H	B	A	B	A	A	B	A	B	A	B	B	A	A
Kukri_c11327_977	TG47722A	IWB40575	2A	70.4		2A	259.54							A	B	A	A	B	A	B	B	B	A	A	A	A	B	A	B	A	A	A	B	A	B	H	B	A	B	A	A	B	A	B	A	B	B	A	A
BobWhite_c6356_87	TG13882A	IWB4148	2A	71.5										A	B	B	A	B	A	B	B	B	A	B	A	A	B	A	B	A	A	A	B	A	B	H	B	A	B	A	A	B	A	B	A	B	B	A	A
Ra_c13247_528	TG06982A	IWB51049	2A	73.2		2A	307.42							A	B	B	A	B	A	B	B	B	A	B	A	A	B	A	B	A	A	A	B	A	B	A	B	A	B	A	A	B	A	B	A	B	B	A	A
RAC875_rep_c113120_326	TG08312A	IWB62188	2A	73.2		2A	308.97							A	B	B	A	B	A	B	B	B	A	B	A	A	B	A	B	A	A	A	B	A	B	A	B	A	B	A	A	B	A	B	A	B	B	A	A
Kukri_rep_c69422_54	TG1866	IWB49894	2A	73.2		2A	309.47							A	B	B	A	B	A	B	B	B	A	B	A	A	B	A	B	A	A	A	B	A	B	A	B	A	B	A	A	B	A	B	A	B	B	A	A
wsnp_JD_c514_781859	TG33122A	IWA6089	2A	73.2		2A	309.47							A	B	B	A	B	A	B	B	B	A	B	A	A	B	A	B	A	A	A	B	A	B	A	B	A	B	A	A	B	A	B	A	B	B	A	A
Excalibur_rep_c69799_1999	TG39122A	IWB31087	2A	73.2		2A	308.97							A	B	B	A	B	A	B	B	B	A	B	A	A	B	A	B	A	A	A	B	A	B	A	B	A	B	A	A	B	A	B	A	B	B	A	A
GENE-1792_560	TG39292A	IWB32663	2A	73.2		2A	309.47							A	B	B	A	B	A	B	B	B	A	B	A	A	B	A	B	A	A	A	B	A	B	A	B	A	B	A	A	B	A	B	A	B	B	A	A
wsnp_Ex_c21409_30544027	TG10202A	IWA2612	2A	74.3		2A	319.3	2A	79.4					A	B	B	A	B	A	B	B	B	A	B	A	A	B	A	B	A	A	A	B	A	B	A	B	A	B	A	A	B	A	B	A	B	B	A	A
IAAV2218	TG16822A	IWB34517	2A	76.6		2A	353.32	2A	80.2					A	B	B	A	B	A	B	B	B	A	B	A	A	B	A	B	A	A	A	B	A	B	A	B	A	B	A	A	B	A	B	A	B	B	A	A
wsnp_Ex_c10084_16572374	TG21982A	IWA1275	2A	76.6		2A	360.76	2A	80.2					A	B	B	A	B	A	B	B	B	A	B	A	A	B	A	B	A	A	A	B	A	B	A	B	A	B	A	A	B	A	B	A	B	B	A	A
BobWhite_c3833_815	TG33722A	IWB2961	2A	76.6		2A	360.92							A	B	B	A	B	A	B	B	B	A	B	A	A	B	A	B	A	A	A	B	A	B	H	B	A	B	A	A	B	A	B	A	B	B	A	A
BobWhite_c17403_635	TG36012A	IWB1036	2A	76.6		2A	399.15	2A	80.2					A	B	B	A	B	A	B	B	B	A	B	A	A	B	A	B	A	A	A	B	A	B	A	B	A	B	A	A	B	A	B	A	B	B	A	A
Excalibur_c6660_746	TG38832A	IWB28454	2A	76.6		2A	356.48	2A	80.2			2A	132.78	A	B	B	A	B	A	B	B	B	A	B	A	A	B	A	B	A	A	A	B	A	B	A	B	A	B	A	A	B	A	B	A	B	B	A	A
Kukri_c29170_702	TG40502A	IWB43664	2A	76.6		2A	416.71	2A	80.2					A	B	B	A	B	A	B	B	B	A	B	A	A	B	A	B	A	A	A	B	A	B	A	B	A	B	A	A	B	A	B	A	B	B	A	A
CAP12_rep_c6956_169	TG37992A	IWB13648	2A	77.1		2A	352.66	2A	80.2					A	B	B	A	B	A	B	B	B	A	B	A	A	B	A	B	A	A	A	B	A	B	-	B	A	B	A	A	B	A	B	A	B	B	A	A
BS00083497_51	TG25542A	IWB11302	2A	77.7		2A	352.09							A	B	B	A	B	A	B	B	B	A	B	A	A	B	A	B	A	A	A	B	A	B	A	B	A	B	A	A	B	A	B	A	B	B	A	A
GENE-3975_114	TG47442A	IWB33700	2A	77.7		2A	352.09							A	B	B	A	B	A	B	B	B	A	B	A	A	B	A	B	A	A	A	B	A	B	A	B	A	B	A	A	B	A	B	A	B	B	A	A
BS00096882_51	TG37782A	IWB11977	2A	78.8		2A	374.9							A	B	B	A	B	A	B	B	B	A	B	A	A	B	A	B	A	A	A	B	A	B	H	B	A	B	A	A	B	A	B	A	B	B	A	A
RAC875_rep_c73777_485	TG42842A	IWB62975	2A	78.8		2A	364.81							A	B	B	A	B	A	B	B	B	A	B	A	A	B	A	B	A	A	A	B	A	B	H	B	A	B	A	A	B	A	B	A	B	B	A	A
Ku_c8927_2075	TG17542A	IWB40126	2A	79.4		2A	353.32	2A	80.2					A	B	B	A	B	A	B	B	B	A	B	A	A	B	A	B	A	A	A	B	A	B	A	B	A	B	A	A	B	A	B	A	B	B	A	A
wsnp_Ku_c8927_15048149	TG01892A	IWA7339	2A	80		2A	360.68	2A	80.2					A	B	B	A	B	A	B	B	B	A	B	A	A	B	A	B	A	A	A	B	A	B	A	B	A	B	A	A	B	A	B	A	B	B	A	A
Kukri_c7193_5892	TG06622D	IWB47527	2A	80		2A	353.73	2A	80.2					A	B	B	A	B	A	B	B	B	A	B	A	A	B	A	B	A	A	A	B	A	B	A	B	A	B	A	A	B	A	B	A	B	B	A	A
RAC875_c52458_454	TG19612A	IWB58832	2A	80		2A	362.51	2A	80.2					A	B	B	A	B	A	B	B	B	A	B	A	A	B	A	B	A	A	A	B	A	B	A	B	A	B	A	A	B	A	B	A	B	B	A	A
BS00089497_51	TG25582A	IWB11614	2A	80		2A	360.92							A	B	B	A	B	A	B	B	B	A	B	A	A	B	A	B	A	A	A	B	A	B	H	B	A	B	A	A	B	A	B	A	B	B	A	A
Kukri_c29170_680	TG28322A	IWB43663	2A	80		2A	362.77	2A	80.2			2A	134.162	A	B	B	A	B	A	B	B	B	A	B	A	A	B	A	B	A	A	A	B	A	B	H	B	A	B	A	A	B	A	B	A	B	B	A	A
GENE-1381_132	TG39262A	IWB32430	2A	80		2A	353.57	2A	80.2					A	B	B	A	B	A	B	B	B	A	B	A	A	B	A	B	A	A	A	B	A	B	A	B	A	B	A	A	B	A	B	A	B	B	A	A
wsnp_be471201A_Ta_1_1	TG44412A	IWA200	2A	80		2A	356.56	2A	80.2			2A	132.78	A	B	B	A	B	A	B	B	B	A	B	A	A	B	A	B	A	A	A	B	A	B	H	B	A	B	A	A	B	A	B	A	B	B	A	A
wsnp_Ra_c10658_17500498	TG11382B	IWA7540	2A	84.4		2A	399.15					2B	155.079	A	B	B	A	B	A	B	B	B	A	B	A	A	B	A	B	A	A	A	B	A	B	-	B	A	B	A	A	B	A	B	A	B	B	A	A
Ku_c13700_1196	TG27932A	IWB38412	2A	85		2A	399.15					2A	149.09	A	B	H	A	B	A	B	B	B	A	B	A	A	B	A	B	A	A	A	B	A	B	A	B	A	B	A	A	B	A	B	A	B	B	A	A
Kukri_rep_c104611_210	TG28772A	IWB49008	2A	85		2A	393.93	2A	85.7			2A	149.09	A	B	H	A	B	A	B	B	B	A	B	A	A	B	A	B	A	A	A	B	A	B	A	B	A	B	A	A	B	A	B	A	B	B	A	A
BobWhite_c34598_70	TG13762A	IWB2708	2A	85		2A	399.15					2A	149.09	A	B	B	A	B	A	B	B	B	A	B	A	A	B	A	B	A	A	A	B	A	B	A	B	A	B	A	A	B	A	B	A	B	B	A	A
Ku_c35823_743	TG2798	IWB39268	2A	85		2A	393.87					2A	148.721	A	B	B	A	B	A	B	B	B	A	B	A	A	B	A	B	A	A	A	B	A	B	A	B	A	B	A	A	B	A	B	A	B	B	A	A
BobWhite_rep_c64766_352	TG3378	IWB5499	2A	85		2A	399.15					2A	149.09	A	B	H	A	B	A	B	B	B	A	B	A	A	B	A	B	A	A	A	B	A	B	A	B	A	B	A	A	B	A	B	A	B	B	A	A
CAP11_c2194_115	TG37932B	IWB12761	2A	85		2A	393.87					2A	149.09	A	B	-	A	B	A	B	B	B	A	B	A	A	B	A	B	A	A	A	B	A	B	A	B	A	B	A	A	B	A	B	A	B	B	A	A
wsnp_Ex_rep_c66358_64543218	TG45722A	IWA5215	2A	85		2A	393.93	2A	85.7			2A	149.09	A	B	H	A	B	A	B	B	B	A	B	A	A	B	A	B	A	A	A	B	A	B	A	B	A	B	A	A	B	A	B	A	B	B	A	A
Ra_c70418_147	TG01042A	IWB52511	2A	85.6		2A	399.15					2A	148.721	A	B	-	A	B	A	B	B	B	A	B	A	A	B	A	B	A	A	A	B	A	B	A	B	A	B	A	A	B	A	B	A	B	B	A	A
wsnp_Ku_c54793_58953037	TG11282A	IWA7166	2A	85.6		2A	384.42					2A	149.09	A	B	B	A	B	A	B	B	B	A	B	A	A	B	A	B	A	A	A	B	A	B	A	B	A	B	A	A	B	A	B	A	B	B	A	A
wsnp_Ex_rep_c66358_64543401	TG32832A	IWA5216	2A	85.6		2A	394.5	2A	83.3			2A	148.721	A	B	B	A	B	A	B	B	B	A	B	A	A	B	A	B	A	A	A	B	A	B	A	B	A	B	A	A	B	A	B	A	B	B	A	A
Excalibur_c3171_416	TG3846	IWB25128	2A	85.6		2A	394.41	2A	83.3			2A	149.09	A	B	B	A	B	A	B	B	B	A	B	A	A	B	A	B	A	A	A	B	A	B	A	B	A	B	A	A	B	A	B	A	B	B	A	A
wsnp_Ex_rep_c66358_64543089	TG01822A	IWA5214	2A	85.6		2A	394.41					2A	149.09	A	B	B	A	B	A	B	B	A	A	B	A	A	B	A	B	A	A	A	B	A	B	A	B	A	B	A	A	B	A	B	A	B	B	A	A
BS00086329_51	TG00302A	IWB11452	2A	86.1		2A	384.42							A	B	B	A	B	A	B	B	B	A	B	A	A	B	A	B	A	A	A	B	A	B	H	B	A	B	A	A	B	A	B	A	B	B	A	A
Excalibur_c47219_186	TG0052	IWB26847	2A	86.1	Vrn-A1	2A	383.15							A	B	B	A	B	A	B	B	B	A	B	A	A	B	A	B	A	A	A	B	A	B	H	B	A	B	A	A	B	A	B	A	B	B	A	A
Excalibur_c41125_360	TG04532A	IWB26200	2A	86.1		2A	384.42							A	B	B	A	B	A	B	B	B	A	B	A	A	B	A	B	A	A	A	B	A	B	H	B	A	B	A	A	B	A	B	A	B	B	A	A
Excalibur_c7282_285	TG04762A	IWB28641	2A	86.1		2A	393.93							A	B	B	A	B	A	B	B	B	A	B	A	A	B	A	B	A	A	A	B	A	B	H	B	A	B	A	A	B	A	B	A	B	B	A	A
IAAV6408	TG05572A	IWB35195	2A	86.1		2A	383.15							A	B	B	A	B	A	B	B	B	A	B	A	A	B	A	B	A	A	A	B	A	B	H	B	A	B	A	A	B	A	B	A	B	B	A	A
wsnp_Ex_c23768_33006588	TG10232A	IWA2835	2A	86.1		2A	384.42							A	B	B	A	B	A	B	B	B	A	B	A	A	B	A	B	A	A	A	B	A	B	H	B	A	B	A	A	B	A	B	A	B	B	A	A
Ku_c69608_894	TG28032A	IWB39857	2A	86.1		2A	399.15							A	B	B	A	B	A	B	B	B	A	B	A	A	B	A	B	A	A	A	B	A	B	H	B	A	B	A	A	B	A	B	A	B	B	A	A
Kukri_c4027_151	TG1809	IWB45016	2A	87.8		2A	391.69					2A	152.038	A	B	H	A	B	A	B	B	A	A	B	A	A	B	A	B	A	A	A	B	A	B	H	B	A	B	A	A	B	A	B	A	B	B	A	A
wsnp_Ku_c16358_25225060	TG46122A	IWA6592	2A	87.8		2A	397.59					2A	152.776	A	B	B	A	B	A	B	B	A	A	B	A	A	B	A	B	A	A	A	B	A	B	B	B	A	B	A	A	B	A	B	A	B	B	A	A
wsnp_Ex_c10751_17505459	TG44632A	IWA1385	2A	88.9		2A	413.76							A	B	B	A	B	A	B	B	B	A	B	A	B	B	A	B	A	A	A	B	A	B	B	B	A	B	A	A	B	A	B	A	B	B	A	A
wsnp_Ra_c32271_41304469	TG01922A	IWA7864	2A	90		2A	406.41							A	B	H	A	B	A	B	B	B	A	B	A	B	B	A	B	A	A	A	B	A	B	A	B	A	B	A	A	B	A	B	A	B	B	A	A
Jagger_c9554_114	TG17232A	IWB36821	2A	90		2A	409.49							A	B	B	A	B	A	B	B	B	A	B	A	B	B	A	B	A	A	A	B	A	B	A	B	A	B	A	A	B	A	B	A	B	B	A	A
wsnp_Ex_c59095_60108185	TG22892A	IWA4375	2A	90		2A	405.07							A	B	-	A	B	A	B	B	B	A	B	A	B	B	A	B	A	A	A	B	A	B	A	B	A	B	A	A	B	A	B	A	B	B	A	A
GENE-2352_964	TG27112A	IWB32895	2A	90		2A	409.49							A	B	B	A	B	A	B	B	B	A	B	A	B	B	A	B	A	A	A	B	A	B	A	B	A	B	A	A	B	A	B	A	B	B	A	A
Tdurum_contig33398_106	TG30902A	IWB70425	2A	91.2		2A	417.05	2A	84.9					A	B	B	A	B	A	B	B	B	A	B	A	B	B	A	B	A	A	A	B	A	B	A	B	A	B	A	A	B	A	B	A	B	B	A	A
BobWhite_c16923_64	TG35982B	IWB973	2A	91.2		2A	346.45	2A	88.1					A	B	B	A	B	A	B	B	B	A	B	A	B	B	A	B	A	A	A	B	A	B	H	B	A	B	A	A	B	A	B	A	B	B	A	A
BS00080752_51	TG03632A	IWB11143	2A	91.7		2A	415.67					2A	154.711	A	B	B	A	B	A	B	B	B	A	B	A	B	B	A	B	A	A	A	B	A	B	A	B	A	B	A	A	B	A	B	A	B	B	A	A
BS00108775_51	TG03862A	IWB12381	2A	91.7		2A	415.67					2A	154.711	A	B	B	A	B	A	B	B	B	A	B	A	B	B	A	B	A	A	A	B	A	B	A	B	A	B	A	A	B	A	B	A	B	B	A	A
wsnp_Ex_c14953_23104041	TG31952A	IWA1960	2A	97.3		2A	427.09	2A	95.8			2A	174.706	A	B	A	A	A	A	B	B	B	B	A	A	B	B	A	B	A	A	A	B	B	B	H	B	A	B	A	A	B	A	B	A	B	B	A	A
RAC875_rep_c107961_348	TG19922A	IWB61745	2A	97.3		2A	425.02							A	B	A	A	A	A	B	B	B	B	A	A	B	B	A	B	A	A	A	B	B	B	H	B	A	B	A	A	B	A	B	A	B	B	A	A
BS00024921_51	TG24822A	IWB7563	2A	101.8		2A	428.11			2A	171.966			A	B	A	A	A	A	B	B	B	B	A	A	B	B	A	B	A	A	A	B	A	B	H	B	A	B	A	A	B	A	B	A	B	B	A	A
RAC875_rep_c69619_78	TG0125	IWB62594	2A	104.1		2A	435.74	2A	95.8					A	B	A	A	A	A	B	B	B	B	A	A	B	A	A	B	A	A	A	B	A	B	-	B	A	B	A	A	B	A	B	A	B	A	A	A
wsnp_Ex_c11827_18986376	TG01582A	IWA1539	2A	104.1		2A	431.89			2B	66.5297			A	B	A	A	A	A	B	B	B	B	A	A	B	A	A	B	A	A	A	B	A	B	H	B	A	B	A	A	B	A	B	A	B	A	A	A
RAC875_rep_c69619_145	TG19972A	IWB62592	2A	104.1		2A	435.49	2A	95.8					A	B	A	A	A	A	B	B	B	B	A	A	B	A	A	B	A	A	A	B	A	B	H	B	A	B	A	A	B	A	B	A	B	A	A	A
RAC875_c19904_308	TG07392A	IWB54915	2A	105.2		2A	442.63	2A	98.1			2A	190.831	A	B	A	A	A	A	B	B	B	B	A	A	B	A	A	B	A	A	A	B	A	B	A	B	A	B	A	A	B	A	B	A	B	A	A	A
wsnp_Ra_c66636_64922359	TG2392	IWA8040	2A	110.8		2A	451.79	2A	102.2			2A	201.797	A	B	A	A	A	A	B	B	B	B	A	A	B	A	A	B	A	A	A	B	A	B	H	B	A	B	A	A	B	A	B	A	B	A	A	A
wsnp_Ex_rep_c70299_69243401	TG10942A	IWA5685	2A	111.3		2A	452.09							A	B	A	A	A	A	B	B	B	B	A	A	B	A	A	B	A	A	A	B	A	B	H	B	A	B	A	A	B	A	B	A	B	A	A	A
Kukri_c25978_561	TG17812A	IWB43225	2A	111.3		2A	452.77							A	B	A	A	A	A	B	B	B	B	A	A	B	A	A	B	A	A	A	B	A	B	-	B	A	B	A	A	B	A	B	A	B	A	A	A
wsnp_Ex_rep_c70299_69243835	TG32992A	IWA5686	2A	111.3		2A	452.09							A	B	A	A	A	A	B	B	B	B	A	A	B	A	A	B	A	A	A	B	A	B	H	B	A	B	A	A	B	A	B	A	B	A	A	A
BS00110128_51	TG25682D	IWB12477	2A	111.9		2A	451.7					2A	200.875	A	B	A	A	A	A	B	B	A	B	A	A	B	A	A	B	A	A	A	B	A	B	H	B	A	B	A	A	B	A	B	A	B	A	A	A
RAC875_c25848_122	TG29322A	IWB55858	2A	113.6		2A	449.31					2A	202.902	A	B	A	A	A	A	B	B	A	B	A	A	B	A	A	B	B	A	A	B	A	B	H	B	A	B	A	A	B	A	B	A	B	A	A	A
IACX5800	TG27722A	IWB36028	2A	114.7		2A	453.22			2A	200.978	2A	203.824	A	B	A	A	A	A	B	B	A	B	A	A	B	A	A	B	B	A	A	B	A	B	H	B	A	B	A	A	B	A	B	A	B	A	A	A
Ra_c3750_1082	TG18852A	IWB51957	2A	115.3		2A	454.85	2A	102.2					A	B	A	A	A	A	B	B	A	B	A	A	B	A	A	B	B	A	A	B	A	B	H	B	A	B	A	A	B	A	B	A	B	A	A	A
Excalibur_c42110_210	TG26482A	IWB26296	2A	115.8		2A	454.85	2A	102.2					A	B	A	A	A	A	B	B	A	B	A	A	B	A	A	B	B	A	A	B	A	B	-	B	A	B	A	A	B	A	B	A	B	A	A	A
Tdurum_contig6086_269	TG21192A	IWB72757	2A	116.9		2A	458.43	2A	103			2A	205.206	A	B	A	A	A	A	B	B	B	B	A	A	B	A	A	B	B	A	A	B	A	B	H	B	A	B	A	A	B	A	B	A	B	A	A	A
BS00030165_51	TG24892A	IWB7758	2A	116.9		2A	458.43	2A	103			2A	205.206	A	B	A	A	A	A	B	B	B	B	A	A	B	A	A	B	B	A	A	B	A	B	H	B	A	B	A	A	B	A	B	A	B	A	A	A
Kukri_rep_c68300_216	TG28832A	IWB49774	2A	116.9		2A	460.42	2A	103			2A	205.206	A	B	A	A	A	A	B	B	B	B	A	A	B	A	A	B	B	A	A	B	A	B	H	B	A	B	A	A	B	A	B	A	B	A	A	A
Tdurum_contig31185_456	TG43692A	IWB70188	2A	117.5		2A	457.72					2A	204.561	A	B	A	A	A	A	B	B	B	B	A	A	B	A	A	B	B	-	A	B	A	B	B	B	A	B	A	A	B	A	B	A	B	A	A	-
BobWhite_c31163_694	TG02212A	IWB2430	2A	120.9		2A	460.15	2A	103			2A	207.602	A	B	A	A	A	A	B	B	B	B	A	A	B	A	B	B	A	A	A	B	A	B	H	B	A	B	A	A	B	A	B	A	B	A	A	A
RFL_Contig927_1591	TG20272A	IWB65315	2A	120.9		2A	460.31	2A	103			2A	206.588	A	B	A	A	A	A	B	B	B	B	A	A	B	A	B	B	A	A	A	B	A	B	H	B	A	B	A	A	B	A	B	A	B	A	A	A
Tdurum_contig82404_354	TG31352A	IWB73568	2A	120.9		2A	460.31	2A	103			2A	206.588	A	B	A	A	A	A	B	B	B	B	A	A	B	A	B	B	A	A	A	B	A	B	H	B	A	B	A	A	B	A	B	A	B	A	A	A
Tdurum_contig84245_154	TG21272A	IWB73663	2A	122		2A	470.68	2A	103.7					A	B	A	A	A	A	B	B	B	B	A	A	B	A	B	B	A	A	A	B	A	B	H	B	A	B	A	A	B	A	B	A	B	A	A	A
tplb0060h04_139	TG44362A	IWB75255	2A	122.5		2A	460.76			2A	201.64	2A	206.864	A	B	A	A	A	A	B	B	A	B	A	A	B	A	B	B	A	A	A	B	A	B	A	B	A	B	A	A	B	A	B	A	B	A	A	A
BS00062732_51	TG03142A	IWB8907	2A	123.1		2A	463.39							A	B	A	A	A	A	B	B	A	B	A	A	B	A	B	B	A	A	A	B	A	B	H	B	A	B	A	A	B	A	B	A	B	A	A	A
RAC875_c9523_328	TG29942A	IWB61119	2A	123.7		2A	467.19			2A	202.96	2A	210.09	A	B	A	A	A	A	B	B	A	B	A	A	B	A	B	B	A	A	A	B	A	B	A	B	A	B	A	A	B	A	B	A	B	A	A	A
TA004785-1734	TG4326	IWB65881	2A	124.2		2A	466.41	2A	117.2					A	B	A	A	A	A	B	B	B	B	A	A	B	A	B	B	A	A	A	B	A	B	A	B	A	B	A	A	B	A	B	A	B	A	A	A
RAC875_c4609_1756	TG19562A	IWB58213	2A	125.3		2A	462.97	2A	105.3					A	B	A	A	-	A	B	B	B	B	A	-	B	A	B	B	-	A	A	B	-	B	A	B	A	B	A	-	B	-	B	A	B	A	-	H
Excalibur_c72359_56	TG04752A	IWB28621	2A	125.9		2A	476.51			2A	201.64			A	B	A	A	A	A	A	B	B	B	A	A	B	A	B	B	A	A	A	B	A	B	A	B	A	B	A	A	B	A	B	A	B	A	A	A
RAC875_c25271_138	TG41892D	IWB55766	2A	127.6		2A	484.87					2A	230.822	A	B	A	A	A	A	A	B	B	B	A	A	B	A	B	B	A	A	A	B	A	B	-	B	A	B	A	A	B	A	B	A	B	A	A	A
RFL_Contig2656_871	TG08532A	IWB64018	2A	129.3		2A	483.15					2A	212.209	A	B	A	A	A	A	A	B	B	B	A	A	B	A	B	B	A	A	A	B	A	B	A	B	A	B	A	A	B	A	B	A	B	A	A	A
Excalibur_c20439_825	TG3837	IWB23479	2A	129.3		2A	484.87					2A	213.591	A	B	A	A	A	A	A	B	B	B	A	A	B	A	B	B	A	A	A	B	A	B	A	B	A	B	A	A	B	A	B	A	B	A	A	A
RAC875_c1706_1888	TG29142A	IWB54406	2A	130.4		2A	485.71	2A	117.2			2A	214.236	A	B	A	A	A	A	A	B	B	B	A	A	B	A	B	B	A	A	A	B	A	B	H	B	A	B	A	A	B	A	B	A	B	A	A	A
BS00023075_51	TG02852A	IWB7413	2A	130.9		2A	484.87	2A	117.2					A	B	A	A	A	A	A	B	B	B	A	A	B	A	B	B	A	A	A	B	A	B	A	B	A	B	A	A	B	A	B	A	B	A	A	A
Tdurum_contig47508_250	TG43812A	IWB71816	2A	130.9		2A	484.87	2A	117.2					A	B	A	A	A	A	A	B	B	B	A	A	B	A	B	B	A	A	A	B	A	B	A	B	A	B	A	A	B	A	B	A	B	A	A	A
CAP12_c575_105	TG03962A	IWB13459	2A	133.2		2A	486.3							A	B	A	A	A	A	A	B	A	B	A	A	B	A	B	B	A	A	A	B	A	B	A	B	A	B	A	A	B	A	B	A	B	A	A	A
BS00096927_51	TG15152A	IWB11978	2A	133.2		2A	486.3							A	B	A	A	A	A	A	B	A	B	A	A	B	A	B	B	A	A	A	B	A	B	A	B	A	B	A	A	B	A	B	A	B	A	A	A
IAAV880	TG17012A	IWB35540	2A	133.2		2A	485.98							A	B	A	A	A	A	A	B	A	B	A	A	B	A	B	B	A	A	A	B	A	B	A	B	A	B	A	A	B	A	B	A	B	A	A	A
wsnp_Ra_c6586_11477949	TG2391	IWA8036	2A	133.2		2A	487.79	2A	117.2					A	B	A	A	A	A	A	B	A	B	A	A	B	A	B	B	A	A	A	B	A	B	A	B	A	B	A	A	B	A	B	A	B	A	A	A
wsnp_Ex_c2137_4014383	TG32102A	IWA2602	2A	133.2		2A	487.79							A	B	A	A	A	A	A	B	A	B	A	A	B	A	B	B	A	A	A	B	A	B	A	B	A	B	A	A	B	A	B	A	B	A	A	A
wsnp_Ex_c2137_4014287	TG48382A	IWA2601	2A	134.3		2A	487.37	2A	106.9					A	B	A	A	A	A	A	B	A	B	A	A	B	A	B	B	A	A	A	B	A	B	A	B	A	B	A	A	B	A	B	A	B	A	A	A
BS00065245_51	TG14772A	IWB9488	2A	135.4		2A	495.28	2A	106.9			2A	216.355	A	B	A	A	A	A	A	B	A	B	A	A	B	A	B	B	A	A	A	B	A	B	H	B	A	B	A	A	B	A	B	A	B	A	A	A
Excalibur_c44834_80	TG16092A	IWB26593	2A	135.4		2A	489.96	2A	117.2					A	B	A	A	A	A	A	B	A	B	A	A	B	A	B	B	A	A	A	B	A	B	H	B	A	B	A	A	B	A	B	A	B	A	A	A
RAC875_c21750_784	TG41812A	IWB55230	2A	135.4		2A	490.11	2A	106.9			2A	216.355	A	B	A	A	A	A	A	B	A	B	A	A	B	A	B	B	A	A	A	B	A	B	H	B	A	B	A	A	B	A	B	A	B	A	A	A
wsnp_Ex_c14639_22695091	TG48312A	IWA1917	2A	135.4		2A	500.71	2A	106.9					A	B	A	A	A	A	A	B	A	B	A	A	B	A	B	B	A	A	A	B	A	B	A	B	A	B	A	A	B	A	B	A	B	A	A	A
wsnp_Ku_c4045_7380115	TG48622A	IWA7031	2A	135.4		2A	500.71	2A	117.2			2A	215.618	A	B	A	A	A	A	A	B	A	B	A	A	B	A	B	B	A	A	A	B	A	B	H	B	A	B	A	A	B	A	B	A	B	A	A	A
BS00011539_51	TG14102A	IWB6431	2A	136		2A	494.76	2A	117.2					A	B	A	A	A	A	A	B	B	B	A	A	B	A	B	B	A	A	A	B	A	B	H	B	A	B	A	A	B	A	B	A	B	A	A	A
Tdurum_contig53038_714	TG21032A	IWB72300	2A	136		2A	488.95	2A	117.2					A	B	A	A	A	A	A	B	B	B	A	A	B	A	B	B	A	A	A	B	A	B	H	B	A	B	A	A	B	A	B	A	B	A	A	A
Tdurum_contig53038_684	TG31122A	IWB72299	2A	136		2A	488.95	2A	117.2					A	B	A	A	A	A	A	B	B	B	A	A	B	A	B	B	A	A	A	B	A	B	H	B	A	B	A	A	B	A	B	A	B	A	A	A
Tdurum_contig50720_482	TG01452A	IWB72114	2A	136.5		2A	502.48	2A	117.2					A	B	A	A	A	A	A	B	B	B	A	A	B	A	B	B	A	A	A	B	A	B	B	B	A	B	A	A	B	A	B	A	B	A	A	A
Tdurum_contig52350_296	TG01462A	IWB72261	2A	136.5		2A	499.77	2A	117.2					A	B	A	A	A	A	A	B	B	B	A	A	B	A	B	B	A	A	A	B	A	B	H	B	A	B	A	A	B	A	B	A	B	A	A	A
Excalibur_c16329_493	TG04262D	IWB22773	2A	136.5		2A	502.21							A	B	H	A	A	A	A	B	B	B	A	A	B	A	B	B	A	A	A	B	A	B	H	B	A	B	A	A	B	A	B	A	B	A	A	A
Excalibur_c7971_712	TG0481	IWB28928	2A	136.5		2A	499.77	2A	106.9					A	B	H	A	A	A	A	B	B	B	A	A	B	A	B	B	A	A	A	B	A	B	H	B	A	B	A	A	B	A	B	A	B	A	A	A
Excalibur_c91176_326	TG04902D	IWB29338	2A	136.5		2A	499.77	2A	117.2					A	B	A	A	A	A	A	B	B	B	A	A	B	A	B	B	A	A	A	B	A	B	H	B	A	B	A	A	B	A	B	A	B	A	A	A
Excalibur_rep_c69149_1588	TG05052A	IWB31036	2A	136.5		2A	502.48							A	B	A	A	A	A	A	B	B	B	A	A	B	A	B	B	A	A	A	B	A	B	B	B	A	B	A	A	B	A	B	A	B	A	A	A
RAC875_c1043_258	TG07212D	IWB53050	2A	136.5		2A	500.71	2A	106.9					A	B	A	A	A	A	A	B	B	B	A	A	B	A	B	B	A	A	A	B	A	B	H	B	A	B	A	A	B	A	B	A	B	A	A	A
RAC875_c35688_178	TG07642A	IWB57096	2A	136.5		2A	500.71							A	B	A	A	A	A	A	B	B	B	A	A	B	A	B	B	A	A	A	B	A	B	H	B	A	B	A	A	B	A	B	A	B	A	A	A
Kukri_c21008_657	TG17752A	IWB42411	2A	136.5		2A	502.48	2A	106.9					A	B	H	A	A	A	A	B	B	B	A	A	B	A	B	B	A	A	A	B	A	B	H	B	A	B	A	A	B	A	B	A	B	A	A	A
Kukri_c44231_1576	TG1812	IWB45415	2A	136.5		2A	499.77	2A	106.9					A	B	A	A	A	A	A	B	B	B	A	A	B	A	B	B	A	A	A	B	A	B	H	B	A	B	A	A	B	A	B	A	B	A	A	A
IAAV6102	TG39602A	IWB35144	2A	136.5		2A	499.77	2A	117.2					A	B	A	A	A	A	A	B	B	B	A	A	B	A	B	B	A	A	A	B	A	B	H	B	A	B	A	A	B	A	B	A	B	A	A	A
Tdurum_contig56321_179	TG48152A	IWB72500	2A	136.5		2A	500.71	2A	106.9					A	B	A	A	A	A	A	B	B	B	A	A	B	A	B	B	A	A	A	B	A	B	H	B	A	B	A	A	B	A	B	A	B	A	A	A
Tdurum_contig8350_243	TG48202A	IWB73637	2A	136.5		2A	502.48	2A	117.2					A	B	A	A	A	A	A	B	B	B	A	A	B	A	B	B	A	A	A	B	A	B	H	B	A	B	A	A	B	A	B	A	B	A	A	A
BS00024643_51	TG36862A	IWB7548	2A	136.5		2A	502.21							A	B	A	A	A	A	A	B	B	B	A	A	B	A	B	B	A	A	A	B	A	B	-	B	A	B	A	A	B	A	B	A	B	A	A	A
BS00087932_51	TG47052A	IWB11535	2A	136.5		2A	502.48	2A	117.2					A	B	A	A	A	A	A	B	B	B	A	A	B	A	B	B	A	A	A	B	A	B	H	B	A	B	A	A	B	A	B	A	B	A	A	A
RAC875_c35688_382	TG19472A	IWB57098	2A	136.5		2A	511.72	2A	106.9					A	B	A	A	A	A	A	B	B	B	A	A	B	A	B	B	A	A	A	B	A	B	H	B	A	B	A	A	B	A	B	A	B	A	A	A
Kukri_c26697_366	TG17832A	IWB43329	2A	136.5		2A	496.35							A	B	H	A	A	A	A	B	B	B	A	A	B	A	B	B	A	A	A	B	A	B	H	B	A	B	A	A	B	A	B	A	B	A	A	A
wsnp_Ex_c3695_6740339	TG45272A	IWA3596	2A	136.5		2A	499.77	2B	131.7					A	B	A	A	A	A	A	B	B	B	A	A	B	A	B	B	A	A	A	B	A	B	A	B	A	B	A	A	B	A	B	A	B	A	A	A
Tdurum_contig52350_902	TG21022A	IWB72264	2A	136.5		2A	499.77	2A	117.2					A	B	A	A	A	A	A	B	B	B	A	A	B	A	B	B	A	A	A	B	A	B	H	B	A	B	A	A	B	A	B	A	B	A	A	A
Excalibur_c62106_387	TG04692A	IWB28098	2A	136.5		2A	502.48	2A	117.2					A	B	H	A	A	A	A	B	B	B	A	A	B	A	B	B	A	A	A	B	A	B	H	B	A	B	A	A	B	A	B	A	B	A	A	A
Kukri_c25632_86	TG17802A	IWB43152	2A	136.5		2A	499.77	2A	106.9					A	B	-	A	A	A	A	B	B	B	A	A	B	A	B	B	A	A	A	B	A	B	H	B	A	B	A	A	B	A	B	A	B	A	A	A
BS00065001_51	TG00211A	IWB9423	2A	136.5		2A	511.72							A	B	A	A	A	A	A	B	B	B	A	A	B	A	B	B	A	A	A	B	A	B	H	B	A	B	A	A	B	A	B	A	B	A	A	A
BS00064813_51	TG0321	IWB9375	2A	136.5		2A	502.48							A	B	H	A	A	A	A	B	B	B	A	A	B	A	B	B	A	A	A	B	A	B	H	B	A	B	A	A	B	A	B	A	B	A	A	A
IAAV5232	TG05522A	IWB34990	2A	136.5		2A	499.77	2A	117.2					A	B	H	A	A	A	A	B	B	B	A	A	B	A	B	B	A	A	A	B	A	B	H	B	A	B	A	A	B	A	B	A	B	A	A	A
RAC875_c35200_230	TG07632D	IWB57054	2A	136.5		2A	502.21							A	B	A	A	A	A	A	B	B	B	A	A	B	A	B	B	A	A	A	B	A	B	H	B	A	B	A	A	B	A	B	A	B	A	A	A
Tdurum_contig14482_1073	TG08992B	IWB68231	2A	136.5		2A	511.72							A	B	A	A	A	A	A	B	B	B	A	A	B	A	B	B	A	A	A	B	A	B	B	B	A	B	A	A	B	A	B	A	B	A	A	A
RFL_Contig5122_974	TG20172B	IWB64898	2A	136.5		2A	511.72	2A	117.2					A	B	A	A	A	A	A	B	B	B	A	A	B	A	B	B	A	A	A	B	A	B	H	B	A	B	A	A	B	A	B	A	B	A	A	A
Tdurum_contig42282_10323	TG20772A	IWB71056	2A	136.5		2A	499.77	2A	106.9					A	B	-	A	A	A	A	B	B	B	A	A	B	A	B	B	A	A	A	B	A	B	H	B	A	B	A	A	B	A	B	A	B	A	A	A
tplb0021g21_595	TG2141	IWB74103	2A	136.5		2A	511.72	2A	117.2					A	B	A	A	A	A	A	B	B	B	A	A	B	A	B	B	A	A	A	B	A	B	H	B	A	B	A	A	B	A	B	A	B	A	A	A
tplb0025l18_1788	TG21472A	IWB74253	2A	136.5		2A	502.48	2A	117.2					A	B	H	A	A	A	A	B	B	B	A	A	B	A	B	B	A	A	A	B	A	B	-	B	A	B	A	A	B	A	B	A	B	A	A	A
wsnp_Ku_c2838_5354231	TG23592A	IWA6839	2A	136.5		2A	511.72	2A	117.2					A	B	A	A	A	A	A	B	B	B	A	A	B	A	B	B	A	A	A	B	A	B	H	B	A	B	A	A	B	A	B	A	B	A	A	A
IAAV7086	TG2754	IWB35287	2A	136.5		2A	511.72							A	B	A	A	A	A	A	B	B	B	A	A	B	A	B	B	A	A	A	B	A	B	H	B	A	B	A	A	B	A	B	A	B	A	A	A
RAC875_c51459_311	TG29632A	IWB58750	2A	136.5		2A	502.21							A	B	H	A	A	A	A	B	B	B	A	A	B	A	B	B	A	A	A	B	A	B	H	B	A	B	A	A	B	A	B	A	B	A	A	A
wsnp_Ex_c10555_17236072	TG31792A	IWA1349	2A	136.5		2A	499.77	2A	106.9					A	B	A	A	A	A	A	B	B	B	A	A	B	A	B	B	A	A	A	B	A	B	H	B	A	B	A	A	B	A	B	A	B	A	A	A
RAC875_c22328_1356	TG35002B	IWB55326	2A	136.5		2A	499.77	2A	106.9					A	B	H	A	A	A	A	B	B	B	A	A	B	A	B	B	A	A	A	B	A	B	H	B	A	B	A	A	B	A	B	A	B	A	A	A
RAC875_c22328_490	TG41822A	IWB55327	2A	136.5		2A	499.77	2A	117.2					A	B	H	A	A	A	A	B	B	B	A	A	B	A	B	B	A	A	A	B	A	B	H	B	A	B	A	A	B	A	B	A	B	A	A	A
Kukri_c50116_107	TG06462A	IWB46049	2A	136.5										A	B	A	A	A	A	A	B	B	B	A	A	B	A	B	B	A	A	A	B	A	B	H	B	A	B	A	A	B	A	B	A	B	A	A	A
RAC875_c96399_610	TG12892A	IWB61157	2A	136.5		2A	488.78	2A	117.2					A	B	A	A	A	A	A	B	B	B	A	A	B	A	B	B	A	A	A	B	A	B	H	B	A	B	A	A	B	A	B	A	B	A	A	A
wsnp_Ku_c16547_25454123	TG33242A	IWA6600	2A	136.5		2A	499.77	2A	106.9					A	B	A	A	A	A	A	B	B	B	A	A	B	A	B	B	A	A	A	B	A	B	H	B	A	B	A	A	B	A	B	A	B	A	A	A
CAP8_c3129_381	TG0402	IWB14668	2A	137.6		2A	511.72	2A	106.9			2A	217.369	A	B	A	A	A	A	A	B	B	B	A	A	B	A	B	B	A	A	A	B	A	B	H	B	A	B	A	A	B	A	B	A	B	A	A	A
RAC875_c27530_860	TG29362D	IWB56077	2A	137.6		2A	497.17					2A	216.355	A	B	A	A	A	A	A	B	B	B	A	A	B	A	B	B	A	A	A	B	A	B	A	B	A	B	A	A	B	A	B	A	B	A	A	A
BobWhite_c42181_327	TG02282A	IWB3216	2A	138.2		2A	489.7	2A	117.2					A	B	A	A	A	A	A	B	A	B	A	A	B	A	B	B	A	A	A	B	A	B	H	B	A	B	A	A	B	A	B	A	B	A	A	A
Kukri_c53501_305	TG06512A	IWB46343	2A	138.8		2A	506.47	2A	117.2					A	B	A	A	A	A	A	B	A	B	A	A	B	A	B	B	A	A	A	B	A	B	H	B	A	B	A	A	B	A	B	A	B	A	A	A
RFL_Contig5277_888	TG20182A	IWB64957	2A	146.6		2A	524.52							A	B	A	A	A	A	A	B	A	B	A	A	A	A	B	B	A	A	A	B	A	B	A	B	A	B	A	A	B	A	B	A	B	A	A	A
RAC875_c1757_530	TG01062A	IWB54502	2A	146.6		2A	541.92							A	B	A	A	A	A	A	B	A	B	A	A	A	A	B	B	A	A	A	B	A	B	B	B	A	B	A	A	B	A	B	A	B	A	A	A
GENE-0762_631	TG16532B	IWB32082	2A	146.6		2A	524.93							A	B	A	A	A	A	A	B	A	B	A	A	A	A	B	B	A	A	A	B	A	B	A	B	A	B	A	A	B	A	B	A	B	A	A	A
RAC875_c35807_1110	TG12762A	IWB57117	2A	148.3		2A	532.99			2A	230.111			A	B	A	A	A	A	A	B	B	B	A	A	A	A	B	B	A	A	A	B	A	B	A	B	A	B	A	A	B	A	B	A	B	A	A	A
wsnp_Ex_rep_c108004_91402649	TG45692A	IWA5161	2A	148.9		2A	523.71							A	B	A	A	A	A	A	B	B	B	A	A	A	A	B	B	A	A	A	B	A	B	H	B	A	B	A	A	B	A	B	A	B	A	A	A
BS00091763_51	TG25612A	IWB11730	2A	148.9		2A	518.62							A	B	A	A	A	A	A	B	B	B	A	A	A	A	B	B	A	A	A	B	A	B	-	B	A	B	A	A	B	A	B	A	B	A	A	A
IAAV5706	TG0068	IWB35077	2A	149.5		2A	526.38							A	B	H	A	A	A	A	B	B	B	A	A	A	A	B	B	A	A	A	B	A	B	H	B	A	B	A	A	B	A	B	A	B	A	A	A
BS00060596_51	TG00192A	IWB8811	2A	155.1		2A	548.03							A	B	A	A	A	A	A	B	B	B	A	A	A	A	B	B	A	A	A	B	A	A	H	B	A	B	B	A	B	A	B	A	B	A	A	A
IAAV2065	TG39432A	IWB34494	2A	155.7		2A	581.82							A	B	A	A	A	A	A	B	B	B	A	A	A	A	B	B	A	A	A	B	A	A	H	B	A	B	B	A	B	A	B	A	B	A	A	A
wsnp_Ex_c3964_7181151	TG45282A	IWA3688	2A	155.7		2A	573.71							A	B	A	A	A	A	A	B	B	B	A	A	A	A	B	B	A	A	A	B	A	A	H	B	A	B	B	A	B	A	B	A	B	A	A	A
BobWhite_c12144_216	TG3591	IWB315	2B	0		2B	21.95	2B	0.8					A	B	B	A	A	B	A	A	A	A	B	B	A	A	B	A	A	B	B	A	B	A	B	A	B	B	B	B	B	B	A	B	B	B	B	B
Tdurum_contig10208_447	TG43382A	IWB66351	2B	0.5		2B	17.14	2B	0.8					A	B	B	A	A	B	A	A	A	A	B	B	A	A	B	A	A	B	B	A	B	A	B	A	B	B	B	B	B	B	A	B	B	B	B	B
Excalibur_c2656_3198	TG04392B	IWB24457	2B	2.2		2B	17.14	2B	1.6			2B	5.33169	A	B	B	A	A	B	A	A	A	A	B	B	A	A	B	A	A	B	B	A	B	A	-	A	B	B	B	B	B	B	A	B	B	B	B	B
IACX6340	TG0580	IWB36143	2B	2.2		2B	16.88	2B	1.6					A	B	B	A	A	B	A	A	A	A	B	B	A	A	B	A	A	B	B	A	B	A	B	A	B	B	B	B	B	B	A	B	B	B	B	B
Excalibur_c29417_400	TG15872B	IWB24834	2B	2.2		2B	17.14	2B	1.6					A	B	B	A	A	B	A	A	A	A	B	B	A	A	B	A	A	B	B	A	B	A	H	A	B	B	B	B	B	B	A	B	B	B	B	B
Excalibur_c29417_499	TG15882B	IWB24835	2B	2.2		2B	17.14	2B	1.6			2B	5.33169	A	B	B	A	A	B	A	A	A	A	B	B	A	A	B	A	A	B	B	A	B	A	H	A	B	B	B	B	B	B	A	B	B	B	B	B
BS00058815_51	TG37172B	IWB8754	2B	2.2		2B	17.14	2B	1.6					A	B	B	A	A	B	A	A	A	A	B	B	A	A	B	A	A	B	B	A	B	A	H	A	B	B	B	B	B	B	A	B	B	B	B	B
Excalibur_c42248_663	TG3859	IWB26314	2B	2.2		2B	16.88	2B	1.6					A	B	B	A	A	B	A	A	A	A	B	B	A	A	B	A	A	B	B	A	B	A	H	A	B	B	B	B	B	B	A	B	B	B	B	B
Kukri_c6306_1151	TG4096	IWB47038	2B	2.2		2B	17.14	2B	1.6					A	B	B	A	A	B	A	A	A	A	B	B	A	A	B	A	A	B	B	A	B	A	H	A	B	B	B	B	B	B	A	B	B	B	B	B
wsnp_Ex_c10961_17803258	TG44642B	IWA1413	2B	2.2		2B	21.36	2B	1.6					A	B	B	A	A	B	A	A	A	A	B	B	A	A	B	A	A	B	B	A	B	A	H	A	B	B	B	B	B	B	A	B	B	B	B	B
GENE-1442_78	TG00632B	IWB32486	2B	2.8		2B	21.36	2B	1.6					A	B	B	A	A	B	A	A	A	A	B	B	A	A	B	A	A	B	B	A	B	A	H	A	B	B	B	B	B	B	A	B	B	A	B	B
wsnp_Ra_c1501_2991585	TG11412B	IWA7633	2B	2.8		2B	21.7	2B	1.6			2B	5.69939	A	B	B	A	A	B	A	A	A	A	B	B	A	A	B	A	A	B	B	A	B	A	B	A	B	B	B	B	B	B	A	B	B	A	B	B
Ex_c525_1401	TG15502B	IWB20867	2B	2.8		2B	17.14	2B	1.6					A	B	B	A	A	B	A	A	A	A	B	B	A	A	B	A	A	B	B	A	B	A	B	A	B	B	B	B	B	B	A	B	B	A	B	B
tplb0034e07_1869	TG21532B	IWB74530	2B	2.8		2B	21.36	2B	0					A	B	B	A	A	B	A	A	A	A	B	B	A	A	B	A	A	B	B	A	B	A	H	A	B	B	B	B	B	B	A	B	B	A	B	B
tplb0034e07_718	TG31482B	IWB74531	2B	2.8		2B	16.88	2B	1.6			2B	5.69939	A	B	B	A	A	B	A	A	A	A	B	B	A	A	B	A	A	B	B	A	B	A	B	A	B	B	B	B	B	B	A	B	B	A	B	B
RAC875_c34512_493	TG07612A	IWB56956	2B	3.3		2B	21.1	2B	2.4			2B	5.69939	A	B	B	A	A	B	A	A	A	A	B	B	A	A	B	A	A	B	B	A	B	B	B	A	B	B	B	B	B	B	A	B	B	A	B	B
RAC875_c34512_685	TG12742D	IWB56957	2B	3.3		2B	21.1	2B	2.4			2B	5.69939	A	B	B	A	A	B	A	A	A	A	B	B	A	A	B	A	A	B	B	A	B	B	B	A	B	B	B	B	B	B	A	B	B	A	B	B
Excalibur_c39493_251	TG04512B	IWB26054	2B	3.9		2B	22.08							A	B	B	A	A	B	A	A	B	A	B	B	A	A	B	A	A	B	B	A	B	B	B	A	B	B	B	B	B	B	A	B	B	A	B	B
Kukri_rep_c97239_133	TG06922B	IWB50555	2B	3.9		2B	21.1	2B	2.4					A	B	B	A	A	B	A	A	B	A	B	B	A	A	B	A	A	B	B	A	B	B	B	A	B	B	B	B	B	B	A	B	B	A	B	B
Excalibur_rep_c107769_116	TG0498	IWB30293	2B	4.4		2B	25.99							A	B	B	A	A	B	A	A	B	A	B	B	A	A	B	A	A	B	B	A	B	B	B	A	B	B	B	B	B	B	A	B	B	A	B	B
BS00023068_51	TG14312B	IWB7407	2B	6.1		2B	26.5					2B	4.68821	A	B	B	A	A	B	A	A	A	A	B	B	A	A	B	A	A	B	B	A	B	B	B	A	B	B	B	B	B	B	A	B	B	A	B	B
GENE-1230_189	TG2709	IWB32315	2B	6.1		2B	26.11					2B	5.69939	A	B	B	A	A	B	A	A	A	A	B	B	A	A	B	A	A	B	B	A	B	B	B	A	B	B	B	B	B	B	A	B	B	A	B	B
Excalibur_c34937_710	TG47292B	IWB25535	2B	6.1		2B	25.99							A	B	B	A	A	B	A	A	A	A	B	B	A	A	B	A	A	B	B	A	B	B	H	A	B	B	B	B	B	B	A	B	B	A	B	B
wsnp_Ra_c1660_3275687	TG11432B	IWA7656	2B	7.2		2B	26.5							A	B	B	A	A	B	A	A	A	A	B	B	A	A	B	A	A	B	B	A	B	B	B	A	B	B	B	B	B	B	A	B	B	A	B	B
Ra_c11464_294	TG18742B	IWB50940	2B	7.2		2B	26.5							A	B	B	A	A	B	A	A	A	A	B	B	A	A	B	A	A	B	B	A	B	B	B	A	B	B	B	B	B	B	A	B	B	A	B	B
Ra_c491_902	TG18862B	IWB52168	2B	7.2		2B	26.11							A	B	B	A	A	B	A	A	A	A	B	B	A	A	B	A	A	B	B	A	B	B	B	A	B	B	B	B	B	B	A	B	B	A	B	B
wsnp_Ex_c1996_3754394	TG22382B	IWA2482	2B	7.2		2B	26.11							A	B	B	A	A	B	A	A	A	A	B	B	A	A	B	A	A	B	B	A	B	B	B	A	B	B	B	B	B	B	A	B	B	A	B	B
RAC875_rep_c109471_154	TG29982B	IWB61884	2B	7.2		2B	26.11							A	B	B	A	A	B	A	A	A	A	B	B	A	A	B	A	A	B	B	A	B	B	B	A	B	B	B	B	B	B	A	B	B	A	B	B
RAC875_rep_c115433_378	TG4278	IWB62322	2B	7.2		2B	26.5							A	B	B	A	A	B	A	A	A	A	B	B	A	A	B	A	A	B	B	A	B	B	B	A	B	B	B	B	B	B	A	B	B	A	B	B
BS00084668_51	TG25562B	IWB11379	2B	7.2		2B	26.11					2B	6.0671	A	B	B	A	A	B	A	A	A	A	B	B	A	A	B	A	A	B	B	A	B	B	B	A	B	B	B	B	B	B	A	B	B	A	B	B
Kukri_c40204_617	TG00912B	IWB45010	2B	7.2		2B	26.76							A	B	B	A	A	B	A	A	A	A	B	B	A	A	B	A	A	B	B	A	B	B	H	A	B	B	B	B	B	B	A	B	B	A	B	B
wsnp_Ex_c326_636368	TG10352B	IWA3407	2B	7.2		2B	17.14							A	B	B	A	A	B	A	A	A	A	B	B	A	A	B	A	A	B	B	A	B	B	B	A	B	B	B	B	B	B	A	B	B	A	B	B
Kukri_c30847_344	TG28342B	IWB43909	2B	7.2		2B	26.76							A	B	B	A	A	B	A	A	A	A	B	B	A	A	B	A	A	B	B	A	B	B	H	A	B	B	B	B	B	B	A	B	B	A	B	B
Excalibur_c30167_243	TG04432A	IWB24938	2B	14		2B	42					2B	10.3876	A	B	A	A	A	B	A	A	A	A	A	B	A	A	B	A	A	B	B	A	B	B	H	A	B	B	B	B	B	B	A	B	B	A	B	B
Kukri_c16758_443	TG47752B	IWB41644	2B	14		2B	50.16					2B	10.3876	A	B	A	A	A	B	A	A	A	A	A	B	A	A	B	A	A	B	B	A	B	B	B	A	B	B	B	B	B	B	A	B	B	A	B	B
Excalibur_c42928_135	TG16072B	IWB26388	2B	14.5		2B	50.16							A	B	A	A	A	B	A	A	B	A	A	B	A	A	B	A	A	B	B	A	B	B	H	A	B	B	B	B	B	B	A	B	B	A	B	B
Excalibur_c841_609	TG38912B	IWB29097	2B	14.5		2B	40.13	2B	16.4					A	B	A	A	H	B	H	H	B	H	A	B	H	A	B	H	H	B	B	H	B	B	B	H	B	B	B	B	B	B	H	B	B	A	B	B
Excalibur_c41459_96	TG04542B	IWB26233	2B	15.6		2B	50.16							A	B	A	A	A	B	A	A	B	A	A	B	A	A	B	A	A	B	B	A	B	B	B	A	B	B	B	B	B	B	A	B	B	A	B	B
Tdurum_contig49928_424	TG09212D	IWB72027	2B	15.6		2B	50.16			2A	24.897	2B	10.3876	A	B	A	A	A	B	A	A	B	A	A	B	A	A	B	A	A	B	B	A	B	B	B	A	B	B	B	B	B	B	A	B	B	A	B	B
Excalibur_rep_c101263_892	TG1640	IWB29704	2B	15.6		2B	63.09	2B	21.2			2B	10.7553	A	B	A	A	A	B	A	A	B	A	A	B	A	A	B	A	A	B	B	A	B	B	B	A	B	B	B	B	B	B	A	B	B	A	B	B
Tdurum_contig20262_440	TG20622B	IWB68861	2B	15.6		2A	45.51					2B	0	A	B	A	A	A	B	A	A	B	A	A	B	A	A	B	A	A	B	B	A	B	B	B	A	B	B	B	B	B	B	A	B	B	A	B	B
RAC875_c2300_1021	TG29252A	IWB55435	2B	15.6		2B	50.16					2B	10.3876	A	B	A	A	A	B	A	A	B	A	A	B	A	A	B	A	A	B	B	A	B	B	B	A	B	B	B	B	B	B	A	B	B	A	B	B
Excalibur_c4748_360	TG3869	IWB26871	2B	15.6		2B	50.16					2B	10.3876	A	B	A	A	A	B	A	A	B	A	A	B	A	A	B	A	A	B	B	A	B	B	B	A	B	B	B	B	B	B	A	B	B	A	B	B
Kukri_c52200_878	TG40892A	IWB46230	2B	16.2		2B	50.16					2B	10.3876	A	B	A	A	A	B	A	A	B	A	A	B	A	A	B	A	A	B	B	A	B	B	B	A	B	B	B	B	B	B	A	B	B	A	B	B
GENE-1018_99	TG05172B	IWB32198	2B	16.8		2B	43.59	2B	17.2			2B	10.3876	A	B	A	A	A	B	A	A	A	A	A	B	A	A	B	A	A	B	B	A	B	B	B	A	B	B	B	B	B	B	A	B	B	A	B	B
Tdurum_contig44328_448	TG30962B	IWB71518	2B	16.8		2A	45.51	2A	10.5			2B	10.3876	A	B	A	A	A	B	A	A	A	A	A	B	A	A	B	A	A	B	B	A	B	B	H	A	B	B	B	B	B	B	A	B	B	A	B	B
BS00061979_51	TG14662B	IWB8851	2B	17.9		2B	63.09							A	B	A	A	A	B	A	A	A	A	A	B	A	A	B	A	A	B	B	A	B	B	H	A	B	B	B	B	B	B	A	B	B	A	B	B
RAC875_c84991_116	TG12875A	IWB60788	2B	18.4		5A	453.41							A	B	A	A	A	B	A	A	A	A	A	B	A	A	B	A	A	B	B	A	B	B	H	A	B	B	B	B	B	B	A	B	B	A	B	B
tplb0058m16_1152	TG21632B	IWB75185	2B	18.4										A	B	A	A	A	B	A	A	A	A	A	B	A	A	B	A	A	B	B	A	B	B	B	A	B	B	B	B	B	B	A	B	B	A	B	B
BobWhite_c1149_539	TG24012B	IWB227	2B	18.4										A	B	A	A	A	B	A	A	A	A	A	B	A	A	B	A	A	B	B	A	B	B	B	A	B	B	B	B	B	B	A	B	B	A	B	B
RAC875_c38003_164	TG42102D	IWB57369	2B	21.2		2B	66.03							A	B	A	A	A	B	A	A	B	A	A	B	A	A	B	A	A	B	B	A	B	B	B	A	B	B	B	B	B	B	A	B	B	A	B	B
tplb0058j01_762	TG31552B	IWB75174	2B	25.7								2B	15.8112	A	B	A	A	A	B	A	A	A	A	A	B	A	A	B	A	A	B	B	A	B	B	B	A	B	B	B	B	B	B	A	B	B	A	B	B
BS00053880_51	TG34002B	IWB8638	2B	25.7										A	B	A	A	A	B	A	A	A	A	A	B	A	A	B	A	A	B	B	A	B	B	H	A	B	B	B	B	B	B	A	B	B	A	B	B
BS00022059_51	TG36692B	IWB6885	2B	25.7										A	B	A	A	A	B	A	A	A	A	A	B	A	A	B	A	A	B	B	A	B	B	B	A	B	B	B	B	B	B	A	B	B	A	B	B
BS00038498_51	TG2495	IWB8132	2B	26.3		2B	78.55							A	B	A	A	A	B	A	A	A	A	A	B	A	A	B	A	A	B	B	A	B	B	B	A	B	B	B	B	B	B	A	B	B	A	B	B
Excalibur_rep_c112367_293	TG39052A	IWB30584	2B	26.9		2A	45.51					2B	14.5243	A	B	A	A	A	B	A	A	B	A	A	B	A	A	B	A	A	B	B	A	B	B	B	A	B	B	B	B	B	B	A	B	B	A	B	B
BS00070900_51	TG25352B	IWB10512	2B	26.9		2B	75.27	2B	25.8					A	B	A	A	A	B	A	A	B	A	A	B	A	A	B	A	A	B	B	A	B	B	H	A	B	B	B	B	B	B	A	B	B	A	B	B
IAAV5802	TG12322B	IWB35090	2B	27.4		2B	77.23							A	B	A	A	A	B	A	A	A	A	A	B	A	A	B	A	A	B	B	A	B	B	B	A	B	B	B	B	B	B	A	B	B	A	B	B
RAC875_rep_c106596_127	TG29972B	IWB61616	2B	29.7		2B	78.55							A	B	A	A	A	B	A	A	B	B	A	B	A	A	B	A	A	B	B	A	B	B	B	A	B	B	B	B	B	B	A	B	B	A	B	B
RFL_Contig1863_250	TG30212B	IWB63747	2B	29.7		2A	45.51							A	B	A	A	A	B	A	A	B	B	A	B	A	A	B	A	A	B	B	A	B	B	B	A	B	B	B	B	B	B	A	B	B	A	B	B
wsnp_Ku_c2486_4751695	TG4620	IWA6767	2B	29.7		2B	78.55	2B	27.3					A	B	A	A	A	B	A	A	B	B	A	B	A	A	B	A	A	B	B	A	B	B	B	A	B	B	B	B	B	B	A	B	B	A	B	B
RFL_Contig5031_526	TG01312A	IWB64873	2B	38.1		2B	90.73	2B	31.2					A	B	A	A	A	B	A	A	A	A	A	B	A	A	B	A	A	B	B	A	B	B	H	A	B	B	B	B	B	A	A	B	B	A	B	B
Tdurum_contig54634_815	TG09262B	IWB72370	2B	38.1		2B	90.49	2B	31.2					A	B	A	A	A	B	A	A	A	A	A	B	A	A	B	A	A	B	B	A	B	B	H	A	B	B	B	B	B	A	A	B	B	A	B	B
Kukri_c53810_137	TG18232B	IWB46375	2B	39.8		2B	98.79							A	B	A	A	A	B	A	A	A	A	A	B	A	A	B	A	A	B	B	A	B	B	H	A	B	B	B	B	B	A	A	B	B	A	B	B
Ex_c14755_1362	TG34322D	IWB19867	2B	41.5		2B	101.33					2B	30.887	A	B	A	A	A	B	A	A	A	A	A	B	A	A	B	A	A	B	B	A	B	B	-	A	B	B	B	B	B	A	A	B	B	A	B	B
BobWhite_c2988_493	TG36202B	IWB2317	2B	41.5		2B	101.33					2B	30.5193	A	B	A	A	A	B	A	A	A	A	A	B	A	A	B	A	A	B	B	A	B	B	-	A	B	B	B	B	B	A	A	B	B	A	B	B
wsnp_Ra_c19083_28215239	TG33532B	IWA7697	2B	42		2B	103.5					2B	31.1628	A	B	A	A	A	B	A	A	A	A	A	B	A	A	B	A	A	B	B	A	B	B	H	A	B	B	B	B	B	A	A	B	B	A	B	B
Excalibur_c21220_88	TG15752B	IWB23606	2B	58.9		2B	128.43	2B	39.5					A	B	A	A	A	B	A	A	A	A	A	B	B	A	B	A	A	B	B	A	B	B	B	A	A	A	B	B	A	A	A	A	B	A	B	B
Ku_c41677_924	TG17452B	IWB39393	2B	58.9		2B	130.3	2B	39.5					A	B	A	A	A	B	A	A	A	A	A	B	B	A	B	A	A	B	B	A	B	B	B	A	A	A	B	B	A	A	A	A	B	A	B	B
wsnp_Ex_c163_321026	TG2225	IWA2117	2B	59.5		2B	122.28							A	B	A	A	A	B	A	A	B	A	A	B	B	A	B	A	A	B	B	A	B	B	B	A	A	A	B	B	A	A	A	A	B	A	B	B
IAAV3165	TG27362B	IWB34673	2B	62.3		2B	139.78							A	B	A	A	A	A	A	A	B	A	A	B	B	A	B	A	B	B	B	A	B	B	H	A	A	A	B	B	A	A	A	A	B	A	B	B
wsnp_Ex_c10596_17293363	TG31802B	IWA1360	2B	62.3		2B	139.78							A	B	A	A	A	A	A	A	B	A	A	B	B	A	B	A	B	B	B	A	B	B	H	A	A	A	B	B	A	A	A	A	B	A	B	B
BS00009807_51	TG36562B	IWB6117	2B	62.3		2B	139.52							A	B	A	A	A	A	A	A	B	A	A	B	B	A	B	A	B	B	B	A	B	B	H	A	A	A	B	B	A	A	A	A	B	A	B	B
Kukri_c37311_136	TG40662B	IWB44675	2B	62.3		2B	139.78							A	B	A	A	A	A	A	A	B	A	A	B	B	A	B	A	B	B	B	A	B	B	B	A	A	A	B	B	A	A	A	A	B	A	B	B
wsnp_Ex_c10596_17293192	TG44612B	IWA1359	2B	62.3		2B	139.52							A	B	A	A	A	A	A	A	B	A	A	B	B	A	B	A	B	B	B	A	B	B	H	A	A	A	B	B	A	A	A	A	B	A	B	B
BobWhite_c11059_169	TG00012D	IWB167	2B	62.9		2B	139.78	2B	41.9					A	B	A	A	A	A	A	A	B	A	A	B	B	A	B	A	B	B	B	A	B	B	H	A	A	A	B	B	A	A	A	A	B	A	B	B
BobWhite_c23790_98	TG0215	IWB1748	2B	62.9		2B	138.02	2B	41.9					A	B	A	A	A	A	A	A	B	A	A	B	B	A	B	A	B	B	B	A	B	B	H	A	A	A	B	B	A	A	A	A	B	A	B	B
Kukri_c11318_591	TG0609	IWB40572	2B	62.9		2B	139.78	2B	41.9					A	B	A	A	A	A	A	A	B	A	A	B	B	A	B	A	B	B	B	A	B	B	H	A	A	A	B	B	A	A	A	A	B	A	B	B
RAC875_c17720_501	TG07322B	IWB54530	2B	62.9		2B	134.12	2B	39.5			2B	48.261	A	B	A	A	A	A	A	A	B	A	A	B	B	A	B	A	B	B	B	A	B	B	H	A	A	A	B	B	A	A	A	A	B	A	B	B
RAC875_c17720_570	TG07332B	IWB54531	2B	62.9		2B	133.52	2B	39.5					A	B	A	A	A	A	A	A	B	A	A	B	B	A	B	A	B	B	B	A	B	B	H	A	A	A	B	B	A	A	A	A	B	A	B	B
RAC875_c17720_436	TG19152B	IWB54529	2B	62.9		2B	134.47	2B	39.5			2B	48.261	A	B	A	A	A	A	A	A	B	A	A	B	B	A	B	A	B	B	B	A	B	B	A	A	A	A	B	B	A	A	A	A	B	A	B	B
RAC875_c23425_208	TG19252B	IWB55506	2B	62.9		2B	132.83	2B	39.5			2B	48.261	A	B	A	A	A	A	A	A	B	A	A	B	B	A	B	A	B	B	B	A	B	B	A	A	A	A	B	B	A	A	A	A	B	A	B	B
Kukri_c59939_94	TG4094	IWB46832	2B	62.9		2B	139.52	2B	41.9					A	B	A	A	A	A	A	A	B	A	A	B	B	A	B	A	B	B	B	A	B	B	H	A	A	A	B	B	A	A	A	A	B	A	B	B
Excalibur_c20196_503	TG04292D	IWB23439	2B	63.4		2B	133.07	2B	39.5					A	B	A	A	A	A	A	A	A	A	A	B	B	A	B	A	B	B	B	A	B	B	H	A	A	A	B	B	A	A	A	A	B	A	B	B
wsnp_Ra_c407_862316	TG46522B	IWA7916	2B	64		2B	139.94	2B	42.7					A	B	A	A	A	A	A	A	A	A	A	B	B	A	B	A	B	B	B	A	B	B	H	A	A	A	B	B	A	A	B	A	B	A	B	B
wsnp_Ex_rep_c70571_69488416	TG10951A	IWA5697	2B	73.7		2B	150.83							A	B	A	A	A	A	A	A	B	A	A	B	B	A	B	A	B	A	A	A	B	B	-	A	A	A	A	B	A	A	B	A	B	A	B	B
BS00065105_51	TG14762B	IWB9450	2B	74.2		2B	156.21							A	B	A	A	A	A	A	A	B	A	A	B	B	A	B	A	B	A	A	A	B	B	H	A	A	A	A	B	A	A	B	A	B	A	B	B
wsnp_JD_c3732_4781170	TG35752B	IWA6026	2B	75.4		2B	153.95					2B	71.794	A	B	A	A	A	A	A	A	B	A	A	B	B	A	B	A	B	A	A	A	B	B	H	A	A	A	A	B	A	A	B	A	B	A	B	B
wsnp_Ku_c31_62657	TG46232B	IWA6893	2B	75.9		2B	154.98							A	B	A	A	A	A	A	A	B	A	A	B	B	A	B	A	B	A	A	A	B	B	H	A	A	A	A	B	A	A	B	A	B	A	B	B
RAC875_c26415_350	TG1929	IWB55924	2B	77.6		2B	164.37					2B	82.0897	A	B	A	A	A	A	A	A	A	A	A	B	B	A	B	A	B	A	A	A	B	B	H	A	A	A	A	B	A	A	B	A	B	A	B	B
IAAV2784	TG05422A	IWB34613	2B	81.5		2B	183.74	2B	64.3					A	B	A	A	A	A	A	A	A	A	A	B	B	A	B	A	B	B	A	A	B	B	B	A	A	A	A	B	A	A	B	A	B	A	B	B
BS00099097_51	TG15172B	IWB12056	2B	81.5		2B	183.74	2B	64.3					A	B	A	A	A	A	A	A	A	A	A	B	B	A	B	A	B	B	A	A	B	B	B	A	A	A	A	B	A	A	B	A	B	A	B	B
RAC875_rep_c106400_276	TG2995	IWB61587	2B	81.5		2B	169.68	2B	64.3					A	B	A	A	A	A	A	A	A	A	A	B	B	A	B	A	B	B	A	A	B	B	H	A	A	A	A	B	A	A	B	A	B	A	B	B
RFL_Contig189_894	TG30222B	IWB63759	2B	81.5										A	B	A	A	A	A	A	A	A	A	A	B	B	A	B	A	B	B	A	A	B	B	H	A	A	A	A	B	A	A	B	A	B	A	B	B
wsnp_Ku_c4507_8157580	TG3334	IWA7076	2B	81.5		2B	185.34	2B	64.3					A	B	A	A	A	A	A	A	A	A	A	B	B	A	B	A	B	B	A	A	B	B	B	A	A	A	A	B	A	A	B	A	B	A	B	B
RAC875_c31252_173	TG35012A	IWB56587	2B	81.5		2B	183.74							A	B	A	A	A	A	A	A	A	A	A	B	B	A	B	A	B	B	A	A	B	B	B	A	A	A	A	B	A	A	B	A	B	A	B	B
Kukri_c40953_658	TG40762A	IWB45082	2B	81.5		2B	183.74	2B	64.3					A	B	A	A	A	A	A	A	A	A	A	B	B	A	B	A	B	B	A	A	B	B	B	A	A	A	A	B	A	A	B	A	B	A	B	B
Kukri_c67546_279	TG41002A	IWB47398	2B	81.5		2B	183.74	2B	64.3					A	B	A	A	A	A	A	A	A	A	A	B	B	A	B	A	B	B	A	A	B	B	B	A	A	A	A	B	A	A	B	A	B	A	B	B
RAC875_c2110_117	TG41782B	IWB55126	2B	81.5		2B	192.83							A	B	A	A	A	A	A	A	A	A	A	B	B	A	B	A	B	B	A	A	B	B	B	A	A	A	A	B	A	A	B	A	B	A	B	B
IAAV3789	TG12282A	IWB34771	2B	81.5		2B	183.74	2B	64.3			2B	90.4549	A	B	A	A	A	A	A	A	A	A	A	B	B	A	B	A	B	B	A	A	B	B	B	A	A	A	A	B	A	A	B	A	B	A	B	B
Kukri_c67546_342	TG06582A	IWB47399	2B	81.5		2B	183.74	2B	64.3			2B	93.1208	A	B	A	A	A	A	A	A	A	A	A	B	B	A	B	A	B	B	A	A	B	B	B	A	A	A	A	B	A	A	B	A	B	A	B	B
GENE-4359_102	TG05322B	IWB33921	2B	81.5		2B	184.96	2B	64.3					A	B	A	A	A	A	A	A	A	A	A	B	B	A	B	A	B	B	A	A	B	B	B	A	A	A	A	B	A	A	B	A	B	A	B	B
wsnp_CAP8_c630_456418	TG21972B	IWA1204	2B	81.5		2B	184.97	2B	64.3					A	B	A	A	A	A	A	A	A	A	A	B	B	A	B	A	B	B	A	A	B	B	B	A	A	A	A	B	A	A	B	A	B	A	B	B
wsnp_BF202681B_Ta_2_2	TG01542B	IWA429	2B	81.5		2B	186.71	2B	64.3					A	B	A	A	A	A	A	A	A	A	A	B	B	A	B	A	B	B	A	A	B	B	B	A	A	A	A	B	A	A	B	A	B	A	B	B
Kukri_c9387_372	TG06682B	IWB48352	2B	81.5		2B	186.71	2B	64.3					A	B	A	A	A	A	A	A	A	A	A	B	B	A	B	A	B	B	A	A	B	B	B	A	A	A	A	B	A	A	B	A	B	A	B	B
RAC875_rep_c112008_519	TG30002B	IWB62112	2B	81.5		2B	183.19	2B	64.3			2B	93.1208	A	B	A	A	A	A	A	A	A	A	A	B	B	A	B	A	B	B	A	A	B	B	H	A	A	A	A	B	A	A	B	A	B	A	B	B
Ra_c2110_1660	TG07002B	IWB51418	2B	81.5		2B	186.71	2B	64.3					A	B	A	A	A	A	A	A	A	A	A	B	B	A	B	A	B	B	A	A	B	B	B	A	A	A	A	B	A	A	B	A	B	A	B	B
Kukri_c9387_112	TG34822B	IWB48351	2B	81.5		2B	186.71	2B	64.3					A	B	A	A	A	A	A	A	A	A	A	B	B	A	B	A	B	B	A	A	B	B	B	A	A	A	A	B	A	A	B	A	B	A	B	B
BS00022417_51	TG02742B	IWB7069	2B	81.5		2B	183.74	2B	64.3					A	B	A	A	A	A	A	A	A	A	A	B	B	A	B	A	B	B	A	A	B	B	B	A	A	A	A	B	A	A	B	A	B	A	B	B
Excalibur_c15031_73	TG15632B	IWB22543	2B	81.5		2B	169.68	2B	64.3					A	B	A	A	A	A	A	A	A	A	A	B	B	A	B	A	B	B	A	A	B	B	-	A	A	A	A	B	A	A	B	A	B	A	B	B
RAC875_c15649_1101	TG1907	IWB54123	2B	81.5		2B	183.74	2B	64.3			2B	93.4885	A	B	A	A	A	A	A	A	A	A	A	B	B	A	B	A	B	B	A	A	B	B	B	A	A	A	A	B	A	A	B	A	B	A	B	B
RFL_Contig1385_326	TG30192B	IWB63625	2B	81.5		2B	183.74	2B	64.3					A	B	A	A	A	A	A	A	A	A	A	B	B	A	B	A	B	B	A	A	B	B	B	A	A	A	A	B	A	A	B	A	B	A	B	B
BS00059315_51	TG34032B	IWB8772	2B	81.5		2B	169.68	2B	64.3					A	B	A	A	A	A	A	A	A	A	A	B	B	A	B	A	B	B	A	A	B	B	H	A	A	A	A	B	A	A	B	A	B	A	B	B
BS00022949_51	TG36842B	IWB7335	2B	81.5		2B	183.74	2B	64.3			2B	93.1208	A	B	A	A	A	A	A	A	A	A	A	B	B	A	B	A	B	B	A	A	B	B	B	A	A	A	A	B	A	A	B	A	B	A	B	B
Ra_c2110_494	TG41402B	IWB51419	2B	81.5		2B	186.71	2B	64.3					A	B	A	A	A	A	A	A	A	A	A	B	B	A	B	A	B	B	A	A	B	B	B	A	A	A	A	B	A	A	B	A	B	A	B	B
RAC875_c14105_66	TG4162	IWB53866	2B	81.5		2B	192.83							A	B	A	A	A	A	A	A	A	A	A	B	B	A	B	A	B	B	A	A	B	B	B	A	A	A	A	B	A	A	B	A	B	A	B	B
RAC875_rep_c72435_90	TG08382D	IWB62870	2B	82.6		2B	169.68	2B	64.3			2B	93.1208	A	B	A	A	A	A	A	A	B	A	A	B	B	A	B	A	B	B	A	A	B	B	H	A	A	A	A	B	A	A	B	A	B	A	B	B
Tdurum_contig98206_211	TG09612D	IWB74034	2B	82.6		2B	183.19	2B	64.3	2B	4.87229			A	B	A	A	A	A	A	A	B	A	A	B	B	A	B	A	B	B	A	A	B	B	H	A	A	A	A	B	A	A	B	A	B	A	B	B
Jagger_c4412_265	TG12422B	IWB36600	2B	82.6		2B	169.68	2B	64.3			2B	93.1208	A	B	A	A	A	A	A	A	B	A	A	B	B	A	B	A	B	B	A	A	B	B	-	A	A	A	A	B	A	A	B	A	B	A	B	B
Kukri_c16760_1427	TG28171A	IWB41646	2B	82.6		2B	183.19	2B	64.3					A	B	A	A	A	A	A	A	B	A	A	B	B	A	B	A	B	B	A	A	B	B	A	A	A	A	A	B	A	A	B	A	B	A	B	B
GENE-0644_421	TG34502A	IWB32007	2B	82.6		2B	169.68	2B	64.3			2B	93.1208	A	B	A	A	A	A	A	A	B	A	A	B	B	A	B	A	B	B	A	A	B	B	H	A	A	A	A	B	A	A	B	A	B	A	B	B
RAC875_rep_c113555_122	TG42772B	IWB62221	2B	82.6		2B	169.68	2B	64.3			2B	93.1208	A	B	A	A	A	A	A	A	B	A	A	B	B	A	B	A	B	B	A	A	B	B	-	A	A	A	A	B	A	A	B	A	B	A	B	B
Excalibur_c13239_85	TG38292A	IWB22236	2B	82.6		2B	169.68	2B	64.3					A	B	A	A	A	A	A	A	B	A	A	B	B	A	B	A	B	B	A	A	B	B	H	A	A	A	A	B	A	A	B	A	B	A	B	B
GENE-0644_42	TG05152B	IWB32006	2B	82.6		2B	169.68	2B	64.3			2B	92.845	A	B	A	A	A	A	A	A	B	A	A	B	B	A	B	A	B	B	A	A	B	B	H	A	A	A	A	B	A	A	B	A	B	A	B	B
GENE-0644_370	TG16522A	IWB32005	2B	82.6		2B	169.68	2B	64.3			2B	93.1208	A	B	A	A	A	A	A	A	B	A	A	B	B	A	B	A	B	B	A	A	B	B	H	A	A	A	A	B	A	A	B	A	B	A	B	B
BobWhite_c662_148	TG02382B	IWB4196	2B	82.6		2B	192.28	2B	64.3	2B	8.82222			A	B	A	A	A	A	A	A	B	A	A	B	B	A	B	A	B	B	A	A	B	B	B	A	A	A	A	B	A	A	B	A	B	A	B	B
Ku_c28266_279	TG17402B	IWB39049	2B	83.2										A	B	A	A	A	A	A	A	B	A	A	B	B	A	B	A	B	B	A	A	B	B	B	A	A	A	A	B	A	A	B	A	B	A	B	B
RAC875_c79857_301	TG19772B	IWB60585	2B	83.2		2B	190.96							A	B	A	A	A	A	A	A	B	A	A	B	B	A	B	A	B	B	A	A	B	B	H	A	A	A	A	B	A	A	B	A	B	A	B	B
IAAV1903	TG16792B	IWB34469	2B	83.8		2B	207.59	2B	64.3	2B	16.6833			A	B	A	A	A	A	A	A	B	A	A	B	B	A	B	A	B	B	A	A	B	B	H	A	A	A	A	B	A	A	B	A	B	A	B	B
TG0016	TG2140		2B	83.8										A	B	A	A	A	A	A	A	B	A	A	B	B	A	B	A	B	B	A	A	B	B	B	A	A	A	A	B	A	A	B	A	B	A	B	B
wsnp_Ex_c14595_22634031	TG22192B	IWA1914	2B	83.8		2B	202.02							A	B	A	A	A	A	A	A	B	A	A	B	B	A	B	A	B	B	A	A	B	B	B	A	A	A	A	B	A	A	B	A	B	A	B	B
IAAV2018	TG27312B	IWB34490	2B	83.8		2B	205.32							A	B	A	A	A	A	A	A	B	A	A	B	B	A	B	A	B	B	A	A	B	B	B	A	A	A	A	B	A	A	B	A	B	A	B	B
wsnp_Ex_c22018_31193171	TG32132B	IWA2674	2B	83.8		2B	203.97	2B	64.3					A	B	A	A	A	A	A	A	B	A	A	B	B	A	B	A	B	B	A	A	B	B	B	A	A	A	A	B	A	A	B	A	B	A	B	B
Excalibur_c9248_771	TG34482B	IWB29391	2B	83.8		2B	202.02							A	B	A	A	A	A	A	A	B	A	A	B	B	A	B	A	B	B	A	A	B	B	B	A	A	A	A	B	A	A	B	A	B	A	B	B
Kukri_c53629_239	TG3479	IWB46352	2B	83.8		2B	209.61	2B	64.3					A	B	A	A	A	A	A	A	B	A	A	B	B	A	B	A	B	B	A	A	B	B	B	A	A	A	A	B	A	A	B	A	B	A	B	B
wsnp_Ex_c62844_62315607	TG45532B	IWA4472	2B	83.8		2B	205.32	2B	64.3					A	B	A	A	A	A	A	A	B	A	A	B	B	A	B	A	B	B	A	A	B	B	B	A	A	A	A	B	A	A	B	A	B	A	B	B
Excalibur_c83705_247	TG4734	IWB29077	2B	83.8										A	B	A	A	A	A	A	A	B	A	A	B	B	A	B	A	B	B	A	A	B	B	B	A	A	A	A	B	A	A	B	A	B	A	B	B
Excalibur_rep_c106124_239	TG04952B	IWB30179	2B	84.3		2B	203.04	2B	64.3	2B	12.757	2B	97.1655	A	B	A	A	A	A	A	A	A	A	A	B	B	A	B	A	B	B	A	A	B	B	B	A	A	A	A	B	A	A	B	A	B	A	B	B
IACX1412	TG0569	IWB35747	2B	84.3		2B	203.04	2B	64.3	2B	12.757	2B	97.1655	A	B	A	A	A	A	A	A	A	A	A	B	B	A	B	A	B	B	A	A	B	B	B	A	A	A	A	B	A	A	B	A	B	A	B	B
wsnp_Ex_c45094_50985067	TG10512B	IWA3924	2B	84.3		2B	202.02	2B	64.3	2B	12.757	2B	96.7978	A	B	A	A	A	A	A	A	A	A	A	B	B	A	B	A	B	B	A	A	B	B	B	A	A	A	A	B	A	A	B	A	B	A	B	B
wsnp_Ex_c9248_15372536	TG23042B	IWA4894	2B	84.3		2B	202.02	2B	64.3	2B	12.757	2B	96.522	A	B	A	A	A	A	A	A	A	A	A	B	B	A	B	A	B	B	A	A	B	B	B	A	A	A	A	B	A	A	B	A	B	A	B	B
wsnp_Ex_c3044_5620102	TG32292B	IWA3277	2B	84.3		2B	206.37	2B	64.3			2B	99.1878	A	B	A	A	A	A	A	A	A	A	A	B	B	A	B	A	B	B	A	A	B	B	B	A	A	A	A	B	A	A	B	A	B	A	B	B
BS00092273_51	TG3421	IWB11750	2B	84.3		2B	202.02	2B	64.3	2B	12.757	2B	97.1655	A	B	A	A	A	A	A	A	A	A	A	B	B	A	B	A	B	B	A	A	B	B	B	A	A	A	A	B	A	A	B	A	B	A	B	B
GENE-1389_396	TG34512D	IWB32439	2B	84.3		2B	203.04	2B	64.3					A	B	A	A	A	A	A	A	A	A	A	B	B	A	B	A	B	B	A	A	B	B	B	A	A	A	A	B	A	A	B	A	B	A	B	B
wsnp_BE399688B_Ta_2_1	TG35472B	IWA10	2B	84.3		2B	202.02	2B	64.3	2B	12.757			A	B	A	A	A	A	A	A	A	A	A	B	B	A	B	A	B	B	A	A	B	B	B	A	A	A	A	B	A	A	B	A	B	A	B	B
GENE-1389_59	TG39272B	IWB32441	2B	84.3		2B	203.04	2B	64.3			2B	97.1655	A	B	A	A	A	A	A	A	A	A	A	B	B	A	B	A	B	B	A	A	B	B	B	A	A	A	A	B	A	A	B	A	B	A	B	B
Ku_c34010_1016	TG0596	IWB39220	2B	85.5		2B	193.92	2B	64.3	2B	10.1338	2B	94.4996	A	B	A	A	A	A	A	A	B	A	A	B	B	A	B	A	B	B	A	A	B	B	B	A	A	A	A	B	A	A	B	A	B	A	B	B
wsnp_Ex_c51461_55394646	TG10582B	IWA4102	2B	86.1		2B	207.59	2B	64.3			2B	100.843	A	B	A	A	A	A	A	A	B	A	A	B	B	A	B	A	B	B	A	A	B	B	H	A	A	A	A	B	A	A	B	A	B	A	B	B
TA001322-1176	TG0865	IWB65378	2B	86.6		2B	207.59	2B	64.3			2B	100.843	A	B	A	A	A	A	A	A	B	A	A	B	B	A	B	A	B	B	A	A	B	B	H	A	A	A	A	B	A	A	B	A	B	A	B	B
BobWhite_c948_52	TG13922B	IWB4614	2B	86.6		2B	207.59	2B	64.3			2B	100.843	A	B	A	A	A	A	A	A	B	A	A	B	B	A	B	A	B	B	A	A	B	B	H	A	A	A	A	B	A	A	B	A	B	A	B	B
Jagger_c9472_305	TG1722	IWB36818	2B	86.6		2B	222.87	2B	66					A	B	A	A	A	A	A	A	B	A	A	B	B	A	B	A	B	B	A	A	B	B	H	A	A	A	A	B	A	A	B	A	B	A	B	B
IAAV5331	TG27442B	IWB35009	2B	86.6		2B	207.59					2B	100.843	A	B	A	A	A	A	A	A	B	A	A	B	B	A	B	A	B	B	A	A	B	B	H	A	A	A	A	B	A	A	B	A	B	A	B	B
Kukri_rep_c94009_116	TG28872B	IWB50518	2B	86.6		2B	207.59	2B	64.3			2B	100.843	A	B	A	A	A	A	A	A	B	A	A	B	B	A	B	A	B	B	A	A	B	B	H	A	A	A	A	B	A	A	B	A	B	A	B	B
wsnp_Ku_c27759_37702654	TG33282B	IWA6830	2B	86.6		2B	208.76	2B	66.8			2B	101.118	A	B	A	A	A	A	A	A	B	A	A	B	B	A	B	A	B	B	A	A	B	B	H	A	A	A	A	B	A	A	B	A	B	A	B	B
BS00043103_51	TG37042B	IWB8334	2B	86.6		2B	207.59	2B	64.3			2B	100.843	A	B	A	A	A	A	A	A	B	A	A	B	B	A	B	A	B	B	A	A	B	B	H	A	A	A	A	B	A	A	B	A	B	A	B	B
wsnp_Ex_rep_c101906_87187119	TG48512B	IWA5038	2B	86.6		2B	207.59	2B	64.3			2B	100.843	A	B	A	A	A	A	A	A	B	A	A	B	B	A	B	A	B	B	A	A	B	B	H	A	A	A	A	B	A	A	B	A	B	A	B	B
wsnp_JD_c6350_7516597	TG2334	IWA6135	2B	87.2		2B	207.59							A	B	A	A	A	A	A	A	A	A	A	B	B	A	B	A	B	B	A	A	B	B	A	A	A	A	A	B	A	A	B	A	B	A	B	B
BS00011039_51	TG2456	IWB6330	2B	87.2		2B	205.32	2B	64.3					A	B	A	A	A	A	A	A	A	A	A	B	B	A	B	A	B	B	A	A	B	B	H	A	A	A	A	B	A	A	B	A	B	A	B	B
BS00041323_51	TG11772B	IWB8270	2B	87.2		2B	205.32							A	B	A	A	A	A	A	A	A	A	A	B	B	A	B	A	B	B	A	A	B	B	B	A	A	A	A	B	A	A	B	A	B	A	B	B
BS00037278_51	TG24942B	IWB8099	2B	87.8		2B	207.59	2B	66.8					A	B	A	A	A	A	A	A	A	A	A	B	B	A	B	A	B	B	A	A	B	B	H	A	A	A	A	B	A	A	B	A	B	A	B	B
BobWhite_c7786_376	TG36412D	IWB4384	2B	87.8		2B	206.37	2B	64.3	2B	16.6833			A	B	A	A	A	A	A	A	A	A	A	B	B	A	B	A	B	B	A	A	B	B	H	A	A	A	A	B	A	A	B	A	B	A	B	B
Ku_c7740_879	TG17502B	IWB40021	2B	88.3		2B	203.97			2B	13.4107			A	B	A	A	A	A	A	A	A	A	A	B	B	A	B	A	B	B	A	A	B	B	A	A	A	A	A	B	A	A	B	A	B	A	B	B
Excalibur_c46143_143	TG38662B	IWB26735	2B	88.9		2B	206.37	2B	64.3					A	B	A	A	A	A	A	A	A	A	A	B	B	A	B	A	B	B	A	A	B	B	H	A	A	A	A	B	A	A	B	A	B	A	B	B
RAC875_c19210_348	TG1273	IWB54789	2B	88.9		2B	209.61							A	B	A	A	A	A	A	A	A	A	A	B	B	A	B	A	B	B	A	A	B	B	-	A	A	A	A	B	A	A	B	A	B	A	B	B
wsnp_JD_c1236_1789566	TG10962B	IWA5811	2B	88.9		2B	206.37	2B	64.3					A	B	A	A	A	A	A	A	A	A	A	B	B	A	B	A	B	B	A	A	B	B	H	A	A	A	A	B	A	A	B	A	B	A	B	B
wsnp_JD_c4699_5834958	TG11022B	IWA6075	2B	88.9		2B	209.61	2B	64.3					A	B	A	A	A	A	A	A	A	A	A	B	B	A	B	A	B	B	A	A	B	B	H	A	A	A	A	B	A	A	B	A	B	A	B	B
wsnp_JD_rep_c64505_41132927	TG11052B	IWA6308	2B	88.9		2B	207.59							A	B	A	A	A	A	A	A	A	A	A	B	B	A	B	A	B	B	A	A	B	B	B	A	A	A	A	B	A	A	B	A	B	A	B	B
wsnp_Ku_c15336_23908130	TG11092B	IWA6554	2B	88.9		2B	207.59							A	B	A	A	A	A	A	A	A	A	A	B	B	A	B	A	B	B	A	A	B	B	H	A	A	A	A	B	A	A	B	A	B	A	B	B
RAC875_c50245_120	TG29612A	IWB58624	2B	88.9		2B	202.02	2B	64.3					A	B	A	A	A	A	A	A	A	A	A	B	B	A	B	A	B	B	A	A	B	B	H	A	A	A	A	B	A	A	B	A	B	A	B	B
Kukri_rep_c69267_496	TG41282B	IWB49874	2B	89.5		2B	222.87	2B	66					A	B	A	A	A	A	A	A	A	A	A	B	B	A	B	A	B	B	A	A	B	B	H	A	A	A	A	B	A	A	B	A	B	A	B	B
BobWhite_c14686_86	TG33692B	IWB685	2B	90		2B	248.55	2B	69.9			2B	114.172	A	B	A	A	A	A	A	A	A	A	A	B	B	A	B	A	B	B	A	A	B	B	H	A	A	A	A	B	A	A	B	A	B	A	B	B
RAC875_c5080_915	TG07892B	IWB58691	2B	90.6		2B	223.68	2B	66					A	B	A	A	A	A	A	A	B	A	A	B	B	A	B	A	B	B	A	A	B	B	H	A	A	A	A	B	A	A	B	A	B	A	B	B
Excalibur_rep_c109282_92	TG39042A	IWB30396	2B	90.6		2B	209.61			2B	18.0259			A	B	A	A	A	A	A	A	B	H	A	B	B	A	B	A	B	B	A	A	B	B	B	A	A	A	A	B	A	A	B	A	B	A	B	B
Ku_c6546_718	TG40152B	IWB39776	2B	90.6		2B	223.68	2B	66					A	B	A	A	A	A	A	A	B	A	A	B	B	A	B	A	B	B	A	A	B	B	H	A	A	A	A	B	A	A	B	A	B	A	B	B
BobWhite_c16735_131	TG02072B	IWB951	2B	91.1		2B	248.55	2B	69.9					A	B	A	A	A	A	A	A	B	A	A	B	B	A	B	A	B	B	A	A	B	B	B	A	A	A	A	B	A	A	B	A	B	A	B	B
wsnp_JD_c9251_10121369	TG23362B	IWA6216	2B	91.1		2B	238.89	2B	69.9					A	B	A	A	A	A	A	A	B	A	A	B	B	A	B	A	B	B	A	A	B	B	B	A	A	A	A	B	A	A	B	A	B	A	B	B
Kukri_c10017_833	TG06064A	IWB40211	2B	91.7		2B	253.77	2B	69.9			2B	112.149	A	B	A	A	A	A	A	A	A	A	A	B	B	A	B	A	B	B	A	A	B	B	H	A	A	A	A	B	A	A	B	A	B	A	B	B
wsnp_Ex_c8894_14858193	TG10752B	IWA4853	2B	94		2B	266.71	2B	72.2					A	B	A	A	A	A	A	A	B	A	A	B	B	A	B	A	B	B	A	A	B	B	H	A	A	A	A	B	A	A	B	A	B	A	B	B
Kukri_c35153_145	TG28392B	IWB44417	2B	94		2B	266.71	2B	72.2					A	B	A	A	A	A	A	A	B	A	A	B	B	A	B	A	B	B	A	A	B	B	A	A	A	A	A	B	A	A	B	A	B	A	B	B
Kukri_c35153_956	TG06312A	IWB44418	2B	94.5		2B	262.01	2B	72.2					A	B	A	A	A	A	A	A	A	A	A	B	B	A	B	A	B	B	A	A	B	B	A	A	A	A	A	B	A	A	B	A	B	A	B	B
RAC875_rep_c70357_917	TG0834	IWB62680	2B	94.5		2B	262.01	2B	72.2					A	B	A	A	A	A	A	A	A	A	A	B	B	A	B	A	B	B	A	A	B	B	H	A	A	A	A	B	A	A	B	A	B	A	B	B
wsnp_JD_c758_1132463	TG13452A	IWA6175	2B	94.5		2B	263.63							A	B	A	A	A	A	A	A	A	A	A	B	B	A	B	A	B	B	A	A	B	B	H	A	A	A	A	B	A	A	B	A	B	A	B	B
Excalibur_c29734_1152	TG1209	IWB24879	2B	95.1		2B	262.01	2B	72.2					A	B	A	A	A	A	A	A	A	A	A	B	B	A	B	A	B	B	A	A	B	B	H	A	A	A	A	B	A	A	B	A	B	A	B	B
wsnp_Ex_rep_c105129_89641882	TG3281	IWA5128	2B	95.1		2B	260.94	2B	71.4			2B	132.649	A	B	A	A	A	A	A	A	A	A	A	B	B	A	B	A	B	B	A	A	B	B	H	A	A	A	A	B	A	A	B	A	B	A	B	B
Jagger_c1810_163	TG27822B	IWB36462	2B	95.7		2B	262.01	2B	71.4			2B	133.66	A	B	A	A	A	A	A	A	A	A	A	B	B	A	B	A	B	B	A	A	B	B	H	A	A	A	A	B	A	A	B	A	B	A	B	B
Tdurum_contig12836_418	TG01392B	IWB67747	2B	96.2		2B	262.21	2B	71.4	2B	33.3727	2B	133.292	A	B	A	A	A	A	A	A	B	A	A	B	B	A	B	A	B	B	A	A	B	B	H	A	A	A	A	B	A	A	B	A	B	A	B	B
Ra_c9190_1384	TG0716	IWB52801	2B	96.2		2B	262.21	2B	71.4			2B	133.66	A	B	A	A	A	A	A	A	B	A	A	B	B	A	B	A	B	B	A	A	B	B	H	A	A	A	A	B	A	A	B	A	B	A	B	B
Tdurum_contig64416_441	TG0937	IWB72986	2B	96.2		2B	262.01			2B	33.3727			A	B	A	A	A	A	A	A	B	A	A	B	B	A	B	A	B	B	A	A	B	B	H	A	A	A	A	B	A	A	B	A	B	A	B	B
Ku_c6050_678	TG4013	IWB39706	2B	96.2		2B	262.21	2B	71.4			2B	133.292	A	B	A	A	A	A	A	A	B	A	A	B	B	A	B	A	B	B	A	A	B	B	H	A	A	A	A	B	A	A	B	A	B	A	B	B
Tdurum_contig27880_199	TG48112B	IWB69362	2B	96.2		2B	262.01			2B	33.3727			A	B	A	A	A	A	A	A	B	A	A	B	B	A	B	A	B	B	A	A	B	B	-	A	A	A	A	B	A	A	B	A	B	A	B	B
wsnp_Ex_c114_230248	TG13232B	IWA1489	2B	97.9		2B	275.43	2B	78.8					A	B	A	A	A	A	A	A	B	A	A	B	B	A	B	A	B	B	A	A	B	B	H	A	A	A	A	B	A	A	B	A	B	A	B	B
BS00091099_51	TG15112B	IWB11692	2B	97.9		2B	275.19							A	B	A	A	A	A	A	A	B	A	A	B	B	A	B	A	B	B	A	A	B	B	B	A	A	A	A	B	A	A	B	A	B	A	B	B
wsnp_JD_rep_c67103_42432235	TG48562B	IWA6317	2B	97.9		2B	275.43	2B	78.8					A	B	A	A	A	A	A	A	B	A	A	B	B	A	B	A	B	B	A	A	B	B	H	A	A	A	A	B	A	A	B	A	B	A	B	B
GENE-4029_80	TG05302A	IWB33744	2B	98.5		2B	271.72							A	B	A	A	A	A	A	A	B	A	A	B	B	A	B	A	B	B	A	A	B	B	B	A	A	A	A	B	A	A	B	A	B	A	B	B
BS00100563_51	TG25652B	IWB12137	2B	98.5		2B	271.72							A	B	A	A	A	A	A	A	B	A	A	B	B	A	B	A	B	B	A	A	B	B	B	A	A	A	A	B	A	A	B	A	B	A	B	B
RAC875_c15396_90	TG29122A	IWB54088	2B	98.5		2B	262.01							A	B	A	A	A	A	A	A	B	A	A	B	B	A	B	A	B	B	A	A	B	B	B	A	A	A	A	B	A	A	B	A	B	A	B	B
Tdurum_contig13653_255	TG4348	IWB68043	2B	99		2B	271.7							A	B	A	A	A	A	A	A	B	A	A	B	B	A	B	A	B	B	A	A	B	B	B	A	A	A	A	B	A	A	B	A	B	A	B	B
wsnp_BE490763B_Ta_2_1	TG09762B	IWA242	2B	99.6		2B	270.66	2B	72.2					A	B	A	A	A	A	A	A	B	A	A	B	B	A	B	A	B	B	A	A	B	B	B	A	A	A	A	B	A	A	B	A	B	A	B	B
BobWhite_c16130_362	TG35972B	IWB874	2B	99.6		2B	270.41	2B	72.2			2B	139.635	A	B	A	A	A	A	A	A	B	A	A	B	B	A	B	A	B	B	A	A	B	B	B	A	A	A	A	B	A	A	B	A	B	A	B	B
wsnp_Ex_c20169_29215401	TG13282B	IWA2512	2B	100.2		2B	270.15	2B	72.2					A	B	A	A	A	A	A	A	B	A	A	B	B	A	B	A	B	B	A	A	B	B	B	A	A	A	A	B	A	A	B	A	B	A	B	B
RFL_Contig4718_1269	TG30372B	IWB64778	2B	100.2		2B	270.15	2B	72.2					A	B	A	A	A	A	A	A	B	A	A	B	B	A	B	A	B	B	A	A	B	B	B	A	A	A	A	B	A	A	B	A	B	A	B	B
BobWhite_c26981_66	TG36162B	IWB2052	2B	100.7		2B	270.66	2B	72.2			2B	140.003	A	B	A	A	A	A	A	A	B	A	A	B	B	A	B	A	B	B	A	A	B	B	B	A	A	A	A	B	A	A	B	A	B	A	B	B
wsnp_Ex_c55735_58127324	TG01732B	IWA4275	2B	101.3		2B	281.45							A	B	A	A	A	A	A	A	A	A	A	B	B	A	B	A	B	B	A	A	B	B	B	A	A	A	A	B	A	A	B	A	B	A	B	B
Ex_c55735_1012	TG1551	IWB20922	2B	101.3		2B	280.85							A	B	A	A	A	A	A	A	A	A	A	B	B	A	B	A	B	B	A	A	B	B	B	A	A	A	A	B	A	A	B	A	B	A	B	B
Kukri_c4097_898	TG06372B	IWB45087	2B	101.8		2B	270.41	2B	72.2			2B	140.646	A	B	A	A	A	A	A	A	B	A	A	B	B	A	B	A	B	B	A	A	B	B	B	A	A	A	A	B	A	A	B	A	B	A	B	B
Tdurum_contig26542_457	TG3083	IWB69271	2B	101.8		2B	265.93	2B	72.2	2B	42.0196			A	B	A	A	A	A	A	A	B	A	A	B	B	A	B	A	B	B	A	A	B	B	B	A	A	A	A	B	A	A	B	A	B	A	B	B
wsnp_Ex_rep_c67543_66165372	TG3572	IWA5411	2B	101.8		2B	275.94			2B	42.0196			A	B	A	A	A	A	A	A	B	A	A	B	B	A	B	A	B	B	A	A	B	B	B	A	A	A	A	B	A	A	B	A	B	A	B	B
RFL_Contig2290_184	TG43002B	IWB63897	2B	101.8		2B	270.41	2B	72.2			2B	140.003	A	B	A	A	A	A	A	A	B	A	A	B	B	A	B	A	B	B	A	A	B	B	B	A	A	A	A	B	A	A	B	A	B	A	B	B
TA006140-0798	TG4331	IWB66062	2B	101.8		2B	270.41	2B	72.2			2B	139.635	A	B	A	A	A	A	A	A	B	A	A	B	B	A	B	A	B	B	A	A	B	B	B	A	A	A	A	B	A	A	B	A	B	A	B	B
wsnp_BE490763B_Ta_2_2	TG44422B	IWA243	2B	101.8		2B	270.66	2B	72.2					A	B	A	A	A	A	A	A	B	A	A	B	B	A	B	A	B	B	A	A	B	B	B	A	A	A	A	B	A	A	B	A	B	A	B	B
BS00093992_51	TG03742B	IWB11848	2B	102.4										A	B	A	A	A	A	A	A	B	A	A	B	B	A	B	A	B	B	A	A	B	B	B	A	A	A	A	B	A	A	B	A	B	A	B	B
Kukri_c19751_873	TG06212B	IWB42187	2B	102.4		2B	284.1	2B	78.8					A	B	A	A	A	A	A	A	B	A	A	B	B	A	B	A	B	B	A	A	B	B	B	A	A	A	A	B	A	A	B	A	B	A	B	B
BS00022800_51	TG1173	IWB7263	2B	102.4		2B	284.1							A	B	A	A	A	A	A	A	B	A	A	B	B	A	B	A	B	B	A	A	B	B	B	A	A	A	A	B	A	A	B	A	B	A	B	B
wsnp_Ex_c10838_17631243	TG1322	IWA1393	2B	102.4		2B	275.19			2B	42.6775			A	B	A	A	A	A	A	A	B	A	A	B	B	A	B	A	B	B	A	A	B	B	H	A	A	A	A	B	A	A	B	A	B	A	B	B
RAC875_c14775_1048	TG19042B	IWB53996	2B	102.4		2B	275.19	2B	78.8					A	B	A	A	A	A	A	A	B	A	A	B	B	A	B	A	B	B	A	A	B	B	H	A	A	A	A	B	A	A	B	A	B	A	B	B
IACX5850	TG27742B	IWB36041	2B	102.4		2B	275.19	2B	78.8					A	B	A	A	A	A	A	A	B	A	A	B	B	A	B	A	B	B	A	A	B	B	H	A	A	A	A	B	A	A	B	A	B	A	B	B
IAAV5226	TG3461	IWB34989	2B	102.4		2B	275.19			2B	62.5754			A	B	A	A	A	A	A	A	B	A	A	B	B	A	B	A	B	B	A	A	B	B	H	A	A	A	A	B	A	A	B	A	B	A	B	B
BS00093993_51	TG37692B	IWB11849	2B	102.4		2B	284.1							A	B	A	A	A	A	A	A	B	A	A	B	B	A	B	A	B	B	A	A	B	B	B	A	A	A	A	B	A	A	B	A	B	A	B	B
Tdurum_contig30930_184	TG4368	IWB70131	2B	102.4		2B	275.94	2B	78.8					A	B	A	A	A	A	A	A	B	A	A	B	B	A	B	A	B	B	A	A	B	B	B	A	A	A	A	B	A	A	B	A	B	A	B	B
Kukri_c97631_275	TG18502B	IWB48474	2B	103.5		2B	300.84	2B	74.9					A	B	A	A	A	A	A	A	B	A	A	B	B	A	B	A	B	B	A	A	B	B	H	A	A	A	A	B	A	A	B	A	B	A	B	B
Kukri_c4294_371	TG28512B	IWB45296	2B	103.5		2B	300.84	2B	74.9					A	B	A	A	A	A	A	A	B	A	A	B	B	A	B	A	B	B	A	A	B	B	H	A	A	A	A	B	A	A	B	A	B	A	B	B
wsnp_Ex_c17845_26604587	TG3200	IWA2261	2B	104.1		2B	286.74	2B	80.4	2B	59.9479			A	B	A	A	A	A	A	A	B	A	A	B	B	A	B	A	B	B	A	A	B	B	H	A	A	A	A	B	A	A	B	A	B	A	B	B
BobWhite_c18540_97	TG02102B	IWB1190	2B	105.2		2B	339.86	2B	85.1					A	B	A	A	A	A	A	A	B	A	A	B	B	A	B	A	B	B	A	A	B	B	B	A	A	A	A	B	A	A	B	A	B	A	B	B
Tdurum_contig55699_246	TG09292B	IWB72468	2B	105.2						2B	62.5754			A	B	A	A	A	A	A	A	B	A	A	B	B	A	B	A	B	B	A	A	B	B	B	A	A	A	A	B	A	A	B	A	B	A	B	B
wsnp_Ex_c40976_47910672	TG22712A	IWA3742	2B	105.2		2B	303.7	2B	85.1					A	B	A	A	A	A	A	A	B	A	A	B	B	A	B	A	B	B	A	A	B	B	B	A	A	A	A	B	A	A	B	A	B	A	B	B
Excalibur_c76665_98	TG38872B	IWB28807	2B	105.2		2B	291.86	2B	85.1					A	B	A	A	A	A	A	A	B	A	A	B	B	A	B	A	B	B	A	A	B	B	B	A	A	A	A	B	A	A	B	A	B	A	B	B
wsnp_Ex_c20182_29230528	TG44962A	IWA2514	2B	106.3		2B	303.7	2B	85.1					A	B	A	A	A	A	A	A	B	A	A	B	B	A	B	A	B	B	A	A	B	B	B	A	A	A	A	B	A	A	B	A	B	A	B	B
BS00081231_51	TG37562B	IWB11177	2B	106.3		2B	291.86			2B	62.5754			A	B	A	A	A	A	A	A	B	A	A	B	B	A	B	A	B	B	A	A	B	B	B	A	A	A	A	B	A	A	B	A	B	A	B	B
RAC875_c8197_810	TG4255	IWB60670	2B	106.3		2B	291.86			2B	62.5754			A	B	A	A	A	A	A	A	B	A	A	B	B	A	B	A	B	B	A	A	B	B	B	A	A	A	A	B	A	A	B	A	B	A	B	B
Excalibur_c40976_87	TG3855	IWB26191	2B	106.3		2B	291.86			2B	62.5754			A	B	A	A	A	A	A	A	B	A	A	B	B	A	B	A	B	B	A	A	B	B	B	A	A	A	A	B	A	A	B	A	B	A	B	B
BS00063727_51	TG34052A	IWB9117	2B	106.3		2B	291.86	2B	85.1					A	B	A	A	A	A	A	A	B	A	A	B	B	A	B	A	B	B	A	A	B	B	B	A	A	A	A	B	A	A	B	A	B	A	B	B
BS00010012_51	TG14042D	IWB6150	2B	106.3		2B	291.86			2B	62.5754			A	B	A	A	A	A	A	A	B	A	A	B	B	A	B	A	B	B	A	A	B	B	B	A	A	A	A	B	A	A	B	A	B	A	B	B
GENE-0966_173	TG39222B	IWB32165	2B	106.9		2B	291.86	2B	85.1					A	B	A	A	A	A	A	A	B	A	A	B	B	A	B	A	B	B	A	A	B	B	B	A	A	A	A	B	A	A	B	A	B	A	B	B
Excalibur_c40976_111	TG00502D	IWB26189	2B	106.9		2B	291.86			2B	62.5754			A	B	A	A	A	A	A	A	B	A	A	B	B	A	B	A	B	B	A	A	B	B	B	A	A	A	A	B	A	A	B	A	B	A	B	B
BS00104667_51	TG03832B	IWB12230	2B	106.9		2B	315.8			2B	62.5754			A	B	A	A	A	A	A	A	B	A	A	B	B	A	B	A	B	B	A	A	B	B	B	A	A	A	A	B	A	A	B	A	B	A	B	B
wsnp_Ra_rep_c74497_72390803	TG11552A	IWA8195	2B	106.9		2B	339.86			2B	62.5754			A	B	A	A	A	A	A	A	B	A	A	B	B	A	B	A	B	B	A	A	B	B	B	A	A	A	A	B	A	A	B	A	B	A	B	B
BobWhite_rep_c64049_232	TG1396	IWB5436	2B	106.9		2B	291.86	2B	85.1					A	B	A	A	A	A	A	A	B	A	A	B	B	A	B	A	B	B	A	A	B	B	B	A	A	A	A	B	A	A	B	A	B	A	B	B
BS00023124_51	TG14332B	IWB7433	2B	106.9						2B	62.5754			A	B	A	A	A	A	A	A	B	A	A	B	B	A	B	A	B	B	A	A	B	B	B	A	A	A	A	B	A	A	B	A	B	A	B	B
BS00059896_51	TG14632B	IWB8789	2B	106.9		2B	291.86			2B	62.5754			A	B	A	A	A	A	A	A	B	A	A	B	B	A	B	A	B	B	A	A	B	B	B	A	A	A	A	B	A	A	B	A	B	A	B	B
BS00016650_51	TG24612B	IWB6631	2B	106.9		2B	291.86			2B	62.5754			A	B	A	A	A	A	A	A	B	A	A	B	B	A	B	A	B	B	A	A	B	B	B	A	A	A	A	B	A	A	B	A	B	A	B	B
Excalibur_c76598_570	TG04782B	IWB28799	2B	108		2B	303.28							A	B	A	A	A	A	A	A	B	A	A	B	B	A	B	A	B	B	A	A	B	B	B	A	A	A	A	B	A	A	B	A	B	A	B	B
Excalibur_rep_c111801_55	TG12192D	IWB30560	2B	108		2B	308.49	2B	87.5					A	B	A	A	A	A	A	A	B	A	A	B	B	A	B	A	B	B	A	A	B	B	B	A	A	A	A	B	A	A	B	A	B	A	B	B
Kukri_c52356_96	TG1820	IWB46242	2B	108.6		2B	313.95					2B	158.756	A	B	A	A	A	A	A	A	B	A	A	B	B	A	B	A	B	B	A	A	B	B	B	A	A	A	A	B	A	A	B	A	B	A	B	B
wsnp_Ex_c5619_9884202	TG01742B	IWA4294	2B	109.1		2B	304.77			2B	62.5754	2B	154.803	A	B	A	A	A	A	A	A	B	A	A	B	B	A	B	A	B	B	A	A	B	B	B	A	A	A	A	B	A	A	B	A	B	A	B	B
BS00011630_51	TG14112B	IWB6453	2B	110.2				2B	85.1			2B	155.446	A	B	A	A	A	A	A	A	B	A	A	B	B	A	B	A	B	B	A	A	B	B	B	A	A	A	A	B	A	A	B	A	B	A	B	B
CAP8_rep_c6372_264	TG15382B	IWB15055	2B	110.2						2B	62.5754	2B	154.803	A	B	A	A	A	A	A	A	B	A	A	B	B	A	B	A	B	B	A	A	B	B	B	A	A	A	A	B	A	A	B	A	B	A	B	B
wsnp_Ra_c13679_21569624	TG23862B	IWA7615	2B	110.2		2B	304.77	2B	85.1					A	B	A	A	A	A	A	A	B	A	A	B	B	A	B	A	B	B	A	A	B	B	B	A	A	A	A	B	A	A	B	A	B	A	B	B
tplb0048g05_866	TG09692B	IWB74910	2B	110.2		2B	315.8			2B	62.5754	2B	155.079	A	B	A	A	A	A	A	A	B	A	A	B	B	A	B	A	B	B	A	A	B	B	B	A	A	A	A	B	A	A	B	A	B	A	B	B
BS00067572_51	TG00242B	IWB10081	2B	110.2		2B	315.8	2B	85.9			2B	155.079	A	B	A	A	A	A	A	A	B	A	A	B	B	A	B	A	B	B	A	A	B	B	B	A	A	A	A	B	A	A	B	A	B	A	B	B
CAP8_rep_c8162_101	TG34312A	IWB15068	2B	110.8		2B	307.19			2B	62.5754	2B	154.803	A	B	A	A	A	A	A	A	B	A	A	B	B	A	B	A	B	B	A	A	B	B	B	A	A	A	A	B	A	A	B	A	B	A	B	B
wsnp_CAP11_rep_c4111_1943544	TG21892B	IWA840	2B	110.8		2B	304.77			2B	62.5754			A	B	A	A	A	A	A	A	B	A	A	B	B	A	B	A	B	B	A	A	B	B	B	A	A	A	A	B	A	A	B	A	B	A	B	B
BobWhite_c8253_397	TG2436	IWB4443	2B	110.8		2B	291.86	2B	85.1			2B	154.803	A	B	A	A	A	A	A	A	B	A	A	B	B	A	B	A	B	B	A	A	B	B	B	A	A	A	A	B	A	A	B	A	B	A	B	B
Kukri_rep_c101529_1199	TG1854	IWB48659	2B	113		2B	296.69							A	B	A	A	A	A	A	A	A	A	A	B	B	A	B	A	B	B	A	A	B	B	H	A	A	A	A	B	A	A	B	A	B	A	B	B
BS00009247_51	TG36542B	IWB6031	2B	113		2B	296.69							A	B	A	A	A	A	A	A	A	A	A	B	B	A	B	A	B	B	A	A	B	B	H	A	A	A	A	B	A	A	B	A	B	A	B	B
Tdurum_contig12459_491	TG43442B	IWB67608	2B	113		2B	286.06	2B	74.9	2B	57.9697			A	B	A	A	A	A	A	A	A	A	A	B	B	A	B	A	B	B	A	A	B	B	H	A	A	A	A	B	A	A	B	A	B	A	B	B
BobWhite_rep_c64679_73	TG00062A	IWB5492	2B	113		2B	300.84			2B	59.9479			A	B	A	A	A	A	A	A	A	A	A	B	B	A	B	A	B	B	A	A	B	B	H	A	A	A	A	B	A	A	B	A	B	A	B	B
Kukri_c49010_266	TG18172B	IWB45933	2B	113		2B	296.69							A	B	A	A	A	A	A	A	A	A	A	B	B	A	B	A	B	B	A	A	B	B	H	A	A	A	A	B	A	A	B	A	B	A	B	B
wsnp_Ex_c58274_59639258	TG32572B	IWA4358	2B	113.6		2B	287.09							A	B	A	A	A	A	A	A	A	A	A	B	B	A	B	A	B	B	A	A	B	B	H	A	A	A	A	B	A	A	B	A	B	A	B	B
BS00066719_51	TG14801B	IWB9873	2B	114.1		2B	336.25							A	B	A	A	A	A	A	A	A	A	A	B	B	A	B	A	B	B	A	A	B	B	A	A	A	A	A	B	A	A	B	A	B	A	B	B
Excalibur_c65341_303	TG04732B	IWB28363	2B	115.3		2B	314.51	2B	87.5	2B	60.6016	2B	159.123	A	B	A	A	A	A	A	A	A	A	A	B	B	A	B	A	B	B	A	A	B	B	B	A	A	A	A	B	A	A	B	A	B	A	B	B
IACX6309	TG05792A	IWB36140	2B	115.3		2B	334.51	2B	87.5	2B	62.5754	2B	158.756	A	B	A	A	A	A	A	A	A	A	A	B	B	A	B	A	B	B	A	A	B	B	H	A	A	A	A	B	A	A	B	A	B	A	B	B
Excalibur_c46178_303	TG1610	IWB26742	2B	115.3		2B	314.27	2B	87.5	2B	61.9175	2B	159.399	A	B	A	A	-	A	A	A	A	A	A	B	B	A	B	A	B	B	A	A	B	B	H	A	A	-	A	B	A	A	B	A	B	A	B	B
Kukri_c84629_315	TG18462A	IWB48012	2B	115.3		2B	314.51	2B	87.5	2B	61.9175	2B	159.123	A	B	A	A	A	A	A	A	A	A	A	B	B	A	B	A	B	B	A	A	B	B	H	A	A	A	A	B	A	A	B	A	B	A	B	B
BobWhite_c3056_2737	TG1374	IWB2373	2B	115.8		2B	300.84							A	B	A	A	A	A	A	A	A	A	A	B	B	A	B	A	B	B	A	A	B	B	A	A	A	A	A	B	A	A	B	A	B	A	B	B
Excalibur_c105074_293	TG1557	IWB21660	2B	115.8		2B	300.84			2B	59.9479	2B	151.677	A	B	A	A	A	A	A	A	A	A	A	B	B	A	B	A	B	B	A	A	B	B	A	A	A	A	A	B	A	A	B	A	B	A	B	B
TA004957-0405	TG3059	IWB65910	2B	115.8		2B	300.84							A	B	A	A	A	A	A	A	A	A	A	B	B	A	B	A	B	B	A	A	B	B	A	A	A	A	A	B	A	A	B	A	B	A	B	B
Tdurum_contig5691_596	TG31172B	IWB72542	2B	116.9		2B	300.84							A	B	A	A	A	A	A	A	A	A	A	B	B	A	B	A	B	B	A	A	B	B	-	A	A	A	A	B	A	A	B	A	B	A	B	B
Kukri_c75902_132	TG41062B	IWB47664	2B	116.9		2B	300.84					2B	151.677	A	B	A	A	A	A	A	A	A	A	A	B	B	A	B	A	B	B	A	A	B	B	H	A	A	A	A	B	A	A	B	A	B	A	B	B
Excalibur_rep_c108225_302	TG04992B	IWB30332	2B	117.5		2B	300.84			2B	58.6233	2B	151.677	A	B	A	A	A	A	A	A	A	A	A	B	B	A	B	A	B	B	A	A	B	B	H	A	A	A	A	B	A	A	B	A	B	A	B	B
BobWhite_c41676_137	TG13832A	IWB3192	2B	117.5		2B	300.84	2B	82					A	B	A	A	A	A	A	A	A	A	A	B	B	A	B	A	B	B	A	A	B	B	H	A	A	A	A	B	A	A	B	A	B	A	B	B
Tdurum_contig59522_262	TG21132B	IWB72650	2B	117.5		2B	300.84			2B	58.6233			A	B	A	A	A	A	A	A	A	A	A	B	B	A	B	A	B	B	A	A	B	B	H	A	A	A	A	B	A	A	B	A	B	A	B	B
BS00080967_51	TG25502B	IWB11159	2B	117.5		2B	286.74	2B	82	2B	57.9697	2B	151.677	A	B	A	A	A	A	A	A	A	A	A	B	B	A	B	A	B	B	A	A	B	B	H	A	A	A	A	B	A	A	B	A	B	A	B	B
Tdurum_contig68666_570	TG31282B	IWB73114	2B	117.5		2B	300.84			2B	58.6233	2B	151.677	A	B	A	A	A	A	A	A	A	A	A	B	B	A	B	A	B	B	A	A	B	B	H	A	A	A	A	B	A	A	B	A	B	A	B	B
CAP7_c1933_170	TG38007A	IWB13870	2B	117.5		2B	300.84			2B	59.9479	2B	151.677	A	B	A	A	A	A	A	A	A	A	A	B	B	A	B	A	B	B	A	A	B	B	H	A	A	A	A	B	A	A	B	A	B	A	B	B
Kukri_c18459_2622	TG40342B	IWB41975	2B	117.5		2B	300.84	2B	82	2B	57.9697	2B	151.677	A	B	A	A	A	A	A	A	A	A	A	B	B	A	B	A	B	B	A	A	B	B	H	A	A	A	A	B	A	A	B	A	B	A	B	B
Tdurum_contig10219_295	TG01382A	IWB66366	2B	118.1		2B	313.77	2B	87.5	2B	61.9175	2B	160.41	A	B	A	A	A	A	A	A	A	A	A	B	B	A	B	A	B	B	A	A	B	B	B	A	A	A	A	B	A	A	B	A	B	A	B	B
IACX2158	TG05722B	IWB35840	2B	118.1		2B	315.03			2B	61.9175			A	B	A	A	A	A	A	A	A	A	A	B	B	A	B	A	B	B	A	A	B	B	H	A	A	A	A	B	A	A	B	A	B	A	B	B
RFL_Contig3172_1752	TG20112B	IWB64246	2B	118.1		2B	313.77	2B	95.4	2B	61.9175	2B	160.778	A	B	A	A	A	A	A	A	A	A	A	B	B	A	B	A	B	B	A	A	B	B	-	A	A	A	A	B	A	A	B	A	B	A	B	B
Excalibur_c7449_587	TG34452A	IWB28722	2B	118.1		2B	313.77	2B	87.5	2B	61.9175	2B	158.388	A	B	A	A	A	A	A	A	A	A	A	B	B	A	B	A	B	B	A	A	B	B	H	A	A	A	A	B	A	A	B	A	B	A	B	B
BS00092869_51	TG37672B	IWB11780	2B	118.6		2B	334.51	2B	87.5					A	B	A	A	A	A	A	A	A	A	A	B	B	A	B	A	B	B	A	A	B	B	H	A	A	A	A	B	A	A	B	A	B	A	B	B
BS00046164_51	TG00162B	IWB8419	2B	119.2		2B	318.24	2B	87.5	2B	61.9175			A	B	A	A	A	A	A	A	A	A	A	B	B	A	B	A	B	B	A	A	B	B	H	A	A	A	A	B	A	A	B	A	B	A	B	B
Excalibur_c36280_764	TG00492B	IWB25695	2B	119.2		2B	318.24	2B	87.5	2B	61.9175	2B	159.399	A	B	A	A	A	A	A	A	A	A	A	B	B	A	B	A	B	B	A	A	B	B	H	A	A	A	A	B	A	A	B	A	B	A	B	B
BS00046165_51	TG14522B	IWB8420	2B	119.2		2B	318.24	2B	87.5	2B	61.9175			A	B	A	A	A	A	A	A	A	A	A	B	B	A	B	A	B	B	A	A	B	B	H	A	A	A	A	B	A	A	B	A	B	A	B	B
RFL_Contig2577_584	TG2007	IWB63996	2B	119.2		2B	318.75	2B	87.5					A	B	A	A	A	A	A	A	A	A	A	B	B	A	B	A	B	B	A	A	B	B	A	A	A	A	A	B	A	A	B	A	B	A	B	B
wsnp_Ex_c11748_18884081	TG31852B	IWA1534	2B	119.2		2A	414.46	2B	87.5					A	B	A	A	A	A	A	A	A	A	A	B	B	A	B	A	B	B	A	A	B	B	A	A	A	A	A	B	A	A	B	A	B	A	B	B
RAC875_c29937_325	TG41952B	IWB56400	2B	119.7		2B	327.9	2B	87.5			2B	163.444	A	B	A	A	A	A	A	A	A	A	A	B	B	A	B	A	B	B	A	A	B	B	-	A	A	A	A	B	A	A	B	A	B	A	B	B
BobWhite_c32938_177	TG36232B	IWB2592	2B	120.3		2B	335.89	2B	87.5					A	B	A	A	A	A	A	A	A	A	A	B	B	A	B	A	B	B	A	A	B	B	H	A	A	A	A	B	A	A	B	A	B	A	B	B
BobWhite_c38001_528	TG02242B	IWB2943	2B	120.9		2B	334.51	2B	87.5			2B	164.455	A	B	A	A	A	A	A	A	A	A	A	B	B	A	B	A	B	B	A	A	B	B	H	A	A	A	A	B	A	A	B	A	B	A	B	B
tplb0024l03_910	TG21442B	IWB74201	2B	120.9		2B	334.83	2B	87.5			2B	164.455	A	B	A	A	A	A	A	A	A	A	A	B	B	A	B	A	B	B	A	A	B	B	H	A	A	A	A	B	A	A	B	A	B	A	B	B
Excalibur_c80601_308	TG26802B	IWB28962	2B	120.9		2B	334.83	2B	87.5			2B	164.455	A	B	A	A	A	A	A	A	A	A	A	B	B	A	B	A	B	B	A	A	B	B	H	A	A	A	A	B	A	A	B	A	B	A	B	B
Excalibur_c80601_83	TG38892B	IWB28963	2B	121.4		2B	334.83	2B	87.5					A	B	A	A	A	A	A	A	A	A	A	B	B	A	B	A	B	B	A	A	B	B	H	A	A	A	A	B	A	A	B	A	B	A	B	B
Excalibur_c60964_203	TG26702B	IWB28002	2B	122										A	B	A	A	A	A	A	A	A	A	A	B	B	A	B	A	B	B	A	A	B	B	B	A	A	A	A	B	A	A	B	A	B	A	B	B
Excalibur_c2484_2113	TG15812B	IWB24230	2B	122.5		2B	335.89	2B	87.5	2B	63.2334			A	B	A	A	A	A	A	A	A	A	A	B	B	A	B	A	B	B	A	A	B	B	H	A	A	A	A	B	A	A	B	A	B	A	B	B
Excalibur_c6735_214	TG1626	IWB28470	2B	123.7		2B	336.25							A	B	A	A	A	A	A	A	A	A	A	B	B	A	B	A	B	B	A	A	B	B	-	A	A	A	A	B	A	B	B	A	B	A	B	B
Excalibur_c13180_67	TG2613	IWB22223	2B	123.7		2B	336.25							A	B	A	A	A	A	A	A	A	A	A	B	B	A	B	A	B	B	A	A	B	B	H	A	A	A	A	B	A	B	B	A	B	A	B	B
TA002338-0901	TG3053	IWB65537	2B	123.7		2B	336.25							A	B	A	A	A	A	A	A	A	A	A	B	B	A	B	A	B	B	A	A	B	B	H	A	A	A	A	B	A	B	B	A	B	A	B	B
wsnp_Ra_c4660_8405634	TG01942B	IWA7955	2B	124.2		2B	336.19					2B	167.764	A	B	A	A	A	A	A	A	A	A	A	B	B	A	B	A	B	B	A	A	B	B	H	A	A	A	A	B	A	B	B	A	B	A	B	B
Tdurum_contig42046_1426	TG13022B	IWB70766	2B	124.2		2B	336.25							A	B	A	A	A	A	A	A	A	A	A	B	B	A	B	A	B	B	A	A	B	B	H	A	A	A	A	B	A	B	B	A	B	A	B	B
wsnp_Ex_rep_c101581_86924089	TG13402B	IWA5024	2B	124.2		2B	336.19					2B	167.764	A	B	A	A	A	A	A	A	A	A	A	B	B	A	B	A	B	B	A	A	B	B	H	A	A	A	A	B	A	B	B	A	B	A	B	B
Tdurum_contig78534_314	TG44072B	IWB73441	2B	124.2		2B	336.19							A	B	A	A	A	A	A	A	A	A	A	B	B	A	B	A	B	B	A	A	B	B	H	A	A	A	A	B	A	B	B	A	B	A	B	B
Excalibur_c5801_177	TG0054	IWB27775	2B	124.8		2B	336.19					2B	167.764	A	B	A	A	A	A	A	A	A	A	A	B	B	A	B	A	B	B	A	A	B	B	H	A	A	A	A	B	A	B	B	A	B	A	B	B
wsnp_CAP7_c1592_791887	TG31712B	IWA1040	2B	125.4		2B	338.72	2B	87.5			2B	167.764	A	B	A	A	A	A	A	A	A	A	A	B	B	A	B	A	B	B	A	A	B	B	H	A	A	A	A	B	A	B	B	A	B	A	B	B
wsnp_Ra_c3955_7262354	TG11472B	IWA7909	2B	125.4		2B	335.7	2B	87.5					A	B	A	A	A	A	A	A	A	A	A	B	B	A	B	A	B	B	A	A	B	B	H	A	A	A	A	B	A	B	B	A	B	A	B	B
RAC875_c50422_299	TG12802B	IWB58646	2B	127		2B	351.79	2B	87.5			2D	145.3	A	B	A	A	A	A	A	A	A	A	A	B	B	A	B	A	B	B	A	A	B	B	B	A	A	A	A	B	A	B	B	A	B	A	B	B
BS00022295_51	TG14262B	IWB7010	2B	127		2B	339.86	2B	87.5			2B	171.809	A	B	A	A	A	A	A	A	A	A	A	B	B	A	B	A	B	B	A	A	B	B	H	A	A	A	A	B	A	B	B	A	B	A	B	B
wsnp_RFL_Contig1892_1042675	TG3363	IWA8266	2B	127		2B	351.79	2B	87.5			2B	169.787	A	B	A	A	A	A	A	A	A	A	A	B	B	A	B	A	B	B	A	A	B	B	B	A	A	A	A	B	A	B	B	A	B	A	B	B
Ra_c13298_783	TG12652B	IWB51053	2B	128.7		2B	339.23	2B	87.5					A	B	A	A	A	A	A	A	A	A	A	B	B	A	B	A	B	B	A	A	B	B	H	A	A	A	A	B	A	B	B	A	B	A	B	B
RAC875_c29913_139	TG29392D	IWB56398	2B	128.7		2B	339.86	2B	87.5					A	B	A	A	A	A	A	A	A	A	A	B	B	A	B	A	B	B	A	A	B	B	-	A	A	A	A	B	A	B	B	A	B	A	B	B
BS00065327_51	TG46932B	IWB9514	2B	129.3		2B	339.86	2B	87.5					A	B	A	A	A	A	A	A	A	A	A	B	B	A	B	A	B	B	A	A	B	B	H	A	A	A	A	B	A	B	B	A	B	A	B	B
wsnp_Ex_rep_c67838_66536117	TG10872B	IWA5460	2B	131.5		2B	348.73			2B	76.4631			A	B	A	A	B	A	A	A	A	A	A	B	B	A	B	A	B	B	A	A	B	B	H	A	A	A	A	B	A	B	B	A	B	A	B	B
Tdurum_contig28795_273	TG43602B	IWB69629	2B	131.5		2B	351.79	2B	105.8	2B	76.4631			A	B	A	A	B	A	A	A	A	A	A	B	B	A	B	A	B	B	A	A	B	B	H	A	A	A	A	B	A	B	B	A	B	A	B	B
BS00009060_51	TG00082B	IWB6028	2B	132.6		2B	354.73			2B	78.5771			A	B	A	A	B	A	A	A	A	A	A	B	B	A	B	A	B	B	A	A	B	B	A	A	A	A	A	B	A	B	B	A	B	A	B	B
BS00100981_51	TG03812B	IWB12155	2B	132.6		2B	354.34			2B	78.5771			A	B	A	A	B	A	A	A	A	A	A	B	B	A	B	A	B	B	A	A	B	B	H	A	A	A	A	B	A	B	B	A	B	A	B	B
Tdurum_contig9214_279	TG09532B	IWB73784	2B	132.6		2B	355.55			2B	79.2393			A	B	A	A	B	A	A	A	A	A	A	B	B	A	B	A	B	B	A	A	B	B	-	A	A	A	A	B	A	B	B	A	B	A	B	B
Excalibur_c8720_297	TG2686	IWB29196	2B	132.6										A	B	A	A	B	A	A	A	A	A	A	B	B	A	B	A	B	B	A	A	B	B	-	A	A	A	A	B	A	B	B	A	B	A	B	B
IAAV6288	TG34622D	IWB35179	2B	132.6		2B	354.73			2B	78.5771			A	B	A	A	B	A	A	A	A	A	A	B	B	A	B	A	B	B	A	A	B	B	-	A	A	A	A	B	A	B	B	A	B	A	B	B
Excalibur_c10637_515	TG38252B	IWB21693	2B	132.6		2B	354.34			2B	78.5771			A	B	A	A	B	A	A	A	A	A	A	B	B	A	B	A	B	B	A	A	B	B	H	A	A	A	A	B	A	B	B	A	B	A	B	B
RAC875_c16752_283	TG4167	IWB54357	2B	132.6		2B	354.34	2B	111.3	2B	79.2393			A	B	A	A	B	A	A	A	A	A	A	B	B	A	B	A	B	B	A	A	B	B	H	A	A	A	A	B	A	B	B	A	B	A	B	B
RAC875_c66695_560	TG42492B	IWB60041	2B	132.6		2B	374.05			2B	79.2393			A	B	A	A	B	A	A	A	A	A	A	B	B	A	B	A	B	B	A	A	B	B	H	A	A	A	A	B	A	B	B	A	B	A	B	B
wsnp_JD_c12346_12606967	TG45882B	IWA5809	2B	132.6		2B	355.84			2B	79.2393			A	B	A	A	B	A	A	A	A	A	A	B	B	A	B	A	B	B	A	A	B	B	H	A	A	A	A	B	A	B	B	A	B	A	B	B
Jagger_c7991_95	TG39902B	IWB36765	2B	133.2										A	B	A	A	B	A	A	A	B	A	A	B	B	A	B	A	B	B	A	A	B	B	B	A	A	A	A	B	A	B	B	A	B	A	B	B
BS00022805_51	TG02812B	IWB7265	2B	133.8		2B	354.34							A	B	A	A	B	A	A	A	B	A	A	B	B	A	B	A	B	B	A	A	B	B	B	A	A	A	A	B	A	B	B	A	B	A	B	B
CAP11_c2941_210	TG34252B	IWB12817	2B	134.9		2B	355.84					2B	187.896	A	B	A	A	B	A	A	A	B	A	A	B	B	A	B	A	B	B	A	A	B	B	B	A	A	A	A	B	A	B	B	A	B	A	B	B
BS00076000_51	TG25462B	IWB10845	2B	134.9		2B	368.74							A	B	A	A	B	A	A	A	B	A	A	B	B	A	B	A	B	B	A	A	B	B	B	A	A	A	A	B	A	B	B	A	B	A	B	B
wsnp_Ex_rep_c103064_88104690	TG10822B	IWA5081	2B	136		2B	368.74							A	B	A	A	B	A	A	A	A	A	A	B	B	A	B	A	B	B	A	A	B	B	H	A	A	A	A	B	A	B	B	A	B	A	B	B
BS00068181_51	TG25312B	IWB10251	2B	136		2B	368.82							A	B	A	A	B	A	A	A	A	A	A	B	B	A	B	A	B	B	A	A	B	B	H	A	A	A	A	B	A	B	B	A	B	A	B	B
Excalibur_c42146_338	TG3858	IWB26301	2B	136.6		2B	373.79							A	B	A	A	B	A	A	A	A	A	A	B	B	A	B	A	B	B	A	A	B	B	H	A	A	A	A	B	A	B	B	A	B	A	B	B
BS00026432_51	TG02902B	IWB7626	2B	137.1		2B	373.79							A	B	A	A	B	A	A	A	A	A	A	B	B	A	B	A	B	B	A	A	B	B	H	A	A	A	A	B	A	B	B	A	B	A	B	B
BS00063236_51	TG37232A	IWB9024	2B	137.1		2B	373.79							A	B	A	A	B	A	A	A	A	A	A	B	B	A	B	A	B	B	A	A	B	B	-	A	A	A	A	B	A	B	B	A	B	A	B	B
IAAV283	TG0543	IWB34617	2B	138.3		2B	384.06					2B	189.643	A	B	A	A	B	A	A	A	B	A	A	B	B	A	B	A	B	B	A	A	B	B	B	A	A	A	A	B	A	B	B	A	B	A	B	B
RAC875_c27650_216	TG07502A	IWB56090	2B	139.9		2B	386.2	2B	122.5					A	B	A	A	B	A	A	A	A	A	A	B	B	A	B	A	B	B	A	A	B	B	B	A	A	A	A	B	A	B	B	A	B	A	B	B
BobWhite_c42601_173	TG1164	IWB3249	2B	139.9		2B	384.06							A	B	A	A	B	A	A	A	A	A	A	B	B	A	B	A	B	B	A	A	B	B	H	A	A	A	A	B	A	B	B	A	B	A	B	B
Excalibur_c9752_289	TG16372B	IWB29590	2B	139.9		2B	384.06							A	B	A	A	B	A	A	A	A	A	A	B	B	A	B	A	B	B	A	A	B	B	H	A	A	A	A	B	A	B	B	A	B	A	B	B
Kukri_c30020_302	TG17912A	IWB43797	2B	139.9		2B	384.06							A	B	A	A	B	A	A	A	A	A	A	B	B	A	B	A	B	B	A	A	B	B	-	A	A	A	A	B	A	B	B	A	B	A	B	B
Kukri_c12117_134	TG4773	IWB40742	2B	139.9		2B	372.49							A	B	A	A	B	A	A	A	A	A	A	B	B	A	B	A	B	B	A	A	B	B	H	A	A	A	A	B	A	B	B	A	B	A	B	B
GENE-1355_130	TG39252D	IWB32416	2B	139.9		2B	384.06							A	B	A	A	B	A	A	A	A	A	A	B	B	A	B	A	B	B	A	A	B	B	H	A	A	A	A	B	A	B	B	A	B	A	B	B
Kukri_c11915_313	TG17592D	IWB40702	2B	139.9		2B	384.06							A	B	A	A	B	A	A	A	A	A	A	B	B	A	B	A	B	B	A	A	B	B	-	A	A	A	A	B	A	B	B	A	B	A	B	B
Kukri_c50391_219	TG18192A	IWB46065	2B	139.9		2B	384.06							A	B	A	A	B	A	A	A	A	A	A	B	B	A	B	A	B	B	A	A	B	B	A	A	A	A	A	B	A	B	B	A	B	A	B	B
wsnp_BG605258B_Ta_2_7	TG21822B	IWA571	2B	139.9		2B	384.06							A	B	A	A	B	A	A	A	A	A	A	B	B	A	B	A	B	B	A	A	B	B	H	A	A	A	A	B	A	B	B	A	B	A	B	B
BS00084417_51	TG11922B	IWB11366	2B	139.9		2B	384.06							A	B	A	A	B	A	A	A	A	A	A	B	B	A	B	A	B	B	A	A	B	B	H	A	A	A	A	B	A	B	B	A	B	A	B	B
Excalibur_c9752_619	TG38972B	IWB29591	2B	139.9						2B	89.376			A	B	A	A	B	A	A	A	A	A	A	B	B	A	B	A	B	B	A	A	B	B	H	A	A	A	A	B	A	B	B	A	B	A	B	B
Excalibur_c10441_984	TG04192B	IWB21638	2B	139.9										A	B	A	A	B	A	A	A	A	A	A	B	B	A	B	A	B	B	A	A	B	B	-	A	A	A	A	B	A	B	B	A	B	A	B	B
Excalibur_c224_1383	TG15762D	IWB23797	2B	139.9		2B	384.06							A	B	A	A	B	A	A	A	A	A	A	B	B	A	B	A	B	B	A	A	B	B	H	A	A	A	A	B	A	B	B	A	B	A	B	B
RAC875_c65882_668	TG42482B	IWB59983	2B	139.9		2B	384.06			2B	91.9927			A	B	A	A	B	A	A	A	A	A	A	B	B	A	B	A	B	B	A	A	B	B	B	A	A	A	A	B	A	B	B	A	B	A	B	B
BobWhite_rep_c50285_700	TG11692B	IWB4865	2B	140.5		2B	381.35	2B	123.2	2B	89.376			A	B	A	A	B	A	A	A	A	A	A	B	B	A	B	A	B	B	A	A	B	B	H	A	A	A	A	B	A	B	B	A	B	A	B	B
BS00080318_51	TG34152B	IWB11123	2B	140.5		2B	371.11			2B	91.9927			A	B	A	A	B	A	A	A	A	A	A	B	B	A	B	A	B	B	A	A	B	B	H	A	A	A	A	B	A	B	B	A	B	A	B	B
RAC875_c57353_245	TG07962B	IWB59281	2B	141.1		2B	384.06					2B	203.156	A	B	A	A	B	A	A	A	B	A	A	B	B	A	B	A	B	B	A	A	B	B	B	A	A	A	A	B	A	B	B	A	B	A	B	B
Kukri_c18754_67	TG17722B	IWB42028	2B	141.6		2B	384.06							A	B	H	A	B	A	A	A	B	A	A	B	B	A	B	A	B	B	A	A	B	B	B	A	A	A	A	B	A	B	B	A	B	A	B	B
RAC875_c30797_179	TG0757	IWB56526	2B	142.2		2B	385.64	2B	126.3			2B	203.156	A	B	A	A	B	A	A	A	B	A	A	B	B	A	B	A	B	B	A	A	B	B	B	A	A	A	A	B	A	B	B	A	B	A	B	B
Excalibur_c7051_1027	TG26752B	IWB28561	2B	143.3		2B	390.93	2B	126.3			2B	203.156	A	B	A	A	B	A	A	A	B	A	A	B	B	A	B	A	B	B	A	A	B	B	B	A	A	A	A	B	A	B	B	A	A	A	B	B
Kukri_c27631_1329	TG40472B	IWB43464	2B	143.3		2B	390.93	2B	126.3			2B	203.156	A	B	A	A	B	A	A	A	B	A	A	B	B	A	B	A	B	B	A	A	B	B	B	A	A	A	A	B	A	B	B	A	A	A	B	B
RFL_Contig3713_316	TG43072B	IWB64462	2B	143.3		2B	390.93	2B	126.3					A	B	A	A	B	A	A	A	B	A	A	B	B	A	B	A	B	B	A	A	B	B	B	A	A	A	A	B	A	B	B	A	A	A	B	B
Kukri_c34553_89	TG18012B	IWB44344	2B	143.9		2B	392.53	2B	126.3					A	B	A	A	B	A	A	A	A	A	A	B	B	A	B	A	B	B	A	A	B	B	H	A	A	A	A	B	A	B	B	A	A	A	B	B
RAC875_c98387_130	TG35092B	IWB61238	2B	143.9		2B	392.53	2B	126.3					A	B	A	A	B	A	A	A	A	A	A	B	B	A	B	A	B	B	A	A	B	B	-	A	A	A	A	B	A	B	B	A	A	A	B	B
RAC875_c37540_583	TG4208	IWB57295	2B	149.5		2B	391.98							A	B	A	A	B	A	A	A	A	A	A	B	B	A	B	A	B	B	A	A	B	B	H	A	A	A	A	B	A	B	B	A	A	A	B	B
RAC875_c37540_565	TG07672D	IWB57294	2B	150		2B	391.98					2B	203.524	A	B	A	A	B	A	A	A	B	A	A	B	B	A	B	A	B	B	A	A	B	B	B	A	A	A	A	B	A	B	B	A	A	A	B	B
Kukri_c96357_134	TG4116	IWB48440	2B	150		2B	391.98							A	B	A	A	B	A	A	A	B	A	A	B	B	A	B	A	B	B	A	A	B	B	B	A	A	A	A	B	A	B	B	A	A	A	B	B
RAC875_c1858_2693	TG07362A	IWB54701	2B	153.9		2B	396.66	2B	129.4			2B	203.156	A	B	A	A	B	A	A	A	B	A	A	B	A	A	B	A	B	B	A	A	B	B	B	A	A	A	A	B	A	B	B	A	A	A	B	B
Kukri_c55909_1109	TG40922B	IWB46560	2B	153.9		2B	396.66					2B	203.156	A	B	A	A	B	A	A	A	B	A	A	B	A	A	B	A	B	B	A	A	B	B	B	A	A	A	A	B	A	B	B	A	A	A	B	B
RFL_Contig2751_1562	TG08542B	IWB64039	2B	159.6		2B	409.81	2B	131.7	2B	102.603	2B	207.844	A	B	A	A	B	A	A	A	B	A	A	B	A	A	B	A	B	B	A	A	B	B	H	A	A	B	A	B	A	B	B	A	A	A	B	B
Ex_c52711_584	TG38162B	IWB20875	2B	159.6		2B	410.02					2B	206.833	A	B	A	A	B	A	A	A	B	A	A	B	A	A	B	A	B	B	A	A	B	B	B	A	A	B	A	B	A	B	B	A	A	A	B	B
BobWhite_rep_c64068_241	TG02492B	IWB5439	2B	160.1		2B	412.14	2B	131.7					A	B	A	A	B	A	A	A	B	A	A	B	A	A	B	A	B	B	A	A	B	B	H	A	A	B	A	B	A	B	B	A	A	A	B	B
Excalibur_c56550_71	TG04652B	IWB27661	2B	160.1		2B	413.14	2B	131.7					A	B	A	A	B	A	A	A	B	A	A	B	A	A	B	A	B	B	A	A	B	B	H	A	A	B	A	B	A	B	B	A	A	A	B	B
Kukri_c10869_1591	TG40212D	IWB40456	2B	160.1		2B	413.14	2B	131.7					A	B	A	A	B	A	A	A	B	A	A	B	A	A	B	A	B	B	A	A	B	B	H	A	A	B	A	B	A	B	B	A	A	A	B	B
Kukri_c657_1139	TG18382B	IWB47253	2B	160.7		2B	396.26	2B	129.4					A	B	A	A	B	A	A	A	A	A	A	B	A	A	B	A	B	B	A	A	B	B	H	A	A	B	A	B	A	B	B	A	A	A	B	B
CAP7_c16_483	TG03992B	IWB13830	2B	173.8		2B	421.43	2B	134.8	2B	109.249			A	B	A	A	B	A	A	A	A	A	A	A	A	A	B	A	B	B	A	A	B	B	H	A	A	B	A	B	A	B	B	B	A	A	B	B
wsnp_Ex_c34303_42642389	TG48412B	IWA3474	2B	173.8		2B	417.12	2B	134.8	2B	109.249			A	B	A	A	B	A	A	A	A	A	A	A	A	A	B	A	B	B	A	A	B	B	H	A	A	B	A	B	A	B	B	B	A	A	B	B
BS00067878_51	TG03402B	IWB10173	2B	179.5		2B	425.03	2B	135.5					A	B	A	A	B	A	A	A	A	A	A	A	A	A	B	A	B	B	B	A	B	B	H	A	A	B	A	A	A	B	B	B	A	A	A	B
BS00004413_51	TG24482B	IWB5978	2B	179.5		2B	424.98							A	B	A	A	B	A	A	A	A	A	A	A	A	A	B	A	B	B	B	A	B	B	H	A	A	B	A	A	A	B	B	B	A	A	A	B
wsnp_Ex_c298_580660	TG10332B	IWA3252	2B	179.5		2B	427.72	2B	135.5			2B	224.023	A	B	A	A	B	A	A	A	A	A	A	A	A	A	B	A	B	B	B	A	B	B	H	A	A	B	A	A	A	B	B	B	A	A	A	B
Kukri_c94792_127	TG28722B	IWB48388	2B	179.5		2B	426.73			2B	114.575			A	B	A	A	B	A	A	A	A	A	A	A	A	A	B	A	B	B	B	A	B	B	H	A	A	B	A	A	A	B	B	B	A	A	A	B
BS00022185_51	TG33892B	IWB6956	2B	180		2B	455.16							A	B	A	A	B	A	A	A	B	A	A	A	A	A	B	A	B	B	B	A	B	B	A	A	A	B	A	A	A	B	B	B	A	A	A	B
BS00039187_51	TG24962B	IWB8157	2B	180.6		2B	425.57	2B	135.5					A	B	A	A	B	A	A	A	B	A	A	A	A	A	B	A	B	B	B	A	B	B	H	A	A	B	A	A	A	B	B	B	A	A	A	B
IACX8602	TG27782D	IWB36313	2B	180.6		2B	425.03	2B	135.5					A	B	A	A	B	A	A	A	B	A	A	A	A	A	B	A	B	B	B	A	B	B	H	A	A	B	A	A	A	B	B	B	A	A	A	B
RAC875_c16993_444	TG41682B	IWB54390	2B	182.3		2B	455.16							A	B	A	A	B	A	A	A	B	A	A	A	A	A	B	A	B	B	B	A	B	B	A	A	A	B	A	A	A	B	B	B	A	A	A	B
wsnp_Ex_c41300_48154348	TG45322B	IWA3773	2B	182.3		2B	430.89			2B	115.9	2B	225.678	A	B	A	A	B	A	A	A	B	A	A	A	A	A	B	A	B	B	B	A	B	B	H	A	A	B	A	A	A	B	B	B	A	A	A	B
RAC875_c16993_196	TG07312B	IWB54389	2B	183.4		2B	427.36	2B	135.5					A	B	A	A	B	A	A	A	A	A	A	A	A	A	B	A	B	B	B	A	B	B	H	A	A	B	A	-	A	B	B	B	A	A	A	B
Excalibur_c5193_64	TG26612B	IWB27274	2B	183.4		2B	430.89							A	B	A	A	B	A	A	A	A	A	A	A	A	A	B	A	B	B	B	A	B	B	H	A	A	B	A	A	A	B	B	B	A	A	A	B
Jagger_c10188_98	TG39862B	IWB36409	2B	183.4		2B	427.36	2B	135.5					A	B	A	A	B	A	A	A	A	A	A	A	A	A	B	A	B	B	B	A	B	B	H	A	A	B	A	A	A	B	B	B	A	A	A	B
Excalibur_c33525_279	TG15972D	IWB25347	2B	185.1		2B	432.79	2B	135.5	2B	114.575			A	B	A	A	B	A	A	A	A	A	A	A	A	A	B	A	B	B	B	A	B	B	H	A	A	B	A	A	A	B	B	B	A	A	A	B
wsnp_Ex_c12675_20144479	TG22062B	IWA1667	2B	186.2		2B	420.02	2B	135.5			2B	226.689	A	B	A	A	B	A	A	A	A	A	A	A	A	A	B	A	B	B	B	A	A	B	H	A	A	B	A	A	A	B	B	B	A	A	A	B
BS00100118_51	TG34222B	IWB12118	2B	186.2		2B	420.02	2B	135.5					A	B	A	A	B	A	A	A	A	A	A	A	A	A	B	A	B	B	B	A	A	B	H	A	A	B	A	A	A	B	B	B	A	A	A	B
BS00026037_51	TG24842B	IWB7606	2B	187.9		2B	437.07	2B	137.8					A	B	A	A	B	A	A	A	A	A	A	A	A	A	B	A	B	B	B	A	A	B	H	A	A	B	A	A	A	B	B	B	A	A	A	B
Excalibur_c47996_509	TG26562B	IWB26914	2B	188.5		2B	437.07							A	B	A	A	B	A	A	A	A	A	A	A	A	A	B	A	B	B	B	A	A	B	A	A	A	B	A	A	A	B	B	B	A	A	A	B
wsnp_Ex_c25043_34305764	TG1025	IWA2946	2B	188.5		2B	455.16	2B	142.7					A	B	A	A	B	A	A	A	A	A	A	A	A	A	B	A	B	B	B	A	A	B	H	A	A	B	A	A	A	B	B	B	A	A	A	B
Excalibur_rep_c105614_172	TG39022A	IWB30139	2B	188.5		2B	450.84	2B	144.2					A	B	A	A	B	A	A	A	A	A	A	A	A	A	B	A	B	B	B	A	A	B	H	A	A	B	A	A	A	B	B	B	A	A	A	B
Ra_c105904_1191	TG06952B	IWB50793	2B	188.5		2B	437.07							A	B	A	A	B	A	A	A	A	A	A	A	A	A	B	A	B	B	B	A	A	B	B	A	A	B	A	A	A	B	B	B	A	A	A	B
RFL_Contig5495_563	TG30412A	IWB65020	2B	188.5		2B	476.87							A	B	A	A	B	A	A	A	A	A	A	A	A	A	B	A	B	B	B	A	A	B	-	A	A	B	A	A	A	B	B	B	A	A	A	B
Kukri_c900_1334	TG4113	IWB48199	2B	188.5		2B	455.16	2B	144.2					A	B	A	A	B	A	A	A	A	A	A	A	A	A	B	A	B	B	B	A	A	B	H	A	A	B	A	A	A	B	B	B	A	A	A	B
Ra_c105904_187	TG41362B	IWB50794	2B	188.5		2B	437.07							A	B	A	A	B	A	A	A	A	A	A	A	A	A	B	A	B	B	B	A	A	B	H	A	A	B	A	A	A	B	B	B	A	A	A	B
RAC875_c19042_2102	TG41712B	IWB54766	2B	188.5		2B	450.84	2B	144.2					A	B	A	A	B	A	A	A	A	A	A	A	A	A	B	A	B	B	B	A	A	B	H	A	A	B	A	A	A	B	B	B	A	A	A	B
wsnp_JD_c30_49073	TG11002A	IWA5989	2B	189		2A	606.42	2A	113.4					A	B	A	A	B	A	A	A	A	A	A	A	A	A	B	A	B	B	B	A	A	B	H	A	A	B	A	A	A	B	B	B	A	A	A	B
BS00083998_51	TG25552B	IWB11333	2B	189		2B	442.78			2B	115.9			A	B	A	A	B	A	A	A	A	A	A	A	A	A	B	A	B	B	B	A	A	B	H	A	A	B	A	A	A	B	B	B	A	A	A	B
BS00094172_51	TG37712A	IWB11856	2B	189		2A	606.42	2A	113.4					A	B	A	A	B	A	A	A	A	A	A	A	A	A	B	A	B	B	B	A	A	B	H	A	A	B	A	A	A	B	B	B	A	A	A	B
Kukri_c498_1817	TG40882A	IWB46025	2B	189		2A	606.42	2A	113.4					A	B	A	A	B	A	A	A	A	A	A	A	A	A	B	A	B	B	B	A	A	B	H	A	A	B	A	A	A	B	B	B	A	A	A	B
wsnp_JD_c30_49876	TG4595	IWA5991	2B	189		2A	606.42	2A	113.4					A	B	A	A	B	A	A	A	A	A	A	A	A	A	B	A	B	B	B	A	A	B	H	A	A	B	A	A	A	B	B	B	A	A	A	B
tplb0042o21_419	TG21552B	IWB74748	2B	189.6		2B	437.53			2B	115.9			A	B	A	A	B	A	A	A	B	A	A	A	A	A	B	A	B	B	B	A	A	B	H	A	A	B	A	A	A	B	B	B	A	A	A	B
BobWhite_c2822_228	TG13722B	IWB2181	2B	190.2		2B	434.09	2B	139.5					A	B	A	A	B	A	A	A	B	A	A	A	A	A	B	A	B	B	B	A	A	B	H	A	A	B	A	A	A	B	B	B	A	A	A	B
Kukri_c9898_328	TG06712B	IWB48533	2B	190.7		2B	442.78							A	B	A	A	B	A	A	A	B	A	A	A	A	A	B	A	B	B	B	A	A	B	H	A	A	B	A	A	A	B	B	B	A	A	A	B
BS00065264_51	TG34072B	IWB9495	2B	190.7		2B	454.19	2B	141.9	2B	120.554			A	B	A	A	B	A	A	A	B	A	A	A	A	A	B	A	B	B	B	A	A	B	H	A	A	B	A	A	A	B	B	B	A	A	A	B
Excalibur_c48871_625	TG26572D	IWB27000	2B	190.7		2B	438.82	2B	139.5	2B	117.937			A	B	A	A	B	A	A	A	B	A	A	A	A	A	B	A	B	B	B	A	A	B	-	A	A	B	A	A	A	B	B	B	A	A	A	B
Excalibur_c7366_1926	TG04772A	IWB28681	2B	190.7		2B	434.63							A	B	A	A	B	A	A	A	B	A	A	A	A	A	B	A	B	B	B	A	A	B	H	A	A	B	A	A	A	B	B	B	A	A	A	B
GENE-0676_649	TG05162D	IWB32030	2B	190.7		2B	434.63							A	B	A	A	B	A	A	A	B	A	A	A	A	A	B	A	B	B	B	A	A	B	B	A	A	B	A	A	A	B	B	B	A	A	A	B
wsnp_Ex_rep_c70525_69448648	TG23252B	IWA5694	2B	190.7		2B	434.63							A	B	A	A	B	A	A	A	B	A	A	A	A	A	B	A	B	B	B	A	A	B	H	A	A	B	A	A	A	B	B	B	A	A	A	B
Kukri_c8494_77	TG00982A	IWB48017	2B	190.7		2B	434.63							A	B	A	A	B	A	A	A	B	A	A	A	A	A	B	A	B	B	B	A	A	B	H	A	A	B	A	A	A	B	B	B	A	A	A	B
Excalibur_c25043_357	TG04372B	IWB24255	2B	190.7		2B	463.73							A	B	A	A	B	A	A	A	B	A	A	A	A	A	B	A	B	B	B	A	A	B	H	A	A	B	A	A	A	B	B	B	A	A	A	B
Excalibur_rep_c106698_235	TG04962B	IWB30221	2B	190.7		2B	434.63							A	B	A	A	B	A	A	A	B	A	A	A	A	A	B	A	B	B	B	A	A	B	A	A	A	B	A	A	A	B	B	B	A	A	A	B
Excalibur_c6937_1065	TG16282B	IWB28533	2B	190.7		2B	455.16							A	B	A	A	B	A	A	A	B	A	A	A	A	A	B	A	B	B	B	A	A	B	H	A	A	B	A	A	A	B	B	B	A	A	A	B
Kukri_c9898_1766	TG18522B	IWB48531	2B	190.7		2B	455.16							A	B	A	A	B	A	A	A	B	A	A	A	A	A	B	A	B	B	B	A	A	B	A	A	A	B	A	A	A	B	B	B	A	A	A	B
Excalibur_c2311_1563	TG26282D	IWB23911	2B	190.7		2B	434.63							A	B	A	A	B	A	A	A	B	A	A	A	A	A	B	A	B	B	B	A	A	B	-	A	A	B	A	A	A	B	B	B	A	A	A	B
Kukri_c9898_1618	TG2874	IWB48530	2B	190.7		2B	442.78							A	B	A	A	B	A	A	A	B	A	A	A	A	A	B	A	B	B	B	A	A	B	H	A	A	B	A	A	-	B	B	B	H	A	A	B
Tdurum_contig30201_63	TG35332A	IWB69974	2B	190.7		2B	434.63							A	B	A	A	B	A	A	A	B	A	A	A	A	A	B	A	B	B	B	A	A	B	H	A	A	B	A	A	A	B	B	B	A	A	A	B
Excalibur_c8919_345	TG04892B	IWB29266	2B	191.9		2B	434.63			2B	117.275			A	B	A	A	B	A	A	A	B	A	A	A	A	A	B	A	B	B	B	A	A	B	-	A	A	B	A	A	A	B	B	B	A	A	A	B
Excalibur_c94383_157	TG26892B	IWB29461	2B	191.9		2B	434.63	2B	135.5	2B	117.275			A	B	A	A	B	A	A	A	B	A	A	A	A	A	B	A	B	B	B	A	A	B	H	A	A	B	A	A	A	B	B	B	A	A	A	B
Kukri_c3501_1175	TG40612B	IWB44399	2B	191.9		2B	434.63			2B	117.275			A	B	A	A	B	A	A	A	B	A	A	A	A	A	B	A	B	B	B	A	A	B	H	A	A	B	A	A	A	B	B	B	A	A	A	B
wsnp_Ex_c15646_23969140	TG31962B	IWA2046	2B	192.4		2B	438.83			2B	117.937	2B	227.057	A	B	A	A	B	A	A	A	B	A	A	A	A	A	B	A	B	B	B	A	A	B	H	A	A	B	A	A	A	B	B	B	A	A	A	B
Excalibur_c48404_59	TG38712B	IWB26954	2B	192.4		2B	442.78			2B	117.937	2B	227.057	A	B	A	A	B	A	A	A	B	A	A	A	A	A	B	A	B	B	B	A	A	B	H	A	A	B	A	A	A	B	B	B	A	A	A	B
Kukri_c19434_936	TG4036	IWB42132	2D	0		2D	35.25	2D	18.6			2D	1.9	A	B	A	B	A	A	A	A	B	B	A	B	B	B	A	B	A	B	A	B	A	A	B	A	B	A	B	A	A	A	A	A	B	B	A	B
wsnp_Ex_c58019_59494143	TG45492D	IWA4354	2D	1.1		2D	35.25					2D	2.3	A	B	A	B	A	A	A	A	B	B	A	B	B	B	A	B	A	B	A	B	A	A	H	A	B	A	B	A	A	A	A	A	B	B	A	B
wsnp_CAP7_c888_455397	TG09882D	IWA1107	2D	1.1		2D	35.08	2D	19.6			2D	3.1	A	B	A	B	A	A	A	A	B	B	A	B	B	B	A	B	A	B	A	B	A	A	H	A	B	A	B	A	A	A	A	A	B	B	A	B
BS00067698_51	TG14852D	IWB10124	2D	1.6		2D	40.87	2D	19.6			2D	3.5	A	B	A	B	A	A	A	A	B	B	A	B	B	B	A	B	A	B	A	B	A	A	H	A	B	A	B	A	A	A	A	A	B	B	A	B
D_contig16084_234	TG00412D	IWB15804	2D	1.6		2D	35.08	2D	19.6			2D	2.7	A	B	A	B	A	A	A	A	B	B	A	B	B	B	A	B	A	B	A	B	A	A	H	A	B	A	B	A	A	A	A	A	B	-	A	B
wsnp_Ex_c7908_13430703	TG1071	IWA4746	2D	1.6		2D	35.25	2D	18.6			2D	1.9	A	B	A	B	A	A	A	A	B	B	A	B	B	B	A	B	A	B	A	B	A	A	-	A	B	A	B	A	A	A	A	A	B	B	A	B
BS00029208_51	TG24862D	IWB7706	2D	1.6		2A	45.51							A	B	A	B	A	A	A	A	B	B	A	B	B	B	A	B	A	B	A	B	A	A	H	A	B	A	B	A	A	A	A	A	B	B	A	B
D_F1BEJMU01A0OMY_356	TG25862D	IWB17276	2D	1.6		2D	35.25	2D	18.6			2D	1.5	A	B	A	B	A	A	A	A	B	B	A	B	B	B	A	B	A	B	A	B	A	A	H	A	B	A	B	A	A	A	A	A	B	B	A	B
RAC875_c25656_289	TG1928	IWB55823	2D	4.4		2D	32.99	2D	21.1					A	B	A	B	A	A	A	A	A	B	A	B	B	B	A	B	A	B	A	B	A	A	A	A	B	A	B	A	A	B	A	A	B	B	A	B
RAC875_c48703_189	TG3504	IWB58466	2D	4.4		2A	0							A	B	A	B	A	A	A	A	A	B	A	B	B	B	A	B	A	B	A	B	A	A	A	A	B	A	B	A	A	B	A	A	B	B	A	B
wsnp_Ra_c25656_35227058	TG35811B	IWA7790	2D	4.4		2D	32.99	2D	21.1					A	B	A	B	A	A	A	A	A	B	A	B	B	B	A	B	A	B	A	B	A	A	A	A	B	A	B	A	A	B	A	A	B	B	A	B
BS00049514_51	TG25042D	IWB8540	2D	6.1		2D	46.27	2D	21.1					A	B	A	B	A	A	A	A	A	B	A	B	B	B	A	B	A	B	A	B	A	A	A	A	B	A	B	A	A	B	A	A	B	B	A	B
Excalibur_rep_c101288_130	TG2694	IWB29707	2D	6.1		2D	42.86	2D	21.1					A	B	A	B	A	A	A	A	A	B	A	B	B	B	A	B	A	B	A	B	A	A	A	A	B	A	B	A	A	B	A	A	B	B	A	B
D_contig39379_541	TG15412D	IWB16781	2D	6.7		2D	46.27							A	B	A	B	A	A	A	A	A	B	A	B	B	B	A	B	A	B	A	B	A	A	A	A	B	A	B	A	A	B	A	A	B	B	A	B
Excalibur_c35611_446	TG26432A	IWB25618	2D	6.7		2D	46.27							A	B	A	B	A	A	A	A	A	B	A	B	B	B	A	B	A	B	A	B	A	A	A	A	B	A	B	A	A	B	A	A	B	B	A	B
Kukri_c29358_277	TG40512A	IWB43695	2D	6.7		2D	46.27							A	B	A	B	A	A	A	A	A	B	A	B	B	B	A	B	A	B	A	B	A	A	A	A	B	A	B	A	A	B	A	A	B	B	A	B
BS00022234_51	TG36751B	IWB6982	2D	7.2		2D	42.63							A	B	A	B	A	A	A	A	A	B	A	B	B	B	A	B	A	B	A	B	A	A	A	A	B	A	B	A	A	B	A	A	B	B	A	B
JD_c63957_1176	TG39962D	IWB37711	2D	10		2D	51.34					2D	9.4	A	B	A	B	A	A	A	A	B	B	A	B	B	B	A	B	A	B	A	B	A	A	H	A	B	A	B	-	A	B	A	A	B	B	A	B
Kukri_rep_c106786_230	TG18582B	IWB49203	2D	10.6		2D	49.29	2D	22.7			2D	9	A	B	A	B	A	A	A	A	B	B	A	B	B	B	A	B	A	B	A	B	A	A	-	A	B	A	B	A	A	B	A	A	B	B	A	B
Kukri_rep_c113120_104	TG18622D	IWB49600	2D	10.6		2D	48.75	2D	22.7			2D	9	A	B	A	B	A	A	A	A	B	B	A	B	B	B	A	B	A	B	A	B	A	A	H	A	B	A	B	A	A	B	A	A	B	B	A	B
wsnp_JD_rep_c63957_40798121	TG33212D	IWA6302	2D	10.6		2D	48.75	2D	22.7			2D	9	A	B	A	B	A	A	A	A	B	B	A	B	B	B	A	B	A	B	A	B	A	A	H	A	B	A	B	A	A	B	A	A	B	B	A	B
Kukri_rep_c114322_506	TG12612D	IWB49647	2D	57.8		2D	113.78							A	B	A	B	B	A	B	B	B	B	A	B	B	B	B	B	A	B	A	A	A	B	H	A	A	B	B	A	B	B	A	B	B	B	B	A
BS00069899_51	TG25342B	IWB10425	2D	57.8		2D	113.7							A	B	A	B	B	A	B	B	B	B	A	B	B	B	B	B	A	B	A	A	A	B	A	A	A	B	B	A	B	B	A	B	B	B	B	A
BS00073229_51	TG25412D	IWB10652	2D	57.8		2D	113.7							A	B	A	B	B	A	B	B	B	B	A	B	B	B	B	B	A	B	A	A	A	B	H	A	A	B	B	A	B	B	A	B	B	B	B	A
BS00039210_51	TG14442D	IWB8161	2D	58.4		2D	117.93							A	B	A	B	B	A	B	B	B	B	A	B	B	B	B	B	A	B	A	A	A	B	H	A	A	B	B	A	B	B	A	B	B	B	B	A
RAC875_rep_c114236_188	TG30042A	IWB62249	2D	58.4		2D	121.96							A	B	A	B	B	A	B	B	B	B	A	B	B	B	B	B	A	B	A	A	A	B	H	A	A	B	B	A	B	B	A	B	B	B	B	A
Excalibur_c22877_1990	TG15782A	IWB23879	2D	59		2D	120.18							A	B	A	B	B	A	B	B	B	B	A	B	B	B	B	B	A	B	A	A	A	B	H	A	A	B	B	A	B	B	A	B	B	B	B	A
RAC875_rep_c108908_72	TG42722A	IWB61830	2D	59		2D	118.56							A	B	A	B	B	A	B	B	B	B	A	B	B	B	B	B	A	B	A	A	A	B	H	A	A	B	B	A	B	B	A	B	B	B	B	A
BS00076261_51	TG11882D	IWB10866	2D	59.5		2D	120.68							A	B	A	B	B	A	B	B	B	B	A	B	B	B	B	B	A	B	A	A	A	B	H	A	A	B	B	A	B	B	A	B	B	B	B	A
Kukri_c63505_174	TG06572D	IWB47073	2D	59.5		2D	118.56							A	B	A	B	B	A	B	B	B	B	A	B	B	B	B	B	A	B	A	A	A	B	H	A	A	B	B	A	B	B	A	B	B	B	B	A
BS00082605_51	TG15022D	IWB11267	2D	59.5		2D	126.97							A	B	A	B	B	A	B	B	B	B	A	B	B	B	B	B	A	B	A	A	A	B	H	A	A	B	B	A	B	B	A	B	B	B	B	A
RAC875_c45702_412	TG19552A	IWB58173	2D	59.5		2D	116.75							A	B	A	B	B	A	B	B	B	B	A	B	B	B	B	B	A	B	A	A	A	B	H	A	A	B	B	A	B	B	A	B	B	B	B	A
IACX1444	TG0570	IWB35753	2D	59.5		2D	119.57							A	B	A	B	B	A	B	B	B	B	A	B	B	B	B	B	A	B	A	A	A	B	H	A	A	B	B	A	B	B	A	B	B	B	B	A
RAC875_c26896_339	TG2935	IWB56002	2D	59.5		2D	125.96							A	B	A	B	B	A	B	B	B	B	A	B	B	B	B	B	A	B	A	A	A	B	H	A	A	B	B	A	B	B	A	B	B	B	B	A
BS00063748_51	TG37282A	IWB9121	2D	59.5		2D	116.75							A	B	A	B	B	A	B	B	B	B	A	B	B	B	B	B	A	B	A	A	A	B	H	A	A	B	B	A	B	B	A	B	B	B	B	A
RAC875_c31493_120	TG01122D	IWB56618	2D	60.1		2D	127.47							A	B	A	B	B	A	B	B	B	B	A	B	B	B	B	B	A	B	A	A	A	B	H	A	A	B	B	A	B	B	A	B	B	B	B	A
wsnp_BE488779D_Ta_1_2	TG31612D	IWA209	2D	60.1		2D	116.75							A	B	A	B	B	A	B	B	B	B	A	B	B	B	B	B	A	B	A	A	A	B	-	A	A	B	B	A	B	B	A	B	B	B	B	A
Excalibur_c3108_2958	TG12102A	IWB25060	2D	60.1		2D	118.56							A	B	A	B	B	A	B	B	B	B	A	B	B	B	B	B	A	B	A	A	A	B	H	A	A	B	B	A	B	B	A	B	B	B	B	A
Kukri_c16557_855	TG00822D	IWB41595	2D	60.1		2D	120.68							A	B	A	B	B	A	B	B	B	B	A	B	B	B	B	B	A	B	A	A	A	B	H	A	A	B	B	A	B	B	A	B	B	B	B	A
IAAV6312	TG12342B	IWB35183	2D	60.1		2D	124.95							A	B	A	B	B	A	B	B	B	B	A	B	B	B	B	B	A	B	A	A	A	B	H	A	A	B	B	A	B	B	A	B	B	B	B	A
BS00010131_51	TG2453	IWB6175	2D	60.1		2D	120.18							A	B	A	B	B	A	B	B	B	B	A	B	B	B	B	B	A	B	A	A	A	B	-	A	A	B	B	A	B	B	A	B	B	B	B	A
BobWhite_c6055_185	TG33742D	IWB4076	2D	60.1		2D	120.18							A	B	A	B	B	A	B	B	B	B	A	B	B	B	B	B	A	B	A	A	A	B	H	A	A	B	B	A	B	B	A	B	B	B	B	A
BobWhite_rep_c51612_864	TG33762D	IWB4966	2D	60.1		2D	114.25							A	B	A	B	B	A	B	B	B	B	A	B	B	B	B	B	A	B	A	A	A	B	H	A	A	B	B	A	B	B	A	B	B	B	B	A
BS00063710_51	TG37272B	IWB9114	2D	60.1		2D	121.96							A	B	A	B	B	A	B	B	B	B	A	B	B	B	B	B	A	B	A	A	A	B	H	A	A	B	B	A	B	B	A	B	B	B	B	A
BS00039211_51	TG14452D	IWB8162	2D	60.6		2D	117.93							A	B	A	B	B	A	B	B	B	B	A	B	B	B	B	B	A	B	A	A	A	B	H	A	A	B	B	A	B	B	A	B	B	B	B	A
BS00063517_51	TG03181B	IWB9072	2D	60.6		2D	121.96	2D	59.1					A	B	A	B	B	A	B	B	B	B	A	B	B	B	B	B	A	B	A	A	A	B	H	A	A	B	B	A	B	B	A	B	B	B	B	A
TA008254-1297	TG0880		2D	60.6										A	B	A	B	B	A	B	B	B	B	A	B	B	B	B	B	A	B	A	A	A	B	-	A	A	B	B	A	B	B	A	B	B	B	B	A
RAC875_rep_c103893_601	TG19872B	IWB61359	2D	60.6		2D	121.68							A	B	A	B	B	A	B	B	B	B	A	B	B	B	B	B	A	B	A	A	A	B	H	A	A	B	B	A	B	B	A	B	B	B	B	A
BobWhite_c47086_539	TG24292B	IWB3556	2D	60.6		2D	113.98							A	B	A	B	B	A	B	B	B	B	A	B	B	B	B	B	A	B	A	A	A	B	H	A	A	B	B	A	B	B	A	B	B	B	B	A
BS00082604_51	TG25512D	IWB11266	2D	60.6		2D	126.97							A	B	A	B	B	A	B	B	B	B	A	B	B	B	B	B	A	B	A	A	A	B	H	A	A	B	B	A	B	B	A	B	B	B	B	A
D_contig77859_59	TG25852D	IWB17205	2D	60.6		2D	127.47							A	B	A	B	B	A	B	B	B	B	A	B	B	B	B	B	A	B	A	A	A	B	H	A	A	B	B	A	B	B	A	B	B	B	B	A
RAC875_c13116_1162	TG29072A	IWB53661	2D	60.6		2D	118.56							A	B	A	B	B	A	B	B	B	B	A	B	B	B	B	B	A	B	A	A	A	B	H	A	A	B	B	A	B	B	A	B	B	B	B	A
RAC875_rep_c72220_143	TG30112D	IWB62848	2D	60.6		2D	126.97	2D	64.5					A	B	A	B	B	A	B	B	B	B	A	B	B	B	B	B	A	B	A	A	A	B	H	A	A	B	B	A	B	B	A	B	B	B	B	A
Kukri_c60627_74	TG3480	IWB46874	2D	60.6		2D	116.93	2D	59.1					A	B	A	B	B	A	B	B	B	B	A	B	B	B	B	B	A	B	A	A	A	B	H	A	A	B	B	A	B	B	A	B	B	B	B	A
Kukri_rep_c71152_906	TG34862B	IWB50095	2D	60.6		2D	122.86	2D	61.4					A	B	A	B	B	A	B	B	B	B	A	B	B	B	B	B	A	B	A	A	A	B	H	A	A	B	B	A	B	B	A	B	B	B	B	A
Excalibur_c17456_428	TG38332D	IWB22968	2D	60.6		2D	118.56							A	B	A	B	B	A	B	B	B	B	A	B	B	B	B	B	A	B	A	A	A	B	H	A	A	B	B	A	B	B	A	B	B	B	B	A
Kukri_rep_c72558_961	TG41302A	IWB50203	2D	60.6		2D	125.96	2D	62.2					A	B	A	B	B	A	B	B	B	B	A	B	B	B	B	B	A	B	A	A	A	B	-	A	A	B	B	A	B	B	A	B	B	B	B	A
BS00044720_51	TG25002D	IWB8375	2D	61.2		2D	124.95							A	B	A	B	B	A	B	B	B	B	A	B	B	B	B	B	A	B	A	A	A	B	H	A	A	B	B	A	B	B	A	B	B	B	B	A
RAC875_c31560_141	TG29432D	IWB56624	2D	61.2		2D	121.18							A	B	A	B	B	A	B	B	B	B	A	B	B	B	B	B	A	B	A	A	A	B	-	A	A	B	B	A	B	B	A	B	B	B	B	A
BS00063225_51	TG37222D	IWB9022	2D	61.2		2D	126.97							A	B	A	B	B	A	B	B	B	B	A	B	B	B	B	B	A	B	A	A	A	B	H	A	A	B	B	A	B	B	A	B	B	B	B	A
BS00065946_51	TG03272A	IWB9680	2D	61.8		2D	134.63							A	B	A	B	B	A	B	B	B	B	A	B	B	B	B	B	A	B	A	A	A	B	H	A	A	B	B	A	B	B	A	B	B	B	B	A
Kukri_rep_c103845_165	TG12602B	IWB48917	2D	61.8		2D	135.44							A	B	A	B	B	A	B	B	B	B	A	B	B	B	B	B	A	B	A	A	A	B	H	A	A	B	B	A	B	B	A	B	B	B	B	A
BS00021718_51	TG14162D	IWB6737	2D	61.8		2D	139.14	2D	69.1					A	B	A	B	B	A	B	B	B	B	A	B	B	B	B	B	A	B	A	A	A	B	H	A	A	B	B	A	B	B	A	B	B	B	B	A
BS00043082_51	TG2498	IWB8330	2D	61.8		2D	138.84							A	B	A	B	B	A	B	B	B	B	A	B	B	B	B	B	A	B	A	A	A	B	H	A	A	B	B	A	B	B	A	B	B	B	B	A
RFL_Contig5917_2433	TG3044	IWB65166	2D	61.8		2D	139.14							A	B	A	B	B	A	B	B	B	B	A	B	B	B	B	B	A	B	A	A	A	B	H	A	A	B	B	A	B	B	A	B	B	B	B	A
BS00080239_51	TG37542D	IWB11119	2D	61.8		2D	138.84							A	B	A	B	B	A	B	B	B	B	A	B	B	B	B	B	A	B	A	A	A	B	H	A	A	B	B	A	B	B	A	B	B	B	B	A
IAAV4282	TG39542D	IWB34858	2D	61.8		2D	134.63							A	B	A	B	B	A	B	B	B	B	A	B	B	B	B	B	A	B	A	A	A	B	H	A	A	B	B	A	B	B	A	B	B	B	B	A
IACX5670	TG39772B	IWB35998	2D	61.8		2D	138.84							A	B	A	B	B	A	B	B	B	B	A	B	B	B	B	B	A	B	A	A	A	B	H	A	A	B	B	A	B	B	A	B	B	B	B	A
wsnp_BE444144D_Ta_1_1	TG4439	IWA144	2D	62.3		2D	137.72							A	B	A	B	B	A	B	B	B	B	A	B	B	B	B	B	A	B	A	A	A	B	H	A	A	B	B	A	B	B	A	B	B	B	B	A
BS00046890_51	TG37072B	IWB8439	2D	62.3		2D	124.9							A	B	A	B	B	A	B	B	B	B	A	B	B	B	B	B	A	B	A	A	A	B	H	A	A	B	B	A	B	B	A	B	B	B	B	A
Kukri_c49670_857	TG06442D	IWB46011	2D	62.3		2D	137.72							A	B	A	B	B	A	B	B	B	B	A	B	B	B	B	B	A	B	A	A	A	B	H	A	A	B	B	A	B	B	A	B	B	B	B	A
RAC875_c46007_340	TG07802D	IWB58201	2D	62.3		2D	134.63							A	B	A	B	B	A	B	B	B	B	A	B	B	B	B	B	A	B	A	A	A	B	H	A	A	B	B	A	B	B	A	B	B	B	B	A
RAC875_c60563_531	TG08042A	IWB59535	2D	62.3		2D	135.44							A	B	A	B	B	A	B	B	B	B	A	B	B	B	B	B	A	B	A	A	A	B	H	A	A	B	B	A	B	B	A	B	B	B	B	A
BS00083504_51	TG1504	IWB11304	2D	62.3		2D	135.27							A	B	A	B	B	A	B	B	B	B	A	B	B	B	B	B	A	B	A	A	A	B	H	A	A	B	B	A	B	B	A	B	B	B	B	A
CAP11_c3942_361	TG15292D	IWB12871	2D	62.3		2D	135.44							A	B	A	B	B	A	B	B	B	B	A	B	B	B	B	B	A	B	A	A	A	B	H	A	A	B	B	A	B	B	A	B	B	B	B	A
Kukri_c26576_329	TG28252D	IWB43312	2D	62.3		2D	135.44							A	B	A	B	B	A	B	B	B	B	A	B	B	B	B	B	A	B	A	A	A	B	-	A	A	B	B	A	B	B	A	B	B	B	B	A
RFL_Contig5917_3026	TG3045	IWB65167	2D	62.3		2D	139.51							A	B	A	B	B	A	B	B	B	B	A	B	B	B	B	B	A	B	A	A	A	B	H	A	A	B	B	A	B	B	A	B	B	B	B	A
TA001366-0072	TG3049	IWB65385	2D	62.3		2D	137.72							A	B	A	B	B	A	B	B	B	B	A	B	B	B	B	B	A	B	A	A	A	B	-	A	A	B	B	A	B	B	A	B	B	B	B	A
D_contig25212_98	TG38072A	IWB16217	2D	62.3		2B	177.38			2B	0			A	B	A	B	B	A	B	B	B	B	A	B	B	B	B	B	A	B	A	A	A	B	H	A	A	B	B	A	B	B	A	B	B	B	B	A
RAC875_rep_c73201_205	TG42822A	IWB62940	2D	62.3		2D	135.44							A	B	A	B	B	A	B	B	B	B	A	B	B	B	B	B	A	B	A	A	A	B	H	A	A	B	B	A	B	B	A	B	B	B	B	A
Kukri_c14902_1112	TG06172A	IWB41295	2D	63.4		2D	151.06	2D	74					A	B	A	B	B	A	B	B	B	B	A	B	B	B	B	B	A	B	A	A	A	B	A	A	A	B	B	A	B	B	A	B	B	B	B	A
Kukri_rep_c110868_147	TG18612D	IWB49478	2D	64		2D	142.43							A	B	A	B	B	A	B	B	A	B	A	B	B	B	B	B	A	B	A	A	A	B	A	A	A	B	B	A	B	B	A	B	B	B	B	A
wsnp_Ku_c14251_22503965	TG23462D	IWA6520	2D	64		2D	141.68							A	B	A	B	B	A	B	B	A	B	A	B	B	B	B	B	A	B	A	A	A	B	A	A	A	B	B	A	B	B	A	B	B	B	B	A
IAAV8184	TG47582D	IWB35441	2D	64		2D	142.43							A	B	A	B	B	A	B	B	A	B	A	B	B	B	B	B	A	B	A	A	A	B	A	A	A	B	B	A	B	B	A	B	B	B	B	A
Kukri_rep_c69087_153	TG1865	IWB49853	2D	64.6		2D	158.89							A	B	A	B	B	A	B	B	A	B	A	B	B	B	B	B	A	B	A	A	A	B	A	A	A	B	B	A	B	B	A	B	B	B	B	A
GENE-0687_448	TG27082D	IWB32050	2D	65.1		2D	160.44							A	B	A	B	B	A	B	B	A	B	A	B	B	B	B	B	A	B	A	A	A	B	A	A	A	B	B	A	B	B	A	B	B	B	B	A
Kukri_c5579_466	TG28582A	IWB46550	2D	65.1		2D	158.4							A	B	A	B	B	A	B	B	A	B	A	B	B	B	B	B	A	B	A	A	A	B	A	A	A	B	B	A	B	B	A	B	B	B	B	A
D_GA8KES401AVZF3_380	TG04082D	IWB17710	2D	65.7		2D	158.4							A	B	A	B	B	A	B	B	A	B	A	B	B	B	B	B	A	B	A	A	A	B	A	A	A	B	B	A	B	B	A	B	B	B	B	A
GENE-0875_620	TG16542B	IWB32130	2D	65.7		2D	160.44							A	B	A	B	B	A	B	B	A	B	A	B	B	B	B	B	A	B	A	A	A	B	A	A	A	B	B	A	B	B	A	B	B	B	B	A
wsnp_Ra_rep_c116793_96612614	TG11532B	IWA8151	2D	66.8		2D	152.05	2D	74					A	B	A	B	B	A	B	B	B	B	A	B	B	B	B	B	A	B	A	A	A	B	-	A	A	B	B	A	B	B	A	B	B	B	B	A
BS00011109_51	TG24572A	IWB6349	2D	67.3		2D	169.26							A	B	A	B	B	A	B	B	B	B	A	B	B	B	B	B	A	B	A	A	A	B	H	A	A	B	B	A	B	B	B	B	B	B	B	A
Excalibur_c24307_739	TG0436	IWB24133	2D	68.5		2D	205.95	2D	92.1					A	B	A	B	B	A	B	B	B	B	A	B	B	B	B	B	A	B	A	A	A	B	H	A	A	B	B	A	B	B	B	B	B	B	B	A
Excalibur_c44325_339	TG12112D	IWB26538	2D	91.1		2D	257.36							A	B	A	B	A	A	B	B	B	B	A	B	B	B	A	B	A	B	A	A	A	B	H	A	A	B	A	A	B	B	A	A	B	B	B	A
Kukri_c31121_1460	TG17962D	IWB43945	2D	91.1		2D	257.29							A	B	A	B	A	A	B	B	B	B	A	B	B	B	A	B	A	B	A	A	A	B	H	A	A	B	A	A	B	B	A	A	B	B	B	A
BobWhite_c6365_965	TG36382B	IWB4157	2D	91.7		2D	252.41					2D	145.3	A	B	A	B	A	A	B	B	B	B	A	B	B	B	A	B	A	B	A	A	A	B	B	A	A	B	A	A	B	B	A	A	B	B	B	A
RAC875_c78404_242	TG0119	IWB60517	2D	91.7		2D	235.99	2D	117.7					A	B	A	B	A	A	B	B	B	B	A	B	B	B	A	B	A	B	A	A	A	B	B	A	A	B	A	A	B	B	A	A	B	B	B	A
tplb0021c10_951	TG44262D	IWB74084	2D	91.7		2B	183.74	2D	117.7			2B	93.1208	A	B	A	B	A	A	B	B	B	B	A	B	B	B	A	B	A	B	A	A	A	B	B	A	A	B	A	A	B	B	A	A	B	B	B	A
RAC875_c3187_873	TG19382D	IWB56662	2D	136.6		2D	307.99	2D	136.4					A	B	A	B	A	A	B	A	B	B	A	B	B	B	A	A	A	B	A	A	A	B	B	B	A	A	A	B	A	A	B	A	B	B	B	A
IAAV6032	TG05562D	IWB35134	2D	137.1		2D	318.33	2D	136.4					A	B	A	B	A	A	B	A	B	B	A	B	B	B	A	A	A	B	A	A	A	B	B	B	A	A	A	B	A	A	B	A	B	B	B	A
BS00015680_51	TG14132D	IWB6623	2D	137.1		2D	326.12							A	B	A	B	A	A	B	A	B	B	A	B	B	B	A	A	A	B	A	A	A	B	B	B	A	A	A	B	A	A	B	A	B	B	B	A
Excalibur_rep_c67599_242	TG39072D	IWB30880	2D	137.1		2D	325.58	2D	136.4					A	B	A	B	A	A	B	A	B	B	A	B	B	B	A	A	A	B	A	A	A	B	B	B	A	A	A	B	A	A	B	A	B	B	B	A
Excalibur_rep_c67599_2154	TG47372D	IWB30879	2D	137.1		2D	316.87	2D	136.4					A	B	A	B	A	A	B	A	B	B	A	B	B	B	A	A	A	B	A	A	A	B	B	B	A	A	A	B	A	A	B	A	B	B	B	A
CAP7_c1467_220	TG03983A	IWB13817	3A	0		3A	13.6					3A	26.7	A	B	A	B	B	A	B	A	B	B	A	B	A	B	B	A	B	B	A	A	A	A	H	A	B	A	A	A	A	B	A	A	B	A	A	B
RAC875_c67770_822	TG01173A	IWB60124	3A	2.9		3A	34.96					3A	29.63	A	B	A	B	B	A	B	A	B	B	A	B	A	B	B	A	B	B	A	A	A	A	H	A	B	A	A	A	A	B	A	A	B	A	A	B
BS00081981_51	TG37583D	IWB11224	3A	4		3A	34.96							A	B	A	B	B	A	B	A	B	B	A	B	A	B	B	A	B	B	A	A	A	A	B	A	B	A	A	A	A	B	A	A	B	A	A	B
Excalibur_c1529_1644	TG15653A	IWB22596	3A	5.1		3A	33.45							A	B	A	B	H	A	B	A	A	B	A	B	A	B	B	A	B	B	A	A	A	A	H	A	B	A	A	A	A	B	A	A	B	A	A	B
Kukri_c28650_111	TG34703A	IWB43584	3A	5.1		3A	34.96							A	B	A	B	B	A	B	A	A	B	A	B	A	B	B	A	B	B	A	A	A	A	B	A	B	A	A	A	A	B	A	A	B	A	A	B
wsnp_Ex_rep_c67635_66292308	TG10862A	IWA5429	3A	6.3		3A	42.04	3A	3.2					A	B	A	B	-	A	B	A	A	B	A	B	A	B	B	A	B	B	A	A	A	A	H	A	B	A	A	A	A	B	A	A	B	A	A	B
BS00066230_51	TG25273A	IWB9752	3A	6.3		3A	43.59	3A	3.2					A	B	A	B	B	A	B	A	A	B	A	B	A	B	B	A	B	B	A	A	A	A	H	A	B	A	A	A	A	B	A	A	B	A	A	B
Excalibur_c12875_864	TG26103A	IWB22164	3A	6.3		3A	42.04	3A	3.2					A	B	A	B	H	A	B	A	A	B	A	B	A	B	B	A	B	B	A	A	A	A	H	A	B	A	A	A	A	B	A	A	B	A	A	B
Excalibur_c60530_113	TG1215	IWB27973	3A	6.3		3A	61.63	3A	3.2			3A	32.72	A	B	A	B	B	A	B	A	B	B	A	B	A	B	B	A	B	B	A	A	A	A	A	A	B	A	A	A	A	B	A	A	B	A	A	B
RAC875_c36922_829	TG19483A	IWB57220	3A	6.8		3A	55.08							A	B	A	B	H	A	B	A	A	B	A	B	A	B	B	A	B	B	A	A	A	A	H	A	B	A	A	A	A	B	A	A	B	A	A	B
RFL_Contig1488_671	TG20033A	IWB63656	3A	6.8		3A	33.45							A	B	A	B	B	A	B	A	A	B	A	B	A	B	B	A	B	B	A	A	A	A	-	A	B	A	A	A	A	B	A	A	B	A	A	B
Kukri_rep_c69028_1398	TG06853A	IWB49840	3A	7.4		3A	42.04	3A	3.2					A	B	A	B	-	A	B	A	A	B	A	B	A	B	B	A	B	B	A	A	A	A	H	A	B	A	A	A	A	B	A	A	B	A	A	B
RAC875_c82493_67	TG19803A	IWB60693	3A	14.8		3A	69.15	3A	5.8					A	B	A	B	H	A	B	A	A	B	A	B	A	B	B	A	B	B	A	A	A	A	H	A	B	A	A	B	A	B	A	A	B	A	A	B
Excalibur_c62042_175	TG34443D	IWB28092	3A	14.8		3A	79.21	3A	5.8					A	B	A	B	H	A	B	A	A	B	A	B	B	B	B	A	B	B	A	A	A	A	H	A	B	A	A	B	A	B	A	A	B	A	B	B
TA002103-1262	TG3518	IWB65500	3A	17.6		3A	79.71							A	B	A	B	B	A	B	A	B	B	A	B	A	B	B	A	B	B	A	A	A	A	B	A	B	A	A	B	A	B	A	A	B	A	A	B
Jagger_c8039_67	TG39913A	IWB36767	3A	17.6		3A	79.71							A	B	A	B	B	A	B	A	B	B	A	B	A	B	B	A	B	B	A	A	A	A	B	A	B	A	A	B	A	B	A	A	B	A	A	B
Ra_c6118_350	TG07083A	IWB52332	3A	29.6		3A	85.31	3A	8.9			3A	41.91	A	B	A	B	B	A	B	B	B	B	A	A	B	B	B	A	B	B	A	A	A	A	H	A	B	A	A	B	A	B	A	A	B	A	B	A
Kukri_c49280_230	TG06433A	IWB45971	3A	33		3A	94.43							A	B	A	B	B	B	B	B	A	B	A	A	B	B	B	A	B	B	A	A	A	A	H	A	B	A	A	B	B	B	A	A	A	A	B	A
wsnp_CAP11_rep_c4157_1965583	TG21903A	IWA851	3A	33		3A	93.22							A	B	A	B	B	B	B	B	A	B	A	A	B	B	B	A	B	B	A	A	A	A	A	A	B	A	A	B	B	B	A	A	A	A	B	A
Kukri_c17099_871	TG40313A	IWB41712	3A	33.6		3A	94.38							A	B	A	B	B	B	B	B	A	B	A	A	B	B	B	A	B	B	A	A	A	A	H	A	B	A	A	B	B	B	A	A	A	A	B	A
wsnp_Ra_rep_c106523_90273922	TG48693A	IWA8127	3A	33.6		3A	92.82							A	B	A	B	B	B	B	B	A	B	A	A	B	B	B	A	B	B	A	A	A	A	H	A	B	A	A	B	B	B	A	A	A	A	B	A
wsnp_JD_c2722_3653988	TG45933A	IWA5969	3A	38.1		3A	97.72	3A	12					A	B	A	B	H	B	B	B	B	B	A	A	B	B	B	A	B	B	A	A	A	A	B	B	B	A	A	B	A	A	A	A	A	A	B	A
Tdurum_contig52302_649	TG4814	IWB72256	3A	38.1		3A	97.72	3A	12					A	B	A	B	B	B	B	B	B	B	A	A	B	B	B	A	B	B	A	A	A	A	B	B	B	A	A	B	A	A	A	A	A	A	B	A
wsnp_Ex_c4548_8166555	TG22753A	IWA3939	3A	42		3A	100.32	3A	17.4			3A	56.04	A	B	A	B	H	B	B	B	A	B	A	A	B	B	B	A	B	A	A	A	A	A	B	B	B	A	A	B	A	A	A	A	A	A	B	A
wsnp_Ra_c9738_16174002	TG23943A	IWA8106	3A	42		3A	100.32	3A	17.4			3A	56.04	A	B	A	B	H	B	B	B	A	B	A	A	B	B	B	A	B	A	A	A	A	A	B	B	B	A	A	B	A	A	A	A	A	A	B	A
Excalibur_c4548_2505	TG26533A	IWB26667	3A	42		3A	100.32	3A	17.4			3A	56.04	A	B	A	B	H	B	B	B	A	B	A	A	B	B	B	A	B	A	A	A	A	A	B	B	B	A	A	B	A	A	A	A	A	A	B	A
Excalibur_c4548_2697	TG47303A	IWB26668	3A	42.6		3A	100.32	3A	17.4					A	B	A	B	B	B	B	B	A	B	A	A	B	B	B	A	B	A	A	A	A	A	B	B	B	A	A	B	A	A	A	A	A	A	B	A
BS00049032_51	TG37113A	IWB8523	3A	44.9		3A	109.81	3A	19.7					A	B	A	B	B	B	B	B	A	B	A	A	B	B	B	A	B	A	A	A	A	A	B	B	B	A	A	B	A	A	A	A	A	A	B	A
wsnp_Ex_c8240_13914674	TG45603B	IWA4781	3A	44.9		3A	109.9	3A	19.7			3A	58.25	A	B	A	B	B	B	B	B	A	B	A	A	B	B	B	A	B	A	A	A	A	A	H	B	B	A	A	B	A	A	A	A	A	A	B	A
BS00065956_51	TG03283A	IWB9681	3A	58.1		3A	130.16	3A	32.1			3A	76.45	A	B	A	B	B	B	A	B	A	B	A	A	B	B	B	A	B	A	B	A	B	A	B	B	B	A	B	B	A	A	A	A	A	B	B	A
BS00048757_51	TG11783A	IWB8516	3A	58.1		3A	130.27	3A	32.1					A	B	A	B	B	B	A	B	A	B	A	A	B	B	B	A	B	A	B	A	B	A	-	B	B	A	B	B	A	A	A	A	A	B	B	A
Excalibur_c25239_283	TG26323A	IWB24284	3A	58.1		3A	130.84	3A	32.1					A	B	A	B	H	B	A	B	A	B	A	A	B	B	B	A	B	A	B	A	B	A	H	B	B	A	B	B	A	A	A	A	A	B	B	A
BS00025191_51	TG46863A	IWB7571	3A	58.7		3A	122.8	3A	31.3					A	B	A	B	B	B	A	B	A	B	A	A	B	B	B	A	B	A	B	A	B	A	H	B	B	A	B	B	A	A	A	A	A	B	B	A
wsnp_Ex_c15674_24005648	TG1013	IWA2049	3A	60.3		3A	125.18							A	B	A	B	B	B	A	B	B	B	A	A	B	B	B	A	B	A	B	A	B	A	B	B	B	A	B	B	A	A	A	A	A	B	B	A
wsnp_Ex_c15674_24004513	TG4477	IWA2047	3A	60.9		3A	124.97							A	B	A	B	B	B	A	B	B	B	A	A	B	B	B	A	B	A	B	A	B	A	B	B	B	A	B	B	A	A	A	A	A	B	B	A
wsnp_Ku_c4568_8243775	TG46283A	IWA7086	3A	60.9		3A	124.97							A	B	A	B	-	B	A	B	B	B	A	A	B	B	B	A	B	A	B	A	B	A	B	B	B	A	B	B	A	A	A	A	A	B	B	A
Tdurum_contig91865_242	TG21323A	IWB73771	3A	69.9		3A	145.87	3A	38.3	3A	1.96179			A	B	A	B	B	B	A	B	B	B	A	A	B	B	A	A	A	A	B	A	B	B	H	B	B	A	B	B	A	A	A	A	A	B	B	A
RAC875_c19534_68	TG07383A	IWB54849	3A	70.5		4A	132.1					4A	230.2	A	B	A	B	B	B	B	B	B	B	A	A	B	B	A	A	A	A	B	A	B	B	A	B	B	A	B	B	A	A	A	A	A	B	B	A
Tdurum_contig86206_149	TG13103A	IWB73711	3A	74.4		3A	161.31	3A	44.7					A	B	A	B	B	B	B	B	A	B	A	A	B	B	A	B	A	A	B	A	B	B	A	B	B	A	B	B	A	A	A	A	A	B	B	A
BS00032524_51	TG14373A	IWB7895	3A	74.4		3A	160.94	3A	44.7	3A	3.2866			A	B	A	B	-	B	B	B	A	B	A	A	B	B	A	B	A	A	B	A	B	B	A	B	B	A	B	B	A	A	A	A	A	B	B	A
Excalibur_c10079_1585	TG15563A	IWB21527	3A	74.4		3A	160.94	3A	44.7					A	B	A	B	H	B	B	B	A	B	A	A	B	B	A	B	A	A	B	A	B	B	A	B	B	A	B	B	A	A	A	A	A	B	B	A
IAAV2646	TG16844D	IWB34591	3A	74.4		3A	160.94	3A	44.7					A	B	A	B	B	B	B	B	A	B	A	A	B	B	A	B	A	A	B	A	B	B	A	B	B	A	B	B	A	A	A	A	A	B	B	A
BS00007502_51	TG2451	IWB6013	3A	74.4		3A	155.53	3A	44.7	3A	3.2866			A	B	A	B	-	B	B	B	A	B	A	A	B	B	A	B	A	A	B	A	B	B	A	B	B	A	B	B	A	A	A	A	A	B	B	A
BS00065468_51	TG25233A	IWB9559	3A	74.4		3A	158.04	3A	44.7	3A	3.2866			A	B	A	B	B	B	B	B	A	B	A	A	B	B	A	B	A	A	B	A	B	B	A	B	B	A	B	B	A	A	A	A	A	B	B	A
RAC875_c2464_274	TG29293A	IWB55686	3A	74.4		3A	160.94	3A	44.7	3A	3.2866			A	B	A	B	H	B	B	B	A	B	A	A	B	B	A	B	A	A	B	A	B	B	A	B	B	A	B	B	A	A	A	A	A	B	B	A
BS00094366_51	TG37733A	IWB11867	3A	74.4		3A	156.53	3A	44.7					A	B	A	B	B	B	B	B	A	B	A	A	B	B	A	B	A	A	B	A	B	B	A	B	B	A	B	B	A	A	A	A	A	B	B	A
wsnp_Ex_rep_c102478_87635370	TG0180	IWA5067	3A	76.6		3A	166.28	3A	48.6					A	B	A	B	H	B	B	B	A	B	A	A	B	B	A	B	A	A	B	A	B	B	A	B	B	A	B	B	A	A	A	A	A	B	B	A
BS00073854_51	TG14903A	IWB10693	3A	77.8		3A	195.56							A	B	A	B	B	B	B	B	B	B	A	A	B	B	A	B	A	A	B	A	B	B	A	B	B	A	B	B	A	A	A	A	A	B	B	A
Excalibur_c2578_1966	TG15833A	IWB24367	3A	78.3		3A	176.76							A	B	A	B	H	B	B	B	B	B	A	A	B	B	A	B	A	A	B	A	B	B	H	B	B	A	B	B	A	A	A	A	A	B	B	A
BS00022129_51	TG02713A	IWB6920	3A	78.9		3A	200.92	3A	56.8					A	B	A	B	B	B	B	B	B	B	A	A	B	B	A	B	A	A	B	A	B	B	H	B	B	A	B	B	A	A	A	A	A	B	B	A
IAAV4781	TG16923A	IWB34922	3A	78.9		3A	176.44	3A	53.3					A	B	A	B	B	B	B	B	B	B	A	A	B	B	A	B	A	A	B	A	B	B	H	B	B	A	B	B	A	A	A	A	A	B	B	A
wsnp_Ex_c1141_2191485	TG31843A	IWA1490	3A	78.9		3A	176.1	3A	52.5					A	B	A	B	B	B	B	B	B	B	A	A	B	B	A	B	A	A	B	A	B	B	H	B	B	A	B	B	A	A	A	A	A	B	B	A
Kukri_c28165_906	TG28282A	IWB43537	3A	80		3A	169.95							A	B	A	B	H	B	B	B	A	B	A	A	B	B	A	B	A	A	B	A	B	B	A	B	B	A	B	B	A	A	A	A	A	B	B	A
RAC875_rep_c109288_122	TG19943A	IWB61873	3A	80.6		3A	173.89							A	B	A	B	H	B	B	B	A	B	A	A	B	B	A	B	A	A	B	A	B	B	A	B	B	A	B	B	A	A	A	A	A	B	B	A
wsnp_Ku_c40218_48484410	TG23653A	IWA7022	3A	80.6		3A	170.53	3A	51					A	B	A	B	H	B	B	B	A	B	A	A	B	B	A	B	A	A	B	A	B	B	A	B	B	A	B	B	A	A	A	A	A	B	B	A
Excalibur_rep_c103091_266	TG3900	IWB29898	3A	80.6		3A	174.9	3A	51.8					A	B	A	B	H	B	B	B	A	B	A	A	B	B	A	B	A	A	B	A	B	B	A	B	B	A	B	B	A	A	A	A	A	B	B	A
wsnp_Ra_c16278_24893033	TG4642	IWA7649	3A	80.6		3A	170.25	3A	51					A	B	A	B	H	B	B	B	A	B	A	A	B	B	A	B	A	A	B	A	B	B	A	B	B	A	B	B	A	A	A	A	A	B	B	A
IAAV4343	TG27393A	IWB34863	3A	81.1		3A	201.69							A	B	A	B	H	B	B	B	A	B	A	A	B	B	A	B	A	A	B	A	B	B	A	B	B	A	B	B	A	A	A	A	A	B	B	A
BobWhite_c42102_237	TG0227	IWB3210	3A	81.7		3A	229.86							A	B	A	B	B	B	B	B	A	B	A	A	B	B	A	B	A	A	B	A	B	B	A	B	B	A	B	B	A	A	A	A	A	B	B	A
Excalibur_c13709_2568	TG0421	IWB22310	3A	81.7		3A	236.56	3A	60.6					A	B	A	B	H	B	B	B	A	B	A	A	B	B	A	B	A	A	B	A	B	B	A	B	B	A	B	B	A	A	A	A	A	B	B	A
Kukri_c82097_197	TG06633A	IWB47905	3A	81.7		3A	245.62	3A	60.6					A	B	A	B	B	B	B	B	A	B	A	A	B	B	A	B	A	A	B	A	B	B	A	B	B	A	B	B	A	A	A	A	A	B	B	A
RAC875_rep_c75768_245	TG08423A	IWB63064	3A	81.7		3A	254.28							A	B	A	B	B	B	B	B	A	B	A	A	B	B	A	B	A	A	B	A	B	B	A	B	B	A	B	B	A	A	A	A	A	B	B	A
wsnp_Ex_c22766_31972812	TG1022	IWA2751	3A	81.7		3A	230.16							A	B	A	B	-	B	B	B	A	B	A	A	B	B	A	B	A	A	B	A	B	B	A	B	B	A	B	B	A	A	A	A	A	B	B	A
TA002217-0946	TG2031	IWB65513	3A	81.7		3A	227.96							A	B	A	B	H	B	B	B	A	B	A	A	B	B	A	B	A	A	B	A	B	B	A	B	B	A	B	B	A	A	A	A	A	B	B	A
Tdurum_contig33100_127	TG20733A	IWB70411	3A	81.7		3A	291.47	3A	60.6					A	B	A	B	-	B	B	B	A	B	A	A	B	B	A	B	A	A	B	A	B	B	A	B	B	A	B	B	A	A	A	A	A	B	B	A
Tdurum_contig59782_86	TG21143A	IWB72687	3A	81.7		3A	229.86							A	B	A	B	B	B	B	B	A	B	A	A	B	B	A	B	A	A	B	A	B	B	A	B	B	A	B	B	A	A	A	A	A	B	B	A
IACX6092	TG2775	IWB36111	3A	81.7		3A	250.77							A	B	A	B	B	B	B	B	A	B	A	A	B	B	A	B	A	A	B	A	B	B	A	B	B	A	B	B	A	A	A	A	A	B	B	A
wsnp_Ra_c7280_12576178	TG33593A	IWA8061	3A	81.7		3A	230.16							A	B	A	B	H	B	B	B	A	B	A	A	B	B	A	B	A	A	B	A	B	B	A	B	B	A	B	B	A	A	A	A	A	B	B	A
Ra_c5515_1723	TG41483A	IWB52255	3A	81.7		3A	254.79							A	B	A	B	H	B	B	B	A	B	A	A	B	B	A	B	A	A	B	A	B	B	A	B	B	A	B	B	A	A	A	A	A	B	B	A
RFL_Contig1175_354	TG4295	IWB63579	3A	81.7		3A	245.19	3A	60.6					A	B	A	B	-	B	B	B	A	B	A	A	B	B	A	B	A	A	B	A	B	B	A	B	B	A	B	B	A	A	A	A	A	B	B	A
Ku_c19285_555	TG05923A	IWB38690	3A	81.7		3A	291.47	3A	60.6					A	B	A	B	-	B	B	B	A	B	A	A	B	B	A	B	A	A	B	A	B	B	A	B	B	A	B	B	A	A	A	A	A	B	B	A
IAAV488	TG05503A	IWB34943	3A	82.2		3A	213.13							A	B	A	B	B	B	B	B	A	B	A	A	B	B	A	B	A	A	B	A	B	B	A	B	B	A	B	B	A	A	A	A	A	B	B	A
tplb0050h15_1287	TG21603A	IWB74968	3A	82.2		3A	247.12							A	B	A	B	B	B	B	B	A	B	A	A	B	B	A	B	A	A	B	A	B	B	A	B	B	A	B	B	A	A	A	A	A	B	B	A
Ra_c5515_2396	TG28973A	IWB52256	3A	82.2		3A	253.78							A	B	A	B	B	B	B	B	A	B	A	A	B	B	A	B	A	A	B	A	B	B	A	B	B	A	B	B	A	A	A	A	A	B	B	A
BS00110266_51	TG47113A	IWB12501	3A	82.2		3A	246.12							A	B	A	B	B	B	B	B	A	B	A	A	B	B	A	B	A	A	B	A	B	B	A	B	B	A	B	B	A	A	A	A	A	B	B	A
D_contig22919_290	TG2584	IWB16116	3A	82.8		3A	253.28							A	B	A	B	-	B	B	B	A	B	A	A	B	B	A	B	A	A	B	A	B	B	A	B	B	A	B	B	A	A	A	A	A	B	B	A
Excalibur_c91154_175	TG00573A	IWB29336	3A	82.8		3A	213.13	3A	59					A	B	A	B	B	B	B	B	A	B	A	A	B	B	A	B	A	A	B	A	B	B	A	B	B	A	B	B	A	A	A	A	A	B	B	A
Ra_c11263_2353	TG06973A	IWB50912	3A	82.8		3A	251.27	3A	60.6					A	B	A	B	-	B	B	B	A	B	A	A	B	B	A	B	A	A	B	A	B	B	A	B	B	A	B	B	A	A	A	A	A	B	B	A
Ra_c88203_1055	TG0714	IWB52767	3A	82.8		3A	249.26	3A	60.6					A	B	A	B	H	B	B	B	A	B	A	A	B	B	A	B	A	A	B	A	B	B	A	B	B	A	B	B	A	A	A	A	A	B	B	A
Tdurum_contig63129_238	TG09353A	IWB72935	3A	82.8		3A	249.26	3A	60.6					A	B	A	B	B	B	B	B	A	B	A	A	B	B	A	B	A	A	B	A	B	B	A	B	B	A	B	B	A	A	A	A	A	B	B	A
wsnp_BE443568A_Ta_2_1	TG21703A	IWA132	3A	82.8		3A	230.4	3A	60.6					A	B	A	B	B	B	B	B	A	B	A	A	B	B	A	B	A	A	B	A	B	B	A	B	B	A	B	B	A	A	A	A	A	B	B	A
BobWhite_c30232_154	TG24213A	IWB2350	3A	82.8		3A	230.4	3A	60.6					A	B	A	B	-	B	B	B	A	B	A	A	B	B	A	B	A	A	B	A	B	B	A	B	B	A	B	B	A	A	A	A	A	B	B	A
BobWhite_s65081_93	TG2442	IWB5680	3A	82.8		3A	249.13	3A	60.6					A	B	A	B	B	B	B	B	A	B	A	A	B	B	A	B	A	A	B	A	B	B	A	B	B	A	B	B	A	A	A	A	A	B	B	A
Excalibur_c13242_1178	TG26143A	IWB22237	3A	82.8		3A	213.13	3A	60.6					A	B	A	B	B	B	B	B	A	B	A	A	B	B	A	B	A	A	B	A	B	B	A	B	B	A	B	B	A	A	A	A	A	B	B	A
Tdurum_contig57693_581	TG3118	IWB72591	3A	82.8		3A	248.63	3A	60.6					A	B	A	B	B	B	B	B	A	B	A	A	B	B	A	B	A	A	B	A	B	B	A	B	B	A	B	B	A	A	A	A	A	B	B	A
Tdurum_contig68855_91	TG31293A	IWB73130	3A	82.8		3A	249.13	3A	60.6					A	B	A	B	B	B	B	B	A	B	A	A	B	B	A	B	A	A	B	A	B	B	A	B	B	A	B	B	A	A	A	A	A	B	B	A
wsnp_JD_c5699_6859527	TG33133B	IWA6108	3A	82.8		3A	249.25	3A	60.6					A	B	A	B	B	B	B	B	A	B	A	A	B	B	A	B	A	A	B	A	B	B	A	B	B	A	B	B	A	A	A	A	A	B	B	A
wsnp_RFL_Contig2011_1216801	TG33643B	IWA8283	3A	82.8		3A	249.25	3A	60.6					A	B	A	B	B	B	B	B	A	B	A	A	B	B	A	B	A	A	B	A	B	B	A	B	B	A	B	B	A	A	A	A	A	B	B	A
BS00022882_51	TG36823A	IWB7305	3A	82.8		3A	230.4	3A	60.6					A	B	A	B	B	B	B	B	A	B	A	A	B	B	A	B	A	A	B	A	B	B	A	B	B	A	B	B	A	A	A	A	A	B	B	A
Ra_c88203_455	TG41513A	IWB52768	3A	82.8		3A	250.26	3A	60.6					A	B	A	B	H	B	B	B	A	B	A	A	B	B	A	B	A	A	B	A	B	B	A	B	B	A	B	B	A	A	A	A	A	B	B	A
Ra_c88203_468	TG41523A	IWB52769	3A	82.8		3A	249.26	3A	60.6					A	B	A	B	H	B	B	B	A	B	A	A	B	B	A	B	A	A	B	A	B	B	A	B	B	A	B	B	A	A	A	A	A	B	B	A
RAC875_c19570_671	TG41743A	IWB54860	3A	82.8		3A	213.13	3A	60.6					A	B	A	B	B	B	B	B	A	B	A	A	B	B	A	B	A	A	B	A	B	B	A	B	B	A	B	B	A	A	A	A	A	B	B	A
Ku_c17569_905	TG05913A	IWB38609	3A	83.4		3A	207.65	3A	60.6					A	B	A	B	B	B	B	B	A	B	A	A	B	B	A	B	A	A	B	A	B	B	H	B	B	A	B	B	A	A	A	A	A	B	B	A
wsnp_Ex_rep_c101340_86719239	TG23063A	IWA5006	3A	83.4		3A	206.34	3A	60.6					A	B	A	B	B	B	B	B	A	B	A	A	B	B	A	B	A	A	B	A	B	B	H	B	B	A	B	B	A	A	A	A	A	B	B	A
JD_c1187_1398	TG39923A	IWB36921	3A	83.4		3A	207.65	3A	60.6					A	B	A	B	B	B	B	B	A	B	A	A	B	B	A	B	A	A	B	A	B	B	H	B	B	A	B	B	A	A	A	A	A	B	B	A
BS00048031_51	TG00173A	IWB8484	3A	83.9		3A	252.78	3A	60.6					A	B	A	B	B	B	B	B	B	B	A	A	B	B	A	B	A	A	B	A	B	B	H	B	B	A	B	B	A	A	A	A	A	B	B	A
GENE-3939_653	TG05293D	IWB33677	3A	83.9		3A	275.72							A	B	A	B	B	B	B	B	B	B	A	A	B	B	A	B	A	A	B	A	B	B	H	B	B	A	B	B	A	A	A	A	A	B	B	A
Kukri_c68006_282	TG0660	IWB47447	3A	83.9		3A	230.4							A	B	A	B	B	B	B	B	B	B	A	A	B	B	A	B	A	A	B	A	B	B	-	B	B	A	B	B	A	A	A	A	A	B	B	A
RAC875_c3427_734	TG0760	IWB56927	3A	83.9		3A	252.27							A	B	A	B	B	B	B	B	B	B	A	A	B	B	A	B	A	A	B	A	B	B	H	B	B	A	B	B	A	A	A	A	A	B	B	A
Tdurum_contig83663_371	TG09503A	IWB73647	3A	83.9		3A	230.4							A	B	A	B	B	B	B	B	B	B	A	A	B	B	A	B	A	A	B	A	B	B	H	B	B	A	B	B	A	A	A	A	A	B	B	A
wsnp_BE490613A_Ta_2_1	TG09753A	IWA234	3A	83.9		3A	244.99							A	B	A	B	B	B	B	B	B	B	A	A	B	B	A	B	A	A	B	A	B	B	H	B	B	A	B	B	A	A	A	A	A	B	B	A
wsnp_CAP11_c318_261649	TG09803A	IWA743	3A	83.9		3A	244.8	3A	60.6					A	B	A	B	B	B	B	B	B	B	A	A	B	B	A	B	A	A	B	A	B	B	H	B	B	A	B	B	A	A	A	A	A	B	B	A
BobWhite_c18408_199	TG13683A	IWB1175	3A	83.9		3A	252.78	3A	60.6					A	B	A	B	B	B	B	B	B	B	A	A	B	B	A	B	A	A	B	A	B	B	H	B	B	A	B	B	A	A	A	A	A	B	B	A
GENE-3939_576	TG16683D	IWB33676	3A	83.9		3A	230.31							A	B	A	B	H	B	B	B	B	B	A	A	B	B	A	B	A	A	B	A	B	B	H	B	B	A	B	B	A	A	A	A	A	B	B	A
Kukri_c47643_920	TG28543A	IWB45790	3A	83.9		3A	230.4							A	B	A	B	B	B	B	B	B	B	A	A	B	B	A	B	A	A	B	A	B	B	H	B	B	A	B	B	A	A	A	A	A	B	B	A
BS00021871_51	TG33883B	IWB6774	3A	83.9		3A	230.4							A	B	A	B	H	B	B	B	B	B	A	A	B	B	A	B	A	A	B	A	B	B	H	B	B	A	B	B	A	A	A	A	A	B	B	A
Excalibur_c52446_519	TG3874	IWB27319	3A	83.9		3A	253.28	3A	59					A	B	A	B	B	B	B	B	B	B	A	A	B	B	A	B	A	A	B	A	B	B	H	B	B	A	B	B	A	A	A	A	A	B	B	A
wsnp_BE494474A_Ta_2_2	TG48273A	IWA249	3A	83.9		3A	250.77							A	B	A	B	B	B	B	B	B	B	A	A	B	B	A	B	A	A	B	A	B	B	H	B	B	A	B	B	A	A	A	A	A	B	B	A
wsnp_Ku_c5378_9559013	TG23743A	IWA7159	3A	84.5		3A	294.94	3A	61.4					A	B	A	B	B	B	B	B	B	B	A	B	B	B	A	B	A	A	B	A	B	B	H	B	B	A	B	B	A	A	A	A	A	B	B	A
BS00107444_51	TG37863A	IWB12317	3A	84.5		3A	291.47	3A	61.4					A	B	A	B	B	B	B	B	B	B	A	B	B	B	A	B	A	A	B	A	B	B	H	B	B	A	B	B	A	A	A	A	A	B	B	A
wsnp_Ex_rep_c66685_65003254	TG45753A	IWA5285	3A	84.5		3A	298.54	3A	61.4					A	B	A	B	B	B	B	B	B	-	A	B	B	B	A	B	A	A	B	A	B	B	H	B	B	A	B	B	A	A	A	A	A	B	B	A
wsnp_Ra_c34117_42876812	TG01933A	IWA7877	3A	85		3A	290.79							A	B	A	B	B	B	B	B	B	B	A	B	B	B	A	B	A	A	B	A	B	B	H	B	B	A	B	B	A	A	A	A	A	B	B	A
RAC875_s120038_124	TG0847	IWB63511	3A	85		3A	291.47							A	B	A	B	-	B	B	B	B	B	A	B	B	B	A	B	A	A	B	A	B	B	H	B	B	A	B	B	A	A	A	A	A	B	B	A
wsnp_Ex_c27150_36365659	TG22573A	IWA3093	3A	85		3A	290.49							A	B	A	B	H	B	B	B	B	B	A	B	B	B	A	B	A	A	B	A	B	B	H	B	B	A	B	B	A	A	A	A	A	B	B	A
wsnp_Ex_rep_c66685_65003087	TG23153A	IWA5284	3A	85		3A	290.49							A	B	A	B	H	B	B	B	B	B	A	B	B	B	A	B	A	A	B	A	B	B	H	B	B	A	B	B	A	A	A	A	A	B	B	A
BS00003971_51	TG24473A	IWB5937	3A	85		3A	291.47							A	B	A	B	H	B	B	B	B	B	A	B	B	B	A	B	A	A	B	A	B	B	H	B	B	A	B	B	A	A	A	A	A	B	B	A
Excalibur_c33545_134	TG38483A	IWB25350	3A	85		3A	291.47	3A	61.4					A	B	A	B	B	B	B	B	B	B	A	B	B	B	A	B	A	A	B	A	B	B	H	B	B	A	B	B	A	A	A	A	A	B	B	A
wsnp_Ex_c28930_38008757	TG45103A	IWA3198	3A	85		3A	291.1	3A	61.4					A	B	A	B	B	B	B	B	B	B	A	B	B	B	A	B	A	A	B	A	B	B	H	B	B	A	B	B	A	A	A	A	A	B	B	A
Ex_c18484_2048	TG00423A	IWB20020	3A	85.6		3A	279.64							A	B	A	B	B	B	B	B	B	B	A	A	B	B	A	B	A	A	B	A	B	B	H	B	B	A	B	B	A	A	A	A	A	B	B	A
wsnp_Ku_c4886_8753646	TG33353A	IWA7114	3A	85.6		3A	271.5	3A	60.6					A	B	A	B	-	B	B	B	B	B	A	A	B	B	A	B	A	A	B	A	B	B	H	B	B	A	B	B	A	A	A	A	A	B	B	A
Tdurum_contig57139_318	TG35423A	IWB72560	3A	86.2		3A	279.64							A	B	A	B	B	B	B	B	B	B	A	A	B	B	A	B	A	A	B	A	B	B	H	B	B	A	B	B	A	A	A	A	A	B	B	A
Ex_c18484_2026	TG38123A	IWB20019	3A	86.2		3A	279.64							A	B	A	B	B	B	B	B	B	B	A	A	B	B	A	B	A	A	B	A	B	B	H	B	B	A	B	B	A	A	A	A	A	B	B	A
wsnp_Ex_rep_c69752_68711460	TG13423A	IWA5632	3A	86.2		3A	259.32							A	B	A	B	B	B	B	B	B	B	A	A	B	B	A	B	A	A	B	A	B	B	H	B	B	A	B	B	A	A	A	A	A	B	B	A
Ku_c56370_1155	TG28023A	IWB39634	3A	86.2		3A	260.13	3A	60.6					A	B	A	B	B	B	B	B	B	B	A	A	B	B	A	B	A	A	B	A	B	B	H	B	B	A	B	B	A	A	A	A	A	B	B	A
wsnp_Ex_c9145_15214903	TG48503A	IWA4883	3A	86.2		3A	259.32							A	B	A	B	B	B	B	B	B	B	A	A	B	B	A	B	A	A	B	A	B	B	H	B	B	A	B	B	A	A	A	A	A	B	B	A
wsnp_RFL_Contig3396_3515504	TG01963B	IWA8465	3A	86.2		3A	245.19	3A	59					A	B	A	B	B	B	B	B	B	B	A	A	B	B	A	B	A	A	B	A	B	B	H	B	B	A	B	B	A	A	A	A	A	B	B	A
BobWhite_c34548_96	TG11633A	IWB2704	3A	86.2		3A	229.86							A	B	A	B	B	B	B	B	B	B	A	A	B	B	A	B	A	A	B	A	B	B	H	B	B	A	B	B	A	A	A	A	A	B	B	A
Tdurum_contig28699_54	TG20673A	IWB69595	3A	86.2		3A	279.64							A	B	A	B	B	B	B	B	B	B	A	A	B	B	A	B	A	A	B	A	B	B	A	B	B	A	B	B	A	A	A	A	A	B	B	A
wsnp_Ku_c9433_15811664	TG48643A	IWA7355	3A	86.2		3A	259.32							A	B	A	B	B	B	B	B	B	B	A	A	B	B	A	B	A	A	B	A	B	B	H	B	B	A	B	B	A	A	A	A	A	B	B	A
RAC875_rep_c104403_524	TG19883A	IWB61370	3A	86.7		3A	204.86							A	B	A	B	B	B	B	B	A	B	A	A	B	B	A	B	A	A	B	A	B	B	H	B	B	A	B	B	A	A	A	A	A	B	B	A
wsnp_Ex_c53364_56625806	TG32463A	IWA4172	3A	86.7		3A	208.56	3A	60.6					A	B	A	B	B	B	B	B	A	B	A	A	B	B	A	B	A	A	B	A	B	B	H	B	B	A	B	B	A	A	A	A	A	B	B	A
BS00010531_51	TG36573A	IWB6240	3A	86.7		3A	204.86							A	B	A	B	H	B	B	B	A	B	A	A	B	B	A	B	A	A	B	A	B	B	H	B	B	A	B	B	A	A	A	A	A	B	B	A
wsnp_Ex_c5929_10402147	TG45513A	IWA4381	3A	86.7		3A	204.86							A	B	A	B	B	B	B	B	A	B	A	A	B	B	A	B	A	A	B	A	B	B	H	B	B	A	B	B	A	A	A	A	A	B	B	A
wsnp_Ra_c44141_50623811	TG46533A	IWA7941	3A	86.7		3A	205.84							A	B	A	B	-	B	B	B	A	B	A	A	B	B	A	B	A	A	B	A	B	B	H	B	B	A	B	B	A	A	A	A	A	B	B	A
Excalibur_c6501_477	TG04723B	IWB28341	3A	87.3		3A	225.74	3A	60.6					A	B	A	B	B	B	B	B	A	B	A	A	B	B	A	B	A	A	B	A	B	B	A	B	B	A	B	B	A	A	A	A	A	B	B	A
wsnp_Ex_c9458_15679797	TG10793A	IWA4917	3A	87.3		3A	229.86							A	B	A	B	B	B	B	B	A	B	A	A	B	B	A	B	A	A	B	A	B	B	A	B	B	A	B	B	A	A	A	A	A	B	B	A
Ku_c28597_514	TG1741	IWB39059	3A	87.3		3A	229.86							A	B	A	B	H	B	B	B	A	B	A	A	B	B	A	B	A	A	B	A	B	B	A	B	B	A	B	B	A	A	A	A	A	B	B	A
Kukri_rep_c70479_411	TG18693A	IWB50023	3A	87.3		3A	229.86							A	B	A	B	-	B	B	B	A	B	A	A	B	B	A	B	A	A	B	A	B	B	A	B	B	A	B	B	A	A	A	A	A	B	B	A
wsnp_Ex_c12948_20511479	TG22093A	IWA1713	3A	87.3		3A	229.86							A	B	A	B	B	B	B	B	A	B	A	A	B	B	A	B	A	A	B	A	B	B	A	B	B	A	B	B	A	A	A	A	A	B	B	A
BS00009657_51	TG24523A	IWB6093	3A	87.3		3A	244.61							A	B	A	B	B	B	B	B	A	B	A	A	B	B	A	B	A	A	B	A	B	B	A	B	B	A	B	B	A	A	A	A	A	B	B	A
BS00071948_51	TG25383D	IWB10585	3A	87.3		3A	251.77							A	B	A	B	H	B	B	B	A	B	A	A	B	B	A	B	A	A	B	A	B	B	A	B	B	A	B	B	A	A	A	A	A	B	B	A
Tdurum_contig50392_1355	TG31063A	IWB72075	3A	87.3		3A	246.12	3A	60.6					A	B	A	B	B	B	B	B	A	B	A	A	B	B	A	B	A	A	B	A	B	B	A	B	B	A	B	B	A	A	A	A	A	B	B	A
wsnp_Ex_c10667_17387885	TG31823A	IWA1377	3A	87.3		3A	247.12	3A	60.6					A	B	A	B	B	B	B	B	A	B	A	A	B	B	A	B	A	A	B	A	B	B	A	B	B	A	B	B	A	A	A	A	A	B	B	A
IAAV4286	TG34593A	IWB34859	3A	87.3		3A	244.11	3A	60.6					A	B	A	B	-	B	B	B	A	B	A	A	B	B	A	B	A	A	B	A	B	B	A	B	B	A	B	B	A	A	A	A	A	B	B	A
RAC875_c11672_1240	TG34933A	IWB53387	3A	87.3		3A	229.86	3A	60.6					A	B	A	B	H	B	B	B	A	B	A	A	B	B	A	B	A	A	B	A	B	B	A	B	B	A	B	B	A	A	A	A	A	B	B	A
Kukri_c5459_334	TG40913A	IWB46437	3A	87.3		3A	248.13	3A	60.6					A	B	A	B	B	B	B	B	A	B	A	A	B	B	A	B	A	A	B	A	B	B	A	B	B	A	B	B	A	A	A	A	A	B	B	A
RAC875_c37118_595	TG42073A	IWB57248	3A	87.3		3A	229.86							A	B	A	B	B	B	B	B	A	B	A	A	B	B	A	B	A	A	B	A	B	B	A	B	B	A	B	B	A	A	A	A	A	B	B	A
RAC875_c53864_310	TG42343A	IWB58989	3A	87.3		3A	229.86							A	B	A	B	B	B	B	B	A	B	A	A	B	B	A	B	A	A	B	A	B	B	A	B	B	A	B	B	A	A	A	A	A	B	B	A
BS00064039_51	TG14733B	IWB9177	3A	87.8		3A	298.15	3A	59.8					A	B	A	B	B	B	B	B	A	B	A	B	B	B	A	B	A	A	B	A	B	B	A	B	B	A	B	B	A	A	A	A	A	B	B	A
wsnp_Ex_c13949_21828493	TG2215	IWA1831	3A	87.8		3A	282.45	3A	62.1					A	B	A	B	H	B	B	B	A	B	A	B	B	B	A	B	A	A	B	A	B	B	A	B	B	A	B	B	A	A	A	A	A	B	B	A
IAAV902	TG27643A	IWB35578	3A	87.8		3A	298.15							A	B	A	B	H	B	B	B	A	B	A	B	B	B	A	B	A	A	B	A	B	B	A	B	B	A	B	B	A	A	A	A	A	B	B	A
Kukri_rep_c87640_135	TG34883A	IWB50458	3A	87.8		3A	295.96	3A	59.8					A	B	A	B	B	B	B	B	A	B	A	B	B	B	A	B	A	A	B	A	B	B	A	B	B	A	B	B	A	A	A	A	A	B	B	A
wsnp_Ex_c11877_19055556	TG44673A	IWA1547	3A	87.8		3A	294.01							A	B	A	B	B	B	B	B	A	B	A	B	B	B	A	B	A	A	B	A	B	B	A	B	B	A	B	B	A	A	A	A	A	B	B	A
wsnp_Ku_c44716_51926415	TG33333A	IWA7073	3A	89		3A	305.32	3A	62.9					A	B	A	B	B	B	B	B	A	B	A	B	B	B	A	A	A	A	B	A	B	B	A	B	B	A	B	B	A	A	A	A	A	B	B	A
Excalibur_c39248_485	TG04503A	IWB26018	3A	91.8		3A	319.05					3A	150.63	A	B	A	B	B	B	B	B	A	B	A	B	B	B	A	A	A	A	B	A	B	B	B	B	B	A	B	B	A	A	A	A	A	B	B	A
RAC875_rep_c109433_782	TG0829	IWB61883	3A	91.8		3A	322.6					3A	150.27	A	B	A	B	B	B	B	B	A	B	A	B	B	B	A	A	A	A	B	A	B	B	H	B	B	A	B	B	A	A	A	A	A	B	B	A
wsnp_Ku_c18497_27803432	TG23483A	IWA6652	3A	91.8		3A	323.27					3A	151	A	B	A	B	B	B	B	B	A	B	A	B	B	B	A	A	A	A	B	A	B	B	H	B	B	A	B	B	A	A	A	A	A	B	B	A
IAAV8483	TG27613D	IWB35484	3A	91.8		3A	313.68					3A	149.53	A	B	A	B	H	B	B	B	A	B	A	B	B	B	A	A	A	A	B	A	B	B	H	B	B	A	B	B	A	A	A	A	A	B	B	A
BS00001478_51	TG02513A	IWB5794	3A	92.3		3A	323.37							A	B	A	B	B	B	B	B	B	B	A	B	B	B	A	A	A	A	B	A	B	B	H	B	B	A	B	B	A	A	A	A	A	B	B	A
BS00061179_51	TG03113A	IWB8831	3A	92.3		3A	323.37							A	B	A	B	B	B	B	B	B	B	A	B	B	B	A	A	A	A	B	A	B	B	H	B	B	A	B	B	A	A	A	A	A	B	B	A
wsnp_Ex_c9483_15722127	TG32773A	IWA4926	3A	92.3		3A	323.37							A	B	A	B	B	B	B	B	B	B	A	B	B	B	A	A	A	A	B	A	B	B	H	B	B	A	B	B	A	A	A	A	A	B	B	A
BS00000445_51	TG33803A	IWB5751	3A	92.3		3A	323.37							A	B	A	B	B	B	B	B	B	B	A	B	B	B	A	A	A	A	B	A	B	B	H	B	B	A	B	B	A	A	A	A	A	B	B	A
BS00080879_51	TG47033A	IWB11155	3A	92.3		3A	322.96							A	B	A	B	B	B	B	B	B	B	A	B	B	B	A	A	A	A	B	A	B	B	H	B	B	A	B	B	A	A	A	A	A	B	B	A
wsnp_Ex_c8884_14841846	TG32753A	IWA4851	3A	92.9		3A	321.88	3A	73					A	B	A	B	B	B	B	B	B	B	A	B	B	B	A	A	A	A	B	A	B	B	H	B	B	A	B	B	A	A	A	A	A	B	B	A
wsnp_Ex_c14202_22145805	TG01603A	IWA1879	3A	94		3A	357.87	3A	84.7					A	B	A	B	B	B	B	B	B	B	A	B	B	B	A	A	A	A	B	A	B	B	A	B	B	A	B	B	A	A	A	A	A	B	B	A
Excalibur_c56240_176	TG0464	IWB27647	3A	94		3A	348.18	3A	81.6					A	B	A	B	B	B	B	B	B	B	A	B	B	B	A	A	A	A	B	A	B	B	A	B	B	A	B	B	A	A	A	A	A	B	B	A
IACX5899	TG0578	IWB36056	3A	94		3A	357.87	3A	84.7			3A	174.01	A	B	A	B	B	B	B	B	B	B	A	B	B	B	A	A	A	A	B	A	B	B	A	B	B	A	B	B	A	A	A	A	A	B	B	A
RAC875_c47550_437	TG1957	IWB58368	3A	94		3A	354.4	3A	82.4					A	B	A	B	B	B	B	B	B	B	A	B	B	B	A	A	A	A	B	A	B	B	A	B	B	A	B	B	A	A	A	A	A	B	B	A
wsnp_CAP8_c1007_643393	TG3174	IWA1136	3A	94		3A	357.47	3A	84.7			3A	174.01	A	B	A	B	B	B	B	B	B	B	A	B	B	B	A	A	A	A	B	A	B	B	A	B	B	A	B	B	A	A	A	A	A	B	B	A
IAAV8170	TG3970	IWB35440	3A	94		3A	357.47	3A	84.7			3A	174.79	A	B	A	B	-	B	B	B	B	B	A	B	B	B	A	A	A	A	B	A	B	B	A	B	B	A	B	B	A	A	A	A	A	B	B	A
wsnp_Ku_c8400_14280021	TG46343A	IWA7324	3A	94		3A	360.7	3A	84.7					A	B	A	B	B	B	B	B	B	B	A	B	B	B	A	A	A	A	B	A	B	B	A	B	B	A	B	B	A	A	A	A	A	B	B	A
Kukri_rep_c69970_717	TG06863A	IWB49970	3A	95.1		3A	347.21	3A	81.6			3A	169.35	A	B	A	B	B	B	B	B	A	B	A	B	B	B	A	A	A	A	B	A	B	B	A	B	B	A	B	B	A	A	A	A	A	B	B	A
BS00050109_51	TG1456	IWB8584	3A	99		3A	370.11							A	B	A	B	B	B	B	B	A	B	A	B	B	B	A	A	A	A	B	A	B	B	A	B	B	A	B	B	A	A	A	A	A	B	B	A
BS00022058_51	TG46803A	IWB6884	3A	100.1		7D	106.23							A	B	A	B	H	B	B	B	B	B	A	H	B	B	A	A	A	A	H	A	B	B	A	H	H	A	B	H	A	A	A	A	A	B	B	A
RAC875_c10194_910	TG07203D	IWB52941	3A	100.7		3A	385.35							A	B	A	B	B	B	B	B	B	B	A	B	B	B	A	A	A	A	B	A	B	B	A	B	B	A	B	B	A	A	A	A	A	B	B	A
RAC875_c10194_673	TG18943A	IWB52940	3A	100.7		3A	385.35							A	B	A	B	-	B	B	B	B	B	A	B	B	B	A	A	A	A	B	A	B	B	A	B	B	A	B	B	A	A	A	A	A	B	B	A
wsnp_Ex_c1894_3575749	TG32033A	IWA2362	3A	100.7		3A	372.57							A	B	A	B	B	B	B	B	B	B	A	B	B	B	A	A	A	A	B	A	B	B	A	B	B	A	B	B	A	A	A	A	A	B	B	A
wsnp_Ex_c12341_19693090	TG1005	IWA1611	3A	101.3		3A	383.09	3A	99.3					A	B	A	B	B	B	B	B	B	B	A	B	B	B	A	A	A	A	B	A	B	B	A	A	B	A	B	B	A	A	A	A	A	B	B	A
Kukri_c10751_1031	TG47713A	IWB40418	3A	104.6		3A	399.26							A	B	A	B	B	B	B	B	A	B	A	B	B	B	A	A	A	A	B	A	B	B	A	A	B	A	B	B	A	A	A	A	A	B	B	A
Kukri_c10751_264	TG28063A	IWB40420	3A	104.6		3A	399.26							A	B	A	B	A	B	B	B	A	B	A	B	B	B	A	A	A	A	B	A	B	B	A	A	B	A	B	B	A	A	A	A	A	B	B	A
BS00020459_51	TG00133A	IWB6678	3A	104.6		3A	396.47							A	B	A	B	H	B	B	B	A	B	A	B	B	B	A	A	A	A	B	A	B	B	A	A	B	A	B	B	A	A	A	A	A	B	B	A
wsnp_CAP12_c15_9559	TG09843A	IWA926	3A	104.6		3A	398.77							A	B	A	B	B	B	B	B	A	B	A	B	B	B	A	A	A	A	B	A	B	B	A	A	B	A	B	B	A	A	A	A	A	B	B	A
RAC875_c15109_106	TG1906	IWB54057	3A	104.6		3A	398.37							A	B	A	B	B	B	B	B	A	B	A	B	B	B	A	A	A	A	B	A	B	B	A	A	B	A	B	B	A	A	A	A	A	B	B	A
wsnp_BG262734A_Ta_2_3	TG21793A	IWA523	3A	104.6		3A	398.37							A	B	A	B	B	B	B	B	A	B	A	B	B	B	A	A	A	A	B	A	B	B	A	A	B	-	B	B	A	A	A	-	A	B	B	A
wsnp_CAP11_c68_106078	TG21883A	IWA799	3A	104.6		3A	398.77							A	B	A	B	B	B	B	B	A	B	A	B	B	B	A	A	A	A	B	A	B	B	A	A	B	A	B	B	A	A	A	A	A	B	B	A
wsnp_Ex_c15475_23757972	TG35563A	IWA2029	3A	104.6		3A	394.94							A	B	A	B	B	B	B	B	A	B	A	B	B	B	A	A	A	A	B	A	B	B	A	A	B	A	B	B	A	A	A	A	A	B	B	A
BS00049977_51	TG37133A	IWB8579	3A	104.6		3A	398.82							A	B	A	B	B	B	B	B	A	B	A	B	B	B	A	A	A	A	B	A	B	B	A	A	B	A	B	B	A	A	A	A	A	B	B	A
wsnp_Ex_c15475_23756906	TG48323A	IWA2028	3A	104.6		3A	396.47							A	B	A	B	B	B	B	B	A	B	A	B	B	B	A	A	A	A	B	A	B	B	A	A	B	A	B	B	A	A	A	A	A	B	B	A
BS00091887_51	TG34203A	IWB11738	3A	106.9		3A	402.77	3A	113.3			3A	199.6	A	B	A	B	B	B	B	B	B	B	A	B	B	B	B	A	A	A	B	A	B	B	H	A	B	A	B	B	A	A	A	A	A	B	B	A
RAC875_c52195_324	TG29663A	IWB58806	3A	130.2		3A	437.71	3A	124.9	3A_2	11.3589			A	B	A	A	B	A	B	B	A	B	A	B	B	B	B	A	A	B	B	A	A	B	-	A	B	A	B	A	A	A	A	A	A	B	B	A
BS00076772_51	TG11893A	IWB10900	3A	130.8		3A	438.87	3A	124.9			3A	221.91	A	B	A	A	B	A	B	B	A	B	A	B	B	B	B	A	A	B	B	A	A	B	A	A	B	A	B	A	A	A	A	A	A	B	B	A
wsnp_CAP8_c6939_3242530	TG31763A	IWA1207	3A	134.1		3A	428.81							A	B	A	A	B	A	B	A	A	B	A	B	B	B	B	A	A	B	B	A	A	B	H	A	B	A	B	A	A	A	A	A	A	B	B	A
CAP11_c1022_66	TG11953A	IWB12652	3A	134.7		3A	428.81	3A	126.5					A	B	A	A	B	A	B	A	A	B	A	B	B	B	B	A	A	B	B	A	A	B	-	A	B	A	B	A	A	A	A	A	A	B	B	A
CAP11_c1022_117	TG15263A	IWB12651	3A	134.7		3A	428.81	3A	126.5					A	B	A	A	B	A	B	A	A	B	A	B	B	B	B	A	A	B	B	A	A	B	H	A	B	A	B	A	A	A	A	A	A	B	B	A
BS00022862_51	TG14293A	IWB7295	3A	135.2		3A	424.9							A	B	A	A	B	A	B	A	A	B	A	B	B	B	B	A	A	B	B	A	A	B	A	A	B	A	B	A	A	A	A	A	A	B	B	A
Kukri_rep_c106620_208	TG01023A	IWB49197	3A	135.8		3A	430.06	3A	126.5					A	B	A	A	-	A	B	A	A	B	A	B	B	B	B	A	A	B	B	A	A	B	-	A	B	A	B	A	A	A	A	A	A	B	B	A
Tdurum_contig42495_389	TG09093A	IWB71198	3A	135.8		3A	442.73	3A	126.5	3A_2	8.72623			A	B	A	A	B	A	B	A	A	B	A	B	B	B	B	A	A	B	B	A	A	B	H	A	B	A	B	A	A	A	A	A	A	B	B	A
wsnp_Ex_c1903_3592518	TG44883A	IWA2372	3A	135.8		3A	429.19	3A	126.5					A	B	A	A	B	A	B	A	A	B	A	B	B	B	B	A	A	B	B	A	A	B	-	A	B	A	B	A	A	A	A	A	A	B	B	A
IAAV1523	TG16773B	IWB34397	3A	142.6		3A	446.12							A	B	A	A	B	A	A	A	B	B	A	B	B	B	B	B	A	B	B	A	A	B	B	A	B	A	B	A	A	A	A	A	A	B	A	A
Tdurum_contig55841_351	TG2107	IWB72476	3A	147.7		3A	456.07	3A	135.1					A	B	A	A	B	A	A	A	B	A	A	B	B	B	B	B	A	B	B	A	A	B	B	A	B	A	B	A	A	A	A	A	A	B	A	B
wsnp_Ra_c4373_7946257	TG1148	IWA7938	3A	151		3A	461.86	3B	118.297					A	B	A	A	B	A	A	A	B	A	A	B	B	B	B	B	A	B	B	A	A	A	B	A	B	A	B	A	A	A	A	A	A	B	A	B
wsnp_Ex_c10630_17338703	TG01573A	IWA1366	3A	151.6		3A	463.52							A	B	A	A	B	A	A	A	B	A	A	B	B	B	B	B	A	B	B	A	A	A	B	A	B	A	B	A	A	A	A	A	A	B	A	B
BS00023028_51	TG02843A	IWB7383	3A	151.6		3A	457.6							A	B	A	A	B	-	A	-	B	A	A	B	B	B	B	B	A	B	B	A	-	-	B	A	B	-	B	A	A	-	-	-	-	B	A	B
Excalibur_c24829_189	TG38393A	IWB24224	3A	151.6		3A	458.11							A	B	A	A	B	A	A	A	B	A	A	B	B	B	B	B	A	B	B	A	A	A	B	A	B	A	B	A	A	A	A	A	A	B	A	B
Kukri_c30244_619	TG4055	IWB43831	3A	151.6		3A	457.6							A	B	A	A	B	A	A	A	B	A	A	B	B	B	B	B	A	B	B	A	A	A	B	A	B	A	B	A	A	A	A	A	A	B	A	B
Ra_c4373_453	TG2896	IWB52089	3A	152.2		3A	461.73	3A	138.9	3A_2	0			A	B	A	A	H	A	A	A	A	A	A	B	B	B	B	B	A	B	B	A	A	A	H	A	B	A	B	A	A	A	A	A	A	B	A	B
wsnp_Ex_c10630_17338753	TG44623A	IWA1367	3A	152.2		3A	463.52							A	B	A	A	B	A	A	A	A	A	A	B	B	B	B	B	A	B	B	A	A	A	-	A	B	A	B	A	A	A	A	A	A	B	A	B
CAP8_c3568_256	TG3804	IWB14695	3A	153.3		3A	463.82							A	B	A	A	B	A	A	A	A	A	A	B	B	B	B	B	A	B	B	A	A	A	H	A	B	A	B	A	A	A	A	A	A	B	A	B
RAC875_c24982_202	TG41873A	IWB55724	3A	153.3		3A	457.6							A	B	A	A	B	A	A	A	A	A	A	B	B	B	B	B	A	B	B	A	A	A	H	A	B	A	B	A	A	A	A	A	A	B	A	B
wsnp_BE426418A_Ta_2_2	TG21683A	IWA95	3A	154.4		3A	477.73	3A	143.2					A	B	A	A	B	A	A	A	A	A	A	B	B	B	B	B	A	B	B	A	A	A	H	A	B	A	B	A	A	A	A	A	A	B	A	B
wsnp_BE426418A_Ta_2_1	TG44373A	IWA94	3A	154.4		3A	477.73							A	B	A	A	B	A	A	A	A	A	A	B	B	B	B	B	A	B	B	A	A	A	H	A	B	A	B	A	A	A	A	A	A	B	A	B
IAAV3851	TG47533A	IWB34789	3A	157.2		3A	485.5							A	B	A	A	B	A	A	A	B	A	A	B	B	B	B	B	A	B	B	A	A	A	H	A	B	A	B	A	A	A	A	A	A	B	A	B
RAC875_c99055_69	TG35103A	IWB61269	3A	158.3		3A	493.28							A	B	A	A	B	A	A	A	A	A	A	B	B	B	B	B	A	B	B	A	A	A	B	A	B	A	B	A	A	A	A	A	A	B	A	B
Ku_c26872_269	TG05953A	IWB39004	3A	159.4		3A	494.04							A	B	A	A	B	A	A	A	A	A	A	B	B	A	B	B	A	B	B	A	A	A	B	A	B	A	B	A	A	A	A	A	A	B	A	B
wsnp_Ex_rep_c104125_88923836	TG32793A	IWA5111	3A	161.1		3A	491.81							A	B	A	A	B	A	A	A	B	A	A	B	B	A	B	B	A	B	B	A	A	A	B	A	B	A	B	A	A	A	A	A	A	B	A	B
wsnp_Ex_c55096_57733841	TG10623A	IWA4258	3A	163.4		3A	507.53							A	B	A	A	B	A	A	A	B	A	A	B	B	A	B	B	A	B	B	A	A	A	H	A	B	A	B	A	A	A	A	A	A	B	A	B
wsnp_Ra_c29624_38979654	TG23893A	IWA7835	3A	163.4		3A	513.71							A	B	A	A	H	A	A	A	B	A	A	B	B	A	B	B	A	B	B	A	A	A	H	A	B	A	B	A	A	A	A	A	A	B	A	B
RAC875_c61934_186	TG29723A	IWB59641	3A	163.4		3A	504.34							A	B	A	A	B	A	A	A	B	A	A	B	B	A	B	B	A	B	B	A	A	A	H	A	B	A	B	A	A	A	A	A	A	B	A	B
JD_c7528_325	TG3997	IWB37804	3A	163.4		3A	513.71							A	B	A	A	B	A	A	A	B	A	A	B	B	A	B	B	A	B	B	A	A	A	H	A	B	A	B	A	A	A	A	A	A	B	A	B
RAC875_rep_c106170_204	TG42703A	IWB61557	3A	163.4		3A	504.29							A	B	A	A	B	A	A	A	B	A	A	B	B	A	B	B	A	B	B	A	A	A	H	A	B	A	B	A	A	A	A	A	A	B	A	B
wsnp_Ex_c55096_57733894	TG4548	IWA4259	3A	163.4		3A	503.58							A	B	A	A	B	A	A	A	B	A	A	B	B	A	B	B	A	B	B	A	A	A	B	A	B	A	B	A	A	A	A	A	A	B	A	B
IAAV5507	TG05533B	IWB35035	3A	163.9		3A	502.28							A	B	A	A	B	A	A	A	B	A	A	B	B	A	B	B	A	B	B	A	A	A	H	A	B	A	B	A	A	A	A	A	A	B	A	B
IAAV9044	TG05673A	IWB35582	3A	163.9		3A	501.78							A	B	A	A	-	A	A	A	B	A	A	B	B	A	B	B	A	B	B	A	A	A	H	A	B	A	B	A	A	A	A	A	A	B	A	B
Excalibur_c361_1321	TG04473A	IWB25665	3A	165										A	B	A	A	H	A	A	A	A	A	A	B	B	A	B	B	A	B	B	A	A	A	H	A	B	A	B	A	A	A	A	A	A	B	A	B
BS00074926_51	TG14933A	IWB10770	3A	170.6		3A	518.84	3A	162.9					A	B	A	A	B	A	A	A	A	A	A	B	B	A	A	B	A	B	B	A	A	B	H	A	B	A	B	A	A	A	A	A	A	B	A	B
Tdurum_contig31235_99	TG30883A	IWB70196	3A	170.6		3A	518.84	3A	162.9					A	B	A	A	B	A	A	A	A	A	A	B	B	A	A	B	A	B	B	A	A	B	H	A	B	A	B	A	A	A	A	A	A	B	A	B
Kukri_s117946_404	TG41343A	IWB50704	3A	170.6		3A	525.63	3A	162.9					A	B	A	A	B	A	A	A	A	A	A	B	B	A	A	B	A	B	B	A	A	B	B	A	B	A	B	A	A	A	A	A	A	B	A	B
Excalibur_c7610_143	TG47333D	IWB28780	3A	171.2		3A	518.84	3A	162.9					A	B	A	A	B	A	A	A	A	A	A	B	B	A	A	B	A	B	B	A	A	B	-	A	B	A	B	A	A	A	A	A	A	B	A	B
wsnp_Ex_c45877_51547406	TG10523A	IWA3949	3A	174.7		3A	531.29	3A	165					A	B	A	A	B	A	A	A	A	A	A	B	B	A	A	B	A	B	B	A	A	B	B	A	B	A	B	A	A	A	A	A	A	B	A	B
RAC875_c65573_410	TG1973	IWB59960	3A	174.7		3A	531.55	3A	165					A	B	A	A	B	A	A	A	A	A	A	B	B	A	A	B	A	B	B	A	A	B	B	A	B	A	B	A	A	A	A	A	A	B	A	B
RAC875_c53037_181	TG07903B	IWB58893	3A	175.3		3B	591.96							A	B	A	A	B	A	A	A	A	A	A	B	B	A	A	B	A	B	B	A	A	B	B	A	B	A	B	A	A	A	A	A	A	B	A	B
GENE-0559_171	TG16511D	IWB31968	3B	0		2B	13.44	2B	0.8					A	B	A	A	A	A	A	A	B	B	A	B	B	A	B	B	A	B	A	B	A	A	B	B	A	A	A	A	A	A	A	A	B	A	B	B
Kukri_c17082_378	TG1771	IWB41709	3B	1.7		3B	19.55	3B	0.7693					A	B	A	A	A	A	A	A	B	A	A	B	B	A	B	B	A	B	A	B	A	A	-	B	A	A	A	A	A	A	A	A	B	A	B	B
BS00062677_51	TG03133B	IWB8884	3B	2.3		3B	24.51	3B	4.6231					A	B	A	A	A	A	A	A	B	A	A	B	B	A	B	B	A	B	A	B	A	A	B	B	A	A	A	A	A	A	A	A	B	A	B	B
IAAV4876	TG05493D	IWB34942	3B	2.3		3B	24.51							A	B	A	A	A	A	A	A	B	A	A	B	B	A	B	B	A	B	A	B	A	A	B	B	A	A	A	A	A	A	A	A	B	A	B	B
RAC875_c62483_112	TG08073D	IWB59693	3B	2.3		3B	29.03							A	B	A	A	A	A	A	A	B	A	A	B	B	A	B	B	A	B	A	B	A	A	B	B	A	A	A	A	A	A	A	A	B	A	B	B
tplb0028p23_691	TG09653A	IWB74349	3B	2.3		3B	31.05							A	B	A	A	A	A	A	A	B	A	A	B	B	A	B	B	A	B	A	B	A	A	B	B	A	A	A	A	A	A	A	A	B	A	B	B
Kukri_c12817_59	TG1764	IWB40900	3B	2.3		3B	24.51							A	B	A	A	A	A	A	A	B	A	A	B	B	A	B	B	A	B	A	B	A	A	B	B	A	A	A	A	A	A	A	A	B	A	B	B
Tdurum_contig50954_1264	TG20963B	IWB72134	3B	2.3		3B	29.54							A	B	A	A	A	A	A	A	B	A	A	B	B	A	B	B	A	B	A	B	A	A	B	B	A	A	A	A	A	A	A	A	B	A	B	B
Tdurum_contig50954_394	TG20973B	IWB72136	3B	2.3		3B	24.51							A	B	A	A	A	A	A	A	B	A	A	B	B	A	B	B	A	B	A	B	A	A	B	B	A	A	A	A	A	A	A	A	B	A	B	B
Tdurum_contig50954_880	TG2098	IWB72138	3B	2.3		3B	24.51							A	B	A	A	A	A	A	A	B	A	A	B	B	A	B	B	A	B	A	B	A	A	B	B	A	A	A	A	A	A	A	A	B	A	B	B
Tdurum_contig50954_1393	TG31083B	IWB72135	3B	2.3		3B	31.05							A	B	A	A	A	A	A	A	B	A	A	B	B	A	B	B	A	B	A	B	A	A	B	B	A	A	A	A	A	A	A	A	B	A	B	B
Tdurum_contig50954_475	TG31093B	IWB72137	3B	2.3		3B	24.51							A	B	A	A	A	A	A	A	B	A	A	B	B	A	B	B	A	B	A	B	A	A	B	B	A	A	A	A	A	A	A	A	B	A	B	B
Tdurum_contig77551_589	TG3133	IWB73424	3B	2.3		3B	24.51							A	B	A	A	A	A	A	A	B	A	A	B	B	A	B	B	A	B	A	B	A	A	B	B	A	A	A	A	A	A	A	A	B	A	B	B
tplb0028p23_852	TG3146	IWB74350	3B	2.3		3B	31.05							A	B	A	A	A	A	A	A	B	A	A	B	B	A	B	B	A	B	A	B	A	A	B	B	A	A	A	A	A	A	A	A	B	A	B	B
Kukri_c32803_150	TG40593B	IWB44132	3B	2.3		3B	27.81	3B	4.6231					A	B	A	A	A	A	A	A	B	A	A	B	B	A	B	B	A	B	A	B	A	A	B	B	A	A	A	A	A	A	A	A	B	A	B	B
Tdurum_contig49804_392	TG43863B	IWB72020	3B	4		3B	34.66	3B	4.6231			3D	189.47	A	B	A	A	A	A	A	A	A	A	A	B	B	A	B	B	A	B	A	B	A	A	B	B	A	A	A	A	A	A	A	A	B	A	B	B
wsnp_Ra_c41135_48426638	TG33573B	IWA7918	3B	5.6		3B	29.54	3B	5.3865			3D	191.55	A	B	A	A	A	A	A	A	A	A	A	B	B	A	B	B	A	B	A	B	A	A	B	B	A	A	A	A	A	A	A	A	B	A	B	B
IACX5776	TG05763D	IWB36021	3B	9		3B	47.99							A	B	A	A	A	A	A	A	B	A	A	B	B	A	B	B	A	B	A	A	A	A	B	B	A	A	A	A	A	A	A	A	B	A	B	B
wsnp_Ex_c8360_14085858	TG4562	IWA4796	3B	9		3B	41.66	3B	6.9192					A	B	A	A	A	A	A	A	A	A	A	B	B	A	B	B	A	B	A	A	A	A	B	B	A	A	A	A	A	A	A	A	B	A	B	B
Kukri_c3773_1450	TG1805	IWB44727	3B	10.1		3B	43.44	3B	7.7005					A	B	A	A	A	A	A	A	A	A	A	B	B	A	B	B	A	B	A	A	A	A	B	B	A	A	A	A	A	A	A	A	B	A	B	B
Excalibur_c94546_61	TG26903B	IWB29466	3B	10.1		3B	43.09	3B	7.7005					A	B	A	A	A	A	A	A	A	A	A	B	B	A	B	B	A	B	A	A	A	A	B	B	A	A	A	A	A	A	A	A	B	A	B	B
BS00102646_51	TG03823B	IWB12193	3B	10.7		3B	42.04	3B	7.7005					A	B	A	A	A	A	A	A	A	A	A	B	B	A	B	B	A	-	A	A	A	A	H	B	A	A	A	A	A	A	A	A	-	A	B	-
TA003763-0481	TG4322	IWB65737	3B	11.3		3B	42.04	3B	7.7005					A	B	A	A	A	A	A	A	A	A	A	B	B	A	B	B	A	B	A	A	A	A	H	B	A	A	A	A	A	A	A	A	B	A	B	B
BS00058654_51	TG34023B	IWB8745	3B	11.8		3B	43.09	3B	7.7005					A	B	A	A	A	A	A	A	A	A	A	B	B	A	B	B	A	B	A	A	A	A	B	B	A	A	A	A	A	A	A	A	B	A	B	B
BS00079989_51	TG15003B	IWB11105	3B	11.8		3B	56.07	3B	7.7005					A	B	A	A	A	A	A	A	B	A	A	B	B	A	B	B	A	B	A	A	A	A	B	B	A	A	A	A	A	A	A	A	B	A	B	B
RAC875_c3956_275	TG07693A	IWB57531	3B	12.4		3B	46.67	3B	7.7005					A	B	A	A	A	A	A	A	A	A	A	B	B	A	B	B	A	B	A	A	A	A	H	B	A	A	A	A	A	A	A	A	B	A	B	B
Tdurum_contig93830_1688	TG09561A	IWB73895	3B	12.4		3A	34.96	3B	7.7005					A	B	A	A	A	A	A	A	A	A	A	B	B	A	B	B	A	B	A	A	A	A	A	B	A	A	A	A	A	A	A	A	B	A	B	B
wsnp_Ex_c2723_5047696	TG22583B	IWA3103	3B	12.4		3B	46.17							A	B	A	A	A	A	A	A	A	A	A	B	B	A	B	B	A	B	A	A	A	A	H	B	A	A	A	A	A	A	A	A	B	A	B	B
wsnp_Ex_rep_c66331_64502558	TG32823B	IWA5202	3B	12.4		3B	42.54	3B	7.7005					A	B	A	A	A	A	A	A	A	A	A	B	B	A	B	B	A	B	A	A	A	A	H	B	A	A	A	A	A	A	A	A	B	A	B	B
BS00083706_51	TG37603B	IWB11317	3B	12.4		3B	47.99	3B	7.7005					A	B	A	A	A	A	A	A	A	A	A	B	B	A	B	B	A	B	A	A	A	A	-	B	A	A	A	A	A	A	A	A	B	A	B	B
RAC875_c76611_364	TG29803B	IWB60424	3B	13.5		3B	57.57	3B	7.7005			3D	193.02	A	B	A	A	A	A	A	A	B	A	A	B	B	A	B	B	A	B	A	A	A	A	A	B	A	A	A	A	A	A	A	A	B	A	B	B
Ra_c17608_960	TG41393B	IWB51276	3B	14.1		3B	49.5	3B	7.7005			3D	197.36	A	B	A	A	A	A	A	A	B	A	A	B	B	A	B	B	A	B	A	A	A	A	H	B	A	A	A	A	A	A	A	A	B	A	B	B
wsnp_Ku_c55746_59522526	TG1131	IWA7174	3B	15.2		3B	71.67	3B	10.0098			3D	193.39	A	B	A	A	A	A	A	A	A	A	A	B	B	A	B	B	A	B	A	A	A	A	-	B	A	A	A	A	A	A	A	A	B	A	B	B
CAP11_c2057_200	TG37923B	IWB12745	3B	15.7		3B	55.56							A	B	A	A	A	A	A	A	B	A	A	B	B	A	B	B	A	B	A	A	A	A	B	B	A	A	A	A	A	A	A	A	B	A	B	B
BobWhite_c17021_269	TG35993A	IWB985	3B	16.3		3B	57.57					3D	193.39	A	B	A	A	A	A	A	A	B	A	A	B	B	A	B	B	A	B	A	A	A	A	B	B	A	A	A	A	A	A	A	A	B	A	B	B
BobWhite_c7454_492	TG02403B	IWB4344	3B	16.3		3B	57.57	3B	10.0098					A	B	A	A	A	A	A	A	B	A	A	B	B	A	B	B	A	B	A	A	A	A	B	B	A	A	A	A	A	A	A	A	B	A	B	B
Tdurum_contig14251_320	TG08983B	IWB68172	3B	16.3		3B	70.48	3B	10.0098			3D	193.39	A	B	A	A	A	A	A	A	B	A	A	B	B	A	B	B	A	B	A	A	A	A	B	B	A	A	A	A	A	A	A	A	B	A	B	B
wsnp_Ex_rep_c67625_66279491	TG23213B	IWA5426	3B	16.3		3B	57.57	3B	10.0098			3D	193.39	A	B	A	A	A	A	A	A	B	A	A	B	B	A	B	B	A	B	A	A	A	A	B	B	A	A	A	A	A	A	A	A	B	A	B	B
tplb0059m03_1516	TG31563B	IWB75221	3B	16.3		3B	51.51	3B	10.0098			3D	193.39	A	B	A	A	A	A	A	A	B	A	A	B	B	A	B	B	A	B	A	A	A	A	B	B	A	A	A	A	A	A	A	A	B	A	B	B
wsnp_Ex_c8386_14127329	TG3569	IWA4800	3B	16.3		3B	55.06	3B	10.0098			3D	193.39	A	B	A	A	A	A	A	A	B	A	A	B	B	A	B	B	A	B	A	A	A	A	B	B	A	A	A	A	A	A	A	A	B	A	B	B
BS00098868_51	TG37793B	IWB12053	3B	16.3		3B	57.07					3D	193.39	A	B	A	A	A	A	A	A	B	A	A	B	B	A	B	B	A	B	A	A	A	A	B	B	A	A	A	A	A	A	A	A	B	A	B	B
Tdurum_contig14251_431	TG43503B	IWB68173	3B	16.3		3B	57.57	3B	10.0098					A	B	A	A	A	A	A	A	B	A	A	B	B	A	B	B	A	B	A	A	A	A	B	B	A	A	A	A	A	A	A	A	B	A	B	B
BobWhite_c3902_175	TG24253B	IWB3026	3B	16.9		3B	51.01	3B	10.0098			3D	193.39	A	B	A	A	A	A	A	A	B	A	A	B	B	A	B	B	A	B	A	A	A	A	B	B	A	A	A	A	A	A	A	A	B	A	B	B
BobWhite_c3902_145	TG02253B	IWB3025	3B	17.4		3B	56.07							A	B	A	A	A	A	A	A	B	A	A	B	B	A	B	B	A	B	A	A	A	A	B	B	A	A	A	A	A	A	A	A	B	A	B	B
Tdurum_contig94629_258	TG44203B	IWB73916	3B	17.4		3B	56.07							A	B	A	A	A	A	A	A	B	A	A	B	B	A	B	B	A	B	A	A	A	A	B	B	A	A	A	A	A	A	A	A	B	A	B	B
CAP7_c1997_79	TG34283B	IWB13878	3B	18		3B	55.56							A	B	A	A	A	A	A	A	B	A	A	B	B	A	B	B	A	B	A	A	A	A	B	B	A	A	A	A	A	A	A	A	B	A	B	B
BS00009393_51	TG02582B	IWB6054	3B	18.5		3B	61.24	3B	10.0098					A	B	A	A	A	A	A	A	B	A	A	B	B	A	B	B	A	B	A	A	A	A	H	B	A	A	A	A	A	A	A	A	B	A	B	B
BS00022154_51	TG36713B	IWB6931	3B	19.1		3B	62.94							A	B	A	A	A	A	A	A	B	A	A	B	B	A	B	B	A	B	A	A	A	A	H	B	A	A	A	A	A	A	A	A	B	A	B	B
BS00111294_51	TG47133B	IWB12639	3B	19.1		3B	64.45							A	B	A	A	A	A	A	A	B	A	A	B	B	A	B	B	A	B	A	A	A	A	H	B	A	A	A	A	A	A	A	A	B	A	B	B
BobWhite_c9711_71	TG24383B	IWB4653	3B	21.3		3B	91.29	3B	13.1636					A	B	A	A	A	A	A	A	B	A	A	B	B	A	B	B	A	B	A	A	A	A	A	B	A	A	A	A	A	A	A	A	B	A	B	B
RAC875_c53353_78	TG42323B	IWB58931	3B	21.3		3B	75.43	3B	13.1636					A	B	A	A	A	A	A	A	B	A	A	B	B	A	B	B	A	B	A	A	A	A	A	B	A	A	A	A	A	A	A	A	B	A	B	B
RFL_Contig5709_3312	TG20213B	IWB65093	3B	21.9		3B	75.43	3B	13.1636					A	B	A	A	A	A	A	A	B	A	A	B	B	A	B	B	A	B	A	A	A	A	A	B	A	A	A	A	A	A	A	A	B	A	B	B
RFL_Contig5709_3005	TG30423B	IWB65092	3B	21.9		3B	75.43	3B	13.1636					A	B	A	A	A	A	A	A	B	A	A	B	B	A	B	B	A	B	A	A	A	A	A	-	A	A	A	A	A	A	A	A	B	A	B	B
RAC875_c5966_1854	TG42433A	IWB59448	3B	21.9		3B	76.27	3B	13.1636					A	B	A	A	A	A	A	A	B	A	A	B	B	A	B	B	A	B	A	A	A	A	A	B	A	A	A	A	A	A	A	A	B	A	B	B
Tdurum_contig79629_538	TG0148	IWB73453	3B	22.4		3B	77.26	3B	14.7389					A	B	A	A	A	A	A	A	B	A	A	B	B	A	B	B	A	B	A	A	A	A	A	B	A	A	A	A	A	A	A	A	B	A	B	B
GENE-1851_76	TG05193D	IWB32683	3B	23		3B	77.26							A	B	A	A	A	A	A	A	B	A	A	B	B	A	B	B	A	B	A	A	A	A	A	B	A	A	A	A	A	A	A	A	B	A	B	B
RAC875_c4389_1412	TG29523B	IWB57994	3B	23		3B	89.42							A	B	A	A	A	A	A	A	B	A	A	B	B	A	B	B	A	B	A	A	A	A	A	B	A	A	A	A	A	A	A	A	B	A	B	B
tplb0043c20_1046	TG31513B	IWB74764	3B	23		3B	76.47	3B	14.7389					A	B	A	A	A	A	A	A	B	A	A	B	B	A	B	B	A	B	A	A	A	A	A	B	A	A	A	A	A	A	A	A	B	A	B	B
BS00010849_51	TG36592A	IWB6299	3B	25.2		3B	83.47	3B	14.7389					A	B	A	A	A	B	A	A	B	A	A	B	B	B	B	B	A	B	A	A	A	A	A	B	A	A	A	A	A	A	A	A	B	A	B	B
wsnp_Ex_c3005_5548573	TG45123B	IWA3260	3B	30.9		3B	89.42							A	B	A	A	A	B	A	B	A	A	A	B	B	B	B	B	A	B	A	A	B	A	H	B	A	A	A	A	B	A	A	A	B	B	B	B
IAAV6442	TG12353D	IWB35202	3B	31.4		3B	100.1							A	B	A	A	A	B	A	B	A	A	A	B	B	B	B	B	A	B	A	A	B	A	H	B	A	A	A	A	B	A	A	A	B	B	B	B
wsnp_BE497169B_Ta_2_2	TG13173B	IWA289	3B	31.4		3B	89.42							A	B	A	A	A	B	A	B	A	A	A	B	B	B	B	B	A	B	A	A	B	A	A	B	A	A	A	A	B	A	A	A	B	B	B	B
Excalibur_rep_c104532_80	TG16413A	IWB30037	3B	33.1		3B	96.46							A	B	A	A	A	B	A	B	B	A	A	B	B	B	B	B	A	B	A	A	B	A	H	B	A	A	A	A	B	A	A	A	B	B	B	B
RAC875_c36432_172	TG07653B	IWB57184	3B	33.6		3B	99.59							A	B	A	A	A	B	A	B	B	A	A	B	B	B	B	B	A	B	A	A	B	A	B	B	A	A	A	A	B	A	A	A	B	B	B	B
BobWhite_c25670_425	TG0218	IWB1925	3B	33.6		3B	97.72							A	B	A	A	A	B	A	B	B	A	A	B	B	B	B	B	A	B	A	A	B	A	H	B	A	A	A	A	B	A	A	A	B	B	B	B
Excalibur_c25566_1000	TG1582	IWB24336	3B	33.6		3B	89.42	3B	21.6467					A	B	A	A	A	B	A	B	B	A	A	B	B	B	B	B	A	B	A	A	B	A	A	B	A	A	A	A	B	A	A	A	B	B	B	B
BS00064956_51	TG03233B	IWB9415	3B	34.8		3B	100.66	3B	17.8224					A	B	A	A	A	B	A	B	B	A	A	B	B	B	B	B	A	B	A	A	B	A	A	B	A	A	A	A	B	A	A	A	B	B	B	B
Excalibur_rep_c67448_528	TG47363A	IWB30862	3B	34.8		3B	97.72							A	B	A	A	A	B	A	B	B	A	A	B	B	B	B	B	A	B	A	A	B	A	H	B	A	A	A	A	B	A	A	A	B	B	B	B
Kukri_rep_c101341_425	TG18533A	IWB48628	3B	34.8		3B	97.72							A	B	A	A	A	B	A	B	B	A	A	B	B	B	B	B	A	B	A	A	B	A	-	B	A	A	A	A	B	A	A	A	B	B	B	B
BS00018764_51	TG24623B	IWB6660	3B	35.3		3B	96.46							A	B	A	A	A	B	A	B	B	A	A	B	B	B	B	B	A	B	A	A	B	A	H	B	A	A	A	A	B	A	A	A	B	B	B	B
Tdurum_contig57914_1144	TG21123B	IWB72603	3B	38.1		3B	103.64							A	B	A	B	A	B	A	B	B	A	A	B	B	B	B	B	A	B	A	A	B	A	A	B	A	A	A	A	B	A	A	A	B	B	B	B
CAP11_c5660_100	TG25723B	IWB12963	3B	38.1		3B	103.64							A	B	A	B	A	B	A	B	B	A	A	B	B	B	B	B	A	B	A	A	B	A	A	B	A	A	A	A	B	A	A	A	B	B	B	B
IACX6214	TG2776	IWB36123	3B	39.8		3B	105.38							A	B	A	B	A	B	A	B	A	A	A	B	B	B	B	B	A	B	A	A	B	A	H	B	A	A	A	A	B	A	A	A	B	B	B	B
Tdurum_contig11684_144	TG20533B	IWB67233	3B	50.6		3B	121.72							A	B	A	B	A	B	A	B	A	A	A	B	B	B	B	B	B	B	A	A	B	A	A	B	A	A	A	A	B	A	B	A	B	B	B	B
BS00030203_51	TG24903B	IWB7760	3B	50.6		3B	121.72							A	B	A	B	A	B	A	B	A	A	A	B	B	B	B	B	B	B	A	A	B	A	A	B	A	A	A	A	B	A	B	A	B	B	B	B
RAC875_c60169_200	TG29703B	IWB59502	3B	50.6		3B	121.72	3B	26.2868					A	B	A	B	A	B	A	B	A	A	A	B	B	B	B	B	B	B	A	A	B	A	-	B	A	A	A	A	B	A	B	A	B	B	B	B
BS00011596_51	TG36617B	IWB6443	3B	50.6		1B	373.64			1B	108.734			A	B	A	B	A	B	A	B	A	A	A	B	B	B	B	B	B	B	A	A	B	A	A	B	A	A	A	A	B	A	B	A	B	B	B	-
Kukri_c13830_487	TG28103B	IWB41101	3B	51.1		3B	120.81							A	B	A	B	A	B	A	B	A	A	A	B	B	B	B	B	B	B	A	A	B	A	H	B	A	A	A	A	B	A	B	A	B	B	B	B
BS00044752_51	TG37063B	IWB8377	3B	51.7		3B	120.22	3B	26.2868					A	B	A	B	A	B	A	B	A	A	A	B	B	B	B	B	B	B	A	A	B	A	A	B	A	A	A	A	B	A	B	A	B	B	B	B
BS00084607_51	TG15063B	IWB11375	3B	52.2		3B	120.22	3B	26.2868					A	B	A	B	A	B	A	B	A	A	A	B	B	B	B	B	B	B	A	A	B	A	A	B	A	A	A	A	B	A	B	A	B	B	B	B
[truncated: 2,843 more rows]
[truncated: 148 more columns]

## Sheet: S4
Supplementary Table S4: 'AAC Innova/P2711' linkage map and 90K single nucleotide polymorphism (SNP) genotyping data.
'AAC Innova/P2711'					Consensus map (Wen et al., 2017)		ITMI		'Kofa/W9262-260D3' (Nilsen et al., 2017)		'Lillian/Vesper' (Nilsen et al., 2017)		Marker genotyping data of parents, doubled haploid population and check cultivars
SNP name	15K array SNP ID	90K array SNP ID	Linkage group	Position	Linkage group	Position	Linkage group	Position	Linkage group	Position	Linkage group	Position	'AAC Innova'	P2711	1	2	3	4	5	7	8	10	11	12	13	14	15	16	17	19	20	21	22	24	26	27	28	29	30	31	32	33	34	36	38	40	41	42	43
BS00047515_51		IWB8466	1A	0	1A	18.55							A	B	B	A	A	B	A	A	A	A	A	A	A	B	A	B	A	B	B	A	B	B	B	A	U	B	A	A	A	B	A	B	B	A	A	B	B
BS00071289_51		IWB10536	1A	0.179	1A	14.69							A	B	B	A	A	B	A	A	A	A	A	A	A	B	A	B	A	B	B	A	B	B	B	A	U	B	A	A	A	B	A	B	B	A	A	B	B
BS00026456_51	TG14351A	IWB7628	1A	0.347	1A	18.05	1A	1.1					A	B	B	A	A	B	A	A	A	A	A	A	A	B	A	B	A	B	B	A	B	B	B	A	U	B	A	A	A	B	A	B	B	A	A	B	B
Excalibur_c11258_1700		IWB21832	1A	0.512	1A	18.05							A	B	B	A	A	B	A	A	A	A	A	A	A	B	A	B	A	B	B	A	B	B	B	A	U	B	U	A	A	B	A	B	B	A	A	B	B
BS00065168_51		IWB9473	1A	0.679	1A	17.69			1B	1.58784			A	B	B	A	A	B	A	A	A	A	A	A	A	B	A	B	A	B	B	A	B	B	B	A	U	B	A	A	A	B	A	B	B	A	A	B	B
Excalibur_c21176_117		IWB23597	1A	0.848									A	B	B	A	A	B	U	A	A	A	A	A	A	B	A	B	A	B	B	A	B	B	B	A	A	B	U	A	A	B	A	B	B	A	A	B	B
wsnp_Ex_c10657_17376448		IWA1376	1A	1.017	1A	13.15							A	B	B	A	A	B	A	A	A	A	A	A	A	B	A	B	A	B	B	A	B	B	B	A	U	B	A	A	A	B	A	B	B	A	A	B	B
Excalibur_c35316_154		IWB25590	1A	1.182	1A	20.78							A	B	B	A	A	B	A	A	A	A	A	A	A	B	A	B	A	B	B	A	B	B	B	A	B	B	A	A	A	B	A	B	B	A	A	B	B
Tdurum_contig42405_197		IWB71109	1A	1.346	1A	14.69							A	B	B	A	A	B	A	A	A	A	A	A	A	B	A	B	A	B	B	A	B	B	B	A	B	B	A	A	A	B	A	B	B	A	A	B	B
BobWhite_c4246_367		IWB3240	1A	1.511	1A	18.05							A	B	B	A	A	B	A	A	A	A	A	A	A	B	A	B	A	B	B	A	B	B	B	A	A	B	A	A	A	B	A	B	B	A	A	B	B
TA001286-0611-w	TG2028	IWB65373	1A	2.591	1A	24.33	1A	1.7					A	B	B	A	A	B	A	A	A	B	A	A	A	B	A	B	A	B	B	A	B	B	B	A	B	U	A	A	A	B	A	B	B	A	A	B	B
BS00059424_51		IWB8777	1A	3.126	1A	22.23							A	B	B	A	A	B	A	A	A	B	A	A	A	B	A	B	A	B	B	A	B	B	B	A	U	B	A	A	A	B	A	B	B	A	A	B	B
BS00082567_51		IWB11264	1A	3.126	1A	22.23							A	B	B	A	A	B	A	A	A	B	A	A	A	B	A	B	A	B	B	A	B	B	B	A	A	B	A	A	A	B	A	B	B	A	A	B	B
CAP12_c3074_192	TG03941D	IWB13355	1A	3.126	1A	22.23	1A	2.8					A	B	B	A	A	B	A	A	A	B	A	A	A	B	A	B	A	B	B	A	B	B	B	A	A	B	A	A	A	B	A	B	B	A	A	B	B
BS00059422_51	TG14611A	IWB8776	1A	3.126	1A	22.62	1A	0.6					A	B	B	A	A	B	A	A	A	B	A	A	A	B	A	B	A	B	B	A	B	B	B	A	U	B	A	A	A	B	A	B	B	A	A	B	B
Kukri_c22349_754		IWB42635	1A	5.833	1A	22.23							A	B	B	A	A	B	A	A	A	B	A	A	A	B	A	B	A	B	B	A	B	B	B	A	A	B	A	A	B	B	A	B	B	A	A	B	B
Kukri_rep_c102231_265	TG41191A	IWB48747	1A	5.833	1A	22.23	1A	7.3					A	B	B	A	A	B	A	A	A	B	A	A	A	B	A	B	A	B	B	A	B	B	B	A	U	B	A	A	B	B	A	B	B	A	A	B	B
Excalibur_c2868_451		IWB24740	1A	5.967	1A	22.23							A	B	B	A	A	B	A	A	A	B	A	A	A	B	A	B	A	B	B	A	B	B	B	A	U	B	A	A	B	B	A	B	B	A	A	B	B
RAC875_c30399_406		IWB56469	1A	6.103									A	B	B	A	A	B	A	A	A	B	A	A	A	B	A	B	A	B	B	A	B	B	B	A	U	B	A	A	A	B	A	B	B	A	A	B	B
GENE-1118_58		IWB32244	1A	6.246	1A	22.23							A	B	B	A	A	B	A	A	A	B	A	A	A	B	A	B	A	B	B	A	B	B	B	A	U	B	A	A	A	B	A	B	B	A	A	B	B
BobWhite_c39996_126		IWB3087	1A	12.128	1A	35.28							A	B	B	A	A	B	A	A	A	B	A	A	A	B	A	B	A	B	B	A	B	B	B	A	U	B	A	A	B	B	A	B	B	A	A	B	B
BS00022943_51		IWB7333	1A	12.395	1A	40.18			1A	195.58			A	B	B	A	A	B	A	A	A	B	A	A	A	B	A	B	A	B	B	A	B	B	B	A	U	B	A	A	B	B	A	B	B	A	A	B	B
BS00010128_51		IWB6172	1A	12.711	1A	35.78							A	B	B	A	A	B	A	A	A	B	A	A	A	B	A	B	A	B	B	A	B	B	B	A	B	B	A	A	B	B	A	B	B	A	A	B	B
GENE-4120_155		IWB33789	1A	12.711	1A	30.93							A	B	B	A	A	B	A	A	A	B	A	A	A	B	A	B	A	B	B	A	B	B	B	A	B	B	A	A	B	B	A	B	B	A	A	B	B
Tdurum_contig68827_61		IWB73129	1A	13.039	1A	40.18			1A	195.58			A	B	B	A	A	B	A	A	A	B	A	A	A	B	A	B	A	B	B	A	B	B	B	A	U	B	A	A	B	B	A	B	B	A	A	B	B
BS00109985_51		IWB12453	1A	13.288									A	B	B	A	A	B	A	A	A	B	A	A	A	B	A	B	A	B	B	A	B	B	B	A	U	B	A	A	B	B	A	B	B	A	A	B	B
BS00074511_51		IWB10746	1A	13.53	1A	43.23			1A	195.58			A	B	B	A	A	B	A	A	A	B	A	A	A	B	A	B	A	B	B	A	B	B	B	A	U	B	A	A	B	B	A	B	B	A	A	B	B
Kukri_c29655_239		IWB43759	1A	13.767	1A	43.23							A	B	B	A	A	B	A	A	A	B	A	A	A	B	A	B	A	B	B	A	B	B	B	A	U	B	A	A	B	B	A	B	B	A	A	B	B
BobWhite_c39996_85		IWB3088	1A	14.003	1A	35.28							A	B	B	A	A	B	A	A	A	B	A	A	A	B	A	B	A	B	B	A	B	B	B	A	U	B	A	A	B	B	A	B	B	A	A	B	B
Excalibur_c71158_54		IWB28577	1A	14.226	1A	33.22			1A	193.98			A	B	B	A	A	B	A	A	A	B	A	A	A	B	A	B	A	B	B	A	B	B	B	A	U	B	A	A	B	B	A	B	B	A	A	B	B
wsnp_Ex_c57982_59470152		IWA4351	1A	14.427	1A	33.48			1A	206.91			A	B	B	A	A	B	A	A	A	B	A	A	A	B	A	B	A	B	B	A	B	B	B	A	U	B	A	A	B	B	A	B	B	A	A	B	B
wsnp_Ku_c183_358844		IWA6649	1A	14.618	1A	33.48			1A	206.91			A	B	B	A	A	B	A	A	A	B	A	A	A	B	A	B	A	B	B	A	B	B	B	A	U	B	A	A	B	B	A	B	B	A	A	B	B
Kukri_c32052_171		IWB44057	1A	14.801	1A	30.93			1A	195.58			A	B	B	A	A	B	A	A	A	B	A	A	A	B	A	B	A	B	B	A	B	B	B	A	U	B	A	A	B	B	A	B	B	A	A	B	B
Excalibur_c9676_163		IWB29562	1A	14.937	1A	35.28			1A	206.91			A	B	B	A	A	B	A	A	A	B	A	A	A	B	A	B	A	B	B	A	B	B	B	A	A	B	A	A	B	B	A	B	B	A	A	B	B
Excalibur_c5139_198		IWB27228	1A	14.937	1A	35.78							A	B	B	A	A	B	A	A	A	B	A	A	A	B	A	B	A	B	B	A	B	B	B	A	A	B	A	A	B	B	A	B	B	A	A	B	B
Excalibur_c82557_201		IWB29039	1A	14.937	1A	30.65							A	B	B	A	A	B	A	A	A	B	A	A	A	B	A	B	A	B	B	A	B	B	B	A	A	B	A	A	B	B	A	B	B	A	A	B	B
IAAV7479		IWB35349	1A	14.937	1A	39.32							A	B	B	A	A	B	A	A	A	B	A	A	A	B	A	B	A	B	B	A	B	B	B	A	A	B	A	A	B	B	A	B	B	A	A	B	B
BS00010039_51		IWB6155	1A	15.204	1A	34.27							A	B	B	A	A	B	A	A	A	B	A	A	A	B	A	B	A	B	B	A	B	B	B	A	A	B	A	A	B	B	A	B	B	A	A	B	B
Excalibur_c1358_794		IWB22291	1A	15.204	1A	46.44					1A	0	A	B	B	A	A	B	A	A	A	B	A	A	A	B	A	B	A	B	B	A	B	B	B	A	A	B	A	A	B	B	A	B	B	A	A	B	B
BS00076278_51		IWB10867	1A	15.204	1A	32.72							A	B	B	A	A	B	A	A	A	B	A	A	A	B	A	B	A	B	B	A	B	B	B	A	A	B	A	A	B	B	A	B	B	A	A	B	B
Tdurum_contig46413_680		IWB71687	1A	15.204	1A	32.52			1A	193.98			A	B	B	A	A	B	A	A	A	B	A	A	A	B	A	B	A	B	B	A	B	B	B	A	A	B	A	A	B	B	A	B	B	A	A	B	B
Kukri_c1977_1940		IWB42196	1A	15.392	1A	32.03			1A	193.98			A	B	B	A	A	B	A	A	A	B	A	A	A	B	A	B	A	B	B	A	B	B	B	A	U	B	A	A	B	B	A	B	B	A	A	B	B
Jagger_c6846_109		IWB36707	1A	15.654	1A	39.32							A	B	B	A	A	B	A	A	A	B	A	A	A	B	A	B	A	B	B	A	B	B	B	A	U	B	A	A	B	B	A	B	B	A	A	B	B
IAAV8297		IWB35459	1A	15.922	1A	32.72							A	B	B	A	A	B	A	A	A	B	A	A	A	B	A	B	A	B	B	A	B	B	B	A	U	B	A	A	B	B	A	B	B	A	A	B	B
BS00025755_51		IWB7590	1A	16.191	1A	32.52							A	B	B	A	A	B	A	A	A	B	A	A	A	B	A	B	A	B	B	A	B	B	B	A	U	B	A	A	B	B	A	B	B	A	A	B	B
tplb0053o08_2004		IWB75039	1A	16.459	1A	32.72							A	B	B	A	A	B	A	A	A	B	A	A	A	B	A	B	A	B	B	A	B	B	B	A	U	B	A	A	B	B	A	B	B	A	A	B	B
Kukri_c24962_123		IWB43053	1A	16.727	1A	39.32					1A	10.2653	A	B	B	A	A	B	A	A	A	B	A	A	A	B	A	B	A	B	B	A	B	B	B	A	U	B	A	A	B	B	A	B	B	A	A	B	B
Kukri_c29150_143		IWB43660	1A	16.995	1A	39.32							A	B	B	A	A	B	A	A	A	B	A	A	A	B	A	B	A	B	B	A	B	B	B	A	A	B	A	A	B	B	A	B	B	A	A	B	B
RAC875_c18640_821		IWB54709	1A	17.226	1A	32.72							A	B	B	A	A	B	A	A	A	B	A	A	A	B	A	B	A	B	B	A	B	B	B	A	U	B	A	A	B	B	A	B	B	A	A	B	B
RAC875_rep_c101110_474		IWB61317	1A	17.392	1A	39.32							A	B	B	A	A	B	A	A	A	B	A	A	A	B	A	B	A	B	B	A	B	B	B	A	B	B	A	A	B	B	A	B	B	A	A	B	B
RAC875_rep_c101110_563		IWB61318	1A	17.392	1A	39.32							A	B	B	A	A	B	A	A	A	B	A	A	A	B	A	B	A	B	B	A	B	B	B	A	B	B	A	A	B	B	A	B	B	A	A	B	B
Tdurum_contig43943_1165		IWB71461	1A	19.794	1A	39.32			1A	193.98			A	B	B	A	A	B	A	A	A	B	A	A	A	B	A	B	A	B	B	A	B	B	B	A	B	B	A	A	B	B	A	B	B	A	A	B	B
Excalibur_c9196_313		IWB29371	1A	20.005	1A	39.32			1A	195.58			A	B	B	A	A	B	A	A	A	B	A	A	A	B	A	B	A	B	B	A	B	B	B	A	B	B	A	A	B	B	A	B	B	A	A	B	B
CAP8_c2448_355		IWB14618	1A	20.118	1A	39.32			1A	193.98			A	B	B	A	A	B	A	A	A	B	A	A	A	B	A	B	A	B	B	A	B	B	B	A	B	B	A	A	B	B	A	B	B	A	A	B	B
Excalibur_c26496_352		IWB24448	1A	20.351	1A	54.28							A	B	B	A	A	B	A	A	A	B	A	A	A	B	A	B	A	B	B	A	B	B	B	A	U	B	A	A	B	B	A	B	B	A	A	B	B
CAP11_c2581_302		IWB12795	1A	20.632	1A	37.79			1A	193.98			A	B	B	A	A	B	A	A	A	B	A	A	A	B	A	B	A	B	B	A	B	B	B	A	U	B	A	A	B	B	A	B	B	A	A	B	B
RAC875_c5831_1486		IWB59361	1A	20.75	1A	39.32					1A	11.3682	A	B	B	A	A	B	A	A	A	B	A	A	A	B	A	B	A	B	B	A	B	B	B	A	U	B	A	A	B	B	A	B	B	A	A	B	B
RAC875_c97040_104		IWB61182	1A	20.75	1A	39.65							A	B	B	A	A	B	A	A	A	B	A	A	A	B	A	B	A	B	B	A	B	B	B	A	A	B	A	A	B	B	A	B	B	A	A	B	B
BS00010267_51		IWB6195	1A	20.75	1A	38.32					6B	56.7	A	B	B	A	A	B	A	A	A	B	A	A	A	B	A	B	A	B	B	A	B	B	B	A	A	B	A	A	B	B	A	B	B	A	A	B	B
Excalibur_c21298_515		IWB23623	1A	20.75	1A	38.32							A	B	B	A	A	B	A	A	A	B	A	A	A	B	A	B	A	B	B	A	B	B	B	A	A	B	A	A	B	B	A	B	B	A	A	B	B
Tdurum_contig43943_56		IWB71462	1A	20.75	1A	37.79			1A	193.98			A	B	B	A	A	B	A	A	A	B	A	A	A	B	A	B	A	B	B	A	B	B	B	A	A	B	A	A	B	B	A	B	B	A	A	B	B
Excalibur_c29380_255		IWB24829	1A	20.75	1A	39.32							A	B	B	A	A	B	A	A	A	B	A	A	A	B	A	B	A	B	B	A	B	B	B	A	A	B	A	A	B	B	A	B	B	A	A	B	B
RAC875_c57939_78		IWB59323	1A	20.75	1A	36.28							A	B	B	A	A	B	A	A	A	B	A	A	A	B	A	B	A	B	B	A	B	B	B	A	U	B	A	A	B	B	A	B	B	A	A	B	B
BS00022270_51		IWB6999	1A	21.075	1A	60.43							A	B	B	A	A	B	A	A	A	B	A	A	A	B	A	B	A	B	B	A	B	B	B	A	U	B	A	A	B	B	A	B	B	A	A	B	B
BS00110709_51		IWB12589	1A	21.075	1A	60.43							A	B	B	A	A	B	A	A	A	B	A	A	A	B	A	B	A	B	B	A	B	B	B	A	A	B	A	A	B	B	A	B	B	A	A	B	B
RAC875_c22821_542		IWB55413	1A	21.075	1A	54.28							A	B	B	A	A	B	A	A	A	B	A	A	A	B	A	B	A	B	B	A	B	B	B	A	U	B	A	A	B	B	A	B	B	A	A	B	B
Excalibur_c25175_512		IWB24273	1A	26.203	1A	56.66							A	B	B	A	A	B	A	A	A	B	A	B	A	B	A	B	A	B	B	A	B	B	B	A	A	B	A	A	B	B	A	B	B	A	A	B	B
Excalibur_c58154_84		IWB27788	1A	26.203	1A	56.66							A	B	B	A	A	B	A	A	A	B	A	B	A	B	A	B	A	B	B	A	B	B	B	A	A	B	A	A	B	B	A	B	B	A	A	B	B
wsnp_Ex_c4876_8692783		IWA4033	1A	26.203	1A	54.28			1A	206.91			A	B	B	A	A	B	A	A	A	B	A	B	A	B	A	B	A	B	B	A	B	B	B	A	U	B	A	A	B	B	A	B	B	A	A	B	B
IACX11001		IWB35649	1A	26.342	1A	61.75			1A	193.98			A	B	B	A	A	B	A	A	A	B	A	B	A	B	A	B	A	B	B	A	B	B	B	A	U	B	U	A	B	B	A	B	B	A	A	B	B
Tdurum_contig44809_1626		IWB71545	1A	26.591					1A	193.98			A	B	B	A	A	B	A	A	A	B	A	B	A	B	A	B	A	B	B	A	B	B	B	A	U	B	A	A	B	B	A	B	B	A	A	B	B
wsnp_JD_c7522_8606553		IWA6172	1A	26.852	1A	65.31			1A	193.98			A	B	B	A	A	B	A	A	A	B	A	B	A	B	A	B	A	B	B	A	B	B	B	A	U	B	A	A	B	B	A	B	B	A	A	B	B
Ex_c4876_1221		IWB20818	1A	27.11	1A	61.75			1A	193.98			A	B	B	A	A	B	A	A	A	B	A	B	A	B	A	B	A	B	B	A	B	B	B	A	U	B	A	A	B	B	A	B	B	A	A	B	B
Tdurum_contig42479_3800	TG30921A	IWB71175	1A	27.352	1A	59.83	1A	36.3	1A	193.98			A	B	B	A	A	B	A	A	A	B	A	B	A	B	A	B	A	B	B	A	B	B	B	A	A	B	A	A	B	B	A	B	B	A	A	B	B
Kukri_c2121_2345		IWB42452	1A	27.496	1A	61.75			1A	193.98			A	B	B	A	A	B	A	A	A	B	A	B	A	B	A	B	A	B	B	A	B	B	B	A	B	B	A	A	B	B	A	B	B	A	A	B	B
Kukri_c4126_240		IWB45123	1A	27.615	1A	60.27			1A	206.91			A	B	B	A	A	B	A	A	A	B	A	B	A	B	A	B	A	B	B	A	B	B	B	A	B	B	A	A	B	B	A	B	B	A	A	B	B
BS00023485_51		IWB7493	1A	27.728					1A	193.98			A	B	B	A	A	B	A	A	A	B	A	B	A	B	A	B	A	B	B	A	B	B	B	A	B	B	A	A	B	B	A	B	B	A	A	B	B
Kukri_c2121_1334		IWB42449	1A	27.728	1A	65.31			1A	193.98			A	B	B	A	A	B	A	A	A	B	A	B	A	B	A	B	A	B	B	A	B	B	B	A	B	B	A	A	B	B	A	B	B	A	A	B	B
wsnp_Ex_c7965_13520238	TG32701D	IWA4754	1A	27.728	1A	62.13	1A	36.9	1A	206.91			A	B	B	A	A	B	A	A	A	B	A	B	A	B	A	B	A	B	B	A	B	B	B	A	B	B	A	A	B	B	A	B	B	A	A	B	B
BS00089514_51		IWB11615	1A	27.728	1B	55.38							A	B	B	A	A	B	A	A	A	B	A	B	A	B	A	B	A	B	B	A	B	B	B	A	U	B	A	A	B	B	A	B	B	A	A	B	B
BS00103478_51		IWB12206	1A	27.728	1A	56.66			1A	206.91			A	B	B	A	A	B	A	A	A	B	A	B	A	B	A	B	A	B	B	A	B	B	B	A	U	B	A	A	B	B	A	B	B	A	A	B	B
Ku_c20069_531		IWB38726	1A	28.807	1A	72.7							A	B	B	A	A	B	A	A	A	B	A	B	A	B	A	B	A	B	B	A	B	B	B	A	B	B	A	A	B	B	A	B	B	A	A	B	B
Jagger_c8952_378		IWB36797	1A	29.084					1A	206.91			A	B	B	A	A	B	A	A	A	B	A	B	A	B	A	B	A	B	B	A	B	B	B	A	A	B	A	A	B	B	A	B	B	A	A	B	B
BS00101309_51		IWB12166	1A	29.084	1A	54.28							A	B	B	A	A	B	A	A	A	B	A	B	A	B	A	B	A	B	B	A	B	B	B	A	B	B	A	A	B	B	A	B	B	A	A	B	B
BobWhite_c1265_607		IWB387	1A	29.084	1A	55.72							A	B	B	A	A	B	A	A	A	B	A	B	A	B	A	B	A	B	B	A	B	B	B	A	B	B	A	A	B	B	A	B	B	A	A	B	B
wsnp_Ex_c7252_12453079	TG13381A	IWA4644	1A	29.084	1A	57.43	1A	35.8					A	B	B	A	A	B	A	A	A	B	A	B	A	B	A	B	A	B	B	A	B	B	B	A	B	B	A	A	B	B	A	B	B	A	A	B	B
wsnp_Ku_c5756_10191339	TG3337	IWA7191	1A	29.084	1A	54.28	1A	38					A	B	B	A	A	B	A	A	A	B	A	B	A	B	A	B	A	B	B	A	B	B	B	A	B	B	A	A	B	B	A	B	B	A	A	B	B
wsnp_Ex_c19717_28713417	TG3204	IWA2452	1A	29.084	1A	57.43	1A	35.8					A	B	B	A	A	B	A	A	A	B	A	B	A	B	A	B	A	B	B	A	B	B	B	A	A	B	A	A	B	B	A	B	B	A	A	B	B
IAAV4132		IWB34835	1A	29.084	1A	58.81			1A	193.98			A	B	B	A	A	B	A	A	A	B	A	B	A	B	A	B	A	B	B	A	B	B	B	A	U	B	U	A	B	B	A	B	B	A	A	B	B
BS00081682_51		IWB11203	1A	29.084	1A	57.73							A	B	B	A	A	B	U	A	A	B	A	B	A	B	A	B	A	B	B	A	B	B	B	A	U	B	A	A	B	B	A	B	B	A	A	B	B
Ex_c17168_1216		IWB19979	1A	29.084	1A	118.32					1A	65.579	A	B	B	A	A	B	A	A	A	B	A	U	A	B	A	B	A	B	B	A	B	B	B	A	U	B	A	A	B	B	A	B	B	A	A	B	B
Kukri_rep_c108031_378		IWB49309	1A	29.084	1A	65.31							A	B	B	A	A	B	A	A	A	B	A	B	A	B	A	B	A	B	B	A	B	B	B	A	U	B	A	A	B	B	A	B	B	A	A	B	B
Excalibur_c20777_315		IWB23538	1A	29.185	1A	65.96							A	B	B	A	A	B	A	A	A	B	A	B	A	B	A	B	A	B	B	A	B	B	B	A	U	B	A	A	B	B	A	B	B	A	A	B	B
Tdurum_contig83113_134		IWB73615	1A	29.295	1A	62.27							A	B	B	A	A	B	A	A	A	B	A	B	A	B	A	B	A	B	B	A	B	B	B	A	U	B	A	A	B	B	A	B	B	A	A	B	B
Tdurum_contig75476_167		IWB73271	1A	29.527	1A	30.65							A	B	B	A	A	B	A	A	A	B	A	B	A	B	A	B	A	B	B	A	B	B	B	A	A	B	A	A	B	B	A	B	B	A	A	B	B
RAC875_c23587_271		IWB55537	1A	29.527	1A	57.73							A	B	B	A	A	B	A	A	A	B	A	B	A	B	A	B	A	B	B	A	B	B	B	A	A	B	A	A	B	B	A	B	B	A	A	B	B
BS00079071_51		IWB11053	1A	29.727	1A	58.01							A	B	B	A	A	B	A	A	A	B	A	B	A	U	A	B	A	B	B	A	B	B	B	A	U	U	A	A	B	B	A	U	B	A	A	B	B
Kukri_c11891_1015		IWB40692	1A	31.137	1A	59.83							A	B	B	A	A	B	A	A	A	B	A	B	A	B	A	B	A	B	B	A	B	B	B	A	B	B	A	A	B	B	A	B	B	A	A	B	B
BS00026453_51		IWB7627	1A	31.355	1A	68.98							A	B	U	A	A	B	A	A	A	B	A	B	A	B	A	B	A	B	B	A	B	U	B	A	U	B	A	A	B	B	A	B	U	A	A	B	B
BS00077492_51		IWB10932	1A	31.498	1A	58.81					1A	22.1425	A	B	B	A	A	B	A	A	A	B	A	B	A	B	A	B	A	B	B	A	B	B	B	A	A	B	A	A	B	B	A	B	B	A	A	B	B
BS00003761_51		IWB5889	1A	33.414	1A	68.28							A	B	B	A	A	B	A	A	A	B	A	B	A	B	A	B	A	B	B	A	B	B	B	A	A	B	A	A	B	B	A	B	B	A	A	B	B
Tdurum_contig61492_684		IWB72794	1A	33.414	1A	68.28							A	B	B	A	A	B	A	A	A	B	A	B	A	B	A	B	A	B	B	A	B	B	B	A	A	B	A	A	B	B	A	B	B	A	A	B	B
wsnp_BF200531A_Ta_2_1		IWA414	1A	33.554	1A	66.67							A	B	B	U	A	B	A	A	A	B	A	B	A	B	A	B	A	B	B	A	B	B	B	A	U	B	A	A	B	B	A	B	B	A	A	B	B
IACX5892		IWB36053	1A	34.032	1A	68.28							A	B	B	A	A	B	A	A	A	B	A	B	A	B	A	B	A	B	B	A	B	B	B	A	B	B	A	A	B	B	A	B	B	A	A	B	B
BS00064536_51		IWB9312	1A	34.271	1A	68.48							A	B	B	A	A	B	A	A	A	B	A	B	A	B	A	B	A	B	B	A	B	B	B	A	U	B	A	A	B	B	A	B	B	A	A	B	B
Tdurum_contig61492_458		IWB72793	1A	34.62	1A	68.28							A	B	B	A	A	B	A	A	A	B	A	B	A	B	A	B	A	B	B	A	B	B	B	A	A	B	A	A	B	B	A	B	B	A	A	B	B
RAC875_c54245_88		IWB59016	1A	34.868	1A	68.28							A	B	B	A	A	B	A	A	A	B	A	B	A	B	A	B	A	B	B	A	B	B	B	A	A	B	A	A	B	B	A	B	B	A	A	B	B
BS00003802_51		IWB5896	1A	35.131	1A	68.28							A	B	B	A	A	B	A	A	A	B	A	B	A	B	A	B	A	B	B	A	B	B	B	A	A	B	A	A	B	B	A	B	B	A	A	B	B
BS00107852_51		IWB12336	1A	41.767	1A	78.81							A	B	B	A	A	B	A	A	A	U	A	B	A	U	A	B	A	U	B	A	B	B	U	B	U	U	A	A	B	U	A	B	B	A	A	B	B
Kukri_rep_c81545_195		IWB50401	1A	41.974	1A	81.33							A	B	B	A	A	B	A	A	A	B	A	B	A	B	A	B	A	B	B	A	B	B	B	B	A	B	A	A	B	B	A	B	B	A	A	B	B
wsnp_Ex_c64327_63176640	TG32611A	IWA4506	1A	41.974	1A	82.05	1A	49.3					A	B	B	A	A	B	A	A	A	B	A	B	A	B	A	B	A	B	B	A	B	B	B	B	A	B	A	A	B	B	A	B	B	A	A	B	B
BS00022458_51		IWB7096	1A	42.98	1A	84.65							A	B	B	A	A	B	A	A	A	B	A	U	A	B	A	B	A	B	B	A	U	B	U	B	U	U	A	A	B	U	A	B	B	A	A	U	A
BS00063263_51		IWB9029	1A	43.655	1A	81.66			1B	60.2128			A	B	B	A	A	B	A	A	A	B	A	B	A	B	A	B	A	B	B	A	B	B	B	B	U	B	A	A	B	B	A	B	B	A	A	B	B
IAAV3168		IWB34675	1A	44.749	1A	81.33							A	B	B	A	A	B	A	A	A	B	A	B	A	B	A	B	A	B	B	A	B	B	B	B	B	B	A	A	B	B	A	B	B	A	A	B	B
CAP7_c4833_55		IWB14138	1A	56.053	1A	86.75							A	B	B	A	A	B	A	B	A	B	A	B	A	B	A	A	A	B	B	B	B	B	A	B	U	B	A	A	B	B	A	B	B	A	A	B	A
CAP7_c4833_141	TG34291A	IWB14137	1A	56.27	1A	85.98	1A	55.5					A	B	B	A	A	B	A	B	A	B	A	B	A	B	A	A	A	B	B	B	B	B	A	B	U	B	A	A	B	B	A	B	B	A	A	B	A
BS00078982_51	TG11901A	IWB11044	1A	56.425	1A	84.65	1A	56					A	B	B	A	A	B	A	B	A	B	A	B	A	B	A	A	A	B	B	B	B	B	A	B	U	B	A	A	B	B	A	B	B	A	A	B	A
RAC875_c16820_419		IWB54363	1A	56.425	1A	88.86							A	B	B	A	A	B	A	B	A	B	A	B	A	U	A	U	A	B	B	B	B	B	A	B	U	B	A	A	B	B	U	B	B	A	A	B	A
Kukri_c16098_95		IWB41525	1A	56.425	1A	85.98							A	B	B	A	A	B	A	B	A	B	A	B	A	B	A	A	A	B	B	B	B	B	A	B	B	B	A	A	B	B	A	B	B	A	A	B	A
wsnp_Ex_c10783_17554146	TG09951A	IWA1387	1A	56.425	1A	85.98	1A	55.5					A	B	B	A	A	B	A	B	A	B	A	B	A	B	A	A	A	B	B	B	B	B	A	B	B	B	A	A	B	B	A	B	B	A	A	B	A
wsnp_Ku_rep_c101175_88380491		IWA7377	1A	56.425	1A	87.4							A	B	B	A	A	B	A	B	A	B	A	B	A	B	A	A	A	B	B	B	B	B	A	B	B	B	A	A	B	B	A	B	B	A	A	B	A
RAC875_c1825_188	TG19171A	IWB54638	1A	56.425	1A	86.75	1A	56					A	B	B	A	A	B	A	B	A	B	A	B	A	B	A	A	A	B	B	B	B	B	A	B	A	B	A	A	B	B	A	B	B	A	A	B	A
wsnp_Ex_c48087_53105842	TG32431A	IWA4008	1A	56.535	1A	86.75	1A	56.6					A	B	B	A	A	B	A	B	A	B	A	B	A	B	A	A	A	B	B	B	B	B	A	B	U	B	A	A	B	B	A	B	B	A	A	B	A
BS00105601_51	TG15211A	IWB12251	1A	56.714	1A	84.65	1A	56					A	B	B	A	A	B	A	B	A	B	A	B	A	B	A	A	A	B	B	B	B	B	A	B	U	B	A	A	B	B	A	B	B	A	A	B	A
IAAV5252		IWB34995	1A	59.777	1A	92.58							A	B	B	A	A	B	A	B	A	B	A	B	A	A	A	A	A	B	B	B	B	B	A	B	B	A	A	B	B	B	A	B	B	A	A	A	A
wsnp_Ra_c26191_35761997		IWA7796	1A	59.777	1A	92.58							A	B	B	A	A	B	A	B	A	B	A	B	A	A	A	A	A	B	B	B	B	B	A	B	B	A	A	B	B	B	A	B	B	A	A	A	A
Kukri_rep_c102900_1715		IWB48819	1A	60.049	1A	93.34							A	B	B	A	A	B	A	B	A	B	A	B	A	A	A	A	A	B	B	B	B	B	A	B	B	A	A	B	B	B	A	B	B	A	A	A	A
Tdurum_contig8382_300	TG44131A	IWB73652	1A	60.049	1A	92.58	1A	59.4					A	B	B	A	A	B	A	B	A	B	A	B	A	A	A	A	A	B	B	B	B	B	A	B	B	A	A	B	B	B	A	B	B	A	A	A	A
Kukri_c31964_56	TG40583A	IWB44046	1A	60.049	1A	92.58	1A	59.4					A	B	B	A	A	B	A	B	A	B	A	B	A	A	A	A	A	B	B	B	B	B	A	B	B	A	A	B	B	B	A	B	B	A	A	A	A
Kukri_c31964_109		IWB44045	1A	60.049	1A	98.74							A	B	B	A	A	B	A	B	A	B	A	B	A	A	A	A	A	B	B	B	B	B	A	B	B	A	A	B	B	B	A	B	B	A	A	A	A
RFL_Contig2160_524		IWB63846	1A	60.049									A	B	B	A	A	B	A	B	A	B	A	B	A	A	A	A	A	B	B	B	B	B	A	B	B	A	A	B	B	B	A	B	B	A	A	A	A
RAC875_c9700_989	TG47977A	IWB61179	1A	60.608	1A	115.58	1A	62.2					A	B	B	B	A	B	A	B	A	B	A	B	A	A	A	A	A	B	B	B	B	B	A	B	B	A	A	B	B	B	A	B	B	A	A	A	A
Excalibur_c11047_160		IWB21785	1A	60.608	7A	478.85							A	B	B	B	A	B	A	B	A	B	A	B	A	A	A	A	A	B	B	B	B	B	A	B	B	A	A	B	B	B	A	B	B	A	A	A	A
BS00065906_51		IWB9666	1A	60.95	1A	88.01							A	B	B	B	A	B	A	B	A	B	A	B	A	A	A	A	A	B	B	B	B	B	A	B	B	A	A	B	B	B	A	B	B	A	A	A	A
Excalibur_rep_c100567_692		IWB29693	1A	61.061	1A	89.91							A	B	B	B	A	B	A	B	A	B	A	B	A	A	A	A	A	B	B	B	B	B	A	B	B	A	A	B	B	B	A	B	B	A	A	A	A
GENE-0507_285		IWB31932	1A	61.233	1A	97.82							A	B	B	B	A	B	A	B	A	B	A	B	A	A	A	A	A	B	B	B	B	B	A	B	B	A	A	B	B	B	A	B	B	A	A	A	A
BS00084022_51	TG37611A	IWB11335	1A	61.453	1A	94.32	1A	62.8					A	B	B	B	A	B	A	B	A	B	A	B	A	A	A	A	A	B	B	B	B	B	A	B	B	A	A	B	B	B	A	B	B	A	A	A	A
RAC875_rep_c107325_644		IWB61685	1A	61.859	1A	97.61							A	B	B	B	A	B	A	B	A	B	A	B	A	A	A	A	A	B	B	B	B	B	A	B	B	A	A	B	B	B	A	B	B	A	A	A	A
GENE-0002_856	TG16481A	IWB31602	1A	62.126	1A	97.74	1A	62.2					A	B	B	B	A	B	A	B	A	B	A	B	A	A	A	A	A	B	B	B	B	B	A	B	B	A	A	B	B	B	A	B	B	A	A	A	A
BobWhite_c4499_153	TG13851A	IWB3419	1A	62.539	1A	94.32	1A	63.3					A	B	B	B	A	B	A	B	A	B	A	B	A	A	A	A	A	B	B	B	B	B	A	B	B	A	A	B	B	B	A	B	B	A	A	A	A
Tdurum_contig13946_241	TG20581A	IWB68106	1A	63.967	1A	99.45	1A	65	1A	148.835			A	B	B	B	A	B	A	B	A	B	A	B	A	A	A	A	A	B	B	B	B	B	A	B	B	A	A	B	B	B	A	B	B	A	A	A	A
Ra_c22663_367	TG4141	IWB51485	1A	63.967	1A	102.89	1A	65	1A	148.835			A	B	B	B	A	B	A	B	A	B	A	B	A	A	A	A	A	B	B	B	B	B	A	B	B	A	A	B	B	B	A	B	B	A	A	A	A
Kukri_c46010_872		IWB45604	1A	63.967	1A	115.58							A	B	B	B	A	B	A	B	A	B	A	B	A	A	A	A	A	B	B	B	B	B	A	B	B	A	A	B	B	B	A	B	B	A	A	A	A
IACX1465		IWB35755	1A	64.263	1A	104.23							A	B	B	B	A	B	A	B	A	B	A	B	A	A	A	A	A	B	B	B	B	B	A	B	B	A	A	B	B	B	A	B	B	A	A	A	A
Excalibur_c7237_1208		IWB28624	1A	65.002	1A	103.53					1A	44.2849	A	B	B	B	A	B	A	B	A	B	A	B	A	A	A	A	A	B	B	B	B	B	A	B	B	A	A	B	B	B	A	B	B	A	A	A	A
Kukri_c7579_443		IWB47651	1A	65.117	1A	103.48			1A	148.168			A	B	B	B	A	B	A	B	A	B	A	B	A	A	A	A	A	B	B	B	B	B	A	B	B	A	A	B	B	B	A	B	B	A	A	A	A
RAC875_c14066_452	TG0728	IWB53853	1A	65.117	1A	110.93	1A	66.1	1A	148.168	1A	44.6243	A	B	B	B	A	B	A	B	A	B	A	B	A	A	A	A	A	B	B	B	B	B	A	B	B	A	A	B	B	B	A	B	B	A	A	A	A
Excalibur_c7237_1084	TG26761A	IWB28622	1A	65.117	1A	103.53	1A	66.1			1A	44.6243	A	B	B	B	A	B	A	B	A	B	A	B	A	A	A	A	A	B	B	B	B	B	A	B	B	A	A	B	B	B	A	B	B	A	A	A	A
Kukri_c7579_559		IWB47652	1A	65.117	1A	103.48			1A	148.168	1A	44.6243	A	B	B	B	A	B	A	B	A	B	A	B	A	A	A	A	A	B	B	B	B	B	A	B	B	A	A	B	B	B	A	B	B	A	A	A	A
RAC875_c10090_963	TG01051A	IWB52903	1A	65.117	1A	103.48	1A	66.1	1A	146.844	1A	44.6243	A	B	B	B	A	B	A	B	A	B	A	B	A	A	A	A	A	B	B	B	B	B	A	B	B	A	A	B	B	B	A	B	B	A	A	A	A
RAC875_rep_c111911_116		IWB62099	1A	65.117	1A	103.48			1A	146.844	1A	44.6243	A	B	B	B	A	B	A	B	A	B	A	B	A	A	A	A	A	B	B	B	B	B	A	B	B	A	A	B	B	B	A	B	B	A	A	A	A
Ku_c44068_601		IWB39451	1A	65.117	1A	101.59							A	B	B	B	A	B	A	B	A	B	A	B	A	A	A	A	A	B	B	B	B	B	A	B	B	A	A	B	B	B	A	B	B	A	A	A	A
Excalibur_c75270_566		IWB28744	1A	67.403	1D	93.2							A	B	B	B	A	B	A	U	A	B	B	U	A	A	A	A	A	B	B	U	U	B	A	U	U	A	A	U	B	U	A	B	U	A	A	A	A
IAAV8987		IWB35572	1A	67.538	1A	108.24							A	B	B	B	A	B	A	B	A	B	B	B	A	A	A	A	A	B	B	B	B	B	A	B	B	A	A	B	B	B	A	B	B	A	A	A	A
Tdurum_contig9199_714	TG09521A	IWB73772	1A	67.686	1A	109.1	1A	66.7					A	B	B	B	A	B	A	B	A	B	B	B	A	A	A	A	A	B	B	B	B	B	A	B	B	A	A	B	B	B	A	B	B	A	A	A	A
Ku_c11769_252		IWB38267	1A	67.855	1A	108.55			1A	144.842			A	B	B	B	A	B	A	B	A	B	B	B	A	A	A	A	A	B	B	B	B	B	A	B	B	A	A	B	B	B	A	B	B	A	A	A	A
Excalibur_rep_c114535_55		IWB30674	1A	68.031	1A	108.55							A	B	B	B	A	B	A	B	A	B	B	B	A	A	A	A	A	B	B	B	B	B	A	B	B	A	A	B	B	B	A	B	B	A	A	A	A
Ra_c27593_460	TG12671A	IWB51667	1A	68.214	1A	109.15	1A	67.2					A	B	B	B	A	B	A	B	A	B	B	B	A	A	A	A	A	B	B	B	B	B	A	B	B	A	A	B	B	B	A	B	B	A	A	A	A
Tdurum_contig47183_205		IWB71771	1A	68.403	1A	106.34							A	B	B	B	A	B	A	B	A	B	B	B	A	A	A	A	A	B	B	B	B	B	A	B	B	A	A	B	B	B	A	B	B	A	A	A	A
Ex_c36987_538		IWB20587	1A	72.906	1A	114.81							A	B	B	B	A	B	A	B	A	B	B	B	A	A	A	A	A	B	B	B	B	B	A	B	B	A	A	B	B	B	A	B	B	A	A	A	A
GENE-0106_229		IWB31671	1A	75.85	1A	140.43							A	B	B	B	A	B	A	B	A	B	B	B	A	A	A	A	A	B	B	B	B	B	A	B	B	A	A	B	B	B	A	B	B	A	A	A	A
RAC875_c15426_1713		IWB54092	1A	76.92	1A	163.04							A	B	B	B	A	B	A	B	A	B	B	B	A	A	A	A	A	B	B	B	B	B	A	B	B	A	A	B	B	B	A	B	B	A	A	A	A
Ex_c25689_1606	TG25981A	IWB20307	1A	77.321	1A	141.6	1A	70.6					A	B	B	B	A	B	A	B	A	B	B	B	A	A	A	A	A	B	B	B	B	B	A	B	B	A	A	B	B	B	A	B	B	A	A	A	A
Ex_c14361_506		IWB19845	1A	77.484	1A	141.65							A	B	B	B	A	B	A	B	A	B	B	B	A	A	A	A	A	B	B	B	B	B	A	B	B	A	A	B	B	B	A	B	B	A	A	A	A
Ex_c4242_1442		IWB20695	1A	77.649	1A	141.6							A	B	B	B	A	B	A	B	A	B	B	B	A	A	A	A	A	B	B	B	B	B	A	B	B	A	A	B	B	B	A	B	B	A	A	A	A
wsnp_Ex_c10257_16825240	TG31781A	IWA1307	1A	77.848	1A	141.6	1A	70.6			1A	95.4416	A	B	B	B	A	B	A	B	A	B	B	B	A	A	A	A	A	B	B	B	B	B	A	B	B	A	A	B	B	B	A	B	B	A	A	A	A
RFL_Contig530_2305	TG20191A	IWB64970	1A	78.044	1A	141.6	1A	71.1					A	B	B	B	A	B	A	B	A	B	B	B	A	A	A	A	A	B	B	B	B	B	A	B	B	A	A	B	B	B	A	B	B	A	A	A	A
Ra_c54249_1031		IWB52241	1A	78.192	1A	141.6							A	B	B	B	A	B	A	B	A	B	B	B	A	A	A	A	A	B	B	B	B	B	A	B	B	A	A	B	B	B	A	B	B	A	A	A	A
IAAV5939		IWB35117	1A	78.324	1A	141.6							A	B	B	B	A	B	A	B	A	B	B	B	A	A	A	A	A	B	B	B	B	B	A	B	B	A	A	B	B	B	A	B	B	A	A	A	A
Ex_c4121_1205		IWB20671	1A	78.455	1A	141.65							A	B	B	B	A	B	A	B	A	B	B	B	A	A	A	A	A	B	B	B	B	B	A	B	B	A	A	B	B	B	A	B	B	A	A	A	A
Ex_c25689_1603		IWB20306	1A	78.587	1A	141.6							A	B	B	B	A	B	A	B	A	B	B	B	A	A	A	A	A	B	B	B	B	B	A	B	B	A	A	B	B	B	A	B	B	A	A	A	A
Ku_c23960_333	TG17391A	IWB38877	1A	78.719	1A	141.6	1A	70.6			1A	95.781	A	B	B	B	A	B	A	B	A	B	B	B	A	A	A	A	A	B	B	B	B	B	A	B	B	A	A	B	B	B	A	B	B	A	A	A	A
Ex_c12584_2014	TG25941A	IWB19752	1A	78.85	1A	141.6	1A	70.6					A	B	B	B	A	B	A	B	A	B	B	B	A	A	A	A	A	B	B	B	B	B	A	B	B	A	A	B	B	B	A	B	B	A	A	A	A
TA004725-0348		IWB65878	1A	78.982	1A	141.6							A	B	B	B	A	B	A	B	A	B	B	B	A	A	A	A	A	B	B	B	B	B	A	B	B	A	A	B	B	B	A	B	B	A	A	A	A
TA002594-0782	TG3521	IWB65579	1A	79.113	1A	140.24	1A	71.1					A	B	B	B	A	B	A	B	A	B	B	B	A	A	A	A	A	B	B	B	B	B	A	B	B	A	A	B	B	B	A	B	B	A	A	A	A
JD_c63991_766		IWB37712	1A	79.245	1A	141.6							A	B	B	B	A	B	A	B	A	B	B	B	A	A	A	A	A	B	B	B	B	B	A	B	B	A	A	B	B	B	A	B	B	A	A	A	A
Kukri_c23350_433		IWB42791	1A	79.377	1A	141.6							A	B	B	B	A	B	A	B	A	B	B	B	A	A	A	A	A	B	B	B	B	B	A	B	B	A	A	B	B	B	A	B	B	A	A	A	A
IACX219		IWB35842	1A	79.508	1A	141.6							A	B	B	B	A	B	A	B	A	B	B	B	A	A	A	A	A	B	B	B	B	B	A	B	B	A	A	B	B	B	A	B	B	A	A	A	A
Tdurum_contig99671_174		IWB74073	1A	79.625	1A	141.6							A	B	B	B	A	B	A	B	A	B	B	B	A	A	A	A	A	B	B	B	B	B	A	B	B	A	A	B	B	B	A	B	B	A	A	A	A
Tdurum_contig43203_318		IWB71397	1A	79.625	1A	141.6							A	B	B	B	A	B	A	B	A	B	B	B	A	A	A	A	A	B	B	B	B	B	A	B	B	A	A	B	B	B	A	B	B	A	A	A	A
BobWhite_c37802_547		IWB2927	1A	79.625	1A	141.6							A	B	B	B	A	B	A	B	A	B	B	B	A	A	A	A	A	B	B	B	B	B	A	B	B	A	A	B	B	B	A	B	B	A	A	A	A
wsnp_Ku_c4018_7333828	TG48611A	IWA7021	1A	79.794	1A	157.09	1A	72.3					A	B	B	B	A	B	A	B	A	B	B	B	A	A	A	A	A	B	B	B	B	B	A	B	B	A	A	B	B	B	A	B	B	A	A	A	A
Kukri_c22434_513		IWB42650	1A	80.028	1A	158.12					1A	98.7503	A	B	B	B	A	B	A	B	A	B	B	B	A	A	A	A	A	B	B	B	B	B	A	B	B	A	A	B	B	B	A	B	B	A	A	A	A
wsnp_Ex_c572_1138503	TG32561A	IWA4327	1A	80.269	1A	158.12	1A	71.7					A	B	B	B	A	B	A	B	A	B	B	B	A	A	A	A	A	B	B	B	B	B	A	B	B	A	A	B	B	B	A	B	B	A	A	A	A
RFL_Contig2270_2610		IWB63891	1A	80.517	1A	160.58							A	B	B	B	A	B	A	B	A	B	B	B	A	A	A	A	A	B	B	B	B	B	A	B	B	A	A	B	B	B	A	B	B	A	A	A	A
Ra_c2895_591	TG34901A	IWB51724	1A	80.769	1A	158.12	1A	72.3					A	B	B	B	A	B	A	B	A	B	B	B	A	A	A	A	A	B	B	B	B	B	A	B	B	A	A	B	B	B	A	B	B	A	A	A	A
Excalibur_c13489_867		IWB22274	1A	81.02	1A	158.12							A	B	B	B	A	B	A	B	A	B	B	B	A	A	A	A	A	B	B	B	B	B	A	B	B	A	A	B	B	B	A	B	B	A	A	A	A
wsnp_Ex_c572_1138770	TG22871A	IWA4328	1A	81.271	1A	158.12	1A	72.3					A	B	B	B	A	B	A	B	A	B	B	B	A	A	A	A	A	B	B	B	B	B	A	B	B	A	A	B	B	B	A	B	B	A	A	A	A
tplb0041a22_935	TG31501A	IWB74701	1A	81.525	1A	160.75	1A	68.3					A	B	B	B	A	B	A	B	A	B	B	B	A	A	A	A	A	B	B	B	B	B	A	B	B	A	A	B	B	B	A	B	B	A	A	A	A
wsnp_Ra_c2895_5488879		IWA7824	1A	81.835	1A	158.12					1A	99.5138	A	B	B	B	A	B	A	B	A	B	B	B	A	A	A	A	A	B	B	B	B	B	A	B	B	A	U	B	B	B	A	B	B	A	A	A	A
IAAV7203	TG27551A	IWB35308	1A	81.835	1A	158.12	1A	72.3					A	B	B	B	A	B	A	B	A	B	B	B	A	A	A	A	A	B	B	B	B	B	A	B	B	A	A	B	B	B	A	B	B	A	A	A	A
wsnp_Ex_c572_1138339	TG22861A	IWA4326	1A	81.835	1A	158.12	1A	72.3					A	B	B	B	A	B	A	B	A	B	B	B	A	A	A	A	A	B	B	B	B	B	A	B	B	A	A	B	B	B	A	B	B	A	A	A	A
RAC875_c6664_63		IWB60037	1A	82.103	1A	141.6							A	B	B	B	A	B	A	B	A	B	B	B	A	A	A	A	A	B	B	B	B	B	A	B	B	A	A	B	B	B	A	B	B	A	A	A	A
Tdurum_contig92564_326		IWB73807	1A	82.103	1A	141.6							A	B	B	B	A	B	A	B	A	B	B	B	A	A	A	A	A	B	B	B	B	B	A	B	B	A	A	B	B	B	A	B	B	A	A	A	A
wsnp_Ex_c22963_32183009		IWA2768	1A	82.103	1A	141.6							A	B	B	B	A	B	A	B	A	B	B	B	A	A	A	A	A	B	B	B	B	B	A	B	B	A	A	B	B	B	A	B	B	A	A	A	A
Ex_c42595_2332		IWB20697	1A	82.103	1A	141.65							A	B	B	B	A	B	A	B	A	B	B	B	A	A	A	A	A	B	B	B	B	B	A	B	B	A	A	B	B	B	A	B	B	A	A	A	A
wsnp_Ex_rep_c66846_65240088	TG23171A	IWA5310	1A	82.103	1A	152.74	1A	70.6					A	B	B	B	A	B	A	B	A	B	B	B	A	A	A	A	A	B	B	B	B	B	A	B	B	A	A	B	B	B	A	B	B	A	A	A	A
Ex_c28144_1843		IWB20387	1A	82.37	1A	163.04							A	B	B	B	A	B	A	B	A	B	B	B	A	A	A	A	A	B	B	B	B	B	A	B	B	A	A	B	B	B	A	B	B	A	A	A	A
wsnp_Ra_c32175_41221223		IWA7862	1A	82.637	1A	159.41							A	B	B	B	A	B	A	B	A	B	B	B	A	A	A	A	A	B	B	B	B	B	A	B	B	A	A	B	B	B	A	B	B	A	A	A	A
IACX18883	TG27671A	IWB35810	1A	82.905	1A	140.43	1A	70					A	B	B	B	A	B	A	B	A	B	B	B	A	A	A	A	A	B	B	B	B	B	A	B	B	A	A	B	B	B	A	B	B	A	A	A	A
Excalibur_c59894_97	TG12141A	IWB27914	1A	83.172	1A	140.43	1A	70					A	B	B	B	A	B	A	B	A	B	B	B	A	A	A	A	A	B	B	B	B	B	A	B	B	A	A	B	B	B	A	B	B	A	A	A	A
IACX3496	TG00701A	IWB35927	1A	83.439	1A	163.1	1A	70.6	1A	123.846			A	B	B	B	A	B	A	B	A	B	B	B	A	A	A	A	A	B	B	B	B	B	A	B	B	A	A	B	B	B	A	B	B	A	A	A	A
BobWhite_c37935_124		IWB2937	1A	83.707	1A	140.43							A	B	B	B	A	B	A	B	A	B	B	B	A	A	A	A	A	B	B	B	B	B	A	B	B	A	A	B	B	B	A	B	B	A	A	A	A
wsnp_Ex_c4310_7770452		IWA3857	1A	83.707	1A	159.34							A	B	B	B	A	B	A	B	A	B	B	B	A	A	A	A	A	B	B	B	B	B	A	B	B	A	A	B	B	B	A	B	B	A	A	A	A
BS00067421_51	TG00231A	IWB10043	1A	84.424	1A	171.79	1A	70.6	1A	122.547			A	B	B	B	B	B	A	B	A	B	B	B	A	A	A	A	B	B	B	B	B	B	A	B	B	A	A	B	B	B	A	B	B	A	A	A	A
BS00033469_51		IWB7929	1A	84.537	1A	163.1			1A	123.846			A	B	B	B	B	B	A	B	A	B	B	B	A	A	A	A	B	B	B	B	B	B	A	B	B	A	A	B	B	B	A	B	B	A	A	A	A
wsnp_JD_c13903_13781269	TG33051A	IWA5839	1A	84.641	1A	171.79	1A	70.6					A	B	B	B	B	B	A	B	A	B	B	B	A	A	A	A	B	B	B	B	B	B	A	B	B	A	A	B	B	B	A	B	B	A	A	A	A
BS00065676_51		IWB9607	1A	84.641	1A	171.79							A	B	B	B	B	B	A	B	A	B	B	B	A	A	A	A	B	B	B	B	B	B	A	B	B	A	A	B	B	B	A	B	B	A	A	A	A
Ra_c58315_265	TG28981A	IWB52305	1A	84.641	1A	163.1	1A	69.5	1A	123.846			A	B	B	B	B	B	A	B	A	B	B	B	A	A	A	A	U	B	B	B	B	B	A	B	B	A	A	B	U	B	A	B	U	A	A	A	A
wsnp_Ku_c557_1166684	TG2375	IWA7173	1A	84.641	1A	162.11	1A	70					A	B	B	B	B	B	A	B	A	B	B	B	A	A	A	A	B	B	B	B	B	B	A	B	B	A	A	B	B	B	A	B	B	A	A	A	A
wsnp_Ra_c7818_13376644	TG48681A	IWA8070	1A	84.641	1A	162.32	1A	70.6					A	B	B	B	B	B	A	B	A	B	B	B	A	A	A	A	B	B	B	B	B	B	A	B	B	A	A	B	B	B	A	B	B	A	A	A	A
wsnp_Ku_c2815_5317230		IWA6835	1A	84.641	1A	162.32							A	B	B	B	B	B	A	B	A	B	B	B	A	A	A	A	B	B	B	B	B	B	A	B	B	A	A	B	B	B	A	B	B	A	A	A	A
wsnp_Ex_rep_c70358_69302556		IWA5692	1A	84.641	1A	171.04							A	B	B	B	B	B	A	B	A	B	B	B	A	A	A	A	B	B	B	B	B	B	A	B	B	A	A	B	B	B	A	B	B	A	A	A	A
RAC875_c2734_135	TG4192	IWB56058	1A	84.641	1A	171.04	1A	70	1A	122.547			A	B	B	B	B	B	A	B	A	B	B	B	A	A	A	A	B	B	B	B	B	B	A	B	B	A	A	B	B	B	A	B	B	A	A	A	A
BS00063068_51		IWB8994	1A	84.641	1A	168.94			1A	123.846			A	B	B	B	B	B	A	B	A	B	B	B	A	A	A	A	B	B	B	B	B	B	A	B	B	A	A	B	B	B	A	B	B	A	A	A	A
GENE-0112_64	TG05081D	IWB31675	1A	84.641	1A	162.11	1A	70.6					A	B	B	B	B	B	A	B	A	B	B	B	A	A	A	A	B	B	B	B	B	B	A	B	B	A	A	B	B	B	A	B	B	A	A	A	A
Kukri_c27785_400	TG17861A	IWB43491	1A	84.641	1A	171.04	1A	70					A	B	B	B	B	B	A	B	A	B	B	B	A	A	A	A	B	B	B	B	B	B	A	B	B	A	A	B	B	B	A	B	B	A	A	A	A
Kukri_c3582_87	TG28401A	IWB44485	1A	84.641	1A	163.8	1A	70.6					A	B	B	B	B	B	A	B	A	B	B	B	A	A	A	A	B	B	B	B	B	B	A	B	B	A	A	B	B	B	A	B	B	A	A	A	A
Ra_c6038_588		IWB52324	1A	84.641	1A	163.57			1A	123.846			A	B	B	B	B	B	A	B	A	B	B	B	A	A	A	A	B	B	B	B	B	B	A	B	B	A	A	B	B	B	A	B	B	A	A	A	A
Ex_c8514_1342	TG15531A	IWB21382	1A	84.641	1A	163.1	1A	70.6	1A	123.846			A	B	B	B	B	B	A	B	A	B	B	B	A	A	A	A	B	B	B	B	B	B	A	B	B	A	A	B	B	B	A	B	B	A	A	A	A
IACX662		IWB36168	1A	84.641	1A	171.79			1A	123.846			A	B	U	B	B	B	A	B	A	B	B	B	A	A	A	A	B	B	B	B	U	B	A	B	B	A	A	B	B	B	A	B	B	A	A	A	A
Kukri_c10453_875		IWB40349	1A	84.641	1A	163.1			1A	123.846			A	B	B	B	B	B	A	B	A	B	B	B	A	A	A	A	B	B	B	B	B	B	A	B	B	A	A	B	B	B	A	B	B	A	A	A	A
wsnp_Ex_c16592_25117132		IWA2152	1A	84.641	1A	168.94							A	B	B	U	B	B	A	B	A	B	B	B	A	A	A	A	B	B	U	B	B	U	A	B	B	A	A	B	U	B	A	B	B	A	A	A	A
wsnp_Ex_c25734_34995416	TG22531A	IWA2995	1A	84.641	1A	163.1	1A	70	1A	123.846			A	B	B	B	B	B	A	B	A	B	B	B	A	A	A	A	U	U	B	B	B	B	A	U	B	A	A	B	B	B	A	B	B	A	A	A	A
wsnp_Ex_c56097_58352130		IWA4292	1A	84.641	1A	162.64			1A	123.846			A	B	B	B	B	B	A	B	A	B	B	B	A	A	A	A	B	B	B	B	B	B	A	B	B	A	A	B	B	B	A	B	B	A	A	A	A
Kukri_c10239_2186	TG34671A	IWB40291	1A	84.641	1A	176.27	1A	70.6					A	B	B	B	B	B	A	B	A	B	B	B	A	A	A	A	B	B	B	B	B	B	A	B	B	A	A	B	B	B	A	B	B	A	A	A	A
RAC875_c41275_131	TG07731D	IWB57702	1A	84.742	1A	163.1	1A	69.5	1A	123.846			A	B	B	B	B	B	A	B	A	B	B	B	A	A	A	A	B	B	B	B	B	B	A	B	B	A	A	B	B	B	A	B	B	A	A	A	A
IACX11070		IWB35655	1A	84.849	1A	171.79			1A	123.846			A	B	B	B	B	B	A	B	A	B	B	B	A	A	A	A	B	B	B	B	B	B	A	B	B	A	A	B	B	B	A	B	B	A	A	A	A
BS00023101_51		IWB7423	1A	84.959	1A	171.79			1A	122.547			A	B	B	B	B	B	A	B	A	B	B	B	A	A	A	A	B	B	B	B	B	B	A	B	B	A	A	B	B	B	A	B	B	A	A	A	A
wsnp_Ex_c534_1058778		IWA4179	1A	85.094	1A	181.85							A	B	B	B	B	B	A	B	A	B	B	B	A	A	A	A	B	B	B	B	B	B	A	B	B	A	A	B	B	B	A	B	B	A	A	A	A
BS00012283_51		IWB6545	1A	85.226	1A	171.79			1A	122.547			A	B	B	B	B	B	A	B	A	B	B	B	A	A	A	A	B	B	B	B	B	B	A	B	B	A	A	B	B	B	A	B	B	A	A	A	A
wsnp_Ex_rep_c73818_71733737		IWA5740	1A	85.226	1A	163.66			1A	123.846			A	B	B	B	B	B	A	B	A	B	B	B	A	A	A	A	B	B	B	B	B	B	A	B	B	A	A	B	B	B	A	B	B	A	A	A	A
BobWhite_rep_c49207_243	TG13931A	IWB4741	1A	85.226	1A	168.94	1A	70	1A	123.846			A	B	B	B	B	B	A	B	A	B	B	B	A	A	A	A	B	B	B	B	B	B	A	B	B	A	A	B	B	B	A	B	B	A	A	A	A
Excalibur_c10167_1028	TG2605	IWB21564	1A	85.226	1A	171.79	1A	70.6					A	B	B	B	B	B	A	B	A	B	B	B	A	A	A	A	B	B	B	B	B	B	A	B	B	A	A	B	B	B	A	B	B	A	A	A	A
RAC875_c25507_551	TG2931	IWB55805	1A	85.226	1A	163.8	1A	70.6					A	B	B	B	B	B	A	B	A	B	B	B	A	A	A	A	B	B	B	B	B	B	A	B	B	A	A	B	B	B	A	B	B	A	A	A	A
RAC875_c42285_1007		IWB57831	1A	85.226	1A	183.55							A	B	B	B	B	B	A	B	A	B	B	B	A	A	A	A	B	B	B	B	B	B	A	B	B	A	A	B	B	B	A	B	B	A	A	A	A
RAC875_c53185_802	TG19621A	IWB58903	1A	85.226	1A	171.04	1A	70					A	B	B	B	B	B	A	B	A	B	B	B	A	A	A	A	B	B	B	B	B	B	A	B	B	A	A	B	B	B	A	B	B	A	A	A	A
Ku_c32078_885		IWB39171	1A	85.493	6A	325.49			1A	123.197			A	B	B	B	B	B	A	B	A	B	B	B	A	A	A	A	B	B	B	B	B	B	A	B	B	A	A	B	B	B	A	B	B	A	A	A	A
wsnp_Ku_c10065_16730445		IWA6372	1A	85.493	1A	182.33			1A	121.098			A	B	U	B	B	B	A	U	A	B	B	B	A	A	A	A	B	B	B	B	B	B	A	B	B	A	A	B	B	B	A	U	B	A	A	A	A
RAC875_c31276_1128	TG29411A	IWB56592	1A	85.493	1A	186.85	1A	70					A	B	B	B	B	B	A	B	A	B	B	B	A	A	A	A	B	B	B	B	B	B	A	B	B	A	A	B	B	B	A	B	B	A	A	A	A
wsnp_Ra_c12148_19539667	TG33491D	IWA7577	1A	85.493	1A	183.72	1A	70.6					A	B	B	B	B	B	A	B	A	B	B	B	A	A	A	A	B	B	B	B	B	B	A	B	B	A	A	B	B	B	A	B	B	A	A	A	A
Excalibur_c7033_159	TG04741A	IWB28550	1A	85.675	1A	171.79	1A	68.9	1A	123.846			A	B	B	B	B	B	A	B	A	B	B	B	A	A	A	A	B	B	B	B	B	B	A	B	B	A	A	B	B	B	A	B	B	A	A	A	A
wsnp_Ex_c12336_19686808		IWA1608	1A	85.791	1A	183.29							A	B	B	B	B	B	A	B	A	B	B	B	A	A	A	A	B	B	B	B	B	B	A	B	B	A	A	B	B	B	A	B	B	A	A	A	A
RAC875_c94534_75	TG42621A	IWB61100	1A	85.907	1A	181.13	1A	68.9					A	B	B	B	B	B	A	B	A	B	B	B	A	A	A	A	B	B	B	B	B	B	A	B	B	A	A	B	B	B	A	B	B	A	A	A	A
wsnp_Ku_c21356_31093507		IWA6709	1A	86.022	1A	182.33							A	B	B	B	B	B	A	B	A	B	B	B	A	A	A	A	B	B	B	B	B	B	A	B	B	A	A	B	B	B	A	B	B	A	A	A	A
Ex_c5192_943		IWB20856	1A	86.132	1A	183.84							A	B	B	B	B	B	A	B	A	B	B	B	A	A	A	A	B	B	B	B	B	B	A	B	B	A	A	B	B	B	A	B	B	A	A	A	A
RFL_Contig3203_1971	TG35161A	IWB64265	1A	86.237	1A	181.13	1A	70					A	B	B	B	B	B	A	B	A	B	B	B	A	A	A	A	B	B	B	B	B	B	A	B	B	A	A	B	B	B	A	B	B	A	A	A	A
CAP7_c12435_63		IWB13783	1A	86.237	1A	181.13							A	B	B	B	B	B	A	B	A	B	B	B	A	A	A	A	B	B	B	B	B	B	A	B	B	A	A	B	B	B	A	B	B	A	A	A	A
wsnp_BE495786A_Ta_2_1		IWA268	1A	86.237	1A	171.79			1A	122.547			A	B	B	B	B	B	A	B	A	B	B	B	A	A	A	A	B	B	B	B	B	B	A	B	B	A	A	B	B	B	A	B	B	A	A	A	A
GENE-0004_635	TG27051B	IWB31604	1A	86.237	1A	181.13	1A	70.6					A	B	B	B	B	B	A	B	A	B	B	B	A	A	A	A	B	B	B	B	B	B	A	B	B	A	A	B	B	B	A	B	B	A	A	A	A
IAAV3049		IWB34656	1A	86.237	1A	183.72							A	B	B	B	B	B	A	B	A	B	B	B	A	A	A	A	B	B	B	B	B	B	A	B	B	A	A	B	B	B	A	B	B	A	A	A	A
wsnp_Ex_c5192_9203682	TG10591A	IWA4117	1A	86.237	1A	185.87	1A	69.5					A	B	B	B	B	B	U	B	A	B	B	B	A	A	A	A	B	B	B	B	B	B	A	B	B	A	A	B	B	B	A	B	B	A	A	A	A
IACX4378	TG39761A	IWB35955	1A	86.237	1A	181.85	1A	69.5	1A	122.547			A	B	B	B	B	B	A	B	A	B	B	B	A	A	A	A	B	B	B	B	B	B	A	B	B	A	A	B	B	B	A	B	B	A	A	A	A
Excalibur_c30591_637		IWB24988	1A	86.237	1A	181.59			1A	122.547			A	B	B	B	B	B	A	B	A	B	B	B	A	A	A	A	B	B	B	B	B	B	A	B	B	A	A	B	B	B	A	B	B	A	A	A	A
CAP11_c1972_285		IWB12736	1A	86.237	1A	181.85			1A	122.547			A	B	B	B	B	B	A	B	A	B	B	B	A	A	A	A	B	B	B	B	B	B	A	B	B	A	A	B	B	B	A	B	B	A	A	A	A
wsnp_Ku_c24239_34199356		IWA6756	1A	86.237	1A	183.84							A	B	B	B	B	B	A	B	A	B	B	B	A	A	A	A	B	B	B	B	B	B	A	B	B	A	A	B	B	B	A	B	B	A	A	A	A
BS00022698_51	TG14281A	IWB7216	1A	86.237	1A	181.13	1A	68.9	1A	122.547			A	B	B	B	B	B	A	B	A	B	B	B	A	A	A	A	B	B	B	B	B	B	A	B	B	A	A	B	B	B	A	B	B	A	A	A	A
wsnp_Ex_c5192_9203100		IWA4116	1A	86.237	1A	185.87							A	B	B	B	B	B	A	B	A	B	B	B	A	A	A	A	B	B	B	B	B	B	A	B	B	A	A	B	B	B	A	B	B	A	A	A	A
Tdurum_contig28296_243		IWB69488	1A	86.237	1A	181.59			1A	122.547			A	B	B	B	B	B	A	B	A	B	B	B	A	A	A	A	B	B	B	B	B	B	A	B	B	A	A	B	B	B	A	B	B	A	A	A	A
IACX11338	TG17061D	IWB35691	1A	86.237	1A	187.94	1A	69.5					A	B	B	B	B	B	A	B	A	B	B	B	A	A	A	A	B	B	B	B	B	B	A	B	B	A	A	B	B	B	A	B	B	A	A	A	A
Tdurum_contig11999_293		IWB67378	1A	86.237	1A	161.36							A	B	B	B	B	B	A	B	A	B	B	B	A	A	U	A	B	B	B	B	B	B	A	B	B	A	A	B	B	B	A	B	B	A	A	A	A
wsnp_JD_c722_1080592		IWA6162	1A	86.237	1A	192.41							A	B	B	B	B	B	A	B	A	B	B	B	A	A	A	A	B	B	B	B	B	B	A	B	B	A	A	B	B	B	A	B	B	A	A	A	A
Ku_c1571_1457	TG40001A	IWB38496	1A	86.237	1A	171.29	1A	70					A	B	B	B	B	B	A	B	A	B	B	B	A	A	A	A	B	B	B	B	B	B	A	B	B	A	A	B	B	B	A	B	B	A	A	A	A
wsnp_Ex_c27940_37101775		IWA3134	1A	86.237	1A	183.72							A	B	B	B	B	B	A	B	A	B	B	B	A	A	A	A	B	B	B	B	B	B	A	B	B	A	A	B	B	B	A	B	B	A	A	A	A
wsnp_Ex_c5216_9235964	TG10601A	IWA4126	1A	86.237	1A	171.79	1A	68.9	1A	122.547			A	B	B	B	B	B	A	B	A	B	B	B	A	A	A	A	B	B	B	B	B	B	A	B	B	A	A	B	B	B	A	B	B	A	A	A	A
BS00031066_51		IWB7816	1A	86.504	1A	192.78							A	B	B	B	B	B	A	B	A	B	B	B	A	A	A	A	B	B	B	B	B	B	A	B	B	U	A	B	B	B	A	B	B	A	A	A	A
BS00092585_51		IWB11766	1A	86.504	1A	192.88							A	B	B	B	B	B	A	B	A	B	B	B	A	A	A	A	B	B	B	B	B	B	A	B	B	A	A	B	B	B	A	B	B	A	A	A	A
GENE-0410_71	TG00611B	IWB31863	1A	86.504	1A	192.5	1A	69.5					A	B	B	B	B	B	A	B	A	B	B	B	A	A	A	A	B	B	B	B	B	B	A	B	B	A	A	B	B	B	A	B	B	A	A	A	A
wsnp_Ex_rep_c105443_89868548		IWA5138	1A	86.504	1A	193.04							A	B	B	B	B	B	A	B	A	B	B	B	A	A	A	A	B	B	B	B	B	B	A	B	B	A	A	B	B	B	A	B	B	A	A	A	A
RAC875_c19579_377		IWB54862	1A	86.504	1A	193.04							A	B	B	B	B	B	A	B	A	B	B	B	A	A	A	A	B	B	B	B	B	B	A	B	B	A	A	B	B	B	A	B	B	A	A	A	A
Tdurum_contig10572_626		IWB66605	1A	87.307	1A	205.72							A	B	B	B	B	B	B	B	A	B	B	B	A	A	A	A	B	B	B	A	B	B	A	B	B	B	A	B	B	A	A	B	B	A	A	A	B
Excalibur_c15357_432		IWB22613	1A	88.084	1A	198.18							A	B	B	B	B	B	A	B	A	B	B	B	A	A	A	A	B	B	B	B	B	B	A	B	B	A	A	B	B	B	A	B	B	A	A	A	A
IAAV8804		IWB35541	1A	88.25	1A	199.1							A	B	B	B	B	B	A	B	A	B	B	B	A	A	A	A	B	B	B	B	B	B	A	B	B	A	A	B	B	B	A	B	B	A	A	A	B
IACX5793		IWB36026	1A	88.428	1A	209.62							A	B	B	B	B	B	A	B	A	B	B	B	A	A	A	A	B	B	B	B	B	B	A	B	B	A	A	B	B	B	A	B	B	A	A	A	B
IACX5960		IWB36076	1A	88.601	1A	209.62							A	B	B	B	B	B	A	B	A	B	B	B	A	A	A	A	B	B	B	B	B	B	A	B	B	A	A	B	B	B	A	B	B	A	A	A	B
BobWhite_c29908_113		IWB2320	1A	88.737	1A	199.1							A	B	B	B	B	B	A	B	A	B	B	B	A	A	A	A	B	B	B	B	B	B	A	B	B	A	A	B	B	B	A	B	B	A	A	A	B
wsnp_Ra_c3270_6136601		IWA7869	1A	88.737	1A	199.1							A	B	B	B	B	B	A	B	A	B	B	B	A	A	A	A	B	B	B	B	B	B	A	B	B	A	A	B	B	B	A	B	B	A	A	A	B
wsnp_Ra_c3270_6136110		IWA7868	1A	88.737	1A	199.1							A	B	B	B	B	B	A	B	A	B	B	B	A	A	A	A	B	B	B	B	B	B	A	B	B	A	A	B	B	B	A	B	B	A	A	A	B
Tdurum_contig16032_330		IWB68488	1A	89.004	5B	385.54							A	B	B	B	B	B	A	B	A	A	B	B	A	A	A	A	B	A	B	B	B	B	A	B	B	A	A	B	B	B	A	B	B	A	A	A	B
BS00091479_51		IWB11708	1A	100.463	1A	212.24							A	B	B	B	B	A	A	B	A	A	B	A	A	A	A	A	B	A	A	B	B	B	A	U	B	A	U	B	B	A	A	B	B	A	A	A	B
wsnp_Ku_c1642_3232242	TG46131A	IWA6595	1A	101.329	1A	213.14	1A	76.7					A	B	B	B	B	A	A	B	A	A	B	A	A	U	U	U	B	A	U	B	B	B	U	A	B	U	U	B	B	A	A	B	B	A	A	A	B
Kukri_c31891_1355		IWB44038	1A	111.336	1A	206.5							A	B	B	B	B	B	A	B	A	B	B	B	A	A	A	A	B	B	B	B	B	B	A	B	B	A	A	B	B	B	A	B	B	A	A	A	B
RAC875_c100147_55		IWB52879	1A	111.577	1A	213.4							A	B	B	B	B	B	A	B	A	B	B	B	A	A	A	A	B	B	B	B	B	B	A	B	B	A	A	B	B	B	A	B	B	A	A	A	B
BS00067652_51		IWB10113	1A	111.801	1A	200.52			1A	106.916			A	B	B	B	B	B	A	B	A	B	B	B	A	A	A	A	B	B	B	B	B	B	A	B	B	A	A	B	B	B	A	B	B	A	A	A	B
BobWhite_c46007_582		IWB3489	1A	112.007	1A	227.77					1A	125.05	A	B	B	B	B	B	A	B	A	B	B	B	A	A	A	A	B	B	B	B	B	B	A	B	B	A	A	B	B	B	A	B	B	A	A	A	B
wsnp_Ex_c20489_29564938		IWA2540	1A	112.206	1A	206.5							A	B	B	B	B	B	A	B	A	B	B	B	A	A	A	A	B	B	B	B	B	B	A	B	B	A	A	B	B	B	A	B	B	A	A	A	B
Ku_c7975_644		IWB40044	1A	112.405	1A	199.74			1A	106.916			A	B	B	B	B	B	A	B	A	B	B	B	A	A	A	A	B	B	B	B	B	B	A	B	B	A	A	B	B	B	A	B	B	A	A	A	B
Excalibur_c3475_113		IWB25493	1A	112.564	1A	224.24							A	B	B	B	B	B	A	B	A	B	B	B	A	A	A	A	B	B	B	B	B	B	A	B	B	A	A	B	B	B	A	B	B	A	A	A	B
BS00064638_51		IWB9335	1A	112.564	1A	206.92							A	B	B	B	B	B	A	B	A	B	B	B	A	A	A	A	B	B	B	B	B	B	A	B	B	A	A	B	B	B	A	B	B	A	A	A	B
wsnp_Ex_c6452_11213329		IWA4511	1A	112.564	1A	212.93							A	B	B	B	B	B	A	B	A	B	B	B	A	A	A	A	B	B	B	B	B	B	A	B	B	A	A	B	B	B	A	B	B	A	A	A	B
Kukri_c13107_100	TG0614	IWB40969	1A	112.564	1A	199.74	1A	75.6	1A	106.916			A	B	B	B	B	B	A	B	A	B	B	B	A	A	A	A	B	B	B	B	B	B	A	B	B	A	A	B	B	B	A	B	B	A	A	A	B
Ra_c1311_1360		IWB51039	1A	112.564	1A	201.54			1A	106.916			A	B	B	B	B	B	A	B	A	B	B	B	A	A	A	A	B	B	B	B	B	B	A	B	B	A	A	B	B	B	A	B	B	A	A	A	B
Excalibur_c3429_652		IWB25443	1A	112.705	1A	213.14							A	B	B	B	B	B	A	B	A	B	B	B	A	A	A	A	B	B	B	B	B	B	A	B	B	A	A	B	B	B	A	B	B	A	A	A	B
RAC875_c46551_339		IWB58262	1A	112.903	1A	213.14			6B	104.876			A	B	B	B	B	B	A	B	A	B	B	B	A	A	A	A	B	B	B	B	B	B	A	B	B	A	A	B	B	B	A	B	B	A	A	A	B
TA003063-0097	TG4320	IWB65643	1A	113.102	1A	223.23	1A	76.2					A	B	B	B	B	B	A	B	A	B	B	B	A	A	A	A	B	B	B	B	B	B	A	B	B	A	A	B	B	B	A	B	B	A	A	A	B
wsnp_Ra_c9209_15425473		IWA8101	1A	113.315	1A	201.54			1A	106.916			A	B	B	B	B	B	A	B	A	B	B	B	A	A	A	A	B	B	B	B	B	B	A	B	B	A	A	B	B	B	A	B	B	A	A	A	B
tplb0045g22_418		IWB74828	1A	113.549	1A	200.02			1A	106.916			A	B	B	B	B	B	A	B	A	B	B	B	A	A	A	A	B	B	B	B	B	B	A	B	B	A	A	B	B	B	A	B	B	A	A	A	B
BS00030036_51		IWB7753	1A	113.795	1A	206.5							A	B	B	B	B	B	A	B	A	B	B	B	A	A	A	A	B	B	B	B	B	B	A	B	B	A	A	B	B	B	A	B	B	A	A	A	B
BS00088035_51		IWB11543	1A	114.932	1A	227.77					1A	125.05	A	B	B	B	B	B	A	B	A	B	B	B	A	A	A	A	B	B	B	B	B	B	A	B	B	A	A	B	B	B	A	B	B	A	A	A	B
wsnp_Ex_c32590_41222878	TG45191A	IWA3406	1A	114.932	1A	227.77	1A	79			1A	125.05	A	B	B	B	B	B	A	B	A	B	B	B	A	A	A	A	B	B	B	B	B	B	A	B	B	A	A	B	B	B	A	B	B	A	A	A	B
Kukri_c12984_465		IWB40942	1A	117.353	1A	235.87							A	B	B	B	B	B	A	B	A	B	B	B	A	A	A	A	B	B	B	B	B	B	A	A	B	A	A	B	B	B	A	B	B	A	A	A	B
wsnp_Ex_c1997_3755945	TG01621A	IWA2484	1A	117.353	1A	235.45	1A	79.5			1A	127.765	A	B	B	B	B	B	A	B	A	B	B	B	A	A	A	A	B	B	B	B	B	B	A	A	B	A	A	B	B	B	A	B	B	A	A	A	B
Excalibur_c29605_100		IWB24862	1A	122.836									A	B	B	B	B	B	A	B	A	B	B	B	A	A	A	A	B	B	B	B	B	B	A	A	B	A	A	B	B	B	A	B	B	A	A	A	B
Excalibur_c5033_587		IWB27132	1A	123.035	1A	243.63							A	B	B	B	B	B	A	B	A	B	B	B	A	A	A	A	B	B	B	B	B	B	A	A	B	A	A	B	B	B	A	B	B	A	A	A	B
Excalibur_c29605_535		IWB24863	1A	123.208	1A	244.29							A	B	B	B	B	B	A	B	A	B	B	B	A	A	A	A	B	B	B	B	B	B	A	A	B	A	A	B	B	B	A	B	B	A	A	A	B
Kukri_c18017_1696		IWB41872	1A	123.347	1A	243.63							A	B	B	B	B	B	A	B	A	B	B	B	A	A	A	A	B	B	B	B	B	B	A	A	B	A	A	B	B	B	A	B	B	A	A	A	B
BobWhite_c12977_65		IWB439	1A	123.495	1A	245.48							A	B	B	B	B	B	A	B	A	B	B	B	A	A	A	A	B	B	B	B	B	B	A	A	B	A	A	B	B	B	A	B	B	A	A	A	B
Kukri_c56494_585		IWB46604	1A	124.972	1A	243.08							A	B	B	B	B	B	A	B	A	B	B	B	A	A	A	A	B	B	B	B	B	B	A	A	B	A	A	B	B	B	A	B	B	A	A	A	B
Excalibur_c49946_169	TG16181A	IWB27098	1A	125.183	1A	243.3	1A	81.2					A	B	B	B	B	B	A	B	A	B	B	B	A	A	A	A	B	B	B	B	B	B	A	A	B	A	A	B	B	B	A	B	B	A	A	A	B
RAC875_rep_c72162_416		IWB62844	1A	127.201									A	B	B	B	B	B	A	B	A	B	B	B	A	A	A	A	B	B	B	B	B	B	A	A	B	A	A	B	B	B	A	B	B	A	A	A	B
wsnp_Ex_rep_c68493_67319880		IWA5533	1A	127.325	1A	250.97							A	B	B	B	B	B	A	B	A	B	B	B	A	A	A	A	B	B	B	B	B	B	A	A	B	A	A	B	B	B	A	B	B	A	A	A	B
GENE-0527_92	TG05131A	IWB31945	1A	129.115	1A	253.22	1A	81.8					A	B	B	B	B	A	A	B	A	B	B	B	A	A	A	A	B	B	B	B	B	B	A	A	B	A	A	B	B	B	A	B	B	A	A	A	B
Excalibur_c7370_179		IWB28682	1A	129.237	1A	258.92							A	B	B	B	B	A	A	B	A	B	B	B	A	A	A	A	B	B	B	B	B	B	A	A	B	A	A	B	B	B	A	B	B	A	A	A	B
wsnp_Ra_c15564_23999084		IWA7639	1A	129.361	1A	258.92							A	B	B	B	B	A	A	B	A	B	B	B	A	A	A	A	B	B	B	B	B	B	A	A	B	A	A	B	B	B	A	B	B	A	A	A	B
Ku_c12688_352		IWB38341	1A	130.069	1A	253.55							A	B	B	B	B	A	A	B	A	B	B	B	A	A	A	A	B	B	B	B	B	B	A	A	B	A	A	B	B	B	A	B	B	A	A	A	B
wsnp_BG263358A_Ta_2_1		IWA530	1A	130.069	1A	253.55							A	B	B	B	B	A	A	B	A	B	B	B	A	A	A	A	B	B	B	B	B	B	A	A	B	A	A	B	B	B	A	B	B	A	A	A	B
CAP7_c4879_249		IWB14141	1A	134.955	1A	259.3							A	B	B	B	B	A	A	B	A	B	B	B	A	A	B	A	B	B	A	B	B	B	A	A	B	A	A	B	B	B	A	B	B	A	A	A	B
RAC875_rep_c102893_780		IWB61347	1A	141.434	1A	261.82							A	B	B	B	B	A	B	B	A	B	B	B	A	A	B	A	B	B	A	B	B	B	A	A	B	A	A	B	B	B	A	B	B	A	A	A	B
GENE-0262_431	TG05101A	IWB31771	1A	141.583	1A	268.52	1A	85.7					A	B	B	B	B	A	B	B	A	B	B	B	A	A	B	A	B	B	A	B	B	B	A	A	B	A	A	B	B	B	A	B	B	A	A	A	B
BS00109991_51	TG15251A	IWB12454	1A	141.784	1A	268.52	1A	85.7					A	B	B	B	B	A	B	B	A	B	B	B	A	A	B	A	B	B	A	B	B	B	A	A	B	A	A	B	B	B	A	B	B	A	A	A	B
BS00022261_51	TG24701A	IWB6995	1A	141.989	1A	268.52	1A	85.7					A	B	B	B	B	A	B	B	A	B	B	B	A	A	B	A	B	B	A	B	B	B	A	A	B	A	A	B	B	B	A	B	B	A	A	A	B
BS00022848_51		IWB7289	1A	142.164	1A	269.49							A	B	B	B	B	A	B	B	A	B	B	B	A	A	B	A	B	B	A	B	B	B	A	A	B	A	A	B	B	B	A	B	B	A	A	A	B
Ex_c4060_510		IWB20654	1A	142.359	1A	268.01							A	B	B	B	B	A	B	B	A	B	B	B	A	A	B	A	B	B	A	B	B	B	A	A	B	A	A	B	B	B	A	B	B	A	A	A	B
BS00110627_51	TG47121A	IWB12579	1A	142.536	1A	268.78	1A	85.7					A	B	B	B	B	A	B	B	A	B	B	B	A	A	B	A	B	B	A	B	B	B	A	A	B	A	A	B	B	B	A	B	B	A	A	A	B
RAC875_c6798_467	TG29771B	IWB60140	1A	142.697	1A	268.01	1A	85.7					A	B	B	B	B	A	B	B	A	B	B	B	A	A	B	A	B	B	A	B	B	B	A	A	B	A	A	B	B	B	A	B	B	A	A	A	B
Excalibur_c97157_65	TG16361A	IWB29580	1A	147.471	1A	271.33	1A	88.5					A	B	B	B	B	A	B	B	A	B	B	B	B	A	B	B	B	B	A	B	B	B	A	A	B	A	A	B	B	B	B	B	B	A	B	A	B
Excalibur_c97157_137		IWB29579	1A	147.471	1A	271.33							A	B	B	B	B	A	B	B	A	B	B	B	B	A	B	B	B	B	A	B	B	B	A	A	B	A	A	B	B	B	B	B	B	A	B	A	B
BobWhite_c16206_317		IWB884	1A	147.471	1A	270.24							A	B	B	B	B	U	B	B	A	A	B	B	B	U	B	B	B	A	A	B	B	B	U	U	B	A	U	B	B	B	B	B	B	A	B	A	B
RAC875_c21411_162	TG4179	IWB55184	1A	147.809	1A	272.72	1A	89.1					A	B	B	B	B	A	B	B	A	B	B	B	B	A	B	B	B	B	A	B	B	B	A	A	B	A	A	B	B	B	B	B	B	A	B	A	B
Tdurum_contig21114_255	TG13001A	IWB68917	1A	147.955	1A	272.34	1A	87.9					A	B	B	B	B	A	B	B	A	B	B	B	B	A	B	B	B	B	A	B	B	B	A	A	B	A	A	B	B	B	B	B	B	A	B	A	B
wsnp_Ex_c33452_41938013	TG10361A	IWA3434	1A	148.056	1A	272.98	1A	89.1					A	B	B	B	B	A	B	B	A	B	B	B	B	A	B	B	B	B	A	B	B	B	A	A	B	A	A	B	B	B	B	B	B	A	B	A	B
wsnp_RFL_Contig3542_3718200	TG11561D	IWA8482	1A	148.056	1A	276.05	1A	87.9					A	B	B	B	B	A	B	B	A	B	B	B	B	A	B	B	B	B	A	B	B	B	A	A	B	A	A	B	B	B	B	B	B	A	B	A	B
Excalibur_c22768_963		IWB23855	1A	148.056	1A	275.02							A	B	B	B	B	A	B	B	A	B	B	B	B	A	B	B	B	B	A	B	B	B	A	A	B	A	A	B	B	B	B	B	B	A	B	A	B
IACX5994	TG39791A	IWB36087	1A	148.056	1A	272.98	1A	89.1					A	B	B	B	B	A	B	B	A	B	B	B	B	A	B	B	B	B	A	B	B	B	A	A	B	A	A	B	B	B	B	B	B	A	B	A	B
wsnp_Ex_c33452_41938159	TG45231A	IWA3435	1A	148.056	1A	272.98	1A	89.1					A	B	B	B	B	A	B	B	A	B	B	B	B	A	B	B	B	B	A	B	B	B	A	A	B	A	A	B	B	B	B	B	B	A	B	A	B
BobWhite_c5967_537		IWB4042	1A	148.056	1A	275.02							A	B	B	B	B	A	B	B	A	B	B	B	B	A	B	B	B	B	A	B	B	B	A	A	B	A	A	B	B	B	B	B	B	A	B	A	B
wsnp_BE444305A_Td_2_1		IWA145	1A	148.187	1A	276.05							A	B	B	B	B	A	B	B	A	B	B	B	B	A	B	B	B	B	A	B	B	B	A	A	B	A	A	B	B	B	B	B	B	A	B	A	B
BobWhite_c23632_322	TG3609	IWB1728	1A	148.35	1A	271.83	1A	87.9					A	B	B	B	B	A	B	B	A	B	B	B	B	A	B	B	B	B	A	B	B	B	A	A	B	A	A	B	B	B	B	B	B	A	B	A	B
RAC875_c32379_216		IWB56724	1A	155.03	1A	283.06					1A	154.997	A	B	B	B	B	A	B	B	A	B	B	B	B	A	B	B	B	B	A	B	B	B	A	A	B	A	A	B	B	B	B	B	B	A	B	A	B
BS00110877_51		IWB12600	1A	155.279	1A	281.44							A	B	B	B	B	A	B	B	U	B	U	B	B	A	B	B	B	B	A	B	B	B	A	A	U	A	A	B	B	B	B	B	B	A	B	A	B
tplb0059d21_1032		IWB75206	1A	155.512	1A	281.26							A	B	B	B	B	A	B	B	B	B	B	B	B	A	B	B	B	B	A	B	B	B	A	A	B	A	A	B	B	B	B	B	B	A	B	A	B
RAC875_c67771_805		IWB60125	1A	155.716	1A	277.92			1B	108.734			A	B	B	B	B	A	B	B	B	B	B	B	B	A	B	B	B	B	A	B	B	B	A	A	B	A	A	B	B	B	B	B	B	A	B	A	B
BS00037976_51		IWB8121	1A	155.877	1A	281.79							A	B	B	B	B	A	B	B	B	B	B	B	B	A	B	B	B	B	A	B	B	B	A	A	B	A	A	B	B	B	B	B	B	A	B	A	B
BobWhite_c22134_398		IWB1562	1A	156.089	1A	280.76							A	B	B	B	B	A	B	B	A	B	B	B	B	A	B	B	B	B	A	B	B	B	A	A	B	A	A	B	B	B	B	B	B	A	B	A	B
RAC875_c41993_582		IWB57802	1A	156.341	1A	281.83							A	B	B	B	B	A	B	B	B	B	B	B	B	A	B	B	B	B	A	B	B	B	A	A	B	A	A	B	B	B	B	B	B	A	B	A	B
BS00023203_51		IWB7472	1A	156.602	1A	281.26							A	B	B	B	B	A	B	B	B	B	B	B	B	A	B	B	B	B	A	B	B	B	A	A	B	A	A	B	B	B	B	B	B	A	B	A	B
TA005289-1104		IWB65954	1A	156.877	1A	278.02							A	B	B	B	B	A	B	B	B	B	B	B	B	A	B	B	B	B	A	B	B	B	A	A	B	A	A	B	B	B	B	B	B	A	B	A	B
Tdurum_contig15967_90		IWB68479	1A	158.046	1A	282.21							A	B	B	B	B	A	B	B	B	B	B	B	B	A	B	B	B	B	A	B	B	B	A	A	B	A	A	B	B	B	B	B	B	A	B	A	B
RAC875_c60162_129		IWB59500	1A	158.262	1A	283.3							A	B	B	B	B	A	B	B	B	B	B	B	B	A	B	B	B	B	A	B	B	B	A	A	B	A	A	B	B	B	B	B	B	A	B	A	B
Tdurum_contig51833_439		IWB72212	1A	158.262	1A	282.93							A	B	B	B	B	A	B	B	B	B	B	B	B	A	B	B	B	B	A	B	B	B	A	A	B	A	A	B	B	B	B	B	B	A	B	A	B
BobWhite_c24825_349		IWB1856	1A	158.262	1A	283.3							A	B	B	B	B	A	B	B	B	B	B	B	B	A	B	B	B	B	A	B	B	B	A	A	B	A	A	B	B	B	B	B	B	A	B	A	B
Tdurum_contig63715_235		IWB72959	1A	158.262	1A	282.21							A	B	B	B	B	A	B	B	B	B	B	B	B	A	B	B	B	B	A	B	B	B	A	A	B	A	A	B	B	B	B	B	B	A	B	A	B
Tdurum_contig10365_341		IWB66484	1A	158.262	1A	282.57							A	B	B	B	B	A	B	B	B	B	B	B	B	A	B	B	B	B	A	B	B	B	A	A	B	A	A	B	B	B	B	B	B	A	B	A	B
Ra_c29200_300		IWB51733	1A	158.638	1A	283.06							A	B	B	B	B	A	B	B	B	B	B	B	B	A	B	B	B	B	A	B	B	B	A	A	B	A	A	B	B	B	B	B	B	A	B	A	B
wsnp_JD_c13024_13129681		IWA5822	1A	158.744	1A	283.96							A	B	B	B	B	A	B	B	B	B	B	B	B	A	B	B	B	B	A	B	B	B	A	A	B	A	A	B	B	B	B	B	B	A	B	A	B
Tdurum_contig75762_406		IWB73306	1A	158.849	1A	283.3							A	B	B	B	B	A	B	B	B	B	B	B	B	A	B	B	B	B	A	B	B	B	A	A	B	A	A	B	B	B	B	B	B	A	B	A	B
Tdurum_contig75762_377		IWB73305	1A	158.958	1A	283.3							A	B	B	B	B	A	B	B	B	B	B	B	B	A	B	B	B	B	A	B	B	B	A	A	B	A	A	B	B	B	B	B	B	A	B	A	B
JD_c13024_360		IWB36967	1A	159.071	1A	283.3							A	B	B	B	B	A	B	B	B	B	B	B	B	A	B	B	B	B	A	B	B	B	A	A	B	A	A	B	B	B	B	B	B	A	B	A	B
IAAV3650		IWB34750	1A	159.279	1A	283.3							A	B	B	B	B	A	B	B	B	B	B	B	B	A	B	B	B	B	A	B	B	B	A	A	B	A	A	B	B	B	B	B	B	A	B	A	B
wsnp_CAP8_rep_c3938_1936666		IWA1225	1A	159.541	1A	283.96							A	B	B	B	B	A	B	B	B	B	B	B	B	A	B	B	B	B	A	B	B	B	A	A	B	A	A	B	B	B	B	B	B	A	B	A	B
Kukri_c55266_242		IWB46495	1A	159.541	1A	284.04							A	B	B	B	B	A	B	B	B	B	B	B	B	A	B	B	B	B	A	B	B	B	A	A	B	A	A	B	B	B	B	B	B	A	B	A	B
BobWhite_rep_c65812_710		IWB5566	1A	159.541	1A	283.96							A	B	B	B	B	A	B	B	B	B	B	B	B	A	B	B	B	B	A	B	B	B	A	A	B	A	A	B	B	B	B	B	B	A	B	A	B
IAAV3156		IWB34672	1A	159.541	1A	283.96							A	B	B	B	B	A	B	B	B	B	B	B	B	A	B	B	B	B	A	B	B	B	A	A	B	A	A	B	B	B	B	B	B	A	B	A	B
wsnp_JD_c4904_6034093		IWA6081	1A	159.541	1A	288.54							A	B	B	B	B	A	B	B	B	B	B	B	B	A	B	B	B	B	A	B	B	B	A	A	B	A	A	B	B	B	B	B	B	A	B	A	B
wsnp_BE494527A_Ta_2_1		IWA254	1A	159.839	1A	283.79							A	B	B	B	B	A	B	B	B	B	B	B	B	A	B	B	B	B	A	B	B	B	A	A	B	A	A	B	B	B	B	B	B	A	B	A	B
Tdurum_contig5711_242		IWB72557	1A	159.839	1A	284.04							A	B	B	B	B	A	B	B	B	B	B	B	B	A	B	B	B	B	A	B	B	B	A	A	B	A	A	B	B	B	B	B	B	A	B	A	B
RAC875_c11363_527		IWB53317	1A	161.986	1A	284.08							A	B	B	B	B	A	B	B	B	B	A	B	B	A	B	B	B	B	A	B	B	B	A	A	B	A	U	B	B	B	B	B	B	A	B	A	B
CAP7_c490_123		IWB14143	1A	164.069	1A	356.48							A	B	B	B	B	A	B	B	B	B	A	B	B	A	B	B	B	B	A	B	B	B	A	A	B	A	A	B	B	B	B	B	B	A	B	A	B
wsnp_Ex_c23598_32826926		IWA2818	1A	164.594	1A	320.23							A	B	B	B	B	A	B	B	B	B	A	B	B	A	B	B	B	B	A	B	B	B	A	A	B	A	A	B	B	B	B	B	B	A	B	A	B
CAP12_c8163_118		IWB13551	1A	164.856	1A	358.29							A	B	B	B	B	A	B	B	B	B	A	B	B	A	B	B	B	B	A	B	B	B	A	A	B	A	A	B	B	B	B	B	B	A	B	A	B
Kukri_c2338_533		IWB42798	1A	165.119	1A	358.34							A	B	B	B	B	A	B	B	B	B	A	B	B	A	B	B	B	B	A	B	B	B	A	A	B	A	A	B	B	B	B	B	B	A	B	A	B
wsnp_Ex_c7684_13109335		IWA4713	1A	165.38	1A	358.34							A	B	B	B	B	A	B	B	B	B	A	B	B	A	B	B	B	B	A	B	B	B	A	A	B	A	A	B	B	B	B	B	B	A	B	A	B
Excalibur_c23598_1632		IWB24001	1A	165.637	1A	323.35							A	B	B	B	B	A	B	B	B	B	A	B	B	A	B	B	B	B	A	B	B	B	A	A	B	A	A	B	B	B	B	B	B	A	B	A	B
Ku_c3523_1959		IWB39248	1A	165.891	1A	286.61							A	B	B	B	B	A	B	B	B	B	A	B	B	A	B	B	B	B	A	B	B	B	A	A	B	A	A	B	B	B	B	B	B	A	B	A	B
RAC875_c11363_678		IWB53319	1A	166.141									A	B	B	B	B	A	B	B	B	B	A	B	B	A	B	B	B	B	A	B	B	B	A	A	B	A	A	B	B	B	B	B	B	A	B	A	B
BobWhite_c6664_644		IWB4214	1A	166.387	1A	370.75					1A	200.724	A	B	B	B	B	A	B	B	B	B	A	B	B	A	B	B	B	B	A	B	A	B	A	A	B	A	A	B	B	B	B	B	B	A	B	A	B
Tdurum_contig8224_378		IWB73557	1A	166.632	1A	358.34							A	B	B	B	B	A	B	B	B	B	A	B	B	A	B	B	B	B	A	B	B	B	A	A	B	A	A	B	B	B	B	B	B	A	B	A	B
IAAV5567		IWB35045	1A	166.878	1A	356.99							A	B	B	B	B	A	B	B	B	B	A	B	B	A	B	B	B	B	A	B	B	B	A	A	B	A	A	B	B	B	B	B	B	A	B	A	B
Excalibur_c41553_213		IWB26250	1A	167.124	1A	356.99							A	B	B	B	B	A	B	B	B	B	A	B	B	A	B	B	B	B	A	B	B	B	A	A	B	A	A	B	B	B	B	B	B	A	B	A	B
Excalibur_c16947_114		IWB22882	1A	167.369	1A	344.88							A	B	B	B	B	A	B	B	B	B	A	B	B	A	B	B	B	B	A	B	B	B	A	A	B	A	A	B	B	B	B	B	B	A	B	A	B
BobWhite_c44164_402		IWB3351	1A	167.615	1A	358.21							A	B	B	B	B	A	B	B	B	B	A	B	B	A	B	B	B	B	A	B	B	B	A	A	B	A	A	B	B	B	B	B	B	A	B	A	B
BobWhite_c37358_208		IWB2902	1A	167.861	1A	324.78							A	B	B	B	B	A	B	B	B	B	A	B	B	A	B	B	B	B	A	B	B	B	A	A	B	A	A	B	B	B	B	B	B	A	B	A	B
wsnp_Ex_c10903_17717179		IWA1404	1A	168.106	1A	344.88							A	B	B	B	B	A	B	B	B	B	A	B	B	A	B	B	B	B	A	B	B	B	A	A	B	A	A	B	B	B	B	B	B	A	B	A	B
wsnp_Ku_rep_c109724_94227136		IWA7428	1A	168.352	1A	293.22			1A	45.0003			A	B	B	B	B	A	B	B	B	B	A	B	B	A	B	B	B	B	A	B	B	B	A	A	B	A	A	B	B	B	B	B	B	A	B	A	B
wsnp_Ex_c28149_37293117		IWA3145	1A	168.598	1A	344.88							A	B	B	B	B	A	B	B	B	B	A	B	B	A	B	B	B	B	A	B	B	B	A	A	B	A	A	B	B	B	B	B	B	A	B	A	B
BobWhite_c44164_151		IWB3350	1A	168.819	1A	320.27							A	B	B	B	B	A	B	B	B	B	A	B	B	A	B	B	B	B	A	B	B	B	A	A	B	A	A	B	B	B	B	B	B	A	B	A	B
IACX2413		IWB35856	1A	168.937	1A	288.41							A	B	B	B	B	A	B	B	B	B	A	B	B	A	B	B	B	B	A	B	B	B	A	A	B	A	A	B	B	B	B	B	B	A	B	A	B
Kukri_c51781_199		IWB46190	1A	168.937	1A	342.52							A	B	B	B	B	A	B	B	B	B	A	B	B	A	B	B	B	B	A	B	B	B	A	A	B	A	A	B	B	B	B	B	B	A	B	A	B
wsnp_Ex_c41553_48351921		IWA3783	1A	168.937	1A	356.99							A	B	B	B	B	A	B	B	B	B	A	B	B	A	B	B	B	B	A	B	B	B	A	A	B	A	A	B	B	B	B	B	B	A	B	A	B
BS00067119_51		IWB9961	1A	168.937	1A	284.17							A	B	B	B	B	A	B	B	B	B	A	B	B	A	B	B	B	B	A	B	B	B	A	A	B	A	A	B	B	B	B	B	B	A	B	A	B
CAP12_c6629_301		IWB13506	1A	168.937	1A	321.85							A	B	B	B	B	A	B	B	B	B	A	B	B	A	B	B	B	B	A	B	B	B	A	A	B	A	A	B	B	B	B	B	B	A	B	A	B
Tdurum_contig62584_770		IWB72899	1A	168.937	1A	321.85							A	B	B	B	B	A	B	B	B	B	A	B	B	A	B	B	B	B	A	B	B	B	A	A	B	A	A	B	B	B	B	B	B	A	B	A	B
wsnp_Ku_c816_1684613		IWA7316	1A	168.937	1A	355.59							A	B	B	B	B	A	B	B	B	B	A	B	B	A	B	B	B	B	A	B	B	B	A	A	B	A	A	B	B	B	B	B	B	A	B	A	B
TA001430-0733		IWB65396	1A	168.937	1A	344.88							A	B	B	B	B	A	B	B	B	B	A	B	B	A	B	B	B	B	A	B	B	B	A	A	B	A	A	B	B	B	B	B	B	A	B	A	B
Kukri_c44895_88		IWB45492	1A	169.287	1A	288.41							A	B	B	B	B	A	B	B	B	B	A	B	B	A	B	B	B	B	A	B	B	B	A	A	B	A	A	B	B	B	B	B	B	A	B	A	B
Kukri_c44895_139		IWB45491	1A	169.441	1A	324.78							A	B	B	B	B	A	B	B	B	B	A	B	B	A	B	B	B	B	A	B	B	B	A	A	B	A	A	B	B	B	U	B	B	A	B	A	B
BS00065268_51		IWB9497	1A	169.558	1A	286.75							A	B	B	B	B	A	B	B	B	B	A	B	B	A	B	B	B	B	A	B	B	B	A	A	B	A	A	B	B	B	B	B	B	A	B	A	B
BobWhite_rep_c49755_131		IWB4804	1A	169.558	1A	288.41			1A	71.7022			A	B	B	B	B	A	B	B	B	B	A	B	B	A	B	B	B	B	A	B	B	B	A	A	B	A	A	B	B	B	B	B	B	A	B	A	B
BS00066212_51		IWB9746	1A	169.558	1A	324.78			1A	70.9979			A	B	B	B	B	A	B	B	B	B	A	B	B	A	B	B	B	B	A	B	B	B	A	A	B	A	A	B	B	B	B	B	B	A	B	A	B
Tdurum_contig78830_348		IWB73444	1A	169.558	1A	320.23							A	B	B	B	B	A	B	B	B	B	A	B	B	A	B	B	B	B	U	B	B	B	U	A	B	U	A	B	B	B	B	B	B	A	B	U	B
BS00072408_51		IWB10613	1A	169.558	1A	320.23					1A	183.672	A	B	B	B	B	A	B	B	B	B	A	B	B	A	B	B	B	B	A	B	B	B	A	A	B	A	A	B	B	B	B	B	B	A	B	A	B
wsnp_Ex_c34594_42877119		IWA3485	1A	169.558	1A	322.85					1A	183.672	A	B	B	B	B	A	B	B	B	B	A	B	B	A	B	B	B	B	A	B	B	B	A	A	B	A	A	B	B	B	B	B	B	A	B	A	B
Tdurum_contig83247_74		IWB73626	1A	169.558	1A	359.54					1A	182.4	A	B	B	B	B	A	B	B	B	B	A	B	B	A	B	B	B	B	A	B	B	B	U	A	B	A	A	B	B	B	B	B	B	A	B	A	B
Tdurum_contig51167_534		IWB72161	1A	169.558	1A	342.52							A	B	B	B	B	A	B	B	B	B	A	B	B	A	B	B	B	B	A	B	B	B	A	A	B	A	A	B	B	B	B	B	B	A	B	A	B
Tdurum_contig51167_390		IWB72160	1A	169.558	1A	342.7							A	B	B	B	B	A	B	B	B	B	A	B	B	A	B	B	B	B	A	B	B	B	A	A	B	A	A	B	B	B	B	B	B	A	B	A	B
Tdurum_contig47345_284		IWB71793	1A	169.558	1A	344.88			1A	73.027	1A	163.481	A	B	B	B	B	A	B	B	B	B	A	B	B	A	B	B	B	B	A	B	B	B	A	A	B	A	A	B	B	B	B	B	B	A	B	A	B
RAC875_c49433_308		IWB58556	1A	169.558	1A	327.89					1A	164.414	A	B	B	B	B	A	B	B	B	B	A	B	B	A	B	B	B	B	A	B	B	B	A	A	B	A	A	B	B	B	B	B	B	A	B	A	B
RAC875_c48804_590		IWB58474	1A	169.558	1A	358.29							A	B	B	B	B	A	B	B	B	B	A	B	B	A	B	B	B	B	A	B	B	B	A	A	B	A	A	B	B	B	B	B	B	A	B	A	B
Kukri_c67703_174		IWB47411	1A	169.558	1A	320.27					1A	181.466	A	B	B	B	B	A	B	B	B	B	A	B	B	A	B	B	B	B	A	B	B	B	A	A	B	A	A	B	B	B	B	B	B	A	B	A	B
CAP7_c4277_191		IWB14091	1A	169.558	1A	320.23					1A	182.739	A	B	B	B	B	A	B	B	B	B	A	B	B	A	B	B	B	B	A	B	B	B	A	A	B	A	A	B	B	B	B	B	B	A	B	A	B
CAP12_rep_c6128_120		IWB13639	1A	169.558	1A	324.78							A	B	B	B	B	A	B	B	B	B	A	B	B	A	B	B	B	B	A	B	B	B	A	A	B	A	A	B	B	B	B	B	B	A	B	A	B
wsnp_Ex_c34594_42877243		IWA3486	1A	169.558	1A	320.23					1A	183.672	A	B	B	B	B	A	B	B	B	B	A	B	B	A	B	B	B	B	A	B	B	B	A	A	B	A	A	B	B	B	B	B	B	A	B	A	B
Tdurum_contig78830_745		IWB73445	1A	169.558	1A	320.27					1A	182.739	A	B	B	B	B	A	B	B	B	B	A	B	B	A	B	B	B	B	A	B	B	B	A	A	B	A	A	B	B	B	B	B	B	A	B	A	B
Jagger_c6772_80		IWB36704	1A	169.558	1A	293.05							A	B	B	B	B	A	B	B	B	B	A	B	B	A	B	B	B	B	A	B	B	B	A	A	B	A	A	B	B	B	B	B	B	A	B	A	B
Kukri_c16271_397		IWB41550	1A	169.558	1A	356.66							A	B	B	B	B	A	B	B	B	B	A	B	U	A	B	B	U	B	A	B	B	B	A	A	B	A	A	B	B	B	B	B	B	A	B	A	B
wsnp_CAP7_rep_c5385_2417464		IWA1118	1A	169.558	1A	320.23							A	B	B	B	B	A	B	B	B	B	A	B	B	A	B	B	B	B	A	B	B	B	A	A	B	A	A	B	B	B	B	B	B	A	B	A	B
wsnp_Ra_c4184_7637695		IWA7924	1A	169.558	1A	320.23					1A	181.806	A	B	B	B	B	A	B	B	B	B	A	B	B	A	B	B	B	B	A	B	B	B	A	A	B	A	A	B	B	B	B	B	B	A	B	A	B
wsnp_Ex_c23143_32376622		IWA2783	1A	169.558	1A	295.29					1A	164.075	A	B	B	B	B	A	B	B	B	B	A	B	B	A	B	B	B	B	A	B	B	B	A	A	B	A	A	B	B	B	B	B	B	A	B	A	B
wsnp_Ex_c19353_28290651		IWA2405	1A	169.558	1A	321.85							A	B	B	B	B	A	B	B	B	B	A	B	B	A	B	B	B	B	A	B	B	B	A	A	B	A	A	B	B	B	B	B	B	A	B	A	B
tplb0021i12_383		IWB74107	1A	169.558	1A	345.87							A	B	B	B	B	A	B	B	B	B	A	B	B	A	B	B	B	B	A	B	B	B	A	A	B	A	A	B	B	B	B	B	B	A	B	A	B
Ra_c5683_1762		IWB52276	1A	169.558	1A	321.85							A	B	B	B	B	A	B	B	B	B	A	B	B	A	B	B	B	B	A	B	B	B	A	A	B	A	A	U	B	B	B	B	B	A	U	A	B
Kukri_c16271_544		IWB41551	1A	169.558	1A	295.16							A	B	B	B	B	A	B	B	B	B	A	B	B	A	B	B	B	B	A	B	B	B	A	A	B	A	A	B	B	B	B	B	B	A	B	A	B
Excalibur_c30974_65		IWB25046	1A	169.558	1A	323.35					1A	181.466	A	B	B	B	B	A	B	B	B	B	A	B	B	A	B	B	B	B	A	B	B	B	A	A	B	A	A	B	B	B	B	B	B	A	B	A	B
BS00079087_51		IWB11057	1A	169.558	1A	345.87							A	B	B	B	B	A	B	B	B	B	A	B	B	A	B	B	B	B	A	B	B	B	A	A	B	A	A	B	B	B	B	B	B	A	B	A	B
BobWhite_c46857_82		IWB3536	1A	169.558	1A	321.85					1A	181.466	A	B	B	B	B	A	B	B	B	B	A	B	B	A	B	B	B	B	A	B	B	B	A	A	B	A	A	B	B	B	B	B	B	A	B	A	B
Tdurum_contig80278_250		IWB73464	1A	169.558	1A	321.85					1A	183.672	A	B	B	B	B	A	B	B	B	B	A	B	B	A	B	B	B	B	A	B	B	B	A	A	B	A	A	B	B	B	B	B	B	A	B	A	B
Kukri_c30924_203		IWB43918	1A	169.558	1A	321.85							A	B	B	B	B	A	B	B	B	B	A	B	B	A	B	B	B	B	A	B	B	B	A	A	B	A	A	B	B	B	B	B	B	A	B	A	B
BobWhite_c15256_225		IWB766	1A	169.558	1A	344.88							A	B	B	B	B	A	B	B	B	B	A	B	B	A	B	B	B	B	A	B	B	B	A	A	B	A	A	B	B	B	B	B	B	A	B	A	B
BobWhite_c19182_280		IWB1256	1A	169.558	1A	344.88							A	B	B	B	B	A	B	B	B	B	A	B	B	A	B	B	B	B	A	B	B	B	A	A	B	A	A	B	B	B	B	B	B	A	B	A	B
Kukri_c35030_266		IWB44402	1A	169.558	1A	288.09							A	B	B	B	B	A	B	B	B	B	A	B	B	A	B	B	B	B	A	B	B	B	A	A	B	A	A	B	B	B	B	B	B	A	B	A	B
wsnp_JD_c825_1223506		IWA6191	1A	169.558	1A	358.34							A	B	B	B	B	A	B	B	B	B	A	B	B	A	B	B	B	B	A	B	B	B	A	A	B	A	A	B	B	B	B	B	B	A	B	A	B
Kukri_c19251_236		IWB42097	1A	169.558	1A	324.78					1A	181.466	A	B	B	B	B	A	B	B	B	B	A	B	B	A	B	B	B	B	A	B	B	B	A	A	B	A	A	B	B	B	B	B	B	A	B	A	B
Kukri_c47131_569		IWB45733	1A	169.558	1A	288.53					1A	167.299	A	B	B	B	B	A	B	B	B	B	A	B	B	A	B	B	B	B	A	B	B	B	A	A	B	A	A	B	B	B	B	B	B	A	B	A	B
RAC875_c17651_1174		IWB54518	1A	169.558	1A	344.88							A	B	B	B	B	A	B	B	B	B	A	B	B	A	B	B	B	B	A	B	B	B	A	A	B	A	A	B	B	B	B	B	B	A	B	A	B
RAC875_rep_c71093_1070		IWB62751	1A	169.558	1A	345.87							A	B	B	B	B	A	B	B	B	B	A	B	B	A	B	B	B	B	A	B	B	B	A	A	B	A	A	B	B	B	B	B	B	A	B	A	B
Tdurum_contig51167_810		IWB72162	1A	169.558	1A	344.88							A	B	B	B	B	A	B	B	B	B	A	B	B	A	B	B	B	B	A	B	B	B	A	A	B	A	A	B	B	B	B	B	B	A	B	A	B
tplb0031l06_747		IWB74445	1A	169.558	1A	288.53					1A	167.299	A	B	B	B	B	A	B	B	B	B	A	B	B	A	B	B	B	B	A	B	B	B	A	A	B	A	A	B	B	B	B	B	B	A	B	A	B
wsnp_CAP12_rep_c8598_3608465		IWA1015	1A	169.558	1A	321.85					1A	182.4	A	B	B	B	B	A	B	B	B	B	A	B	B	A	B	B	B	B	A	B	B	B	A	A	B	A	A	B	B	B	B	B	B	A	B	A	B
wsnp_Ex_c13955_21833712		IWA1837	1A	169.558	1A	295.29					1A	163.82	A	B	B	B	B	A	B	B	B	B	A	B	B	A	B	B	B	B	A	B	B	B	A	A	B	A	A	B	B	B	B	B	B	A	B	A	B
wsnp_Ex_c19353_28290393		IWA2404	1A	169.558	1A	321.85					1A	167.299	A	B	B	B	B	A	B	B	B	B	A	B	B	A	B	B	B	B	A	B	B	B	A	A	B	A	A	B	B	B	B	B	B	A	B	A	B
wsnp_JD_rep_c49006_33254974		IWA6253	1A	169.558	1A	345.87							A	B	B	B	B	A	B	B	B	B	A	B	B	A	B	B	B	B	A	B	B	B	A	A	B	A	A	B	B	B	B	B	B	A	B	A	B
wsnp_Ex_c6488_11266589		IWA4523	1A	169.558	1A	297.6					1A	166.705	A	B	B	B	B	A	B	B	B	B	A	B	B	A	B	B	B	B	A	B	B	B	A	A	B	A	A	B	B	B	B	B	B	A	B	A	B
Excalibur_rep_c110054_341		IWB30452	1A	169.558	1A	321.85					1A	166.705	A	B	B	B	B	A	B	B	B	B	A	B	B	A	B	B	B	B	A	B	B	B	A	A	B	A	A	B	B	B	B	B	B	A	B	A	B
RAC875_rep_c108284_98		IWB61773	1A	169.558	1A	321.85					1A	181.806	A	B	B	B	B	A	B	B	B	B	A	B	B	A	B	B	B	B	A	B	B	B	A	A	B	A	A	B	B	B	B	B	B	A	B	A	B
wsnp_Ex_c3264_6017750		IWA3409	1A	169.558	1A	358.21			1A	36.3481			A	B	B	B	B	A	B	B	B	B	A	B	B	A	B	B	B	B	A	B	B	B	A	A	B	A	A	B	B	B	B	B	B	A	B	A	B
RAC875_rep_c69152_184		IWB62537	1A	169.668	1A	320.27					1A	181.466	A	B	B	B	B	A	B	B	B	B	A	B	B	A	B	B	B	B	A	B	B	B	A	A	B	A	A	B	B	B	B	B	B	A	B	A	B
BobWhite_c6820_199		IWB4244	1A	169.792	1A	358.21			1A	36.3481			A	B	B	B	B	A	B	B	B	B	A	B	B	A	B	B	B	B	A	B	B	B	A	A	B	A	A	B	B	B	B	B	B	A	B	A	B
Tdurum_contig60210_371		IWB72719	1A	170.088	1A	288.8							A	B	B	B	B	A	B	B	B	B	A	B	B	A	B	B	B	B	A	B	B	B	A	A	B	A	A	B	B	B	B	B	B	A	B	A	B
BobWhite_c20553_568		IWB1403	1A	170.088	1A	288.41					1A	166.705	A	B	B	B	B	A	B	B	B	B	A	B	B	A	B	B	B	B	A	B	B	B	A	A	B	A	A	B	B	B	B	B	B	A	B	A	B
Excalibur_c23598_1502		IWB24000	1A	170.6	1A	344.88							A	B	B	B	B	A	B	B	B	B	A	B	B	A	B	B	B	B	A	B	B	B	A	A	B	A	A	B	B	B	B	B	B	A	B	A	B
wsnp_Ra_rep_c108284_91604017		IWA8135	1A	171.056	1A	344.88					1A	183.333	A	B	B	B	B	A	B	B	B	B	A	B	B	A	B	B	B	B	A	B	B	B	A	A	B	A	A	B	B	B	B	B	B	A	B	A	B
Tdurum_contig51167_915		IWB72163	1A	171.17	1A	342.52							A	B	B	B	B	A	B	B	B	B	A	B	B	A	B	B	B	B	A	B	B	B	A	A	B	A	A	B	B	B	B	B	B	A	B	A	B
Jagger_c468_53		IWB36607	1A	171.279	1A	288.41			1A	71.7022			A	B	B	B	B	A	B	B	B	B	A	B	B	A	B	B	B	B	A	B	B	B	A	A	B	A	A	B	B	B	B	B	B	A	B	A	B
wsnp_Ex_c12399_19776420		IWA1618	1A	171.4	1A	320.27					1A	183.672	A	B	B	B	B	A	B	B	B	B	A	B	B	A	B	B	B	B	A	B	B	B	A	A	B	A	A	B	B	B	B	B	B	A	B	A	B
wsnp_CAP11_rep_c7847_3468669		IWA886	1A	171.862	1A	344.96							A	B	B	B	B	A	B	B	B	B	A	B	B	A	B	B	B	B	A	B	B	B	A	A	B	A	A	B	B	B	B	B	B	A	B	A	B
RAC875_c3057_2297		IWB56494	1A	172.195									A	B	B	B	B	A	B	B	B	B	A	B	B	A	B	B	B	B	A	B	B	B	A	A	B	A	A	B	B	B	B	B	B	A	B	A	B
Excalibur_c21534_1436		IWB23648	1A	172.195	1A	324.78			1B	108.068	1A	164.414	A	B	B	B	B	A	B	B	B	B	A	B	B	A	B	B	B	B	A	B	B	B	A	A	B	A	A	B	B	B	B	B	B	A	B	A	B
Excalibur_c73970_243		IWB28698	1A	172.195	1A	344.88							A	B	B	B	B	A	B	B	B	B	A	B	B	A	B	B	B	B	A	B	B	B	A	A	B	A	A	B	B	B	B	B	B	A	B	A	B
Kukri_c19653_1370		IWB42176	1A	172.195	1A	288.41							A	B	B	B	B	A	B	B	B	B	A	B	B	A	B	B	B	B	A	B	B	B	A	A	B	A	A	B	B	B	B	B	B	A	B	A	B
Kukri_c82086_387		IWB47904	1A	172.195	1A	320.27					1A	163.481	A	B	B	B	B	A	B	B	B	B	A	B	B	A	B	B	B	B	A	B	B	B	A	A	B	A	A	B	B	B	B	B	B	A	B	A	B
RAC875_c21673_641		IWB55224	1A	172.195	1A	320.27					1A	181.466	A	B	B	B	B	A	B	B	B	B	A	B	B	A	B	B	B	B	A	B	B	B	A	A	B	A	A	B	B	B	B	B	B	A	B	A	B
RAC875_c36980_161		IWB57224	1A	172.195	1A	295.16							A	B	B	B	B	A	B	B	B	B	A	B	B	A	B	B	B	B	A	B	B	B	A	A	B	A	A	B	B	B	B	B	B	A	B	A	B
BS00030043_51		IWB7754	1A	172.195	1A	288.41			1A	71.7022			A	B	B	B	B	A	B	B	B	B	A	B	B	A	B	B	B	B	A	B	B	B	A	A	B	A	A	B	B	B	B	B	B	A	B	A	B
Ra_c8027_1021		IWB52703	1A	172.195	1A	327.89					1A	163.481	A	B	B	B	B	A	B	B	B	B	A	B	B	A	B	B	B	B	A	B	B	B	A	A	B	A	A	B	B	B	B	B	B	A	B	A	B
RAC875_c23586_541		IWB55536	1A	172.195	1A	344.88							A	B	B	B	B	A	B	B	B	B	A	B	B	A	B	B	B	B	A	B	B	B	A	A	B	A	A	B	B	B	B	B	B	A	B	A	B
RFL_Contig399_976		IWB64556	1A	172.195	1A	320.27			1A	73.027			A	B	B	B	B	A	B	B	B	B	A	B	B	A	B	B	B	B	A	B	B	B	A	A	B	A	A	B	B	B	B	B	B	A	B	A	B
Tdurum_contig51167_1029		IWB72159	1A	172.195	1A	342.52							A	B	B	B	B	A	B	B	B	B	A	B	B	A	B	B	B	B	A	B	B	B	A	A	B	A	A	B	B	B	B	B	B	A	B	A	B
Tdurum_contig56662_54		IWB72526	1A	172.553	1A	324.78							A	B	B	B	B	A	B	B	B	B	A	B	B	A	B	B	B	B	A	B	B	B	A	A	B	A	A	B	B	B	B	B	B	A	B	A	B
Excalibur_c16947_81		IWB22883	1A	172.553	1A	342.52							A	B	B	B	B	A	B	B	B	B	A	B	B	A	B	B	B	B	A	B	B	B	A	A	B	A	A	B	B	B	B	B	B	A	B	A	B
Tdurum_contig85466_170		IWB73690	1A	172.553	1A	358.29							A	B	B	B	B	A	B	B	B	B	A	B	B	A	B	B	B	B	A	B	B	B	A	A	B	A	A	B	B	B	B	B	B	A	B	A	B
wsnp_Ex_c28149_37293173		IWA3146	1A	172.553	1A	286.28							A	B	B	B	B	A	B	B	B	B	A	B	B	A	B	B	B	B	A	B	B	B	A	A	B	A	A	B	B	B	B	B	B	A	B	A	B
wsnp_Ra_c19637_28840370		IWA7707	1A	172.553	1A	356.99							A	B	B	B	B	A	B	B	B	B	A	B	B	A	B	B	B	B	A	B	B	B	A	A	B	A	A	B	B	B	B	B	B	A	B	A	B
CAP12_c3758_112		IWB13385	1A	172.553	1A	358.21							A	B	B	B	B	A	B	B	B	B	A	B	B	A	B	B	B	B	A	B	B	B	A	A	B	A	A	B	B	B	B	B	B	A	B	A	B
Kukri_c52420_112		IWB46250	1A	172.553									A	B	B	B	B	A	B	B	B	B	A	B	B	A	B	B	B	B	A	B	B	B	A	A	B	A	A	B	B	B	B	B	B	A	B	A	B
TA003411-0583		IWB65681	1A	172.553	1A	342.52							A	B	B	B	B	A	B	B	B	B	A	B	B	A	B	B	B	B	A	B	B	B	A	A	B	A	A	B	B	B	B	B	B	A	B	A	B
RAC875_c1599_342		IWB54198	1A	176.131	1A	368.61					1A	200.046	A	B	B	B	B	A	B	B	B	B	A	B	B	A	B	B	B	B	A	B	A	B	A	A	B	A	A	B	B	B	B	B	B	A	B	A	B
wsnp_JD_c6664_7807201		IWA6152	1A	176.251	1A	370.84					1A	200.385	A	B	B	B	B	A	B	B	B	B	A	B	B	A	B	B	B	B	A	B	A	B	A	A	B	A	A	B	B	B	B	B	B	A	B	A	B
BS00023114_51		IWB7430	1A	180.801	1A	374.02					1A	204.033	A	B	B	B	B	A	B	B	B	B	A	A	B	A	B	B	B	B	A	B	A	B	A	A	B	A	A	B	B	B	B	B	B	A	B	A	B
wsnp_Ex_c18499_27344859		IWA2317	1A	181.119	1A	373.94							A	B	B	B	B	A	B	B	B	B	A	A	B	A	B	B	B	B	A	B	A	B	A	A	B	A	A	B	B	B	B	B	B	A	B	A	B
BS00022824_51		IWB7275	1A	181.418	1A	374.52					1A	204.033	A	B	B	B	B	A	B	B	B	B	A	A	B	A	B	B	B	B	A	B	A	B	A	A	B	A	A	B	B	B	B	B	B	A	B	A	B
BobWhite_c39668_143		IWB3070	1A	181.986	1A	372.77							A	B	B	B	B	A	B	B	B	B	A	A	B	A	B	B	B	B	A	B	A	B	A	A	B	A	A	B	B	B	B	B	B	A	B	A	B
RAC875_c53725_217	TG0791	IWB58979	1A	182.295	1A	376.36	1A	184					A	B	B	B	B	A	B	B	B	B	A	A	B	A	B	B	B	B	A	B	A	B	A	A	B	A	A	B	B	B	B	B	B	A	B	A	B
wsnp_Ex_c9343_15514531	TG10771A	IWA4897	1A	182.431	1A	375.85	1A	184					A	B	B	B	B	A	B	B	B	B	A	A	B	A	B	B	B	B	A	B	A	B	A	A	B	A	A	B	B	B	B	B	B	A	B	A	B
wsnp_Ex_c9343_15514687	TG35701A	IWA4898	1A	182.639	1A	375.85	1A	184					A	B	B	B	B	A	B	B	B	B	A	A	B	A	B	B	B	B	A	B	A	B	A	A	B	A	A	B	B	B	B	B	B	A	B	A	B
Kukri_c20480_121		IWB42330	1A	182.89	1A	373.94							A	B	B	B	B	A	B	B	B	B	A	A	B	A	B	B	B	B	A	B	A	B	A	A	B	A	A	B	B	B	B	B	B	A	B	A	B
wsnp_Ex_c25730_34991010		IWA2994	1A	185.015	1A	375.02							A	B	B	B	B	A	B	B	B	B	A	A	B	A	B	B	B	B	A	B	A	B	A	A	B	A	A	B	B	B	B	B	B	A	B	A	B
wsnp_Ex_rep_c68058_66805898		IWA5491	1A	185.225	1A	377.67							A	B	B	B	B	A	B	B	B	B	A	A	B	A	B	B	B	B	A	B	A	B	A	A	B	A	A	B	B	B	B	B	B	A	B	A	B
wsnp_Ex_c9918_16332583		IWA4978	1A	185.225	1A	375.35					1A	207.766	A	B	B	B	B	A	B	B	B	B	A	A	B	A	B	B	B	B	A	B	A	B	A	A	B	A	A	B	B	B	B	B	B	A	B	A	B
BS00043441_51		IWB8339	1A	185.383	1A	374.52							A	B	B	B	B	A	B	B	B	B	A	A	B	A	B	B	B	B	A	B	A	B	A	A	B	A	A	B	B	B	B	B	B	A	B	A	B
wsnp_Ex_c3201_5910642		IWA3377	1A	186.761	1A	377.27					1A	207.087	A	B	B	B	B	A	B	B	B	B	A	A	B	A	B	B	B	B	A	B	A	B	A	A	B	A	A	B	B	B	B	B	B	A	B	A	B
wsnp_Ex_c3201_5910659		IWA3378	1A	186.998	1A	377.09							A	B	B	B	B	A	B	B	B	B	A	A	B	A	B	B	B	B	A	B	A	B	A	A	B	A	A	B	B	B	B	B	B	A	B	A	B
Kukri_c42544_213		IWB45252	1A	187.928									A	B	B	B	B	A	B	B	B	B	A	A	B	A	B	U	B	U	A	B	A	B	A	A	B	A	A	B	B	U	B	B	B	A	U	A	B
GENE-0171_87		IWB31719	1A	188.166	1A	432							A	B	B	B	B	A	B	B	B	B	A	A	B	A	B	B	B	B	A	B	A	B	A	A	B	A	A	B	B	B	B	B	B	A	B	A	B
RAC875_c68350_61		IWB60174	1A	188.166	1A	377.27			1A	1.32481	1A	206.833	A	B	B	B	B	A	B	B	B	B	A	A	B	A	B	B	B	B	A	B	A	B	A	A	B	A	A	B	B	B	B	B	B	A	B	A	B
wsnp_Ex_c48407_53323483		IWA4021	1A	188.166	1A	377.27					1A	206.833	A	B	B	B	B	A	B	B	B	B	A	A	B	A	B	B	B	B	A	B	A	B	A	A	B	A	A	B	B	B	B	B	B	A	B	A	B
BS00011521_51		IWB6426	1A	188.327	1A	377.27			1A	1.32481			A	B	B	B	B	A	B	B	B	B	A	A	B	A	B	B	B	B	A	B	A	B	A	A	B	A	A	B	B	B	B	B	B	A	B	A	B
Kukri_c310_1953		IWB43929	1A	189.225	1A	377.49							A	B	B	B	B	A	B	B	B	B	A	A	B	A	B	B	B	B	A	B	A	B	A	A	B	A	A	B	B	B	B	B	B	A	B	A	B
GENE-0171_133		IWB31718	1A	189.351							1A	221.425	A	B	B	B	B	A	B	B	B	B	A	A	B	A	B	B	B	B	A	B	A	B	A	A	B	A	A	B	B	B	B	B	B	A	B	A	B
RAC875_c52947_338		IWB58885	1A	191.919	1A	432.13							A	B	B	B	B	A	B	B	B	B	A	A	B	A	B	B	B	B	A	B	A	B	B	A	B	A	A	B	B	B	B	B	B	A	B	A	B
IACX882		IWB36325	1A	192.075	1A	379.26							A	B	B	B	B	A	B	B	B	B	A	A	B	A	B	B	B	B	A	B	A	B	B	A	B	A	A	B	B	B	B	B	B	A	B	A	B
CAP11_c1500_171		IWB12695	1A	193.123	1A	432.13							A	B	B	B	B	A	B	B	B	B	A	A	B	A	B	B	B	B	A	B	A	B	B	A	B	A	A	B	B	B	B	B	B	A	B	A	B
Ku_c23222_204		IWB38851	1A	193.355	1A	431.86							A	B	B	B	B	A	B	B	B	B	A	A	B	A	B	B	B	B	A	B	A	B	B	A	B	A	A	B	B	B	B	B	B	A	B	A	B
Ra_c1295_635		IWB51036	1A	193.583	1A	431.86							A	B	B	B	B	A	B	B	B	B	A	A	B	A	B	B	B	B	A	B	A	B	B	A	B	A	A	B	B	B	B	B	B	A	B	A	B
wsnp_Ra_c6891_11974621		IWA8051	1A	193.805	1A	432.13							A	B	B	B	B	A	B	B	B	B	A	A	B	A	B	B	B	B	A	B	A	B	B	A	B	A	A	B	B	B	B	B	B	A	B	A	B
wsnp_Ex_rep_c66872_65273203		IWA5317	1A	194.528	1A	380.8					1A	206.493	A	B	B	B	B	A	B	B	B	B	A	A	B	A	B	B	B	B	A	B	A	B	B	A	B	A	A	B	B	B	B	B	B	A	B	A	B
wsnp_JD_rep_c65095_41464278		IWA6312	1A	194.528	1A	380.47					1A	206.493	A	B	B	B	B	A	B	B	B	B	A	A	B	A	B	B	B	B	A	B	A	B	B	A	B	A	A	B	B	B	B	B	B	A	B	A	B
wsnp_Ku_rep_c69362_68705297		IWA7453	1A	194.528	1A	380.47					1A	206.154	A	B	B	B	B	A	B	B	B	B	A	A	B	A	B	B	B	B	A	B	A	B	B	A	B	A	A	B	B	B	B	B	B	A	B	A	B
Excalibur_c85499_232		IWB29142	1A	194.678	1A	379.87					1A	206.154	A	B	B	B	B	A	B	B	B	B	A	A	B	A	B	B	B	B	A	B	A	B	B	A	B	A	A	B	B	B	B	B	B	A	B	A	B
wsnp_Ex_rep_c66872_65273904		IWA5319	1A	194.822	1A	379.87					1A	206.154	A	B	B	B	B	A	B	B	B	B	A	A	B	A	B	B	B	B	A	B	A	B	B	A	B	A	A	B	B	B	B	B	B	A	B	A	B
wsnp_Ex_rep_c69932_68893867		IWA5660	1A	194.937	1A	380.8					1A	206.493	A	B	B	B	B	A	B	B	B	B	A	A	B	A	B	B	B	B	A	B	A	B	B	A	B	A	A	B	B	B	B	B	B	A	B	A	B
Kukri_c19837_432		IWB42215	1A	195.506	1A	381.33					1A	206.833	A	B	B	B	B	A	B	B	B	B	A	A	B	A	B	B	B	B	A	B	A	B	B	A	B	A	A	B	B	B	B	B	B	A	B	A	B
BS00065170_51	TG37341A	IWB9474	1A	195.506	1A	380.83	1A	185.1			1A	206.833	A	B	B	B	B	A	B	B	B	B	A	A	B	A	B	B	B	B	A	B	A	B	B	A	B	A	A	B	B	B	B	B	B	A	B	A	B
IAAV1930	TG1680	IWB34474	1A	196.093	1A	384.81	1A	185.7			1A	206.833	A	B	B	B	B	A	B	B	B	B	A	A	B	A	B	B	B	B	A	B	A	B	B	A	B	A	A	B	B	B	B	B	B	A	B	A	B
Kukri_c17412_1249		IWB41758	1A	196.093	1A	384.76					1A	216.928	A	B	B	B	B	A	B	B	B	B	A	A	B	A	B	B	B	B	A	B	A	B	B	A	B	A	A	B	B	B	B	B	B	A	B	A	B
IAAV2844		IWB34620	1A	196.093	1A	384.7					1A	217.946	A	B	B	B	B	A	B	B	B	B	A	A	B	A	B	B	B	B	A	B	A	B	B	A	B	A	A	B	B	B	B	B	B	A	B	A	B
IAAV6100	TG27481A	IWB35143	1A	196.093	1A	382.47	1A	185.7			1A	206.833	A	B	B	B	B	A	B	B	B	B	A	A	B	A	B	B	B	B	A	B	A	B	B	A	B	A	A	B	B	B	B	B	B	A	B	A	B
wsnp_Ex_c15377_23637176	TG22211A	IWA2015	1A	196.093	1A	382.08	1A	185.7					A	B	B	B	B	A	B	B	B	B	A	A	B	A	B	B	B	B	A	B	A	B	B	A	B	A	A	B	B	B	B	B	B	A	B	A	B
wsnp_Ex_c36911_44767554		IWA3590	1A	196.093	1A	382.47					1A	206.833	A	B	B	B	B	A	B	B	B	B	A	A	B	A	B	B	B	B	A	B	A	B	B	A	B	A	A	B	B	B	B	B	B	A	B	A	B
wsnp_Ex_rep_c103474_88421290		IWA5097	1A	196.093	1A	382.15					1A	206.833	A	B	B	B	B	A	B	B	B	B	A	A	B	A	B	B	B	B	A	B	A	B	B	A	B	A	A	B	B	B	B	B	B	A	B	A	B
Tdurum_contig893_53		IWB73748	1A	196.093	1A	384.81			1A	0	1B	178.5	A	B	B	B	B	A	B	B	B	B	A	A	B	A	B	B	B	B	A	B	A	B	B	A	B	A	A	B	B	B	B	B	B	A	B	A	B
RAC875_rep_c71278_345	TG12911A	IWB62774	1A	196.093	1A	384.81	1A	186.8					A	B	B	B	B	A	B	B	B	B	A	A	B	A	B	B	B	B	A	B	A	B	B	A	B	A	A	B	B	B	B	B	B	A	B	A	B
BobWhite_c45316_290		IWB3449	1A	196.093	1A	414.72							A	B	B	B	B	A	B	B	B	B	A	A	B	A	B	B	B	B	A	B	A	B	B	A	B	A	A	B	B	B	B	B	B	A	B	A	B
RAC875_c43002_382		IWB57894	1A	198.271	1A	382.47							A	B	B	B	B	A	B	B	B	B	A	A	B	A	B	B	B	B	A	B	A	B	B	A	B	A	A	B	B	B	B	B	B	A	B	A	B
Jagger_c2379_114		IWB36489	1A	198.595	1A	385.82							A	B	B	B	B	A	B	B	B	B	A	A	B	A	B	B	B	B	A	B	A	B	B	A	B	A	A	B	B	B	B	B	B	A	B	A	B
BS00067221_51		IWB9993	1A	199.089	1A	413.98					1A	208.699	A	B	B	B	B	A	B	B	B	B	A	A	B	A	B	B	B	B	A	B	A	B	B	A	B	A	A	B	B	B	B	B	B	A	B	A	B
CAP12_rep_c5332_341		IWB13624	1A	199.432	1D	325.56							A	B	B	B	B	A	B	B	B	B	A	A	B	A	B	B	B	B	A	B	A	B	B	A	B	A	A	B	B	B	B	B	B	A	B	A	B
Kukri_c47559_289		IWB45781	1A	202.058	1A	414.11							A	B	U	B	B	A	U	B	B	B	A	A	B	A	B	B	B	B	A	B	A	B	B	A	B	A	A	B	B	B	B	A	B	A	U	A	U
BS00063847_51		IWB9141	1A	202.274	1A	414.19			1A	0			A	B	B	B	B	A	B	B	B	B	A	A	B	A	B	B	B	B	A	B	A	B	B	A	B	A	A	B	B	B	B	A	B	A	B	A	B
BS00062759_51	TG3721	IWB8918	1A	203.54	1A	414.38	1A	190.2			1A	208.105	A	B	B	B	B	A	B	B	B	B	A	A	B	A	B	B	B	B	A	B	A	B	B	A	B	A	A	B	B	B	B	A	B	A	B	A	B
IAAV2162		IWB34513	1A	203.54	1A	403.43					1A	208.105	A	B	B	B	B	A	B	B	B	B	A	A	U	A	B	B	B	B	A	U	A	B	B	A	B	A	A	B	B	B	B	A	B	A	B	A	B
BS00070695_51	TG03461A	IWB10491	1A	203.54	1A	404.15	1A	189.1			1A	208.105	A	B	B	B	B	A	B	B	B	B	A	A	B	A	B	B	B	B	A	B	A	B	B	A	B	A	A	B	B	B	B	A	B	A	B	A	B
Excalibur_c27376_74		IWB24575	1A	203.54	1A	397.67					1A	208.105	A	B	B	B	B	A	B	B	B	B	A	A	B	A	B	B	B	B	A	B	A	B	B	A	B	A	A	B	B	B	B	A	B	A	B	A	B
BS00067170_51		IWB9978	1A	203.807	1A	403.13					1A	208.105	A	B	B	B	B	A	B	B	B	B	A	A	B	A	B	B	B	B	A	B	A	B	B	A	B	A	A	B	B	B	B	A	B	A	B	A	B
Tdurum_contig11349_810	TG0894	IWB67027	1A	203.807	1A	397.71	1A	188.5			1A	208.105	A	B	B	B	B	A	B	B	B	B	A	A	B	A	B	B	B	B	A	B	A	B	B	A	B	A	A	B	B	B	B	A	B	A	B	A	B
Excalibur_rep_c67492_1119		IWB30871	1A	203.807	1A	398.08					1A	208.699	A	B	B	B	B	A	B	B	B	B	A	A	B	A	B	B	B	B	A	B	A	B	B	A	B	A	A	B	B	B	B	A	B	A	B	A	B
Kukri_rep_c115657_255		IWB49684	1A	203.941	1A	400.48					1A	209.038	A	B	B	B	B	A	B	B	B	B	A	A	B	A	B	B	B	B	A	B	A	B	B	A	B	A	A	B	B	B	B	A	B	A	B	A	B
Kukri_c4204_1346		IWB45182	1A	204.075	1A	398.08					1A	208.699	A	B	B	B	B	A	B	B	B	B	A	A	B	A	B	B	B	B	A	B	A	B	B	A	B	A	A	B	B	B	B	A	B	A	B	A	B
GENE-0543_1074	TG0514	IWB31955	1A	204.208	1A	398.08	1A	188.5			1A	208.105	A	B	B	B	B	A	B	B	B	B	A	A	B	A	B	B	B	B	A	B	A	B	B	A	B	A	A	B	B	B	B	A	B	A	B	A	B
BS00070991_51	TG03471A	IWB10518	1A	204.342	1A	404.15	1A	189.1			1A	208.105	A	B	B	B	B	A	B	B	B	B	A	A	B	A	B	B	B	B	A	B	A	B	B	A	B	A	A	B	B	B	B	A	B	A	B	A	B
BS00064087_51		IWB9191	1A	204.476	1A	397.67					1A	208.699	A	B	B	B	B	A	B	B	B	B	A	A	B	A	B	B	B	B	B	B	A	B	B	A	B	A	A	B	B	B	B	A	B	A	B	A	B
Excalibur_c12932_2102	TG2611	IWB22174	1A	204.609	1A	398.08	1A	188.5			1A	208.105	A	B	B	B	B	A	B	B	B	B	A	A	B	A	B	B	B	B	A	B	A	B	B	A	B	A	A	B	B	B	B	A	B	A	B	A	B
GENE-0543_113		IWB31956	1A	204.743	1A	398.08					1A	209.038	A	B	B	B	B	A	B	B	B	B	A	A	B	A	B	B	B	B	A	B	A	B	B	A	B	A	A	B	B	B	B	A	B	A	B	A	B
Kukri_c4204_1673	TG2850	IWB45183	1A	204.877	1A	398.08	1A	188.5			1A	223.8	A	B	B	B	B	A	B	B	B	B	A	A	B	A	B	B	B	B	A	B	A	B	B	A	B	A	A	B	B	B	B	A	B	A	B	A	B
Kukri_c4204_1946		IWB45184	1A	205.01	1A	398.08					1A	208.105	A	B	B	B	B	A	B	B	B	B	A	A	B	A	B	B	B	B	A	B	A	B	B	A	B	A	A	B	B	B	B	A	B	A	B	A	B
wsnp_Ex_c12932_20486842		IWA1710	1A	205.144	1A	400.48					1A	208.105	A	B	B	B	B	A	B	B	B	B	A	A	B	A	B	B	B	B	A	B	A	B	B	A	B	A	A	B	B	B	B	A	B	A	B	A	B
Excalibur_c46365_442		IWB26766	1A	205.278	1A	397.67					1A	211.244	A	B	B	B	B	A	B	B	B	B	A	A	B	A	B	B	B	B	A	B	A	B	B	A	B	A	A	B	B	B	B	A	B	A	B	A	B
BS00075271_51		IWB10791	1A	205.411	1A	404.15					1A	208.105	A	B	B	B	B	A	B	B	B	B	A	A	B	A	B	B	B	B	A	B	A	B	B	A	B	A	A	B	B	B	B	A	B	A	B	A	B
Excalibur_c46365_304	TG3867	IWB26765	1A	205.545	1A	397.71	1A	188.5			1A	208.105	A	B	B	B	B	A	B	B	B	B	A	A	B	A	B	B	B	B	A	B	A	B	B	A	B	A	A	B	B	B	B	A	B	A	B	A	B
GENE-0543_577		IWB31958	1A	205.679	1A	400.32					1A	207.766	A	B	B	B	B	A	B	B	B	B	A	A	B	A	B	B	B	B	A	B	A	B	B	A	B	A	A	B	B	B	B	A	B	A	B	A	B
Ku_c32704_43		IWB39186	1A	205.812	1A	404.15			1A	0	1A	208.105	A	B	B	B	B	A	B	B	B	B	A	A	B	A	B	B	B	B	A	B	A	B	B	A	B	A	A	B	B	B	B	A	B	A	B	A	B
RAC875_c5119_2696		IWB58726	1A	205.946	1A	397.71					1A	208.105	A	B	B	B	B	A	B	B	B	B	A	A	B	A	B	B	B	B	A	B	A	B	B	A	B	A	A	B	B	B	B	A	B	A	B	A	B
wsnp_Ex_rep_c67492_66096650		IWA5407	1A	206.08	1A	401.89					1A	208.105	A	B	B	B	B	A	B	B	B	B	A	A	B	A	B	B	B	B	A	B	A	B	B	A	B	A	A	B	B	B	B	A	B	A	B	A	B
Kukri_rep_c69829_735		IWB49951	1A	206.214	1A	397.67					1A	211.244	A	B	B	B	B	A	B	B	B	B	A	A	B	A	B	B	B	B	A	B	A	B	B	A	B	A	A	B	B	B	B	A	B	A	B	A	B
RAC875_c63359_1446		IWB59763	1A	206.36	1A	400.29					1A	208.105	A	B	B	B	B	A	B	B	B	B	A	A	B	A	B	B	B	B	A	B	A	B	B	A	B	A	A	B	B	B	B	A	B	A	B	A	B
IAAV3217		IWB34683	1A	211.575	1A	426.98							A	B	B	B	B	A	B	B	B	B	U	A	B	A	B	B	B	B	B	B	A	B	B	B	B	A	U	B	B	B	B	A	B	U	B	U	B
Excalibur_c12819_216		IWB22154	1A	211.575	1A	419.27							A	B	B	B	B	A	B	B	B	B	A	A	B	A	B	B	B	B	B	B	A	B	B	B	B	A	A	B	B	B	B	A	B	A	B	A	B
wsnp_Ku_c754_1557338		IWA7289	1A	211.575	1A	418.18							A	B	B	B	B	A	B	B	B	B	A	A	B	A	B	B	B	B	B	B	A	B	B	B	B	A	A	B	B	B	B	A	B	A	B	A	B
BS00011913_51		IWB6493	1A	211.575	1A	418.76							A	B	B	B	B	A	B	B	B	B	A	A	B	A	B	B	B	B	B	B	A	B	B	B	B	A	A	B	B	B	B	A	B	A	B	A	B
D_contig12592_200		IWB15653	1A	211.575	1A	418.27							A	B	B	B	B	A	B	B	B	B	A	A	B	A	B	B	B	B	B	B	A	B	B	B	B	A	A	B	B	B	B	A	B	A	B	A	B
JD_c394_819		IWB37412	1A	211.575	1A	426.98							A	B	B	B	B	A	B	B	B	B	A	A	B	A	B	B	B	B	B	B	A	B	B	B	B	A	A	B	B	B	B	A	B	A	B	A	B
TA003848-0787		IWB65748	1A	211.575	1A	426.38							A	B	B	B	B	A	B	B	B	B	A	A	B	A	B	B	B	B	B	B	A	B	B	B	B	A	A	B	B	B	B	A	B	A	B	A	B
BS00054271_51		IWB8643	1A	211.575	1A	426.38							A	B	B	B	B	A	B	B	B	B	A	A	B	A	B	B	B	B	B	B	A	B	B	B	B	A	A	B	B	B	B	A	B	A	B	A	B
RAC875_rep_c120646_120		IWB62521	1A	211.575	1A	418.76							A	B	B	B	B	A	B	B	B	B	A	A	B	A	B	B	B	B	B	B	A	B	B	B	B	A	A	B	B	B	B	A	B	A	B	A	B
RAC875_c5882_307		IWB59404	1A	211.575	1A	418.76							A	B	B	B	B	A	B	B	B	B	A	A	B	A	B	B	B	B	B	B	A	B	B	B	B	A	A	B	B	B	B	A	B	A	B	A	B
BobWhite_c44947_277		IWB3413	1A	211.575	1A	418.27							A	B	B	B	B	A	B	B	B	B	A	A	B	A	B	B	B	B	B	B	A	B	B	B	B	A	A	B	B	B	B	A	B	A	B	A	B
IAAV4435	TG2740	IWB34872	1A	211.575	1A	418.27	1A	190.8					A	B	B	B	B	A	B	B	B	B	A	A	B	A	B	B	B	B	B	B	A	B	B	B	B	A	A	B	B	B	B	A	B	A	B	A	B
BS00023419_51		IWB7490	1A	211.807	1A	419.27							A	B	B	B	B	A	B	B	B	B	A	A	B	A	B	B	B	B	B	B	A	B	B	B	B	A	A	B	B	B	B	A	B	A	B	A	B
Kukri_c21396_771		IWB42490	1A	211.807	1A	426.29							A	B	B	B	B	A	B	B	B	B	A	A	B	A	B	B	B	B	B	B	A	B	B	B	B	A	A	B	B	B	B	A	B	A	B	A	B
Excalibur_c26495_84		IWB24447	1A	213.145	1D	312.49							A	B	B	B	B	A	B	B	B	B	A	A	B	A	B	B	B	B	B	B	A	B	B	B	B	A	B	B	B	B	B	A	B	A	B	A	B
Kukri_c3987_386		IWB44964	1A	213.145	1D	291.03							A	B	B	B	B	A	B	B	B	B	A	A	B	A	B	B	B	B	B	B	A	B	B	B	B	A	B	B	B	B	B	A	B	A	B	A	B
wsnp_Ex_c412_814247		IWA3764	1A	213.145	1A	425.84					1A	209.293	A	B	B	B	B	A	B	B	B	B	A	A	B	A	B	B	B	B	B	B	A	B	B	B	B	A	B	B	B	B	B	A	B	A	B	A	B
BS00022797_51		IWB7260	1A	213.96	1A	427.62					1A	209.293	A	B	B	B	B	A	B	B	B	B	A	A	B	A	B	B	B	B	B	B	A	B	B	B	B	A	B	B	B	B	B	A	B	A	B	A	B
Kukri_rep_c72138_101		IWB50170	1A	213.96	1D	312.49							A	B	B	B	B	A	B	B	B	B	A	A	B	A	B	B	B	B	B	B	A	B	B	B	B	A	B	B	B	B	B	A	B	A	B	A	B
IAAV1301		IWB34353	1A	213.96	1A	420.27					1A	209.293	A	B	B	B	B	A	B	B	B	B	A	A	B	A	B	B	B	B	B	B	A	B	B	B	B	A	B	B	B	B	B	A	B	A	B	A	B
Excalibur_c26495_567		IWB24446	1A	213.96	1D	312.49							A	B	B	B	B	A	B	B	B	B	A	A	B	A	B	B	B	B	B	B	A	B	B	B	B	A	B	B	B	B	B	A	B	A	B	A	B
wsnp_Ku_c330_683203		IWA6916	1A	213.96	1A	425.53							A	B	B	B	B	A	B	B	B	B	A	A	B	A	B	B	B	B	B	B	A	B	B	B	B	A	B	B	B	B	B	A	B	A	B	A	B
wsnp_Ex_c1255_2411550		IWA1644	1A	213.96	1A	425.35							A	B	B	B	B	A	B	B	B	B	A	A	B	A	B	B	B	B	B	B	A	B	B	B	B	A	B	B	B	B	B	A	B	A	B	A	B
wsnp_Ex_c52086_55808193		IWA4121	1A	213.96	1A	427.08							A	B	B	B	B	A	B	B	B	B	A	A	B	A	B	B	B	B	B	B	U	B	B	B	B	A	B	B	B	B	B	A	B	A	B	A	B
wsnp_Ex_rep_c67474_66076379		IWA5405	1A	213.96	1A	427.87					1A	207.766	A	B	B	B	B	A	B	B	B	B	A	A	B	A	B	B	B	B	B	B	A	B	B	B	B	A	B	B	B	B	B	A	B	A	B	A	B
Kukri_c22011_1447		IWB42582	1A	213.96	1A	415.63					1A	209.632	A	B	B	B	B	A	B	B	B	B	A	A	B	A	B	B	B	B	B	B	A	B	B	B	B	A	B	B	B	B	B	A	B	A	B	A	B
Ra_c56010_289		IWB52266	1A	213.96	1A	426.98							A	B	B	B	B	A	B	B	B	B	A	A	B	A	B	B	B	B	B	B	A	B	B	B	B	A	B	B	B	B	B	A	B	A	B	A	B
RAC875_c29059_648		IWB56272	1A	213.96	1A	427.08					1A	210.311	A	B	B	B	B	A	B	B	B	B	A	A	B	A	B	B	B	B	B	B	A	B	B	B	B	A	B	B	B	B	B	A	B	A	B	A	B
wsnp_Ex_c52086_55808126		IWA4120	1A	213.96	1A	427.08					1A	209.632	A	B	B	B	B	A	B	B	B	B	A	A	B	A	B	B	B	B	B	B	A	B	B	B	B	A	B	B	B	B	B	A	B	A	B	A	B
RAC875_c43389_105		IWB57932	1A	213.96	1A	427.08					1A	215.401	A	B	B	B	B	A	B	B	B	B	A	A	B	A	B	B	B	B	B	B	A	B	U	B	B	A	B	B	B	B	B	A	B	A	B	A	B
RAC875_c85550_291		IWB60807	1A	213.96	1A	426.98							A	B	B	B	B	A	B	B	B	B	A	A	B	A	B	B	B	B	B	B	A	B	B	B	B	A	B	B	B	B	B	A	B	A	B	A	B
RAC875_c85550_73		IWB60809	1A	213.96	1A	427.62					1A	209.632	A	B	B	B	B	A	B	B	U	B	A	A	B	A	B	B	B	B	B	B	A	B	B	B	B	A	B	B	B	B	B	A	B	A	B	A	B
BS00021780_51		IWB6759	1A	214.193	1A	432.13					1A	209.632	A	B	B	B	B	A	B	B	B	B	A	A	B	A	B	B	B	B	B	B	A	B	B	B	B	A	B	B	B	B	B	A	B	A	B	A	B
RAC875_rep_c71921_672		IWB62818	1A	214.193	1A	432.13					1A	209.632	A	B	B	B	B	A	B	B	B	B	A	A	B	A	B	B	B	B	B	B	A	B	B	B	B	A	B	B	B	B	B	A	B	A	B	A	B
wsnp_Ex_c3887_7051325		IWA3661	1A	214.193	1A	428.22					1A	209.632	A	B	B	B	B	A	B	B	B	B	A	A	B	A	B	B	B	B	B	B	A	B	B	B	B	A	B	B	B	B	B	A	B	A	B	A	B
RAC875_c20823_707		IWB55070	1A	214.193	1A	432.13					1A	209.632	A	B	B	B	B	A	B	B	B	B	A	A	B	A	B	B	B	B	B	B	A	B	B	B	B	A	B	B	B	B	B	A	B	A	B	A	B
RFL_Contig2961_1806		IWB64147	1A	214.193	1A	432.13					1A	209.632	A	B	B	B	B	A	B	B	B	B	A	A	B	A	B	B	B	B	B	B	A	B	B	B	B	A	B	B	B	B	B	A	B	A	B	A	B
wsnp_Ex_c46670_52108070	TG10551A	IWA3977	1A	214.995	1A	428.22	1A	193.6					A	B	B	B	B	A	B	B	B	B	A	A	B	A	B	B	B	B	B	B	A	B	B	B	B	A	B	B	B	B	B	A	B	A	B	A	B
BobWhite_c66315_505	TG1389	IWB4201	1A	214.995	1A	415.63	1A	193.6					A	B	B	B	B	A	B	B	B	B	A	A	B	A	B	B	B	B	B	B	A	B	B	B	B	A	B	B	B	B	B	A	B	A	B	A	B
RFL_Contig4538_484		IWB64713	1A	214.995	1A	417.38					1A	213.195	A	B	B	B	B	A	B	B	B	B	A	A	B	A	B	B	B	B	B	B	A	B	B	B	B	A	B	B	B	B	B	A	B	A	B	A	B
BS00032855_51		IWB7910	1A	216.065	1A	423.31							A	B	B	B	B	A	B	B	B	B	A	A	B	A	B	B	B	B	B	B	A	B	B	B	B	A	B	B	B	B	B	A	B	A	B	A	B
wsnp_Ex_c34694_42959047		IWA3492	1A	216.065	1A	427.62							A	B	B	B	B	A	B	B	B	B	A	A	B	A	B	B	B	B	B	B	A	B	B	B	B	A	B	B	B	B	B	A	B	A	B	A	B
Excalibur_rep_c71271_247		IWB31181	1A	216.065	1A	423.31							A	B	B	B	B	A	B	B	B	B	A	A	B	A	B	B	B	B	B	B	A	B	B	B	B	A	B	B	B	B	B	A	B	A	B	A	B
Tdurum_contig5560_193		IWB72461	1A	216.065	1A	423.31					1B	184.5	A	B	B	B	B	A	B	B	B	B	A	A	B	A	B	B	B	B	B	B	A	B	B	B	B	A	B	B	B	B	B	A	B	A	B	A	B
IAAV1066		IWB34317	1A	216.065									A	B	B	B	B	A	B	B	B	B	A	A	B	A	B	B	B	B	B	B	A	B	B	B	B	A	B	B	B	B	B	A	B	A	B	A	B
Ku_c17338_1338		IWB38590	1A	216.065	1A	426.98							A	B	B	B	B	A	B	B	B	B	A	A	B	A	B	B	B	B	B	B	A	B	B	B	B	A	B	B	B	B	B	A	B	A	B	A	B
Ku_c72511_106		IWB39956	1A	216.065	1A	427.81							A	B	B	B	B	A	B	B	B	B	A	A	B	A	B	B	B	B	B	B	A	B	B	B	B	A	B	B	B	B	B	A	B	A	B	A	B
Tdurum_contig47006_1105		IWB71743	1A	216.332	1A	399.28					1A	209.972	A	B	B	B	B	A	B	B	B	B	A	A	B	A	B	B	B	B	B	B	A	B	B	B	B	A	B	B	B	B	B	A	B	A	B	A	B
Excalibur_c17004_1396		IWB22896	1A	216.332	1A	411.12					1A	209.632	A	B	B	B	B	A	B	B	B	B	A	A	B	A	B	B	B	B	B	B	A	B	B	B	B	A	B	B	B	B	B	A	B	A	B	A	B
Tdurum_contig47006_2711		IWB71745	1A	216.332	1A	428.22					1A	209.632	A	B	B	B	B	A	B	B	B	B	A	A	B	A	B	B	B	B	B	B	A	B	B	B	B	A	B	B	B	B	B	A	B	A	B	A	B
wsnp_Ex_c2918_5381441		IWA3215	1A	216.332	1A	411.62					1A	209.632	A	B	B	B	B	A	B	B	B	B	A	A	B	A	B	B	B	B	B	B	A	B	B	B	B	A	U	B	B	B	B	A	B	A	B	A	B
Kukri_c18608_135		IWB41992	1A	216.332	1A	432.63					1A	209.972	A	B	B	B	B	A	B	B	B	B	A	A	B	A	B	B	B	B	B	B	A	B	B	B	B	A	B	B	B	B	B	A	B	A	B	A	B
RAC875_c32874_517		IWB56775	1B	0									A	B	B	B	A	A	A	A	A	A	B	U	A	U	A	B	A	A	A	A	A	B	A	A	A	A	U	A	B	A	B	B	A	A	A	A	U
Tdurum_contig95782_945		IWB73945	1B	10.818	1B	76.33							A	B	B	B	A	B	A	A	A	B	B	A	A	B	A	B	A	B	B	A	A	B	A	A	A	A	B	A	B	A	B	B	A	A	A	A	A
RAC875_c67826_84		IWB60129	1B	11.363	1B	28.29					7A	153.416	A	B	B	B	A	B	A	A	A	B	B	A	A	B	A	B	A	B	B	A	A	B	A	A	A	A	B	A	B	A	B	B	A	A	A	A	A
D_GA8KES402HUUGV_172		IWB17897	1B	11.363	1D	80.54							A	B	B	B	A	B	A	A	A	B	B	A	A	B	A	B	A	B	B	A	A	B	A	A	A	A	B	A	B	A	B	B	A	A	A	A	A
Excalibur_c10065_570		IWB21518	1B	11.72	1A	72.7							A	B	B	B	A	U	A	A	A	U	B	A	A	U	A	B	A	B	B	A	A	B	A	A	A	A	U	A	B	A	U	B	A	A	A	A	A
Excalibur_rep_c75168_337		IWB31245	1B	11.984	1B	160.39							A	B	B	B	A	B	A	A	A	B	B	A	A	B	A	B	A	B	B	A	A	B	A	A	A	A	B	A	B	A	B	B	A	A	A	A	A
Kukri_c3181_2340		IWB44021	1B	12.147	1B	160.39							A	B	B	B	A	B	A	A	A	B	B	A	A	B	A	B	A	B	B	A	A	B	A	A	A	A	B	A	B	A	B	B	A	A	A	A	A
IAAV6888		IWB35264	1B	12.147	1B	160.58							A	B	B	B	A	B	A	A	A	B	B	A	A	B	A	B	A	B	B	A	A	B	A	A	A	A	B	A	B	A	B	B	A	A	A	A	A
IAAV1312	TG3940	IWB34356	1B	12.147	1B	154.59	1B	3.4					A	B	B	B	A	B	A	A	A	B	B	A	A	B	A	B	A	B	B	A	A	B	A	A	A	A	B	A	B	A	B	B	A	A	A	A	A
GENE-4063_410		IWB33756	1B	12.147	1B	160.58							A	B	B	B	A	B	A	A	A	B	B	A	A	B	A	B	A	B	B	A	A	B	A	A	A	A	B	A	B	A	B	B	A	A	A	A	A
GENE-0074_370		IWB31655	1B	12.147	1B	160.58							A	B	B	B	A	B	A	A	A	B	B	A	A	B	A	B	A	B	B	A	A	B	A	A	A	A	B	A	B	A	B	B	A	A	A	A	A
Excalibur_c46114_728		IWB26732	1B	12.147	1B	160.39							A	B	B	B	A	B	A	A	A	B	B	A	A	B	A	B	A	B	B	A	A	B	A	A	A	A	B	A	B	A	B	B	A	A	A	A	A
Excalibur_c3959_118	TG3854	IWB26059	1B	12.147	1B	160.39	1B	8.6			6B	240	A	B	B	B	A	B	A	A	A	B	B	A	A	B	A	B	A	B	B	A	A	B	A	A	A	A	B	A	B	A	B	B	A	A	A	A	A
Ex_c4206_502		IWB20686	1B	12.147	1B	161.52							A	B	B	B	A	B	A	A	A	B	B	A	A	B	A	B	A	B	B	A	A	B	A	A	A	A	B	A	B	A	B	B	A	A	A	A	A
BS00074369_51		IWB10734	1B	12.147	1B	160.39							A	B	B	B	A	B	A	A	A	B	B	A	A	B	A	B	A	B	B	A	A	B	A	A	A	A	B	A	B	A	B	B	A	A	A	A	A
BS00022180_51	TG36721B	IWB6951	1B	12.147	1B	14.7	1B	3.4					A	B	B	B	A	B	A	A	A	B	B	A	A	B	A	B	A	B	B	A	A	B	A	A	A	A	B	A	B	A	B	B	A	A	A	A	A
RAC875_c29598_147		IWB56359	1B	12.147	1A	65.31							A	B	B	B	A	B	A	A	A	B	B	A	A	B	A	B	A	B	B	A	A	B	A	A	A	A	B	A	B	A	B	B	A	A	A	A	A
JD_c12243_360	TG17241D	IWB36940	1B	12.147	1B	160.58	1B	3.4					A	B	B	B	A	B	A	A	A	B	B	A	A	B	A	B	A	B	B	A	A	B	A	A	A	A	B	A	B	A	B	B	A	A	A	A	A
IACX778		IWB36240	1B	12.147	1B	160.4							A	B	B	B	A	B	A	A	A	B	B	A	A	B	A	B	A	B	B	A	A	B	A	A	A	A	B	A	B	A	B	B	A	A	A	A	A
IACX20627		IWB35833	1B	12.147	1B	160.58							A	B	B	B	A	B	A	A	A	B	B	A	A	B	A	B	A	B	B	A	A	B	A	A	A	A	B	A	B	A	B	B	A	A	A	A	A
IAAV8883		IWB35554	1B	12.147	1B	154.59							A	B	B	B	A	B	A	A	A	B	B	A	A	B	A	B	A	B	B	A	A	B	A	A	A	A	B	A	B	A	B	B	A	A	A	A	A
GENE-0249_161		IWB31764	1B	12.147	1A	81.33							A	B	B	B	A	B	A	A	A	B	B	A	A	B	A	B	A	B	B	A	A	B	A	A	A	A	B	A	B	A	B	B	A	A	A	A	A
GENE-0074_455		IWB31656	1B	12.147	1B	154.59							A	B	B	B	A	B	A	A	A	B	B	A	A	B	A	B	A	B	B	A	A	B	A	A	A	A	B	A	B	A	B	B	A	A	A	A	A
Excalibur_c55959_710		IWB27615	1B	12.147	1B	74.76							A	B	B	B	A	B	A	A	A	B	B	A	A	B	A	B	A	B	B	A	A	B	A	A	A	A	B	A	B	A	B	B	A	A	A	A	A
Excalibur_c16851_835		IWB22868	1B	12.147	1B	54.32							A	B	B	B	A	B	A	A	A	B	B	A	A	B	A	B	A	B	B	A	A	B	A	A	A	A	B	A	B	A	B	B	A	A	A	A	A
BS00091688_51		IWB11726	1B	12.147	1B	160.39							A	B	B	B	A	B	A	A	A	B	B	A	A	B	A	B	A	B	B	A	A	B	A	A	A	A	B	A	B	A	B	B	A	A	A	A	A
BS00082566_51		IWB11263	1B	12.147	1A	22.23							A	B	B	B	A	B	A	A	A	B	B	A	A	B	A	B	A	B	B	A	A	B	A	A	A	A	B	A	B	A	B	B	A	A	A	A	A
BobWhite_c4328_1345		IWB3294	1B	12.147	1A	88.86							A	B	B	B	A	B	A	A	A	B	B	A	A	B	A	B	A	B	B	A	A	B	A	A	A	A	B	A	B	A	B	B	A	A	A	A	A
BobWhite_c3661_88		IWB2853	1B	12.147	1A	65.31							A	B	B	B	A	B	A	A	A	B	B	A	A	B	A	B	A	B	B	A	A	B	A	A	A	A	B	A	B	A	B	B	A	A	A	A	A
Tdurum_contig10150_64		IWB66301	1B	12.147	1B	164.04							A	B	B	B	A	B	A	A	A	B	B	A	A	B	A	B	A	B	B	A	A	B	A	A	A	A	B	A	B	A	B	B	A	A	A	A	A
GENE-1294_120		IWB32365	1B	12.147	2B	416.71							A	B	B	B	A	B	A	A	A	B	B	A	A	B	A	B	A	B	B	A	A	B	A	A	A	A	B	A	B	A	B	B	A	A	A	A	A
CAP12_c1632_462		IWB13227	1B	12.281	1B	160.58							A	B	B	B	A	B	A	A	A	B	B	A	A	B	A	B	A	B	B	A	A	B	A	A	A	A	B	A	B	A	B	B	A	A	A	A	A
D_contig22896_682		IWB16115	1B	12.415	1B	160.4							A	B	B	B	A	B	A	A	A	B	B	A	A	B	A	B	A	B	B	A	A	B	A	A	A	A	B	A	B	A	B	B	A	A	A	A	A
Excalibur_c24303_268		IWB24131	1B	12.548	1B	160.39							A	B	B	B	A	B	A	A	A	B	B	A	A	B	A	B	A	B	B	A	A	B	A	A	A	A	B	A	B	A	B	B	A	A	A	A	A
GENE-0815_140		IWB32110	1B	12.682	1B	74.76							A	B	B	B	A	B	A	A	A	B	B	A	A	B	A	B	A	B	B	A	A	B	A	A	A	A	B	A	B	A	B	B	A	A	A	A	A
Jagger_c5878_119		IWB36662	1B	12.816	1B	13.19					1B_part2	0.8	A	B	B	B	A	B	A	A	A	B	B	A	A	B	A	B	A	B	B	A	A	B	A	A	A	A	B	A	B	A	B	B	A	A	A	A	A
JD_c12243_353		IWB36939	1B	12.949	1B	160.39			1A	147.506			A	B	B	B	A	B	A	A	A	B	B	A	A	B	A	B	A	B	B	A	A	B	A	A	A	A	B	A	B	A	B	B	A	A	A	A	A
BS00083340_51		IWB11297	1B	13.083	1A	46.35							A	B	B	B	A	B	A	A	A	B	B	A	A	B	A	B	A	B	B	A	A	B	A	A	A	A	B	A	B	A	B	B	A	A	A	A	A
BS00021748_51		IWB6753	1B	13.217	1B	160.58							A	B	B	B	A	B	A	A	A	B	B	A	A	B	A	B	A	B	B	A	A	B	A	A	A	A	B	A	B	A	B	B	A	A	A	A	A
GENE-3956_91		IWB33690	1B	13.351	1B	160.58							A	B	B	B	A	B	A	A	A	B	B	A	A	B	A	B	A	B	B	A	A	B	A	A	A	A	B	A	B	A	B	B	A	A	A	A	A
IAAV5936		IWB35116	1B	13.484	1B	154.59							A	B	B	B	A	B	A	A	A	B	B	A	A	B	A	B	A	B	B	A	A	B	A	A	A	A	B	A	B	A	B	B	A	A	A	A	A
IAAV739		IWB35334	1B	13.618	1B	55.33							A	B	B	B	A	B	A	A	A	B	B	A	A	B	A	B	A	B	B	A	A	B	A	A	A	A	B	A	B	A	B	B	A	A	A	A	A
IAAV7445		IWB35341	1B	13.752	1B	160.58							A	B	B	B	A	B	A	A	A	B	B	A	A	B	A	B	A	B	B	A	A	B	A	A	A	A	B	A	B	A	B	B	A	A	A	A	A
IAAV7634		IWB35370	1B	13.885	1B	160.58							A	B	B	B	A	B	A	A	A	B	B	A	A	B	A	B	A	B	B	A	A	B	A	A	A	A	B	A	B	A	B	B	A	A	A	A	A
IAAV7915	TG39691B	IWB35406	1B	14.019	1B	170.93	1B	8.6	1B	60.2128			A	B	B	B	A	B	A	A	A	B	B	A	A	B	A	B	A	B	B	A	A	B	A	A	A	A	B	A	B	A	B	B	A	A	A	A	A
IAAV8621		IWB35504	1B	14.153	1B	160.39							A	B	B	B	A	B	A	A	A	B	B	A	A	B	A	B	A	B	B	A	A	B	A	A	A	A	B	A	B	A	B	B	A	A	A	A	A
Kukri_c2332_1093	TG06241A	IWB42782	1B	14.286	1B	161.52	1B	4.6					A	B	B	B	A	B	A	A	A	B	B	A	A	B	A	B	A	B	B	A	A	B	A	A	A	A	B	A	B	A	B	B	A	A	A	A	A
Kukri_c37212_1286	TG47781A	IWB44655	1B	14.42	1A	30.17	1B	3.4					A	B	B	B	A	B	A	A	A	B	B	A	A	B	A	B	A	B	B	A	A	B	A	A	A	A	B	A	B	A	B	B	A	A	A	A	A
Kukri_rep_c110443_269		IWB49448	1B	14.554	1B	154.59							A	B	B	B	A	B	A	A	A	B	B	A	A	B	A	B	A	B	B	A	A	B	A	A	A	A	B	A	B	A	B	B	A	A	A	A	A
RAC875_c2209_988		IWB55297	1B	14.687	1B	160.58							A	B	B	B	A	B	A	A	A	B	B	A	A	B	A	B	A	B	B	A	A	B	A	A	A	A	B	A	B	A	B	B	A	A	A	A	A
RAC875_rep_c109901_811		IWB61919	1B	14.821	1B	47.15							A	B	B	B	A	B	A	A	A	B	B	A	A	B	A	B	A	B	B	A	A	B	A	A	A	A	B	A	B	A	B	B	A	A	A	A	A
RFL_Contig5444_1284		IWB65006	1B	14.955	1B	160.39							A	B	B	B	A	B	A	A	A	B	B	A	A	B	A	B	A	B	B	A	A	B	A	A	A	A	B	A	B	A	B	B	A	A	A	A	A
TA003600-0503		IWB65713	1B	15.089	1B	160.39							A	B	B	B	A	B	A	A	A	B	B	A	A	B	A	B	A	B	B	A	A	B	A	A	A	A	B	A	B	A	B	B	A	A	A	A	A
Tdurum_contig68637_256	TG0938	IWB73112	1B	15.222	1B	168.2	1B	8					A	B	B	B	A	B	A	A	A	B	B	A	A	B	A	B	A	B	B	A	A	B	A	A	A	A	B	A	B	A	B	B	A	A	A	A	A
RFL_Contig5090_1510		IWB64888	1B	15.356	1A	105.8					1A	46.4907	A	B	B	B	A	B	A	A	A	B	B	A	A	B	A	B	A	B	B	A	A	B	A	A	A	A	B	A	B	A	B	B	A	A	A	A	A
RAC875_c16352_326		IWB54276	1B	15.523									A	B	B	B	A	B	A	A	A	B	B	A	A	B	A	B	A	B	B	A	A	B	A	A	A	A	B	A	B	A	B	B	A	A	A	A	A
GENE-0411_350		IWB31864	1B	15.719	1B	160.58							A	B	B	B	A	B	A	A	A	B	B	A	A	B	A	B	A	B	B	A	A	B	A	A	A	A	B	A	B	A	B	B	A	A	A	A	A
RFL_Contig5090_1154		IWB64887	1B	15.93	1B	155.6							A	B	B	B	A	B	A	A	A	B	B	A	A	B	A	B	A	B	B	A	A	B	A	A	A	A	B	A	B	A	B	B	A	A	A	A	A
Kukri_c15746_189		IWB41449	1B	16.154	1B	160.39							A	B	B	B	A	B	A	A	A	U	B	A	A	B	A	B	A	B	B	A	A	B	A	A	A	A	B	A	B	A	B	B	A	A	A	A	A
Excalibur_c1263_901		IWB22125	1B	16.377	1B	154.59							A	B	B	B	A	B	A	A	A	B	B	A	A	B	A	B	A	B	B	A	A	B	A	A	A	A	B	A	B	A	B	B	A	A	A	A	A
BS00023177_51		IWB7461	1B	16.588	1A	39.32							A	B	B	B	A	B	A	A	A	B	B	A	A	B	A	B	A	B	B	A	A	B	A	A	A	A	B	A	B	A	B	B	A	A	A	A	A
BS00087106_51		IWB11480	1B	16.989	1B	160.39							A	B	B	B	A	B	A	A	A	B	B	A	A	B	A	B	A	B	B	A	A	B	A	A	A	A	B	A	B	A	B	B	A	A	A	A	A
BS00110455_51		IWB12542	1B	17.257	1B	160.58							A	B	B	B	A	B	A	A	A	B	B	A	A	B	A	B	A	B	B	A	A	B	A	A	A	A	B	A	B	A	B	B	A	A	A	A	A
RAC875_c29906_275		IWB56393	1B	17.36	1B	99.39			1B	60.2128			A	B	B	B	A	B	A	A	A	B	B	A	A	B	A	B	A	B	B	A	A	B	A	A	A	A	B	A	B	A	B	B	A	A	A	A	A
BS00068096_51		IWB10230	1B	18.044	1B	160.39							A	B	B	B	A	B	A	A	A	B	B	A	A	B	A	B	A	B	B	A	A	B	A	A	A	A	B	A	B	A	B	B	A	A	A	A	A
Tdurum_contig15345_1044		IWB68396	1B	18.044									A	B	B	B	A	B	A	A	A	B	B	A	A	B	A	B	A	B	B	A	A	B	A	A	A	A	B	A	B	A	B	B	A	A	A	A	A
Kukri_rep_c112401_78		IWB49554	1B	18.58	1B	154.59							A	B	B	B	A	B	A	A	A	B	B	A	A	B	A	B	A	B	B	A	A	B	A	A	A	A	B	A	B	A	B	B	A	A	A	A	A
IAAV3590		IWB34743	1B	18.58									A	B	B	B	A	B	A	A	A	B	B	A	A	B	A	B	A	B	B	A	A	B	A	A	A	A	B	A	B	A	B	B	A	A	A	A	A
CAP7_s13262_197		IWB14488	1B	19.125	1B	3.2							A	B	U	B	A	B	A	A	A	U	B	A	A	B	A	B	A	B	B	A	A	B	A	A	A	A	B	A	B	A	B	B	A	A	A	A	A
IAAV1905		IWB34470	1B	19.832	1B	160.39							A	B	B	U	A	B	A	A	A	B	B	A	A	B	A	B	A	B	B	A	A	B	A	A	A	A	B	A	B	A	B	B	A	A	A	A	A
BS00098730_51		IWB12044	1B	20.537	1B	160.39							A	B	B	B	A	B	A	A	A	B	B	A	A	B	A	B	A	B	B	A	A	B	A	A	A	A	B	A	B	A	B	B	A	A	A	A	A
BS00094017_51		IWB11851	1B	20.537	1B	172.49							A	B	B	B	A	B	A	A	A	B	B	A	A	B	A	B	A	B	B	A	A	B	A	A	A	A	B	A	B	A	B	B	A	A	A	A	A
IAAV3683		IWB34755	1B	20.537	1B	74.76							A	B	B	B	A	B	A	A	A	B	B	A	A	B	A	B	A	B	B	A	A	B	A	A	A	A	B	A	B	A	B	B	A	A	A	A	A
BS00071161_51	TG14881B	IWB10529	1B	21.072	1B	14.19	1B	3.4					A	B	B	B	A	B	A	A	A	B	B	A	A	B	A	B	A	B	B	A	A	B	A	A	A	A	B	A	B	A	B	B	A	A	A	A	A
Excalibur_rep_c110294_82		IWB30468	1B	21.34	1B	38.54							A	B	B	B	A	B	A	A	A	B	B	A	A	B	A	B	A	B	B	A	A	B	A	A	A	A	B	A	B	A	B	B	A	A	A	A	A
Excalibur_c23734_234		IWB24029	1B	21.608	1B	160.28							A	B	B	B	A	B	A	A	A	B	B	A	A	B	A	B	A	B	B	A	A	B	A	A	A	A	B	A	B	A	B	B	A	A	A	A	A
D_contig18874_367		IWB15943	1B	21.798	1B	160.39							A	B	B	B	A	B	A	A	A	B	B	A	A	B	A	B	A	B	B	A	A	B	A	A	A	A	B	A	B	A	B	B	A	A	A	A	A
D_contig94337_140		IWB17273	1B	22.892	1B	154.59			1B	46.4495			A	B	B	B	A	B	A	A	A	B	B	A	A	B	A	B	A	B	B	A	A	B	A	A	A	A	B	A	B	A	B	B	A	A	A	A	A
BS00065737_51		IWB9627	1B	23.304	1B	87.67							A	B	B	B	A	B	A	A	A	B	B	A	A	B	A	B	A	B	B	A	A	B	A	A	A	A	B	A	B	A	B	B	A	A	A	A	A
wsnp_Ex_c43586_49862663		IWA3875	1B	23.841	1A	124.3					1A	88.485	A	B	B	B	A	B	A	A	A	B	B	A	A	B	A	B	A	B	B	A	A	B	A	A	A	A	B	A	B	A	B	B	A	A	A	A	A
Excalibur_c6726_357		IWB28467	1B	24.628	1B	83.41							A	B	B	B	A	B	A	A	A	B	B	A	A	B	A	B	A	B	B	A	A	B	A	A	A	A	B	A	B	A	B	B	A	A	A	A	A
GENE-0158_358		IWB31713	1B	25.478	1B	160.34							A	B	B	B	A	B	A	A	A	B	B	A	A	B	A	B	A	B	B	A	A	B	A	A	A	A	B	A	B	A	B	B	A	A	A	A	A
wsnp_Ex_rep_c67665_66326492		IWA5435	1B	25.919	1A	124.3					1A	88.485	A	B	B	B	A	B	A	A	A	B	B	A	A	B	A	B	A	B	B	A	A	B	A	A	A	A	B	A	B	A	B	B	A	A	A	A	A
BS00082302_51		IWB11250	1B	27.004									A	B	B	B	A	B	A	A	A	B	B	A	A	B	A	B	A	B	B	A	A	B	A	A	A	A	B	A	B	A	B	B	A	A	A	A	A
BS00064406_51		IWB9272	1B	27.51	1B	159.06							A	B	B	B	A	B	A	A	A	B	B	A	A	B	A	B	A	B	B	A	A	B	A	A	A	A	B	A	B	A	B	B	A	A	A	A	A
Excalibur_c101903_287		IWB21571	1B	28.102	1B	82							A	B	B	B	A	B	A	A	A	B	B	A	A	B	A	B	A	B	B	A	A	B	A	A	A	A	B	A	B	A	B	B	A	A	A	A	A
tplb0043h23_1346		IWB74770	1B	28.412	1A	65.31			1A	193.98			A	B	B	B	A	B	A	A	A	B	B	A	A	B	U	B	A	B	B	A	A	B	A	A	A	A	B	A	B	A	B	B	A	A	A	A	A
wsnp_Ex_rep_c70593_69508988	TG45851A	IWA5702	1B	28.412	1A	124.3	1B	5.7			1A	88.1456	A	B	B	B	A	B	A	A	A	B	B	A	A	B	A	B	A	B	B	A	A	B	A	A	A	A	B	A	B	A	B	B	A	A	A	A	A
Tdurum_contig9811_172		IWB74029	1B	28.412	1B	84.27							A	B	B	B	A	B	A	A	A	B	B	A	A	B	A	B	A	B	B	A	A	B	A	A	A	A	B	A	B	A	B	B	A	A	A	A	A
Kukri_c29582_126	TG40521B	IWB43742	1B	28.412	1B	159.06	1B	4.6			1B	40.7	A	B	B	B	A	B	A	A	A	B	B	A	A	B	A	B	A	B	B	A	A	B	A	A	A	A	B	A	B	A	B	B	A	A	A	A	A
IAAV3583		IWB34740	1B	28.412	1B	160.39							A	B	B	B	A	B	A	A	A	B	B	A	A	B	A	B	A	B	B	A	A	B	A	A	A	A	B	A	B	A	B	B	A	A	A	A	A
GENE-2766_500		IWB33051	1B	28.412	1B	160.39							A	B	B	B	A	B	A	A	A	B	B	A	A	B	A	B	A	B	B	A	A	B	A	A	A	A	B	A	B	A	B	B	A	A	A	A	A
GENE-0528_131		IWB31946	1B	28.412	1B	187.17							A	B	B	B	A	B	A	A	A	B	B	A	A	B	A	B	A	B	B	A	A	B	A	A	A	A	B	A	B	A	B	B	A	A	A	A	A
GENE-0400_330		IWB31856	1B	28.412	1B	160.58							A	B	B	B	A	B	A	A	A	B	B	A	A	B	A	B	A	B	B	A	A	B	A	A	A	A	B	A	B	A	B	B	A	A	A	A	A
GENE-0400_297		IWB31855	1B	28.412	1B	160.58							A	B	B	B	A	B	A	A	A	B	B	A	A	B	A	B	A	B	B	A	A	B	A	A	A	A	B	A	B	A	B	B	A	A	A	A	A
BS00081167_51		IWB11172	1B	28.412	1B	159.06							A	B	B	B	A	B	A	A	A	B	B	A	A	B	A	B	A	B	B	A	A	B	A	A	A	A	B	A	B	A	B	B	A	A	A	A	A
BS00031948_51		IWB7862	1B	28.412	1B	143.23					1B	38.3	A	B	B	B	A	B	A	A	A	B	B	A	A	B	A	B	A	B	B	A	A	B	A	A	A	A	B	A	B	A	B	B	A	A	A	A	A
BS00022593_51		IWB7168	1B	28.412	1B	160.39							A	B	B	B	A	B	A	A	A	B	B	A	A	B	A	B	A	B	B	A	A	B	A	A	A	A	B	A	B	A	B	B	A	A	A	A	A
BS00019225_51		IWB6664	1B	28.412	1B	154.59							A	B	B	B	A	B	A	A	A	B	B	A	A	B	A	B	A	B	B	A	A	B	A	A	A	A	B	A	B	A	B	B	A	A	A	A	A
BobWhite_c27474_124		IWB2105	1B	28.412	1A	56.98							A	B	B	B	A	B	A	A	A	B	B	A	A	B	A	B	A	B	B	A	A	B	A	A	A	A	B	A	B	A	B	B	A	A	A	A	A
BS00009715_51		IWB6102	1B	28.412	1B	179.75							A	B	B	B	A	B	A	A	A	B	B	A	A	B	A	B	A	B	B	A	A	B	A	A	A	A	B	A	B	A	B	B	A	A	A	A	A
GENE-3070_276		IWB33205	1B	28.412									A	B	B	B	A	B	A	A	A	B	B	A	A	B	A	B	A	B	B	A	A	B	A	A	A	A	B	A	B	A	B	B	A	A	A	A	A
Excalibur_c48152_818		IWB26930	1B	28.412	1A	48.45			1A	193.98			A	B	B	B	A	B	A	A	A	B	B	A	A	B	A	B	A	B	B	A	A	B	A	A	A	A	B	A	B	A	B	B	A	A	A	A	A
Excalibur_c104812_285		IWB21655	1B	28.412	4A	175.19							A	B	B	B	A	B	A	A	A	B	B	A	A	B	A	B	A	B	B	A	A	B	A	A	A	A	B	A	B	A	B	B	A	A	A	A	A
BobWhite_c4246_292		IWB3239	1B	28.412	1B	160.39							A	B	B	B	A	B	A	A	A	B	B	A	A	B	A	B	A	B	B	A	A	B	A	A	A	A	B	A	B	A	B	B	A	A	A	A	A
Ku_c66951_958		IWB39791	1B	28.412	1B	159.12							A	B	B	B	A	B	A	A	A	B	B	A	A	B	A	B	A	B	B	A	A	B	A	A	A	A	B	A	B	A	B	B	A	A	A	A	A
wsnp_Ku_c4911_8795151		IWA7117	1B	28.412	1B	89.39							A	B	B	B	A	B	A	A	A	B	B	A	A	B	A	B	A	B	B	A	A	B	A	A	A	A	B	A	B	A	B	B	A	A	A	A	A
wsnp_Ku_c16938_25916260	TG23471B	IWA6610	1B	28.412	1B	74.76	1B	8.6					A	B	B	B	A	B	A	A	A	B	B	A	A	B	A	B	A	B	B	A	A	B	A	A	A	A	B	A	B	A	B	B	A	A	A	A	A
wsnp_Ex_c14273_22230844		IWA1883	1B	28.412	1B	78.14							A	B	B	B	A	B	A	A	A	B	B	A	A	B	A	B	A	B	B	A	A	B	A	A	A	A	B	A	B	A	B	B	A	A	A	A	A
wsnp_BF473056D_Ta_2_1		IWA466	1B	28.412	1B	84.38							A	B	B	B	A	B	A	A	A	B	B	A	A	B	A	B	A	B	B	A	A	B	A	A	A	A	B	A	B	A	B	B	A	A	A	A	A
wsnp_BE490041A_Ta_2_1		IWA217	1B	28.412	1A	104.38					1A	48.3571	A	B	B	B	A	B	A	A	A	B	B	A	A	B	A	B	A	B	B	A	A	B	A	A	A	A	B	A	B	A	B	B	A	A	A	A	A
tplb0026b15_350		IWB74267	1B	28.412	1B	160.39							A	B	B	B	A	B	A	A	A	B	B	A	A	B	A	B	A	B	B	A	A	B	A	A	A	A	B	A	B	A	B	B	A	A	A	A	A
Tdurum_contig75938_1546	TG31321B	IWB73332	1B	28.412	1B	88.88	1B	8.6	1B	60.2128			A	B	B	B	A	B	A	A	A	B	B	A	A	B	A	B	A	B	B	A	A	B	A	A	A	A	B	A	B	A	B	B	A	A	A	A	A
Tdurum_contig70094_228		IWB73163	1B	28.412	1B	74.76							A	B	B	B	A	B	A	A	A	B	B	A	A	B	A	B	A	B	B	A	A	B	A	A	A	A	B	A	B	A	B	B	A	A	A	A	A
Tdurum_contig61410_467		IWB72786	1B	28.412	1B	84.27							A	B	B	B	A	B	A	A	A	B	B	A	A	B	A	B	A	B	B	A	A	B	A	A	A	A	B	A	B	A	B	B	A	A	A	A	A
Tdurum_contig50555_944		IWB72085	1B	28.412	1B	63.87							A	B	B	B	A	B	A	A	A	B	B	A	A	B	A	B	A	B	B	A	A	B	A	A	A	A	B	A	B	A	B	B	A	A	A	A	A
Tdurum_contig47083_278	TG31011B	IWB71754	1B	28.412	1B	49.29	1B	1.7					A	B	B	B	A	B	A	A	A	B	B	A	A	B	A	B	A	B	B	A	A	B	A	A	A	A	B	A	B	A	B	B	A	A	A	A	A
Tdurum_contig42092_1244		IWB70812	1B	28.412	1B	65.5							A	B	B	B	A	B	A	A	A	B	B	A	A	B	A	B	A	B	B	A	A	B	A	A	A	A	B	A	B	A	B	B	A	A	A	A	A
Tdurum_contig42092_1047	TG13034D	IWB70811	1B	28.412	1B	160.39	1B	4.6					A	B	B	B	A	B	A	A	A	B	B	A	A	B	A	B	A	B	B	A	A	B	A	A	A	A	B	A	B	A	B	B	A	A	A	A	A
Tdurum_contig34019_260		IWB70475	1B	28.412	1B	74.76			1A	146.844			A	B	B	B	A	B	A	A	A	B	B	A	A	B	A	B	A	B	B	A	A	B	A	A	A	A	B	A	B	A	B	B	A	A	A	A	A
Tdurum_contig31387_156		IWB70238	1B	28.412	1B	154.59							A	B	B	B	A	B	A	A	A	B	B	A	A	B	A	B	A	B	B	A	A	B	A	A	A	A	B	A	B	A	B	B	A	A	A	A	A
Tdurum_contig29169_289		IWB69725	1B	28.412	1B	159.06							A	B	B	B	A	B	A	A	A	B	B	A	A	B	A	B	A	B	B	A	A	B	A	A	A	A	B	A	B	A	B	B	A	A	A	A	A
Tdurum_contig25732_112		IWB69171	1B	28.412	1B	159.06							A	B	B	B	A	B	A	A	A	B	B	A	A	B	A	B	A	B	B	A	A	B	A	A	A	A	B	A	B	A	B	B	A	A	A	A	A
Tdurum_contig21489_536		IWB68933	1B	28.412	1B	74.76							A	B	B	B	A	B	A	A	A	B	B	A	A	B	A	B	A	B	B	A	A	B	A	A	A	A	B	A	B	A	B	B	A	A	A	A	A
Tdurum_contig19376_810		IWB68801	1B	28.412	1B	99.39							A	B	B	B	A	B	A	A	A	B	B	A	A	B	A	B	A	B	B	A	A	B	A	A	A	A	B	A	B	A	B	B	A	A	A	A	A
Tdurum_contig14847_144	TG35281A	IWB68307	1B	28.412	1B	197.88	1B	6.3	1B	38.2786			A	B	B	B	A	B	A	A	A	B	B	A	A	B	A	B	A	B	B	A	A	B	A	A	A	A	B	A	B	A	B	B	A	A	A	A	A
Tdurum_contig14418_1242		IWB68205	1B	28.412	1B	154.59							A	B	B	B	A	B	A	A	A	B	B	A	A	B	A	B	A	B	B	A	A	B	A	A	A	A	B	A	B	A	B	B	A	A	A	A	A
Tdurum_contig13937_1782		IWB68104	1B	28.412	1B	154.59							A	B	B	B	A	B	A	A	A	B	B	A	A	B	A	B	A	B	B	A	A	B	A	A	A	A	B	A	B	A	B	B	A	A	A	A	A
Tdurum_contig13709_317		IWB68067	1B	28.412	1B	159.06							A	B	B	B	A	B	A	A	A	B	B	A	A	B	A	B	A	B	B	A	A	B	A	A	A	A	B	A	B	A	B	B	A	A	A	A	A
Tdurum_contig12812_182		IWB67741	1B	28.412	1B	101.26							A	B	B	B	A	B	A	A	A	B	B	A	A	B	A	B	A	B	B	A	A	B	A	A	A	A	B	A	B	A	B	B	A	A	A	A	A
Tdurum_contig100344_184		IWB66183	1B	28.412	1B	159.06							A	B	B	B	A	B	A	A	A	B	B	A	A	B	A	B	A	B	B	A	A	B	A	A	A	A	B	A	B	A	B	B	A	A	A	A	A
Tdurum_contig100344_160	TG35251B	IWB66182	1B	28.412	1B	159.06	1B	3.4					A	B	B	B	A	B	A	A	A	B	B	A	A	B	A	B	A	B	B	A	A	B	A	A	A	A	B	A	B	A	B	B	A	A	A	A	A
TA006347-0547		IWB66085	1B	28.412	1B	154.59							A	B	B	B	A	B	A	A	A	B	B	A	A	B	A	B	A	B	B	A	A	B	A	A	A	A	B	A	B	A	B	B	A	A	A	A	A
TA005710-0827		IWB66008	1B	28.412	1B	154.59							A	B	B	B	A	B	A	A	A	B	B	A	A	B	A	B	A	B	B	A	A	B	A	A	A	A	B	A	B	A	B	B	A	A	A	A	A
TA004123-0331	TG3522	IWB65786	1B	28.412	1B	154.59	1B	1.7					A	B	B	B	A	B	A	A	A	B	B	A	A	B	A	B	A	B	B	A	A	B	A	A	A	A	B	A	B	A	B	B	A	A	A	A	A
TA003235-0794		IWB65665	1B	28.412	1B	65.5							A	B	B	B	A	B	A	A	A	B	B	A	A	B	A	B	A	B	B	A	A	B	A	A	A	A	B	A	B	A	B	B	A	A	A	A	A
RFL_Contig5637_1008	TG20201A	IWB65069	1B	28.412	1B	197.88	1B	8	1B	38.2786			A	B	B	B	A	B	A	A	A	B	B	A	A	B	A	B	A	B	B	A	A	B	A	A	A	A	B	A	B	A	B	B	A	A	A	A	A
RFL_Contig1736_1393		IWB63716	1B	28.412	1B	160.39							A	B	B	B	A	B	A	A	A	B	B	A	A	B	A	B	A	B	B	A	A	B	A	A	A	A	B	A	B	A	B	B	A	A	A	A	A
RAC875_s115222_177		IWB63445	1B	28.412	1B	154.59							A	B	B	B	A	B	A	A	A	B	B	A	A	B	A	B	A	B	B	A	A	B	A	A	A	A	B	A	B	A	B	B	A	A	A	A	A
RAC875_rep_c69176_194		IWB62541	1B	28.412	1B	159.06							A	B	B	B	A	B	A	A	A	B	B	A	A	B	A	B	A	B	B	A	A	B	A	A	A	A	B	A	B	A	B	B	A	A	A	A	A
RAC875_c9457_788		IWB61103	1B	28.412	1B	74.76							A	B	B	B	A	B	A	A	A	B	B	A	A	B	A	B	A	B	B	A	A	B	A	A	A	A	B	A	B	A	B	B	A	A	A	A	A
RAC875_c9457_457		IWB61101	1B	28.412	1B	38.54							A	B	B	B	A	B	A	A	A	B	B	A	A	B	A	B	A	B	B	A	A	B	A	A	A	A	B	A	B	A	B	B	A	A	A	A	A
RAC875_c90431_275	TG1288	IWB61004	1B	28.412	1B	127.3	1B	2.9			1B	38.3	A	B	B	B	A	B	A	A	A	B	B	A	A	B	A	B	A	B	B	A	A	B	A	A	A	A	B	A	B	A	B	B	A	A	A	A	A
RAC875_c82649_146		IWB60709	1B	28.412	1B	74.76							A	B	B	B	A	B	A	A	A	B	B	A	A	B	A	B	A	B	B	A	A	B	A	A	A	A	B	A	B	A	B	B	A	A	A	A	A
RAC875_c79514_853		IWB60567	1B	28.412	1B	159.06							A	B	B	B	A	B	A	A	A	B	B	A	A	B	A	B	A	B	B	A	A	B	A	A	A	A	B	A	B	A	B	B	A	A	A	A	A
RAC875_c79370_378	TG29831B	IWB60559	1B	28.412	1B	158.9	1B	2.9					A	B	B	B	A	B	A	A	A	B	B	A	A	B	A	B	A	B	B	A	A	B	A	A	A	A	B	A	B	A	B	B	A	A	A	A	A
RAC875_c63067_283	TG19691B	IWB59742	1B	28.412	1B	160.39	1B	4.6					A	B	B	B	A	B	A	A	A	B	B	A	A	B	A	B	A	B	B	A	A	B	A	A	A	A	B	A	B	A	B	B	A	A	A	A	A
RAC875_c50407_177		IWB58644	1B	28.412	1B	159.06							A	B	B	B	A	B	A	A	A	B	B	A	A	B	A	B	A	B	B	A	A	B	A	A	A	A	B	A	B	A	B	B	A	A	A	A	A
RAC875_c47137_112	TG29581B	IWB58317	1B	28.412	1B	157.1	1B	3.4			1B	38.3	A	B	B	B	A	B	A	A	A	B	B	A	A	B	A	B	A	B	B	A	A	B	A	A	A	A	B	A	B	A	B	B	A	A	A	A	A
RAC875_c14902_256		IWB54028	1B	28.412	1B	159.12							A	B	B	B	A	B	A	A	A	B	B	A	A	B	A	B	A	B	B	A	A	B	A	A	A	A	B	A	B	A	B	B	A	A	A	A	A
RAC875_c140_338		IWB53832	1B	28.412	1B	74.76							A	B	B	B	A	B	A	A	A	B	B	A	A	B	A	B	A	B	B	A	A	B	A	A	A	A	B	A	B	A	B	B	A	A	A	A	A
RAC875_c13585_778		IWB53745	1B	28.412	1B	103.13							A	B	B	B	A	B	A	A	A	B	B	A	A	B	A	B	A	B	B	A	A	B	A	A	A	A	B	A	B	A	B	B	A	A	A	A	A
RAC875_c11123_186		IWB53256	1B	28.412	1B	154.59							A	B	B	B	A	B	A	A	A	B	B	A	A	B	A	B	A	B	B	A	A	B	A	A	A	A	B	A	B	A	B	B	A	A	A	A	A
RAC875_c10659_570	TG29041A	IWB53143	1B	28.412	1B	159.12	1B	2.9					A	B	B	B	A	B	A	A	A	B	B	A	A	B	A	B	A	B	B	A	A	B	A	A	A	A	B	A	B	A	B	B	A	A	A	A	A
Kukri_rep_c68217_1456		IWB49765	1B	28.412	1B	74.76							A	B	B	B	A	B	A	A	A	B	B	A	A	B	A	B	A	B	B	A	A	B	A	A	A	A	B	A	B	A	B	B	A	A	A	A	A
Kukri_rep_c102887_300		IWB48815	1B	28.412	1B	154.59							A	B	B	B	A	B	A	A	A	B	B	A	A	B	A	B	A	B	B	A	A	B	A	A	A	A	B	A	B	A	B	B	A	A	A	A	A
Kukri_c7936_630		IWB47803	1B	28.412	1B	160.39							A	B	B	B	A	B	A	A	A	B	B	A	A	B	A	B	A	B	B	A	A	B	A	A	A	A	B	A	B	A	B	B	A	A	A	A	A
Kukri_c79135_136		IWB47794	1B	28.412	1B	65.34							A	B	B	B	A	B	A	A	A	B	B	A	A	B	A	B	A	B	B	A	A	B	A	A	A	A	B	A	B	A	B	B	A	A	A	A	A
Kukri_c7647_1122		IWB47684	1B	28.412	1B	159.12							A	B	B	B	A	B	A	A	A	B	B	A	A	B	A	B	A	B	B	A	A	B	A	A	A	A	B	A	B	A	B	B	A	A	A	A	A
Kukri_c6300_347		IWB47034	1B	28.412	1B	160.39							A	B	B	B	A	B	A	A	A	B	B	A	A	B	A	B	A	B	B	A	A	B	A	A	A	A	B	A	B	A	B	B	A	A	A	A	A
Kukri_c53962_102		IWB46387	1B	28.412	1B	154.59							A	B	B	B	A	B	A	A	A	B	B	A	A	B	A	B	A	B	B	A	A	B	A	A	A	A	B	A	B	A	B	B	A	A	A	A	A
Kukri_c5299_462		IWB46306	1B	28.412	1B	159.06							A	B	B	B	A	B	A	A	A	B	B	A	A	B	A	B	A	B	B	A	A	B	A	A	A	A	B	A	B	A	B	B	A	A	A	A	A
Kukri_c51925_654	TG2857	IWB46204	1B	28.412	1B	154.59	1B	3.4					A	B	B	B	A	B	A	A	A	B	B	A	A	B	A	B	A	B	B	A	A	B	A	A	A	A	B	A	B	A	B	B	A	A	A	A	A
Kukri_c51268_248		IWB46147	1B	28.412	1B	170.93			1B	60.2128			A	B	B	B	A	B	A	A	A	B	B	A	A	B	A	B	A	B	B	A	A	B	A	A	A	A	B	A	B	A	B	B	A	A	A	A	A
Kukri_c44369_131	TG34751B	IWB45437	1B	28.412	1B	13.69	1B	1.7			1B_part2	0.8	A	B	B	B	A	B	A	A	A	B	B	A	A	B	A	B	A	B	B	A	A	B	A	A	A	A	B	A	B	A	B	B	A	A	A	A	A
Kukri_c34902_520		IWB44383	1B	28.412	1B	159.06							A	B	B	B	A	B	A	A	A	B	B	A	A	B	A	B	A	B	B	A	A	B	A	A	A	A	B	A	B	A	B	B	A	A	A	A	A
Kukri_c34793_360	TG34723A	IWB44363	1B	28.412	1B	84.25	1B	4.6					A	B	B	B	A	B	A	A	A	B	B	A	A	B	A	B	A	B	B	A	A	B	A	A	A	A	B	A	B	A	B	B	A	A	A	A	A
Kukri_c34536_259		IWB44340	1B	28.412	1B	74.76							A	B	B	B	A	B	A	A	A	B	B	A	A	B	A	B	A	B	B	A	A	B	A	A	A	A	B	A	B	A	B	B	A	A	A	A	A
Kukri_c34436_560		IWB44328	1B	28.412	1B	154.59							A	B	B	B	A	B	A	A	A	B	B	A	A	B	A	B	A	B	B	A	A	B	A	A	A	A	B	A	B	A	B	B	A	A	A	A	A
Kukri_c3414_114		IWB44280	1B	28.412	1B	74.76							A	B	B	B	A	B	A	A	A	B	B	A	A	B	A	B	A	B	B	A	A	B	A	A	A	A	B	A	B	A	B	B	A	A	A	A	A
Kukri_c33586_75		IWB44216	1B	28.412	1A	129.88							A	B	B	B	A	B	A	A	A	B	B	A	A	B	A	B	A	B	B	A	A	B	A	A	A	A	B	A	B	A	B	B	A	A	A	A	A
Kukri_c29541_416		IWB43737	1B	28.412	1B	154.59							A	B	B	B	A	B	A	A	A	B	B	A	A	B	A	B	A	B	B	A	A	B	A	A	A	A	B	A	B	A	B	B	A	A	A	A	A
Kukri_c26973_189		IWB43365	1B	28.412	1B	159.06							A	B	B	B	A	B	A	A	A	B	B	A	A	B	A	B	A	B	B	A	A	B	A	A	A	A	B	A	B	A	B	B	A	A	A	A	A
Kukri_c25654_382		IWB43158	1B	28.412	1B	74.76							A	B	B	B	A	B	A	A	A	B	B	A	A	B	A	B	A	B	B	A	A	B	A	A	A	A	B	A	B	A	B	B	A	A	A	A	A
Kukri_c23662_414		IWB42844	1B	28.412	1B	154.59							A	B	B	B	A	B	A	A	A	B	B	A	A	B	A	B	A	B	B	A	A	B	A	A	A	A	B	A	B	A	B	B	A	A	A	A	A
Kukri_c20401_674		IWB42309	1B	28.412	1B	154.59							A	B	B	B	A	B	A	A	A	B	B	A	A	B	A	B	A	B	B	A	A	B	A	A	A	A	B	A	B	A	B	B	A	A	A	A	A
Kukri_c20180_112		IWB42272	1B	28.412	1B	159.06							A	B	B	B	A	B	A	A	A	B	B	A	A	B	A	B	A	B	B	A	A	B	A	A	A	A	B	A	B	A	B	B	A	A	A	A	A
Kukri_c18305_873		IWB41939	1B	28.412	1B	159.06							A	B	B	B	A	B	A	A	A	B	B	A	A	B	A	B	A	B	B	A	A	B	A	A	A	A	B	A	B	A	B	B	A	A	A	A	A
Kukri_c18081_988		IWB41887	1B	28.412	1B	154.59							A	B	B	B	A	B	A	A	A	B	B	A	A	B	A	B	A	B	B	A	A	B	A	A	A	A	B	A	B	A	B	B	A	A	A	A	A
Kukri_c17055_189		IWB41702	1B	28.412	1B	154.59							A	B	B	B	A	B	A	A	A	B	B	A	A	B	A	B	A	B	B	A	A	B	A	A	A	A	B	A	B	A	B	B	A	A	A	A	A
Kukri_c15901_1064		IWB41474	1B	28.412	1B	154.59							A	B	B	B	A	B	A	A	A	B	B	A	A	B	A	B	A	B	B	A	A	B	A	A	A	A	B	A	B	A	B	B	A	A	A	A	A
Kukri_c14149_462		IWB41164	1B	28.412	1B	170.93							A	B	B	B	A	B	A	A	A	B	B	A	A	B	A	B	A	B	B	A	A	B	A	A	A	A	B	A	B	A	B	B	A	A	A	A	A
Kukri_c1312_666		IWB40971	1B	28.412	1B	54.32							A	B	B	B	A	B	A	A	A	B	B	A	A	B	A	B	A	B	B	A	A	B	A	A	A	A	B	A	B	A	B	B	A	A	A	A	A
Kukri_c11707_160		IWB40665	1B	28.412	1B	154.59							A	B	B	B	A	B	A	A	A	B	B	A	A	B	A	B	A	B	B	A	A	B	A	A	A	A	B	A	B	A	B	B	A	A	A	A	A
Ku_c1312_1194	TG1733	IWB38368	1B	28.412	1B	170.93	1B	7.4	1B	38.2786			A	B	B	B	A	B	A	A	A	B	B	A	A	B	A	B	A	B	B	A	A	B	A	A	A	A	B	A	B	A	B	B	A	A	A	A	A
IACX6858		IWB36177	1B	28.412	1B	74.76							A	B	B	B	A	B	A	A	A	B	B	A	A	B	A	B	A	B	B	A	A	B	A	A	A	A	B	A	B	A	B	B	A	A	A	A	A
IACX3431		IWB35925	1B	28.412	1B	159.06							A	B	B	B	A	B	A	A	A	B	B	A	A	B	A	B	A	B	B	A	A	B	A	A	A	A	B	A	B	A	B	B	A	A	A	A	A
IACX20344		IWB35828	1B	28.412	1B	159.06							A	B	B	B	A	B	A	A	A	B	B	A	A	B	A	B	A	B	B	A	A	B	A	A	A	A	B	A	B	A	B	B	A	A	A	A	A
IACX16878		IWB35775	1B	28.412	1B	154.59							A	B	B	B	A	B	A	A	A	B	B	A	A	B	A	B	A	B	B	A	A	B	A	A	A	A	B	A	B	A	B	B	A	A	A	A	A
IAAV8714		IWB35527	1B	28.412	1B	74.76							A	B	B	B	A	B	A	A	A	B	B	A	A	B	A	B	A	B	B	A	A	B	A	A	A	A	B	A	B	A	B	B	A	A	A	A	A
IAAV8117		IWB35431	1B	28.412	1B	154.59							A	B	B	B	A	B	A	A	A	B	B	A	A	B	A	B	A	B	B	A	A	B	A	A	A	A	B	A	B	A	B	B	A	A	A	A	A
IAAV7845		IWB35394	1B	28.412	1B	160.39							A	B	B	B	A	B	A	A	A	B	B	A	A	B	A	B	A	B	B	A	A	B	A	A	A	A	B	A	B	A	B	B	A	A	A	A	A
IAAV6464	TG27511B	IWB35204	1B	28.412	1B	159.06	1B	2.9					A	B	B	B	A	B	A	A	A	B	B	A	A	B	A	B	A	B	B	A	A	B	A	A	A	A	B	A	B	A	B	B	A	A	A	A	A
IAAV5957		IWB35120	1B	28.412	1B	159.06							A	B	B	B	A	B	A	A	A	B	B	A	A	B	A	B	A	B	B	A	A	B	A	A	A	A	B	A	B	A	B	B	A	A	A	A	A
IAAV4985		IWB34959	1B	28.412	1B	172.49							A	B	B	B	A	B	A	A	A	B	B	A	A	B	A	B	A	B	B	A	A	B	A	A	A	A	B	A	B	A	B	B	A	A	A	A	A
IAAV4559		IWB34887	1B	28.412	1B	74.76							A	B	B	B	A	B	A	A	A	B	B	A	A	B	A	B	A	B	B	A	A	B	A	A	A	A	B	A	B	A	B	B	A	A	A	A	A
IAAV3431		IWB34716	1B	28.412	1B	74.76							A	B	B	B	A	B	A	A	A	B	B	A	A	B	A	B	A	B	B	A	A	B	A	A	A	A	B	A	B	A	B	B	A	A	A	A	A
IAAV2773		IWB34610	1B	28.412	1B	159.06							A	B	B	B	A	B	A	A	A	B	B	A	A	B	A	B	A	B	B	A	A	B	A	A	A	A	B	A	B	A	B	B	A	A	A	A	A
IAAV268		IWB34595	1B	28.412	1B	74.76							A	B	B	B	A	B	A	A	A	B	B	A	A	B	A	B	A	B	B	A	A	B	A	A	A	A	B	A	B	A	B	B	A	A	A	A	A
IAAV2324	TG27321B	IWB34533	1B	28.412	1B	159.06	1B	2.9					A	B	B	B	A	B	A	A	A	B	B	A	A	B	A	B	A	B	B	A	A	B	A	A	A	A	B	A	B	A	B	B	A	A	A	A	A
GENE-4668_244	TG16747A	IWB34093	1B	28.412	1B	83.41	1B	1.7					A	B	B	B	A	B	A	A	A	B	B	A	A	B	A	B	A	B	B	A	A	B	A	A	A	A	B	A	B	A	B	B	A	A	A	A	A
GENE-3070_114		IWB33204	1B	28.412	1B	87.52							A	B	B	B	A	B	A	A	A	B	B	A	A	B	A	B	A	B	B	A	A	B	A	A	A	A	B	A	B	A	B	B	A	A	A	A	A
GENE-2162_720		IWB32835	1B	28.412	1B	159.02					1B	36.7	A	B	B	B	A	B	A	A	A	B	B	A	A	B	A	B	A	B	B	A	A	B	A	A	A	A	B	A	B	A	B	B	A	A	A	A	A
GENE-1756_115	TG34524A	IWB32639	1B	28.412	1B	77.05	1B	1.7					A	B	B	B	A	B	A	A	A	B	B	A	A	B	A	B	A	B	B	A	A	B	A	A	A	A	B	A	B	A	B	B	A	A	A	A	A
GENE-1276_68		IWB32353	1B	28.412	1B	160.34							A	B	B	B	A	B	A	A	A	B	B	A	A	B	A	B	A	B	B	A	A	B	A	A	A	A	B	A	B	A	B	B	A	A	A	A	A
GENE-0496_408		IWB31926	1B	28.412	1B	154.59							A	B	B	B	A	B	A	A	A	B	B	A	A	B	A	B	A	B	B	A	A	B	A	A	A	A	B	A	B	A	B	B	A	A	A	A	A
GENE-0466_416		IWB31900	1B	28.412	1B	159.06							A	B	B	B	A	B	A	A	A	B	B	A	A	B	A	B	A	B	B	A	A	B	A	A	A	A	B	A	B	A	B	B	A	A	A	A	A
GENE-0456_190		IWB31896	1B	28.412	1B	154.59							A	B	B	B	A	B	A	A	A	B	B	A	A	B	A	B	A	B	B	A	A	B	A	A	A	A	B	A	B	A	B	B	A	A	A	A	A
GENE-0427_115		IWB31874	1B	28.412	1B	87.67							A	B	B	B	A	B	A	A	A	B	B	A	A	B	A	B	A	B	B	A	A	B	A	A	A	A	B	A	B	A	B	B	A	A	A	A	A
GENE-0303_730		IWB31797	1B	28.412									A	B	B	B	A	B	A	A	A	B	B	A	A	B	A	B	A	B	B	A	A	B	A	A	A	A	B	A	B	A	B	B	A	A	A	A	A
GENE-0256_368		IWB31769	1B	28.412	1B	74.76							A	B	B	B	A	B	A	A	A	B	B	A	A	B	A	B	A	B	B	A	A	B	A	A	A	A	B	A	B	A	B	B	A	A	A	A	A
GENE-0221_100		IWB31752	1B	28.412	1B	154.59							A	B	B	B	A	B	A	A	A	B	B	A	A	B	A	B	A	B	B	A	A	B	A	A	A	A	B	A	B	A	B	B	A	A	A	A	A
GENE-0189_307		IWB31730	1B	28.412	1B	159.06							A	B	B	B	A	B	A	A	A	B	B	A	A	B	A	B	A	B	B	A	A	B	A	A	A	A	B	A	B	A	B	B	A	A	A	A	A
GENE-0121_495		IWB31686	1B	28.412	1B	159.06							A	B	B	B	A	B	A	A	A	B	B	A	A	B	A	B	A	B	B	A	A	B	A	A	A	A	B	A	B	A	B	B	A	A	A	A	A
GENE-0040_121		IWB31632	1B	28.412	1B	154.59							A	B	B	B	A	B	A	A	A	B	B	A	A	B	A	B	A	B	B	A	A	B	A	A	A	A	B	A	B	A	B	B	A	A	A	A	A
GENE-0032_951		IWB31624	1B	28.412	1B	159.06							A	B	B	B	A	B	A	A	A	B	B	A	A	B	A	B	A	B	B	A	A	B	A	A	A	A	B	A	B	A	B	B	A	A	A	A	A
Excalibur_rep_c113275_136		IWB30624	1B	28.412	1B	160.39							A	B	B	B	A	B	A	A	A	B	B	A	A	B	A	B	A	B	B	A	A	B	A	A	A	A	B	A	B	A	B	B	A	A	A	A	A
Excalibur_rep_c112996_167		IWB30609	1B	28.412	1B	154.59							A	B	B	B	A	B	A	A	A	B	B	A	A	B	A	B	A	B	B	A	A	B	A	A	A	A	B	A	B	A	B	B	A	A	A	A	A
Excalibur_c6213_689		IWB28100	1B	28.412	1B	74.76							A	B	B	B	A	B	A	A	A	B	B	A	A	B	A	B	A	B	B	A	A	B	A	A	A	A	B	A	B	A	B	B	A	A	A	A	A
Excalibur_c56029_277		IWB27619	1B	28.412	1B	159.06							A	B	B	B	A	B	A	A	A	B	B	A	A	B	A	B	A	B	B	A	A	B	A	A	A	A	B	A	B	A	B	B	A	A	A	A	A
Excalibur_c55348_283		IWB27557	1B	28.412	1B	154.59							A	B	B	B	A	B	A	A	A	B	B	A	A	B	A	B	A	B	B	A	A	B	A	A	A	A	B	A	B	A	B	B	A	A	A	A	A
Excalibur_c43347_79		IWB26434	1B	28.412	1B	159.06							A	B	B	B	A	B	A	A	A	B	B	A	A	B	A	B	A	B	B	A	A	B	A	A	A	A	B	A	B	A	B	B	A	A	A	A	A
Excalibur_c34148_481		IWB25424	1B	28.412	1B	84							A	B	B	B	A	B	A	A	A	B	B	A	A	B	A	B	A	B	B	A	A	B	A	A	A	A	B	A	B	A	B	B	A	A	A	A	A
Excalibur_c32726_125	TG15956A	IWB25250	1B	28.412	1B	172.49	1B	5.1					A	B	B	B	A	B	A	A	A	B	B	A	A	B	A	B	A	B	B	A	A	B	A	A	A	A	B	A	B	A	B	B	A	A	A	A	A
Excalibur_c2906_555		IWB24791	1B	28.412	1B	160.39							A	B	B	B	A	B	A	A	A	B	B	A	A	B	A	B	A	B	B	A	A	B	A	A	A	A	B	A	B	A	B	B	A	A	A	A	A
Excalibur_c2868_1808		IWB24739	1B	28.412	1B	160.39							A	B	B	B	A	B	A	A	A	B	B	A	A	B	A	B	A	B	B	A	A	B	A	A	A	A	B	A	B	A	B	B	A	A	A	A	A
Excalibur_c28016_132		IWB24659	1B	28.412	1B	88.38			1B	60.2128			A	B	B	B	A	B	A	A	A	B	B	A	A	B	A	B	A	B	B	A	A	B	A	A	A	A	B	A	B	A	B	B	A	A	A	A	A
Excalibur_c25624_86		IWB24346	1B	28.412	1B	159.06							A	B	B	B	A	B	A	A	A	B	B	A	A	B	A	B	A	B	B	A	A	B	A	A	A	A	B	A	B	A	B	B	A	A	A	A	A
Excalibur_c24859_517		IWB24231	1B	28.412	1B	160.39							A	B	B	B	A	B	A	A	A	B	B	A	A	B	A	B	A	B	B	A	A	B	A	A	A	A	B	A	B	A	B	B	A	A	A	A	A
Excalibur_c24105_135		IWB24097	1B	28.412	1B	160.39							A	B	B	B	A	B	A	A	A	B	B	A	A	B	A	B	A	B	B	A	A	B	A	A	A	A	B	A	B	A	B	B	A	A	A	A	A
Excalibur_c20610_149		IWB23524	1B	28.412	1B	159.06							A	B	B	B	A	B	A	A	A	B	B	A	A	B	A	B	A	B	B	A	A	B	A	A	A	A	B	A	B	A	B	B	A	A	A	A	A
Excalibur_c2016_292		IWB23435	1B	28.412	1B	159.06							A	B	B	B	A	B	A	A	A	B	B	A	A	B	A	B	A	B	B	A	A	B	A	A	A	A	B	A	B	A	B	B	A	A	A	A	A
Excalibur_c19341_673		IWB23293	1B	28.412	1B	160.39							A	B	B	B	A	B	A	A	A	B	B	A	A	B	A	B	A	B	B	A	A	B	A	A	A	A	B	A	B	A	B	B	A	A	A	A	A
Excalibur_c19291_571		IWB23285	1B	28.412	1B	160.28							A	B	B	B	A	B	A	A	A	B	B	A	A	B	A	B	A	B	B	A	A	B	A	A	A	A	B	A	B	A	B	B	A	A	A	A	A
Excalibur_c17202_1833	TG26191B	IWB22930	1B	28.412	1B	99.39	1B	3.4					A	B	B	B	A	B	A	A	A	B	B	A	A	B	A	B	A	B	B	A	A	B	A	A	A	A	B	A	B	A	B	B	A	A	A	A	A
Excalibur_c14273_1928		IWB22398	1B	28.412	1B	84							A	B	B	B	A	B	A	A	A	B	B	A	A	B	A	B	A	B	B	A	A	B	A	A	A	A	B	A	B	A	B	B	A	A	A	A	A
Ex_c2725_1442	TG25991B	IWB20364	1B	28.412	1B	159.02	1B	2.9					A	B	B	B	A	B	A	A	A	B	B	A	A	B	A	B	A	B	B	A	A	B	A	A	A	A	B	A	B	A	B	B	A	A	A	A	A
D_GB5Y7FA01BMOJY_241		IWB17979	1B	28.412	1B	170.93			1B	38.2786			A	B	B	B	A	B	A	A	A	B	B	A	A	B	A	B	A	B	B	A	A	B	A	A	A	A	B	A	B	A	B	B	A	A	A	A	A
D_GA8KES401BUJHD_322		IWB17731	1B	28.412	1B	154.59							A	B	B	B	A	B	A	A	A	B	B	A	A	B	A	B	A	B	B	A	A	B	A	A	A	A	B	A	B	A	B	B	A	A	A	A	A
D_contig33799_445		IWB16588	1B	28.412	1B	154.59							A	B	B	B	A	B	A	A	A	B	B	A	A	B	A	B	A	B	B	A	A	B	A	A	A	A	B	A	B	A	B	B	A	A	A	A	A
CAP8_rep_c9642_82	TG25831B	IWB15085	1B	28.412	1B	107.7	1B	4.6					A	B	B	B	A	B	A	A	A	B	B	A	A	B	A	B	A	B	B	A	A	B	A	A	A	A	B	A	B	A	B	B	A	A	A	A	A
BS00110463_51		IWB12544	1B	28.412	1B	154.59							A	B	B	B	A	B	A	A	A	B	B	A	A	B	A	B	A	B	B	A	A	B	A	A	A	A	B	A	B	A	B	B	A	A	A	A	A
BS00108243_51		IWB12355	1B	28.412	1B	154.59							A	B	B	B	A	B	A	A	A	B	B	A	A	B	A	B	A	B	B	A	A	B	A	A	A	A	B	A	B	A	B	B	A	A	A	A	A
BS00097523_51		IWB12005	1B	28.412	1B	154.59							A	B	B	B	A	B	A	A	A	B	B	A	A	B	A	B	A	B	B	A	A	B	A	A	A	A	B	A	B	A	B	B	A	A	A	A	A
BS00096054_51		IWB11949	1B	28.412	1D	6.15							A	B	B	B	A	B	A	A	A	B	B	A	A	B	A	B	A	B	B	A	A	B	A	A	A	A	B	A	B	A	B	B	A	A	A	A	A
BS00095478_51		IWB11931	1B	28.412	1B	122.77					1B	42.5	A	B	B	B	A	B	A	A	A	B	B	A	A	B	A	B	A	B	B	A	A	B	A	A	A	A	B	A	B	A	B	B	A	A	A	A	A
BS00092426_51		IWB11757	1B	28.412	1B	159.06							A	B	B	B	A	B	A	A	A	B	B	A	A	B	A	B	A	B	B	A	A	B	A	A	A	A	B	A	B	A	B	B	A	A	A	A	A
BS00081569_51		IWB11196	1B	28.412	1B	154.59							A	B	B	B	A	B	A	A	A	B	B	A	A	B	A	B	A	B	B	A	A	B	A	A	A	A	B	A	B	A	B	B	A	A	A	A	A
BS00079450_51		IWB11080	1B	28.412	1B	160.28							A	B	B	B	A	B	A	A	A	B	B	A	A	B	A	B	A	B	B	A	A	B	A	A	A	A	B	A	B	A	B	B	A	A	A	A	A
BS00070878_51		IWB10511	1B	28.412	1D	14.19							A	B	B	B	A	B	A	A	A	B	B	A	A	B	A	B	A	B	B	A	A	B	A	A	A	A	B	A	B	A	B	B	A	A	A	A	A
BS00067709_51		IWB10127	1B	28.412	1B	160.39							A	B	B	B	A	B	A	A	A	B	B	A	A	B	A	B	A	B	B	A	A	B	A	A	A	A	B	A	B	A	B	B	A	A	A	A	A
BS00067201_51		IWB9984	1B	28.412	1B	154.59							A	B	B	B	A	B	A	A	A	B	B	A	A	B	A	B	A	B	B	A	A	B	A	A	A	A	B	A	B	A	B	B	A	A	A	A	A
BS00066398_51		IWB9794	1B	28.412	1B	160.39							A	B	B	B	A	B	A	A	A	B	B	A	A	B	A	B	A	B	B	A	A	B	A	A	A	A	B	A	B	A	B	B	A	A	A	A	A
BS00066117_51		IWB9719	1B	28.412	1B	160.39							A	B	B	B	A	B	A	A	A	B	B	A	A	B	A	B	A	B	B	A	A	B	A	A	A	A	B	A	B	A	B	B	A	A	A	A	A
BS00065882_51		IWB9658	1B	28.412	1B	182.77							A	B	B	B	A	B	A	A	A	B	B	A	A	B	A	B	A	B	B	A	A	B	A	A	A	A	B	A	B	A	B	B	A	A	A	A	A
BS00065314_51		IWB9510	1B	28.412	1B	154.59							A	B	B	B	A	B	A	A	A	B	B	A	A	B	A	B	A	B	B	A	A	B	A	A	A	A	B	A	B	A	B	B	A	A	A	A	A
BS00064929_51		IWB9404	1B	28.412	1B	154.59							A	B	B	B	A	B	A	A	A	B	B	A	A	B	A	B	A	B	B	A	A	B	A	A	A	A	B	A	B	A	B	B	A	A	A	A	A
BS00063080_51		IWB8997	1B	28.412	1B	160.39							A	B	B	B	A	B	A	A	A	B	B	A	A	B	A	B	A	B	B	A	A	B	A	A	A	A	B	A	B	A	B	B	A	A	A	A	A
BS00062723_51		IWB8900	1B	28.412	1B	160.39							A	B	B	B	A	B	A	A	A	B	B	A	A	B	A	B	A	B	B	A	A	B	A	A	A	A	B	A	B	A	B	B	A	A	A	A	A
BS00030667_51		IWB7791	1B	28.412	1B	159.06							A	B	B	B	A	B	A	A	A	B	B	A	A	B	A	B	A	B	B	A	A	B	A	A	A	A	B	A	B	A	B	B	A	A	A	A	A
BS00029013_51		IWB7703	1B	28.412	1B	124.78							A	B	B	B	A	B	A	A	A	B	B	A	A	B	A	B	A	B	B	A	A	B	A	A	A	A	B	A	B	A	B	B	A	A	A	A	A
BS00021902_51		IWB6789	1B	28.412	1B	160.39							A	B	B	B	A	B	A	A	A	B	B	A	A	B	A	B	A	B	B	A	A	B	A	A	A	A	B	A	B	A	B	B	A	A	A	A	A
BS00021870_51		IWB6773	1B	28.412	1B	154.59							A	B	B	B	A	B	A	A	A	B	B	A	A	B	A	B	A	B	B	A	A	B	A	A	A	A	B	A	B	A	B	B	A	A	A	A	A
BS00005004_51	TG33831B	IWB5995	1B	28.412	1B	74.76	1B	3.4					A	B	B	B	A	B	A	A	A	B	B	A	A	B	A	B	A	B	B	A	A	B	A	A	A	A	B	A	B	A	B	B	A	A	A	A	A
BS00004981_51		IWB5994	1B	28.412	1B	159.06							A	B	B	B	A	B	A	A	A	B	B	A	A	B	A	B	A	B	B	A	A	B	A	A	A	A	B	A	B	A	B	B	A	A	A	A	A
BS00004903_51	TG11701B	IWB5992	1B	28.412	1A	32.52	1B	1.7					A	B	B	B	A	B	A	A	A	B	B	A	A	B	A	B	A	B	B	A	A	B	A	A	A	A	B	A	B	A	B	B	A	A	A	A	A
BS00003575_51	TG14021B	IWB5835	1B	28.412	1B	172.13	1B	2.9					A	B	B	B	A	B	A	A	A	B	B	A	A	B	A	B	A	B	B	A	A	B	A	A	A	A	B	A	B	A	B	B	A	A	A	A	A
BobWhite_c6812_144		IWB4240	1B	28.412	1B	160.39							A	B	B	B	A	B	A	A	A	B	B	A	A	B	A	B	A	B	B	A	A	B	A	A	A	A	B	A	B	A	B	B	A	A	A	A	A
BobWhite_c44165_441		IWB3353	1B	28.412	1B	159.06							A	B	B	B	A	B	A	A	A	B	B	A	A	B	A	B	A	B	B	A	A	B	A	A	A	A	B	A	B	A	B	B	A	A	A	A	A
BobWhite_c4147_1429		IWB3176	1B	28.412	1B	173.72							A	B	B	B	A	B	A	A	A	B	B	A	A	B	A	B	A	B	B	A	A	B	A	A	A	A	B	A	B	A	B	B	A	A	A	A	A
BobWhite_c4147_1351		IWB3175	1B	28.412	1B	159.65							A	B	B	B	A	B	A	A	A	B	B	A	A	B	A	B	A	B	B	A	A	B	A	A	A	A	B	A	B	A	B	B	A	A	A	A	A
BobWhite_c18208_142		IWB1142	1B	28.412	1B	159.06							A	B	B	B	A	B	A	A	A	B	B	A	A	B	A	B	A	B	B	A	A	B	A	A	A	A	B	A	B	A	B	B	A	A	A	A	A
BobWhite_c12695_394		IWB394	1B	28.412	1B	154.59							A	B	B	B	A	B	A	A	A	B	B	A	A	B	A	B	A	B	B	A	A	B	A	A	A	A	B	A	B	A	B	B	A	A	A	A	A
BS00067567_51		IWB10080	1B	28.412	1B	159.06							A	B	B	B	A	B	A	A	A	B	B	A	A	B	A	B	A	B	B	A	A	B	A	A	A	A	B	A	B	A	B	B	A	A	A	A	A
D_contig33959_220		IWB16597	1B	28.412									A	B	B	B	A	B	A	A	A	B	B	A	A	U	A	B	A	B	U	A	A	B	A	A	A	A	U	A	B	A	B	B	A	A	A	A	A
wsnp_Ex_c6417_11155739	TG45551B	IWA4504	1B	28.412	1B	87.67	1B	8.6	1B	60.2128			A	B	B	B	A	B	A	A	A	B	B	A	A	B	A	B	A	B	B	A	A	B	A	A	A	A	B	A	B	A	B	B	A	A	A	A	A
wsnp_Ex_c14832_22953512		IWA1947	1B	28.412									A	B	B	B	A	B	A	A	A	B	B	A	A	B	A	B	A	B	B	A	A	B	A	A	A	A	B	A	B	A	B	B	A	A	A	A	A
wsnp_Ex_c12063_19310114	TG10021B	IWA1578	1B	28.412	1B	87.67	1B	8.6					A	B	B	B	A	B	A	A	A	B	B	A	A	B	A	B	A	B	B	A	A	B	A	A	A	A	B	A	B	A	B	B	A	A	A	A	A
wsnp_BE637971B_Ta_1_20	TG44461B	IWA406	1B	28.412	1B	170.93	1B	8	1B	38.2786			A	B	B	B	A	B	A	A	A	B	B	A	A	B	A	B	A	B	B	A	A	B	A	A	A	A	B	A	B	A	B	B	A	A	A	A	A
tplb0055p02_1074	TG01521B	IWB75093	1B	28.412	1B	160.39	1B	4.6					A	B	B	B	A	B	A	A	A	B	B	A	A	B	A	B	A	B	B	A	A	B	A	A	A	A	B	A	B	A	B	B	A	A	A	A	A
tplb0038o14_241		IWB74654	1B	28.412	1B	159.06							A	B	B	B	A	B	A	A	A	B	B	A	A	B	A	B	A	B	B	A	A	B	A	A	A	A	B	A	B	A	B	B	A	A	A	A	A
tplb0025b13_352		IWB74221	1B	28.412	1B	74.76							A	B	B	B	A	B	A	A	A	B	B	A	A	B	A	B	A	B	B	A	A	B	A	A	A	A	B	A	B	A	B	B	A	A	A	A	A
Tdurum_contig9874_547	TG44231B	IWB74050	1B	28.412	1B	159.06	1B	5.1					A	B	B	B	A	B	A	A	A	B	B	A	A	B	A	B	A	B	B	A	A	B	A	A	A	A	B	A	B	A	B	B	A	A	A	A	A
Tdurum_contig9874_391	TG4822	IWB74048	1B	28.412	1B	74.76	1B	2.9	1B	60.2128			A	B	B	B	A	B	A	A	A	B	B	A	A	B	A	B	A	B	B	A	A	B	A	A	A	A	B	A	B	A	B	B	A	A	A	A	A
Tdurum_contig42092_281	TG4373	IWB70814	1B	28.412	1B	160.39	1B	3.4					A	B	B	B	A	B	A	A	A	B	B	A	A	B	A	B	A	B	B	A	A	B	A	A	A	A	B	A	B	A	B	B	A	A	A	A	A
Tdurum_contig34379_237		IWB70500	1B	28.412	1B	159.06							A	B	B	B	A	B	A	A	A	B	B	A	A	B	A	B	A	B	B	A	A	B	A	A	A	A	B	A	B	A	B	B	A	A	A	A	A
Tdurum_contig29891_62		IWB69909	1B	28.412	1B	160.39							A	B	B	B	A	B	A	A	A	B	B	A	A	B	A	B	A	B	B	A	A	B	A	A	A	A	B	A	B	A	B	B	A	A	A	A	A
Tdurum_contig27840_760		IWB69334	1B	28.412	1B	74.76							A	B	B	B	A	B	A	A	A	B	B	A	A	B	A	B	A	B	B	A	A	B	A	A	A	A	B	A	B	A	B	B	A	A	A	A	A
Tdurum_contig27840_304		IWB69333	1B	28.412	1B	160.39							A	B	B	B	A	B	A	A	A	B	B	A	A	B	A	B	A	B	B	A	A	B	A	A	A	A	B	A	B	A	B	B	A	A	A	A	A
Tdurum_contig19251_515		IWB68784	1B	28.412	1B	160.28							A	B	B	B	A	B	A	A	A	B	B	A	A	B	A	B	A	B	B	A	A	B	A	A	A	A	B	A	B	A	B	B	A	A	A	A	A
Tdurum_contig19251_352		IWB68783	1B	28.412	1B	160.39							A	B	B	B	A	B	A	A	A	B	B	A	A	B	A	B	A	B	B	A	A	B	A	A	A	A	B	A	B	A	B	B	A	A	A	A	A
[truncated: 8,036 more rows]
[truncated: 341 more columns]

## Sheet: S5
Supplementary Table S5: Details of mapped single nucleotide polymorphism (SNP) markers, map length and SNP densities of individual chromosomes, seven homoeologous groups and three genomes (A, B and D).
[truncated: 80 more rows]

[truncated: 7 more sheets: S6, S7, S8, S9, S10, S11, S12]
